# Supplementary material
Source: PubMed Central journal article supplement (PMC4073647)
Supplement: NIHMS545889-supplement-1_si_001.pdf [file NIHMS545889-supplement-1_si_001.pdf]

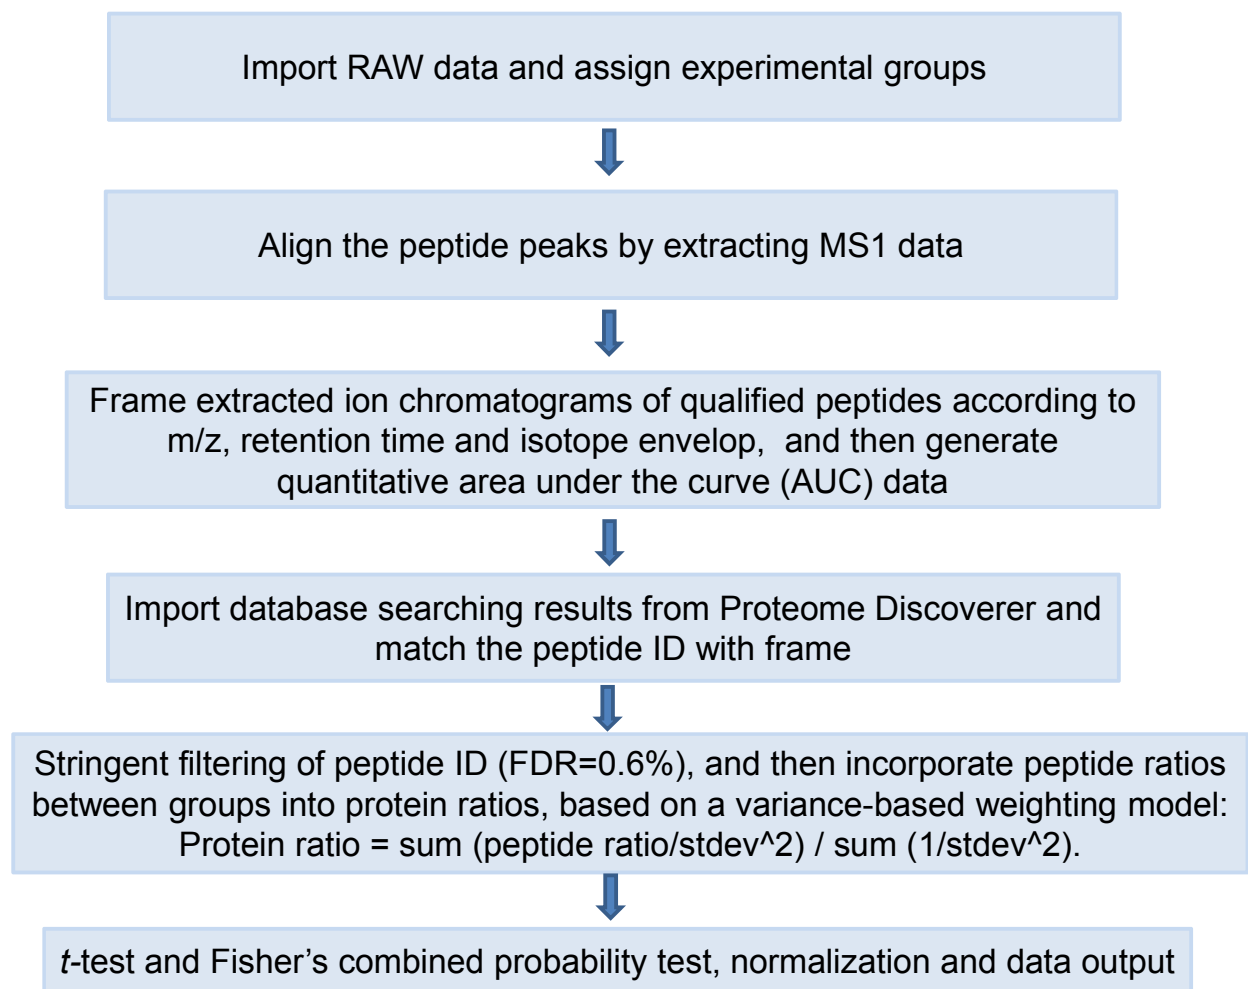

**Supplemental Fig. 1.** The flow chart of SIEVE analysis. The raw files generated were imported and classified into different experimental groups. The SIEVE software used the ChromAlign algorithm to perform chromatographic alignment across multiple LC-MS/MS runs. After the alignment, the quantitative frames were generated based upon the precursor m/z and retention time. The area under the curve (AUC) values were calculated by SIEVE based on extracted ion chromatograms of each precursor ion. Normalization of peak areas was achieved based on the individual total ion current (TIC) chromatograms in each LC-MS/MS run. All raw files were searched against the human database using Proteome Discoverer software. The resulted files were imported and the protein/peptide information was assigned to each frame. Only peptides with unique protein assignments were considered. Through filtering and calculation of protein ratio based on the weighting formula: Protein ratio =  $\sum (\text{peptide ratio}/\text{stdev}^2) / \sum (1/\text{stdev}^2)$ , relative quantification ratios of protein and peptide was presented by SIEVE.

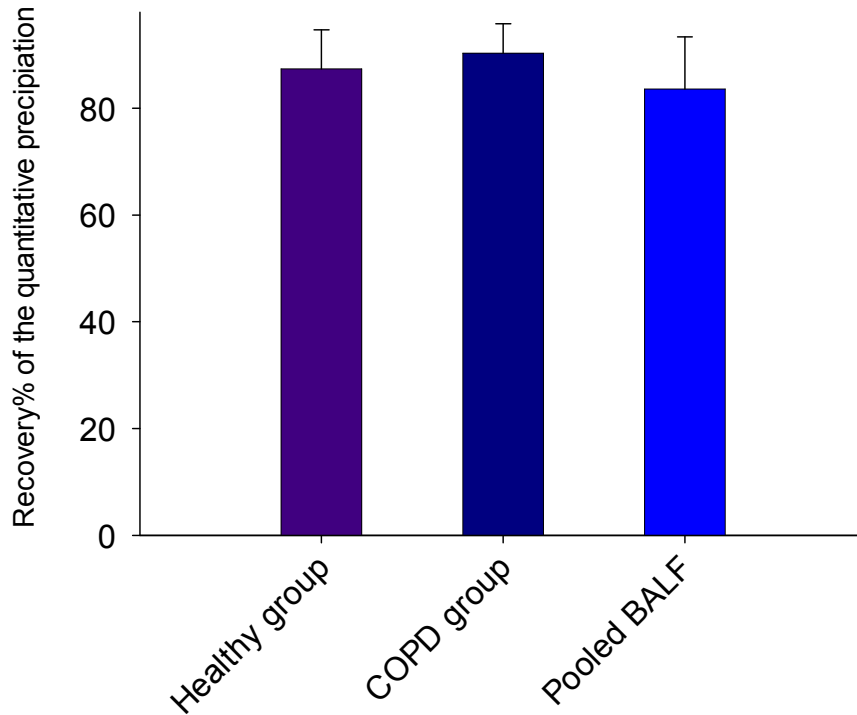

**Supplemental Fig. 2.** The protein recoveries (as determined by a triplicate BCA assay) of the quantitative precipitation to normalize the protein concentrations in various BALF samples ( $n=10$  per group). Before normalization, the starting concentrations in all groups were highly variable (0.07-0.29 mg/mL) due to the dilution factors of the BAL procedure.

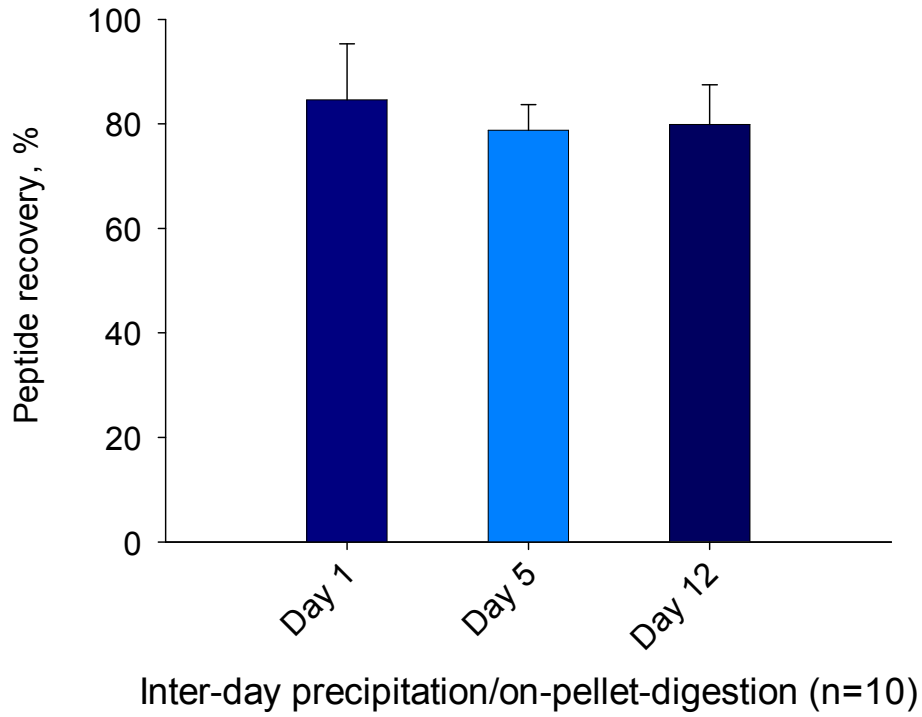

**Supplemental Fig. 3.** The assessment of inter-day peptide recovery and reproducibility by digesting a pooled BALF at three different days. The peptide recovery was measured with a modified BCA method.

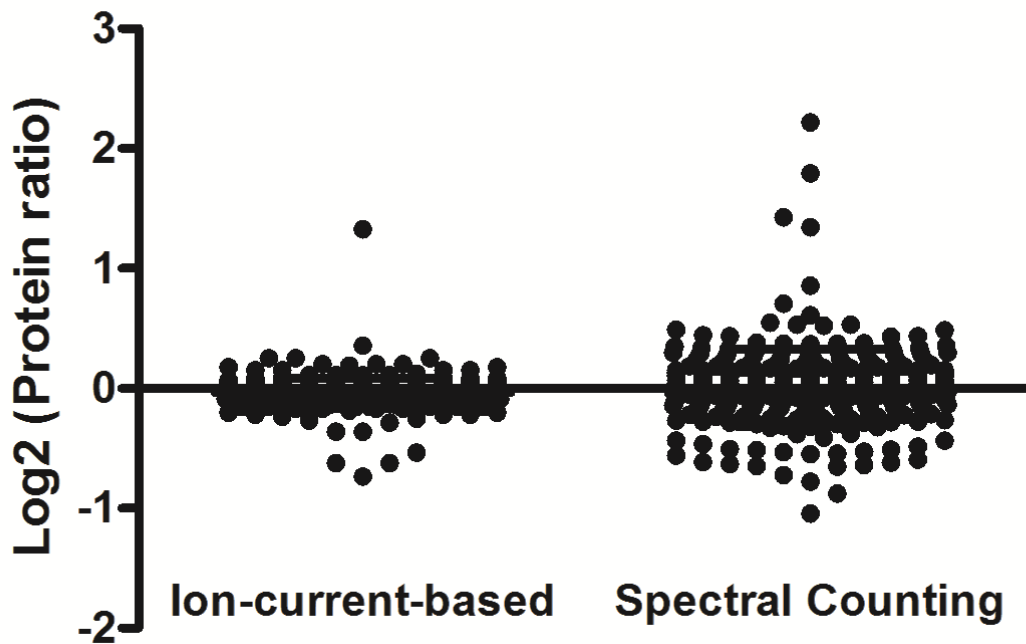

**Supplemental Fig. 4.** The distribution of protein ratios determined by ion-current-based approach (A) and spectral counting (B) in the technical replicate set (20 preparation and analyses of the same pooled sample, with 10 randomly assigned as the experiment group and 10 as the control group). The theoretical ratio of proteins between the experiment group and control group is 1.0 (Log<sub>2</sub> value is 0). The ratios of proteins determined by ion-current-based approach were much tightly centered around the theoretical value than by spectral counting, indicating better quantitative accuracy for relative protein quantification by ion-current-based approach.

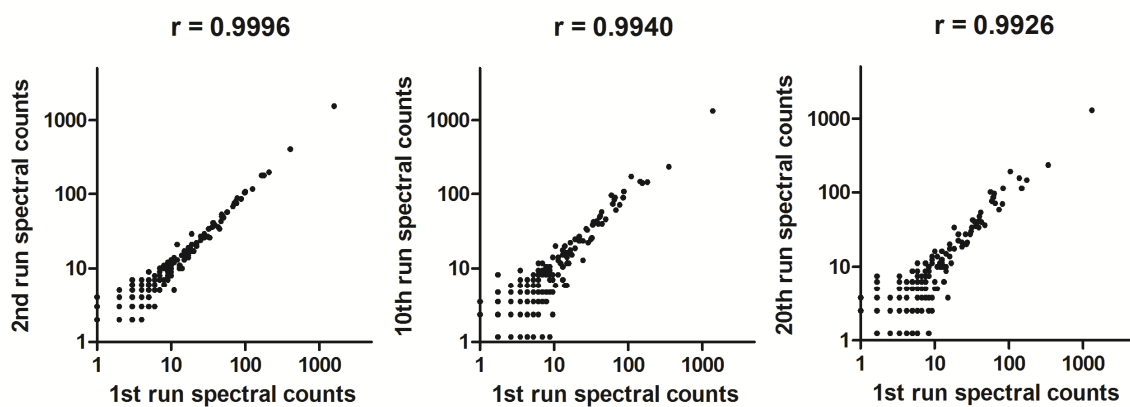

**Supplemental Fig. 5.** The representative plots for linear correlations of the spectral counts (a more traditional method for the determination of run-to-run reproducibility) between two analyses: the 2<sup>nd</sup>, 10<sup>th</sup> and 20<sup>th</sup> runs vs. the 1<sup>st</sup> run. Pearson correlation coefficient ( $r$ ) is shown for each comparison.

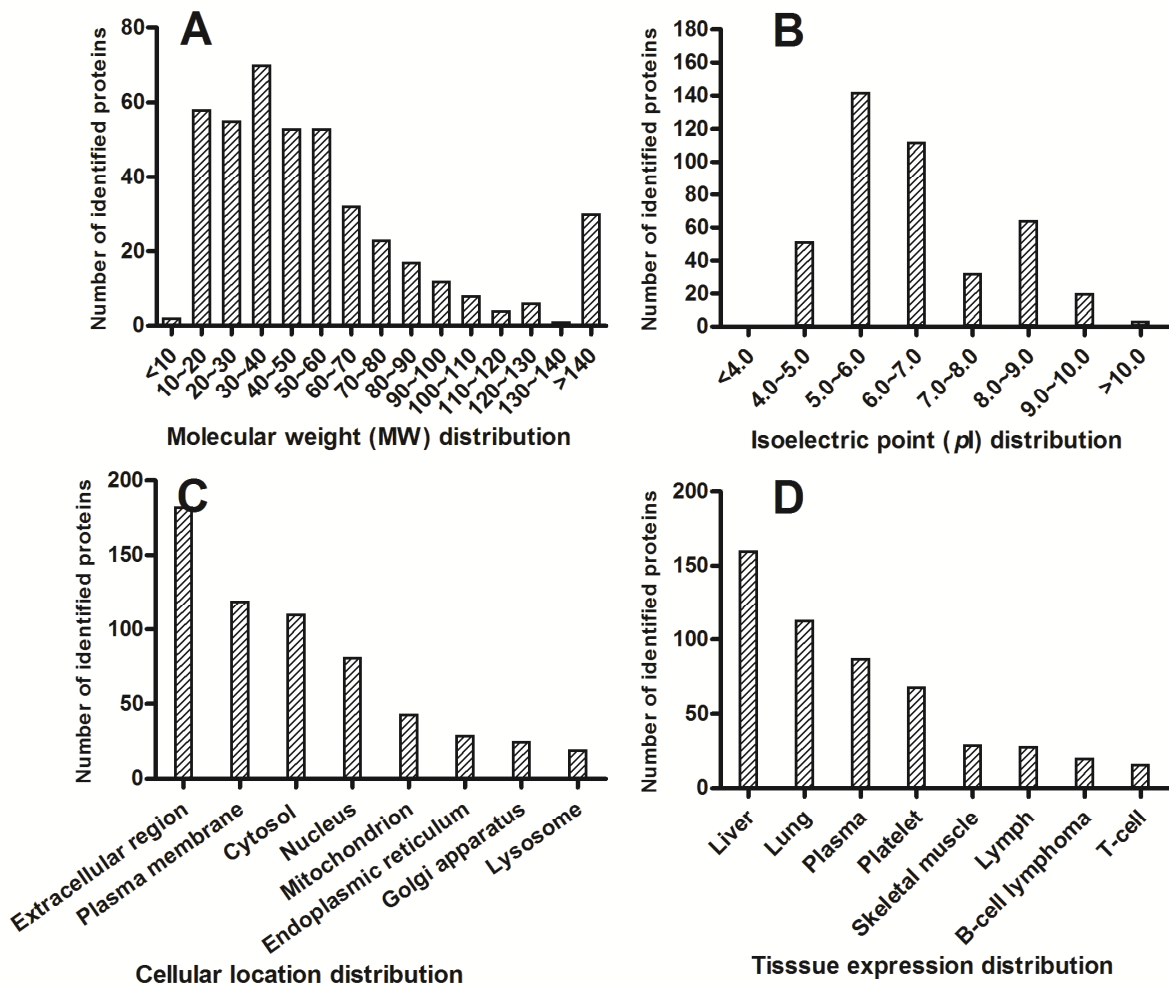

**Supplemental Fig. 6.** Characteristics of the 423 identified proteins from BALF samples. (A) MW distribution. (B) pI distribution. (C) Cellular location distribution. (D) Tissue expression distribution.

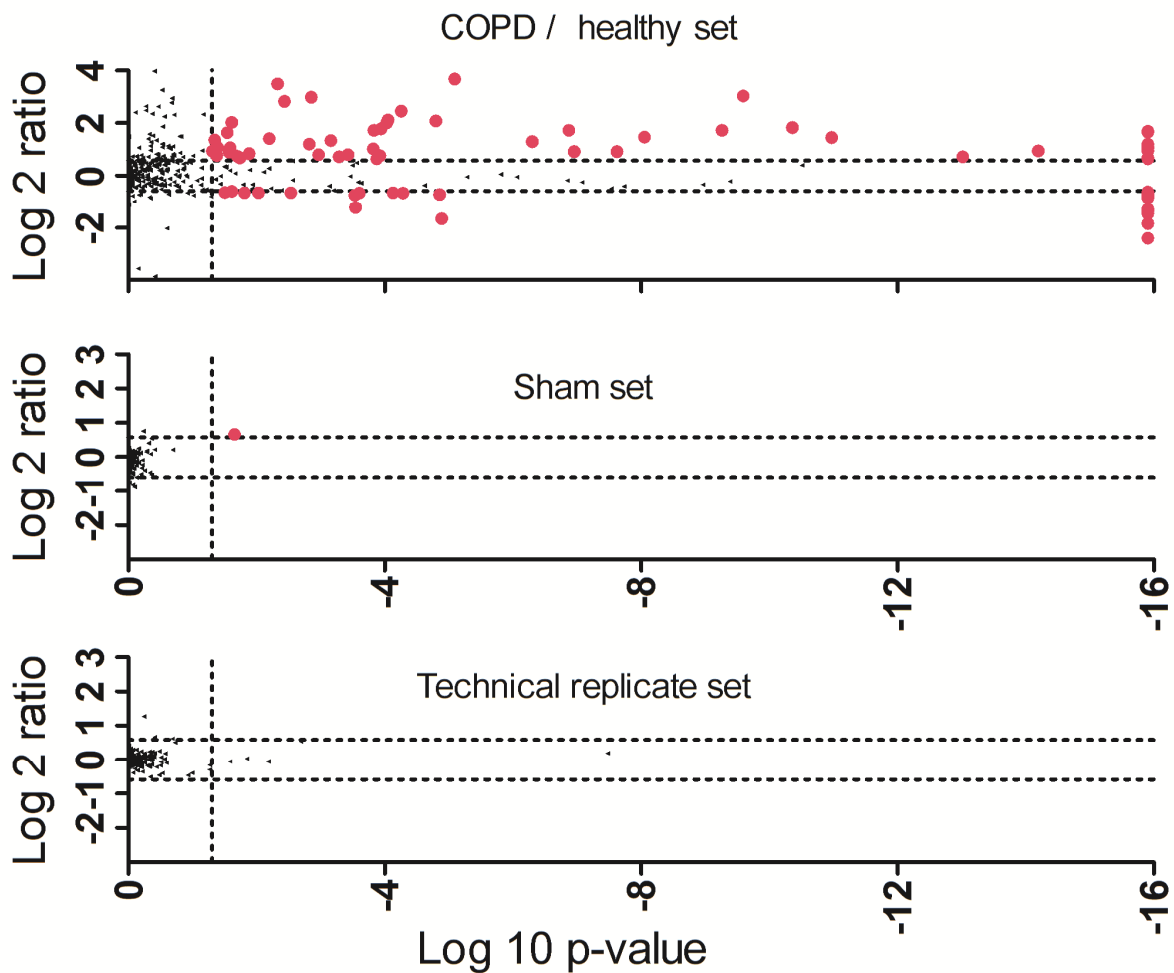

**Supplemental Fig. 7.** The volcano plots of the COPD/control set, the Sham set (20 BALF samples from individual healthy subjects, with 10 randomly assigned as the experiment group and 10 as the control group) and the technical replicates set (20 preparation and analyses of the same pooled sample, with 10 randomly assigned as the experiment group and 10 as the control group). The Y axis shows the altered ratios of protein levels between two groups, while the X axis shows the  $p$  values for the comparison. Each dot represent a unique protein group and the dashed lines denote the optimized cutoff thresholds ( $p < 0.05$  and  $> 1.5$ -fold change) that define significantly-altered proteins, which are shown as red dots.

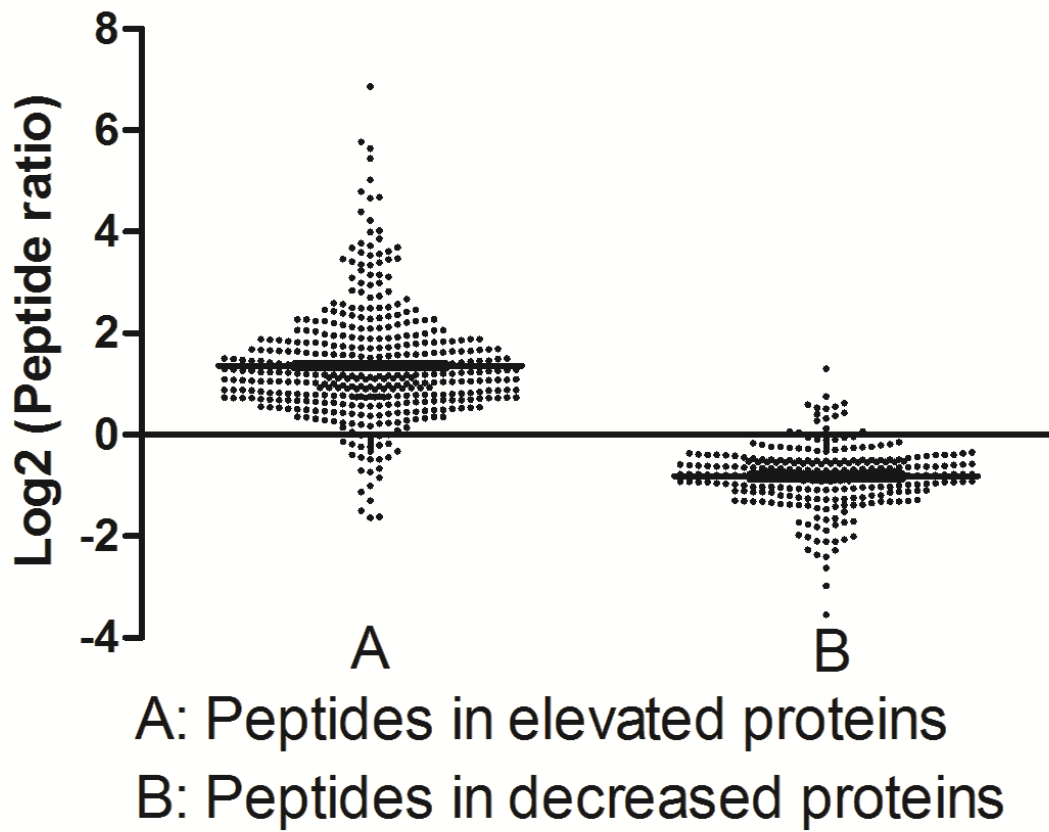

**Supplemental Fig. 8.** The distribution of peptide ratios assigned to elevated proteins (A) and decreased proteins (B) observed in COPD patients versus healthy controls.



**Supplemental Table I**  
**Protein relative expression ratios in the technical replicate dataset**

| Accession Number | Gene Name | Protein Name                                                           | No. of quantified peptides | Frames | Hits | Ratio        | StDev        | p value       |
|------------------|-----------|------------------------------------------------------------------------|----------------------------|--------|------|--------------|--------------|---------------|
| A0M8Q6           | LAC7      | Ig lambda_7 chain C region                                             | 2                          | 36     | 473  | 0.97         | 0.11         | 1.00          |
|                  |           | <b>Peptide</b>                                                         |                            |        |      | <b>Ratio</b> | <b>Xcorr</b> | <b>Charge</b> |
|                  |           | AAPSVTLFPPSSEELQANK                                                    |                            |        |      | 0.99         | 4.6          | 2             |
|                  |           | YAASSYLSLTPEQWK                                                        |                            |        |      | 0.92         | 5.7          | 2             |
| A6NMY6           | AXA2L     | Putative annexin A2_like protein                                       | 11                         | 21     | 132  | 0.96         | 0.14         | 1.00          |
|                  |           | ALLYLCGGDD                                                             |                            |        |      | 1.08         | 1.8          | 1             |
|                  |           | AYTNFDAER                                                              |                            |        |      | 0.84         | 2.4          | 2             |
|                  |           | DIISDTSGDFR                                                            |                            |        |      | 1.03         | 3.1          | 2             |
|                  |           | GLGTDEDSLIEICSR                                                        |                            |        |      | 0.74         | 3.9          | 2             |
|                  |           | LSLEGDHSTPPSAYGSVK                                                     |                            |        |      | 1.05         | 4.4          | 2             |
|                  |           | SALSGHLETVILGLLK                                                       |                            |        |      | 0.94         | 4.5          | 2             |
|                  |           | SLYYYIQQDTK                                                            |                            |        |      | 0.76         | 3.7          | 2             |
|                  |           | TDLEKDIISDTSGDFR                                                       |                            |        |      | 0.98         | 3.9          | 2             |
|                  |           | TDLEKDIISDTSGDFRK                                                      |                            |        |      | 0.96         | 4.5          | 3             |
|                  |           | TNQELQEINR                                                             |                            |        |      | 0.86         | 3.2          | 2             |
|                  |           | WISIMTER+Oxidation(4)                                                  |                            |        |      | 0.88         | 2.1          | 2             |
| B1AJZ9           | FHAD1     | Forkhead_associated domain_containing protein 1                        | 2                          | 2      | 2    | 0.98         | 0.44         | 0.68          |
|                  |           | EKMAQMSSSLVEKK+Oxidation(5)                                            |                            |        |      | 1.14         | 2.3          | 2             |
|                  |           | KASLKMDQER                                                             |                            |        |      | 0.91         | 2.4          | 2             |
| O00299           | CLIC1     | Chloride intracellular channel protein 1                               | 4                          | 6      | 30   | 0.94         | 0.26         | 0.98          |
|                  |           | FLDGNELTLADCNLLPK                                                      |                            |        |      | 0.91         | 3.2          | 2             |
|                  |           | GFTIPEAFR                                                              |                            |        |      | 0.90         | 2.4          | 2             |
|                  |           | LAALNPESNTAGLDIFAK                                                     |                            |        |      | 0.94         | 4.2          | 2             |
|                  |           | VLDNYLTSPLPEEVDETSAEDEGVSR                                             |                            |        |      | 1.08         | 4.6          | 2             |
| O00391           | QSOX1     | Sulfhydryl oxidase 1                                                   | 3                          | 7      | 31   | 0.98         | 0.25         | 1.00          |
|                  |           | AHFSPSNIILDFPAAGSAAR                                                   |                            |        |      | 0.92         | 5.0          | 2             |
|                  |           | SALYSPSDPLTLLQADTVR                                                    |                            |        |      | 1.01         | 3.7          | 2             |
|                  |           | VLNTEANVVR                                                             |                            |        |      | 1.06         | 2.2          | 2             |
| O00560           | SDCB1     | Syntenin_1                                                             | 2                          | 3      | 3    | 0.94         | 0.35         | 0.86          |
|                  |           | DSTGHVGFIFK                                                            |                            |        |      | 0.96         | 2.2          | 2             |
|                  |           | FGDQVLQINGENCAGWSSDK                                                   |                            |        |      | 0.89         | 4.4          | 2             |
| O00757           | F16P2     | Fructose_1_6_bisphosphatase isozyme 2                                  | 3                          | 6      | 18   | 0.95         | 0.38         | 1.00          |
|                  |           | GTGELTQLLNSMLTAIK+Oxidation(11)                                        |                            |        |      | 0.89         | 2.5          | 2             |
|                  |           | IYSLNEGYAK                                                             |                            |        |      | 0.95         | 2.4          | 2             |
|                  |           | YVGSMVADVHR+Oxidation(4)                                               |                            |        |      | 0.98         | 2.6          | 2             |
| O15050           | TRNK1     | TPR and ankyrin repeat_containing protein 1                            | 2                          | 5      | 27   | 1.01         | 0.25         | 1.00          |
|                  |           | FDINFNLKKNKEGK                                                         |                            |        |      | 0.98         | 2.5          | 2             |
|                  |           | YLSANKMK+Oxidation(6)                                                  |                            |        |      | 1.03         | 2.3          | 1             |
| O15417           | TNC18     | Trinucleotide repeat_containing gene 18 protein                        | 2                          | 2      | 4    | 0.94         | 0.34         | 0.80          |
|                  |           | LTPSLLCSMVAK+Oxidation(8)                                              |                            |        |      | 0.95         | 2.1          | 2             |
|                  |           | QDEGARLLRR                                                             |                            |        |      | 0.93         | 2.3          | 2             |
| O43150           | ASAP2     | Arf_GAP with SH3 domain_ ANK repeat and PH domain_containing protein 2 | 2                          | 2      | 3    | 0.94         | 0.65         | 0.49          |
|                  |           | EIISEVQR                                                               |                            |        |      | 0.56         | 2.1          | 2             |
|                  |           | MVLYKMK+Oxidation(0)                                                   |                            |        |      | 1.06         | 1.8          | 1             |
| O43264           | ZW10      | Centromere/kinetochore protein zw10 homolog                            | 2                          | 2      | 5    | 0.97         | 0.42         | 1.00          |
|                  |           | ELMMMLQASLQEIGDR                                                       |                            |        |      | 0.94         | 2.1          | 2             |
|                  |           | YQEEVPVYVPK                                                            |                            |        |      | 0.98         | 2.3          | 2             |
| O43424           | GRID2     | Glutamate receptor delta_2 subunit                                     | 2                          | 2      | 3    | 0.88         | 0.61         | 0.78          |
|                  |           | ENVVDFTRR                                                              |                            |        |      | 0.86         | 1.8          | 1             |
|                  |           | NGQCDLYSSVDTKQK                                                        |                            |        |      | 0.90         | 2.2          | 2             |
| O43707           | ACTN4     | Alpha_actinin_4                                                        | 5                          | 7      | 25   | 1.09         | 0.33         | 0.27          |
|                  |           | HRPELIEYDK                                                             |                            |        |      | 1.11         | 3.8          | 3             |
|                  |           | HTNYTMEHIR+Oxidation(5)                                                |                            |        |      | 0.96         | 3.4          | 3             |
|                  |           | KHEAFESDLAAHQDR                                                        |                            |        |      | 1.43         | 3.3          | 3             |
|                  |           | RDHALLEEQSK                                                            |                            |        |      | 1.01         | 3.0          | 3             |
|                  |           | TINEVENQILTR                                                           |                            |        |      | 0.94         | 3.1          | 2             |
| O60282           | KIF5C     | Kinesin heavy chain isoform 5C                                         | 2                          | 2      | 3    | 0.90         | 0.78         | 0.89          |
|                  |           | EHLTRLQDAEEMKK                                                         |                            |        |      | 0.96         | 2.2          | 2             |
|                  |           | IEDQEREMKLEK                                                           |                            |        |      | 0.85         | 2.1          | 2             |
| O60524           | NEMF      | Nuclear export mediator factor NEMF                                    | 2                          | 5      | 6    | 1.00         | 0.23         | 0.69          |

|        |                                                          |    |    |      |      |      |      |
|--------|----------------------------------------------------------|----|----|------|------|------|------|
|        | SALANQIDWTEIGLIVK                                        |    |    | 0.95 | 2.1  | 2    |      |
|        | YPLDHAR                                                  |    |    | 1.03 | 1.9  | 1    |      |
| O75151 | PHF2 Lysine_specific demethylase PHF2                    | 2  | 2  | 2    | 0.94 | 0.41 | 0.79 |
|        | EPPSPIEATPPQSLLEK                                        |    |    | 0.92 | 2.2  | 2    |      |
|        | SDDSSDEGSLHIDTDTKPGR                                     |    |    | 0.98 | 2.2  | 2    |      |
| O75368 | SH3L1 SH3 domain_binding glutamic acid_rich_like protein | 3  | 3  | 31   | 0.95 | 0.34 | 0.98 |
|        | ENVPENSRPATGYLPPQIFNESQYR                                |    |    | 0.99 | 3.6  | 3    |      |
|        | QQDVLGFLEANK                                             |    |    | 0.97 | 2.9  | 2    |      |
|        | VYIASSSGSTAIK                                            |    |    | 0.88 | 3.5  | 2    |      |
| O75874 | IDHC Isocitrate dehydrogenase [NADP] cytoplasmic         | 2  | 2  | 18   | 0.96 | 0.54 | 0.99 |
|        | EAIICKNIPR                                               |    |    | 1.04 | 2.3  | 2    |      |
|        | TVEAEAAHGTVTR                                            |    |    | 0.88 | 3.3  | 2    |      |
| O94782 | UBP1 Ubiquitin carboxyl_terminal hydrolase 1             | 2  | 7  | 54   | 1.01 | 0.29 | 1.00 |
|        | LFQQQLVLR                                                |    |    | 1.00 | 2.9  | 2    |      |
|        | NRLSLKFFQK                                               |    |    | 1.03 | 1.8  | 1    |      |
| O96009 | NAPSA Napsin_A                                           | 4  | 14 | 127  | 0.97 | 0.18 | 1.00 |
|        | FAIQYGTGR                                                |    |    | 1.03 | 3.1  | 2    |      |
|        | GCAAILDGTSLITGPTEEIR                                     |    |    | 0.97 | 6.6  | 2    |      |
|        | VDGILSEDKLTIGGIK                                         |    |    | 0.95 | 3.2  | 3    |      |
|        | VGPGLTCAK                                                |    |    | 0.96 | 3.0  | 2    |      |
| P00338 | LDHA L_lactate dehydrogenase A chain                     | 2  | 2  | 5    | 0.93 | 0.60 | 0.96 |
|        | LVIIITAGAR                                               |    |    | 0.95 | 2.3  | 2    |      |
|        | QVVESAYEVIK                                              |    |    | 0.90 | 2.8  | 2    |      |
| P00352 | AL1A1 Retinal dehydrogenase 1                            | 10 | 21 | 118  | 0.93 | 0.16 | 0.98 |
|        | ANNTFYGLSAGVFTK                                          |    |    | 0.98 | 4.9  | 2    |      |
|        | EAGFPPGVVNIIVPGYPTAGAAISSHMDIDK                          |    |    | 0.92 | 3.4  | 3    |      |
|        | EEIFGPVQQIMK                                             |    |    | 0.94 | 3.2  | 2    |      |
|        | ELGEYGFHEYTEVK                                           |    |    | 0.88 | 3.5  | 2    |      |
|        | GYFVQPTVFSNVTDEMR                                        |    |    | 0.90 | 3.1  | 2    |      |
|        | GYFVQPTVFSNVTDEMR+Oxidation(15)                          |    |    | 0.99 | 4.5  | 2    |      |
|        | KFPVFNPAEEELCQVEEGDKEDVDK                                |    |    | 0.83 | 4.4  | 4    |      |
|        | LYSNAYLNLAGCIK                                           |    |    | 0.85 | 4.6  | 2    |      |
|        | YILGNPLTPGVTQGPQIDK                                      |    |    | 1.09 | 3.9  | 2    |      |
|        | YILGNPLTPGVTQGPQIDKEQYDK                                 |    |    | 0.84 | 3.5  | 2    |      |
| P00390 | GSHR Glutathione reductase_mitochondrial                 | 3  | 3  | 7    | 0.92 | 0.29 | 0.87 |
|        | CVMKMVCANKEEK+Oxidation(2)                               |    |    | 0.87 | 2.8  | 2    |      |
|        | CVMKMVCANKEEK+Oxidation(4)                               |    |    | 0.87 | 2.7  | 2    |      |
|        | MALLPRALSAGAGPSWR+Oxidation(0)                           |    |    | 1.04 | 2.1  | 2    |      |
| P00450 | CERU Ceruloplasmin                                       | 23 | 65 | 445  | 0.96 | 0.09 | 1.00 |
|        | AEEEEHLGILGPQLHADVGDK                                    |    |    | 1.04 | 4.4  | 3    |      |
|        | ALYLQYTDETFR                                             |    |    | 0.90 | 4.2  | 2    |      |
|        | DIASGLIGPLIICK                                           |    |    | 0.93 | 3.5  | 2    |      |
|        | DIFTGLIGPMK                                              |    |    | 0.80 | 2.2  | 2    |      |
|        | DLYSGLIGPLIVCR                                           |    |    | 0.97 | 3.3  | 2    |      |
|        | ERGPEEEHLGILGPVIWAEVGDITIR                               |    |    | 0.89 | 4.3  | 3    |      |
|        | EVGPTNADPVCLAK                                           |    |    | 0.97 | 3.0  | 2    |      |
|        | GAYPLSIEPIGVR                                            |    |    | 0.97 | 3.7  | 2    |      |
|        | GPEEEHLGILGPVIWAEVGDITIR                                 |    |    | 0.85 | 5.2  | 3    |      |
|        | HYYIGIIEETWDYASDHGEK                                     |    |    | 1.03 | 6.7  | 3    |      |
|        | IYHSHIDAPK                                               |    |    | 0.95 | 3.6  | 3    |      |
|        | KAEEEEHLGILGPQLHADVGDK                                   |    |    | 0.95 | 6.2  | 3    |      |
|        | KLISVDTEHSNIYLQNGPDR                                     |    |    | 1.05 | 5.2  | 3    |      |
|        | LISVDTEHSNIYLQNGPDR                                      |    |    | 0.96 | 4.4  | 3    |      |
|        | MFTTAPDQVDEDEDFQESNK+Oxidation(0)                        |    |    | 0.94 | 4.7  | 3    |      |
|        | MYSAVDPTK+Oxidation(0)                                   |    |    | 0.99 | 2.5  | 2    |      |
|        | NLASRPYTFHSHGITYYK                                       |    |    | 1.09 | 3.8  | 3    |      |
|        | NNEGTYYSPTYNPQSR                                         |    |    | 0.98 | 4.5  | 2    |      |
|        | QSEDSTFYLGGER                                            |    |    | 0.92 | 3.3  | 2    |      |
|        | TTIEKPVWLGLFLGPIIK                                       |    |    | 0.94 | 3.8  | 2    |      |
|        | TYCSEPEKVDKDNEDFQESNR                                    |    |    | 0.86 | 4.4  | 3    |      |
|        | VDKDNEDFQESNR                                            |    |    | 0.98 | 3.4  | 3    |      |
|        | VNKDDEEFIESNK                                            |    |    | 0.87 | 4.1  | 2    |      |
| P00558 | PGK1 Phosphoglycerate kinase 1                           | 7  | 16 | 66   | 0.97 | 0.18 | 1.00 |
|        | ACANPAAGSVILLENLR                                        |    |    | 0.80 | 3.7  | 2    |      |
|        | ALESPERPFLAILGGAK                                        |    |    | 0.96 | 4.1  | 3    |      |
|        | GCITIIGGGDTATCCA                                         |    |    | 0.99 | 4.4  | 2    |      |
|        | ITLPVDFVTADK                                             |    |    | 0.97 | 2.5  | 2    |      |

|        |                                    |    |    |      |      |      |      |
|--------|------------------------------------|----|----|------|------|------|------|
|        | ITLPVDFVTADKFDENAK                 |    |    | 0.96 | 3.8  | 2    |      |
|        | VLPGVDAISNI                        |    |    | 0.97 | 2.2  | 2    |      |
|        | YSLEPVAVELK                        |    |    | 1.01 | 2.8  | 2    |      |
| P00568 | KAD1 Adenylate kinase isoenzyme 1  | 2  | 2  | 6    | 0.95 | 0.41 | 0.96 |
|        | EVQQGEEFER                         |    |    | 0.92 | 2.7  | 2    |      |
|        | YGYTHLSTGDLLR                      |    |    | 0.97 | 2.3  | 2    |      |
| P00734 | THRB Prothrombin                   | 13 | 25 | 98   | 0.94 | 0.13 | 0.71 |
|        | DKLAACLEGNAEGLGTNYR                |    |    | 0.97 | 4.8  | 2    |      |
|        | ELLESYIDGR                         |    |    | 0.85 | 2.8  | 2    |      |
|        | ETAASLLQAGYK                       |    |    | 1.03 | 2.8  | 2    |      |
|        | GQPSVLQVVNLPIVERPVCK               |    |    | 0.96 | 3.4  | 2    |      |
|        | HQDFNSAVQLVENFCR                   |    |    | 0.80 | 3.0  | 3    |      |
|        | KSPQELLCGASLISDR                   |    |    | 1.06 | 3.0  | 2    |      |
|        | LAACLEGNAEGLGTNYR                  |    |    | 0.85 | 4.4  | 2    |      |
|        | NPDSSTTGPWCYTDDPTVR                |    |    | 0.78 | 3.4  | 2    |      |
|        | RQECSIPVCGQDQVTVAMTPR              |    |    | 0.93 | 4.0  | 3    |      |
|        | SEGSSVNLSPPLEQCVDR                 |    |    | 1.00 | 4.0  | 2    |      |
|        | TATSEYQTFNPR                       |    |    | 0.82 | 3.4  | 2    |      |
|        | TFGSGEADCGLRPLFEK                  |    |    | 1.05 | 4.0  | 2    |      |
|        | YTACETAR                           |    |    | 0.87 | 2.5  | 2    |      |
| P00738 | HPT Haptoglobin                    | 22 | 63 | 601  | 0.98 | 0.09 | 1.00 |
|        | AVGDKLPECEADDGCPKPPEIAHGYVEHSVR    |    |    | 1.05 | 6.4  | 4    |      |
|        | AVGDKLPECEAVCGKPK                  |    |    | 1.17 | 4.4  | 3    |      |
|        | DIAPTLTLVVGK                       |    |    | 0.48 | 2.7  | 2    |      |
|        | DYAEVGR                            |    |    | 0.83 | 2.2  | 2    |      |
|        | GSFPWQAK                           |    |    | 1.04 | 2.9  | 2    |      |
|        | HYEGSTVPEK                         |    |    | 1.05 | 2.8  | 2    |      |
|        | ILGGHLDK                           |    |    | 0.94 | 3.0  | 2    |      |
|        | LPECEADDGCPKPPEIAHGYVEHSVR         |    |    | 1.03 | 4.6  | 4    |      |
|        | LRTEGDGVYTLNDK                     |    |    | 0.96 | 4.2  | 2    |      |
|        | LRTEGDGVYTLNDKK                    |    |    | 1.00 | 4.8  | 2    |      |
|        | LRTEGDGVYTLNNEK                    |    |    | 1.00 | 4.8  | 2    |      |
|        | SCAVAEYGVYVK                       |    |    | 0.95 | 4.4  | 2    |      |
|        | SPVGVQPILNEHTFCAGMSK               |    |    | 0.88 | 3.5  | 2    |      |
|        | SPVGVQPILNEHTFCAGMSK+Oxidation(17) |    |    | 1.00 | 4.0  | 2    |      |
|        | TEGDGVYTLNDK                       |    |    | 0.92 | 3.9  | 2    |      |
|        | TEGDGVYTLNDKK                      |    |    | 0.91 | 3.7  | 2    |      |
|        | TEGDGVYTLNNEK                      |    |    | 0.92 | 3.7  | 2    |      |
|        | VGYVSGWGR                          |    |    | 1.00 | 3.4  | 2    |      |
|        | VTSIQDWVQK                         |    |    | 1.02 | 3.8  | 2    |      |
|        | VVLHPNYSQVDIGLIK                   |    |    | 0.89 | 5.0  | 3    |      |
|        | YVMLPVADQDQCIR                     |    |    | 0.94 | 3.5  | 2    |      |
|        | YVMLPVADQDQCIR+Oxidation(2)        |    |    | 1.01 | 4.9  | 2    |      |
| P00746 | CFAD Complement factor D           | 5  | 10 | 33   | 0.95 | 0.19 | 1.00 |
|        | DCKGDSGGPLVCGGVLEGVVTSGSR          |    |    | 0.95 | 4.2  | 3    |      |
|        | GDSGGPLVCGGVLEGVVTSGSR             |    |    | 0.98 | 5.2  | 2    |      |
|        | RPDSLQHVLLPVLDLDR                  |    |    | 0.94 | 3.3  | 3    |      |
|        | VDRDVAPGTLCDVAGWGIVNHAGR           |    |    | 0.91 | 5.1  | 3    |      |
|        | VQVLLGAHSLSQPEPSKR                 |    |    | 0.97 | 4.1  | 3    |      |
| P00747 | PLMN Plasminogen                   | 6  | 11 | 44   | 0.95 | 0.22 | 1.00 |
|        | FSPATHPSEGLEENYCR                  |    |    | 1.08 | 4.0  | 2    |      |
|        | HSIFTPETNPR                        |    |    | 0.98 | 2.7  | 2    |      |
|        | QLGAGSIEECAAK                      |    |    | 1.00 | 3.0  | 2    |      |
|        | TECFITGWGETQGTFGAGLLK              |    |    | 0.91 | 4.9  | 2    |      |
|        | VILGAHQEVNLEPHVQEIEVSR             |    |    | 0.87 | 4.6  | 3    |      |
|        | VQSTELCAGHLAGGTDSCQGDSSGGPLVCFEK   |    |    | 0.93 | 3.8  | 3    |      |
| P00751 | CFAB Complement factor B           | 15 | 30 | 192  | 0.97 | 0.13 | 1.00 |
|        | ALFVSEEEKK                         |    |    | 0.91 | 2.6  | 2    |      |
|        | CLVNLIEK                           |    |    | 0.91 | 2.3  | 2    |      |
|        | DAQYAPGYDK                         |    |    | 1.11 | 2.3  | 2    |      |
|        | DISEVTPR                           |    |    | 1.00 | 2.2  | 2    |      |
|        | EKLQDEDLGFL                        |    |    | 0.92 | 3.6  | 2    |      |
|        | FIQVGVISWGVVDVCK                   |    |    | 1.10 | 2.7  | 2    |      |
|        | FLCTGGVSPYADPNTCR                  |    |    | 1.00 | 4.1  | 2    |      |
|        | LEDSTVYHCSR                        |    |    | 1.11 | 3.7  | 2    |      |
|        | LLQEGQALEYVCPSPGFYPYVQTR           |    |    | 0.88 | 4.5  | 3    |      |
|        | LPPTTTCQQQK                        |    |    | 0.96 | 2.1  | 2    |      |

|        |                                                   |    |     |      |      |      |      |
|--------|---------------------------------------------------|----|-----|------|------|------|------|
|        | VKDISEVVTPR                                       |    |     | 1.14 | 2.5  | 2    |      |
|        | VSEADSSNADWVTK                                    |    |     | 0.93 | 4.7  | 2    |      |
|        | WSGQTAICDNGAGYCSNPGIPIGTR                         |    |     | 0.93 | 4.6  | 3    |      |
|        | YGLVTYATYPK                                       |    |     | 0.84 | 4.0  | 2    |      |
|        | YGQTIRPICLPCTEGTTR                                |    |     | 0.96 | 3.9  | 3    |      |
| P00915 | CAH1 Carbonic anhydrase 1                         | 4  | 5   | 23   | 0.97 | 0.30 | 1.00 |
|        | ADGLAVIGVLMK                                      |    |     | 0.92 | 3.5  | 2    |      |
|        | ADGLAVIGVLMKVGEANPK                               |    |     | 0.98 | 1.9  | 1    |      |
|        | LYPIANGNNQSPVDIK                                  |    |     | 0.92 | 3.5  | 2    |      |
|        | VLDALQAIK                                         |    |     | 1.05 | 2.6  | 2    |      |
| P00918 | CAH2 Carbonic anhydrase 2                         | 2  | 4   | 26   | 0.92 | 0.30 | 1.00 |
|        | AVQQPDGLAVLGIFLK                                  |    |     | 0.84 | 3.8  | 2    |      |
|        | YDPSLKPLSVSYDQATSLR                               |    |     | 0.95 | 4.0  | 3    |      |
| P01008 | ANT3 Antithrombin_III                             | 12 | 38  | 232  | 0.96 | 0.13 | 1.00 |
|        | ADGESCSASMMYQEGK+Oxidation(10)                    |    |     | 0.77 | 4.0  | 2    |      |
|        | ADGESCSASMMYQEGK+Oxidation(9)                     |    |     | 0.77 | 4.2  | 2    |      |
|        | ADGESCSASMMYQEGK+Oxidation(9),Oxidation(10)       |    |     | 1.01 | 4.4  | 2    |      |
|        | AFLEVNEEGSEAAASTAVVIAGR                           |    |     | 1.03 | 6.8  | 2    |      |
|        | ATEDEGSEQKIPEATNR                                 |    |     | 0.76 | 4.2  | 2    |      |
|        | DDLVSDFAHK                                        |    |     | 0.89 | 3.0  | 2    |      |
|        | FATTFYQHLADSK                                     |    |     | 0.95 | 3.8  | 2    |      |
|        | FRIEDGFSLK                                        |    |     | 0.88 | 3.8  | 3    |      |
|        | NDNDNIFLSPLSISTAFAMTK+Oxidation(18)               |    |     | 0.96 | 3.4  | 3    |      |
|        | SKLPGIVAEGR                                       |    |     | 1.10 | 2.6  | 2    |      |
|        | TSDQIHFFFAK                                       |    |     | 0.88 | 3.6  | 2    |      |
|        | VAEGTQVLELPFK                                     |    |     | 0.97 | 3.7  | 2    |      |
| P01009 | A1AT Alpha_1_antitrypsin                          | 31 | 184 | 1878 | 0.95 | 0.05 | 1.00 |
|        | AVLTIDEK                                          |    |     | 1.06 | 2.9  | 2    |      |
|        | DTEEDDFHVDQVTTVK                                  |    |     | 0.96 | 5.5  | 2    |      |
|        | FLEDVK                                            |    |     | 0.88 | 2.2  | 2    |      |
|        | FLEDVKK                                           |    |     | 0.97 | 2.6  | 2    |      |
|        | FLENEDR                                           |    |     | 0.90 | 2.4  | 2    |      |
|        | GKWERPFEVK                                        |    |     | 1.07 | 3.4  | 2    |      |
|        | GTEAAGAMFLEAIPMSIPPEVK+Oxidation(7)               |    |     | 0.88 | 3.1  | 2    |      |
|        | GTEAAGAMFLEAIPMSIPPEVK+Oxidation(7),Oxidation(14) |    |     | 0.89 | 3.2  | 2    |      |
|        | ITPNLAEFASLYR                                     |    |     | 0.46 | 3.3  | 2    |      |
|        | KLSSWVLLMK                                        |    |     | 0.70 | 2.6  | 2    |      |
|        | KLSSWVLLMK+Oxidation(8)                           |    |     | 0.79 | 2.9  | 2    |      |
|        | KLYHSEFTVNFVDTEEAK                                |    |     | 0.94 | 5.9  | 2    |      |
|        | KLYHSEFTVNFVDTEEAKK                               |    |     | 0.97 | 5.8  | 3    |      |
|        | KQINDYVEK                                         |    |     | 1.09 | 2.9  | 2    |      |
|        | LGMFNIQHCK+Oxidation(2)                           |    |     | 0.92 | 3.7  | 3    |      |
|        | LQHLENELTHDIITK                                   |    |     | 0.94 | 5.2  | 2    |      |
|        | LSITGTYDLK                                        |    |     | 0.89 | 3.2  | 2    |      |
|        | LSSWVLLMK                                         |    |     | 0.28 | 2.7  | 2    |      |
|        | LSSWVLLMK+Oxidation(7)                            |    |     | 0.59 | 2.7  | 2    |      |
|        | LYHSEFTVNFVDTEEAK                                 |    |     | 0.88 | 4.8  | 2    |      |
|        | LYHSEFTVNFVDTEEAKK                                |    |     | 0.91 | 6.2  | 2    |      |
|        | QINDYVEK                                          |    |     | 0.91 | 2.2  | 2    |      |
|        | RSASLHLPK                                         |    |     | 1.09 | 3.1  | 3    |      |
|        | SASLHLPK                                          |    |     | 0.99 | 2.7  | 2    |      |
|        | SVLGQLGITK                                        |    |     | 0.90 | 3.7  | 2    |      |
|        | TDTSHHDQDHPTFNK                                   |    |     | 1.03 | 4.3  | 2    |      |
|        | TLNQPDSQLQLTTGNGLFLSEGLK                          |    |     | 0.92 | 6.3  | 3    |      |
|        | VFSNGADLSGVTEEAPLK                                |    |     | 0.98 | 6.2  | 2    |      |
|        | VVNPTQK                                           |    |     | 1.04 | 2.4  | 2    |      |
|        | WERPFEVK                                          |    |     | 1.15 | 2.6  | 2    |      |
|        | WERPFEVKDTEEDFHVDQVTTVK                           |    |     | 0.83 | 4.2  | 4    |      |
| P01011 | AACT Alpha_1_antichymotrypsin                     | 9  | 28  | 217  | 0.95 | 0.14 | 1.00 |
|        | ADLSGITGAR                                        |    |     | 0.87 | 3.5  | 2    |      |
|        | AVLDVFEEGTEASAATAVK                               |    |     | 0.95 | 6.3  | 2    |      |
|        | DEELSCVVVELK                                      |    |     | 0.91 | 4.3  | 2    |      |
|        | EIGELYLPK                                         |    |     | 1.05 | 2.5  | 2    |      |
|        | ITLLSALVETR                                       |    |     | 0.94 | 4.6  | 2    |      |
|        | KLINDYVK                                          |    |     | 0.97 | 2.4  | 2    |      |
|        | LYGSEAFATDFQDSAAAK                                |    |     | 0.90 | 5.7  | 2    |      |
|        | NLAVSQVVHK                                        |    |     | 0.91 | 3.0  | 2    |      |

|        |                                  |    |     |      |      |      |      |
|--------|----------------------------------|----|-----|------|------|------|------|
|        | WRDSLEFR                         |    |     | 1.07 | 2.4  | 2    |      |
| P01019 | ANGT Angiotensinogen             | 5  | 13  | 106  | 0.94 | 0.21 | 1.00 |
|        | ADSQAQLLLSTVVGFTAPGLHLK          |    |     | 0.94 | 4.1  | 3    |      |
|        | ALQDQLVLAALK                     |    |     | 0.86 | 3.9  | 2    |      |
|        | DPTFIPAPIQAK                     |    |     | 1.06 | 2.7  | 2    |      |
|        | SLDFTELDVAAEK                    |    |     | 0.99 | 3.0  | 2    |      |
|        | VLSALQAVQGLLVAQGR                |    |     | 0.88 | 4.5  | 3    |      |
| P01023 | A2MG Alpha_2_macrolobulin        | 32 | 73  | 599  | 0.94 | 0.08 | 1.00 |
|        | AAQVTIQSSGTFSSK                  |    |     | 0.91 | 4.9  | 2    |      |
|        | AIGYLNTGYQR                      |    |     | 0.95 | 3.1  | 2    |      |
|        | ALLAYAFALAGNQDK                  |    |     | 0.85 | 3.6  | 2    |      |
|        | DTVIKPLLVEPEGLEK                 |    |     | 1.03 | 3.9  | 3    |      |
|        | ETTFNSLLCPSGGEVSEELSLK           |    |     | 0.95 | 4.9  | 2    |      |
|        | FEVQVTVPK                        |    |     | 0.93 | 3.1  | 2    |      |
|        | FSGQLNSHGCFYQQVK                 |    |     | 0.86 | 4.5  | 2    |      |
|        | GHFSISIPVK                       |    |     | 1.26 | 2.0  | 1    |      |
|        | HNVYINGITYTPVSSSTNEK             |    |     | 1.01 | 5.8  | 2    |      |
|        | HYDGSYSTFGER                     |    |     | 1.03 | 3.1  | 2    |      |
|        | IAQWQSFQLEGGK                    |    |     | 0.90 | 3.7  | 2    |      |
|        | KDTVIKPLLVEPEGLEK                |    |     | 0.92 | 3.7  | 3    |      |
|        | KYSDASDCHGEDSQAFCEK              |    |     | 1.00 | 4.2  | 3    |      |
|        | LHTEAQIQEEGTVVELTGR              |    |     | 0.97 | 6.4  | 2    |      |
|        | LLIYAVLPTGDVIGDSAK               |    |     | 0.90 | 4.4  | 2    |      |
|        | LLLQQVSLPELPGEYSMK               |    |     | 0.99 | 3.7  | 2    |      |
|        | LLLQQVSLPELPGEYSMK+Oxidation(16) |    |     | 0.81 | 3.4  | 2    |      |
|        | LPPNVVEESAR                      |    |     | 0.91 | 2.8  | 2    |      |
|        | LVHVEPHTETVR                     |    |     | 0.97 | 3.3  | 3    |      |
|        | NEDSLVFVQTDK                     |    |     | 0.89 | 3.5  | 2    |      |
|        | QFSFPLSSEPFQGSYK                 |    |     | 0.96 | 4.1  | 2    |      |
|        | QGIPFFGQVR                       |    |     | 0.93 | 2.6  | 2    |      |
|        | QQNAQGGFSSTQDTVVALHALSK          |    |     | 0.89 | 4.1  | 3    |      |
|        | QTVSWAVTPK                       |    |     | 0.95 | 2.4  | 2    |      |
|        | TEVSSNHVLIYLDK                   |    |     | 0.89 | 4.6  | 2    |      |
|        | VSVQLEASPAFLAVPVEK               |    |     | 0.91 | 4.8  | 2    |      |
|        | VTAAPQSVCALR                     |    |     | 1.00 | 2.4  | 2    |      |
|        | VTGEGCVYLQTSK                    |    |     | 0.89 | 3.7  | 2    |      |
|        | VVSMDFHPLNELIPLVYIQDPK           |    |     | 0.69 | 3.9  | 3    |      |
|        | YDVENCLANK                       |    |     | 0.92 | 2.8  | 2    |      |
|        | YNILPEKEEFPFALGVQTLPTCDEPK       |    |     | 0.86 | 5.3  | 3    |      |
|        | YSDASDCHGEDSQAFCEK               |    |     | 0.87 | 4.2  | 3    |      |
| P01024 | CO3 Complement C3                | 69 | 248 | 2193 | 0.97 | 0.04 | 1.00 |
|        | AAVYHHFISDGVR                    |    |     | 1.05 | 4.0  | 2    |      |
|        | ACEPGVDYVYK                      |    |     | 1.05 | 3.6  | 2    |      |
|        | ADIGCTPGSGK                      |    |     | 1.01 | 3.3  | 2    |      |
|        | AGDFLEANYMNLQR                   |    |     | 0.76 | 3.1  | 2    |      |
|        | AGDFLEANYMNLQR+Oxidation(9)      |    |     | 0.83 | 3.7  | 2    |      |
|        | AYYENSPQQVFSTEFVK                |    |     | 0.50 | 4.9  | 2    |      |
|        | CAEENCFIQK                       |    |     | 0.92 | 3.3  | 2    |      |
|        | DAPDHQELNLDVSLQLPSR              |    |     | 0.98 | 5.1  | 2    |      |
|        | DFDFVPPVVR                       |    |     | 1.03 | 3.3  | 2    |      |
|        | DICEEQVNSLPGSITK                 |    |     | 0.99 | 4.3  | 2    |      |
|        | DSCVGSLLVK                       |    |     | 0.91 | 2.4  | 2    |      |
|        | DTWVEHWPEEDECQDEENQK             |    |     | 0.85 | 6.5  | 3    |      |
|        | DYAGVFS DAGLTFTSSSGQQAQR         |    |     | 1.07 | 6.0  | 2    |      |
|        | EDIPPADLSDQVPDTESETR             |    |     | 1.00 | 5.3  | 2    |      |
|        | EGVQKEDIPPADLSDQVPDTESETR        |    |     | 0.99 | 5.2  | 3    |      |
|        | ENEGFTVTAEGK                     |    |     | 1.00 | 3.5  | 2    |      |
|        | EVVADSVWVDVK                     |    |     | 0.98 | 4.5  | 2    |      |
|        | EYVLPSEFVIVEPTEK                 |    |     | 0.54 | 3.5  | 2    |      |
|        | FVTVQATFGTQVVEK                  |    |     | 0.95 | 5.2  | 2    |      |
|        | FYHPEKEDGK                       |    |     | 0.84 | 2.8  | 2    |      |
|        | FYYIYNEK                         |    |     | 0.95 | 2.2  | 2    |      |
|        | GLEVTITAR                        |    |     | 0.96 | 3.2  | 2    |      |
|        | GQGTLVVVTMYHAK                   |    |     | 0.99 | 2.9  | 2    |      |
|        | GQGTLVVVTMYHAK+Oxidation(9)      |    |     | 1.02 | 3.1  | 2    |      |
|        | GYTQLAFR                         |    |     | 1.00 | 3.0  | 2    |      |
|        | IHWESASLLR                       |    |     | 0.93 | 3.2  | 3    |      |

|        |                                             |    |    |     |      |      |      |
|--------|---------------------------------------------|----|----|-----|------|------|------|
|        | ILLQGTPVAQMTEDAVER                          |    |    |     | 0.94 | 5.9  | 2    |
|        | ILLQGTPVAQMTEDAVER+Oxidation(10)            |    |    |     | 0.94 | 5.2  | 2    |
|        | IPIEDGSGEVVLSR                              |    |    |     | 0.94 | 3.9  | 2    |
|        | IWDVVEK                                     |    |    |     | 1.02 | 2.3  | 2    |
|        | KGYTQQLAFR                                  |    |    |     | 1.00 | 3.9  | 3    |
|        | KQELSEAEQATR                                |    |    |     | 0.96 | 4.0  | 3    |
|        | KVEGTAFVIFGIQDGEQR                          |    |    |     | 1.12 | 4.9  | 2    |
|        | KVLLDGVQNP                                  |    |    |     | 1.16 | 3.0  | 2    |
|        | LESEETMVLEAHDAQGDVPVTVTVHDFPGK              |    |    |     | 1.00 | 5.2  | 3    |
|        | LESEETMVLEAHDAQGDVPVTVTVHDFPGK+Oxidation(6) |    |    |     | 0.94 | 4.9  | 4    |
|        | LSINTHPSQKPLSITVR                           |    |    |     | 0.94 | 4.8  | 3    |
|        | NLIIYLDK                                    |    |    |     | 0.92 | 2.8  | 2    |
|        | QELSEAEQATR                                 |    |    |     | 0.99 | 3.2  | 2    |
|        | RIPIEDGSGEVVLSR                             |    |    |     | 0.89 | 4.3  | 2    |
|        | RQGALELIK                                   |    |    |     | 0.96 | 2.2  | 2    |
|        | SDDKVTLEER                                  |    |    |     | 1.07 | 3.7  | 3    |
|        | SEETKENEFTVTAEGK                            |    |    |     | 1.00 | 5.2  | 3    |
|        | SGIPIVTSPIYQIHFTK                           |    |    |     | 0.92 | 4.5  | 2    |
|        | SGSDEVQVGGQR                                |    |    |     | 1.03 | 4.2  | 2    |
|        | SLYVSATVILHSGSDMVQAER                       |    |    |     | 1.03 | 5.6  | 2    |
|        | SLYVSATVILHSGSDMVQAER+Oxidation(15)         |    |    |     | 1.05 | 4.5  | 3    |
|        | SNLDEDIAEENIVSR                             |    |    |     | 0.94 | 5.2  | 2    |
|        | SSLSVPYVIVPLK                               |    |    |     | 0.97 | 3.4  | 2    |
|        | SYTVAIAGYALAMGR                             |    |    |     | 1.12 | 4.2  | 2    |
|        | SYTVAIAGYALAMGR+Oxidation(13)               |    |    |     | 0.98 | 3.0  | 2    |
|        | TELRPGETLNVNLLR                             |    |    |     | 0.98 | 5.8  | 3    |
|        | TFISPIK                                     |    |    |     | 0.83 | 2.2  | 2    |
|        | TGLQEVEVK                                   |    |    |     | 0.92 | 3.3  | 2    |
|        | TIYTPGSTVLYR                                |    |    |     | 0.97 | 3.0  | 2    |
|        | TKKQELSEAEQATR                              |    |    |     | 0.85 | 3.6  | 3    |
|        | TMQALPYSTVGNSSNYLHLSVLR+Oxidation(1)        |    |    |     | 0.95 | 3.2  | 3    |
|        | TVMVNIENPEGIPVK                             |    |    |     | 0.97 | 3.6  | 2    |
|        | TVMVNIENPEGIPVK+Oxidation(2)                |    |    |     | 0.98 | 4.2  | 2    |
|        | VELLHNPAFCSLATTK                            |    |    |     | 0.95 | 5.1  | 3    |
|        | VFLDCCNYITELR                               |    |    |     | 0.96 | 3.7  | 2    |
|        | VHQYFNVELIQPGAVK                            |    |    |     | 0.90 | 4.5  | 2    |
|        | VLLDGVQNP                                   |    |    |     | 0.97 | 3.2  | 2    |
|        | VPVAVQGEDTVQSLTQGDGVAK                      |    |    |     | 1.02 | 6.2  | 2    |
|        | VRVELLHNPAFCSLATTK                          |    |    |     | 0.86 | 4.1  | 3    |
|        | VSHSEDDCLAFK                                |    |    |     | 0.87 | 3.6  | 3    |
|        | VTIKPAPETEK                                 |    |    |     | 0.93 | 2.4  | 2    |
|        | VVLVAVDK                                    |    |    |     | 1.04 | 2.5  | 2    |
|        | VYAYNLEESCTR                                |    |    |     | 0.41 | 4.2  | 2    |
| P01031 | CO5 Complement C5                           | 5  | 9  | 29  | 0.94 | 0.21 | 0.93 |
|        | FQNSAILTIQPK                                |    |    |     | 0.94 | 3.4  | 2    |
|        | LHMKTLLPVSKPEIR+Oxidation(2)                |    |    |     | 1.01 | 2.5  | 2    |
|        | LNLVATPLFLKPGIPYPIK                         |    |    |     | 0.85 | 3.2  | 3    |
|        | TDAPDLPEENQAR                               |    |    |     | 0.98 | 2.8  | 2    |
|        | VFQFLEK                                     |    |    |     | 0.92 | 2.2  | 2    |
| P01034 | CYTC Cystatin_C                             | 2  | 3  | 23  | 1.13 | 0.39 | 0.46 |
|        | ALDFAVGEYNK                                 |    |    |     | 1.02 | 3.0  | 2    |
|        | LVGPMMDASVEEEGVR+Oxidation(5)               |    |    |     | 1.39 | 2.5  | 2    |
| P01042 | KNG1 Kininogen_1                            | 10 | 17 | 133 | 0.98 | 0.20 | 1.00 |
|        | AATGECTATVGK                                |    |    |     | 0.91 | 3.2  | 2    |
|        | DAAKAATGECTATVGK                            |    |    |     | 1.07 | 2.2  | 2    |
|        | DIPTNSPELEETLHTITK                          |    |    |     | 0.99 | 4.0  | 2    |
|        | ENFLFLTPDCK                                 |    |    |     | 0.87 | 3.8  | 2    |
|        | ESNEELTESCETK                               |    |    |     | 1.08 | 3.7  | 2    |
|        | IASFSQNCDIYPGK                              |    |    |     | 0.96 | 3.2  | 2    |
|        | LGQSLDCNAEVYVWPWEK                          |    |    |     | 0.94 | 4.8  | 2    |
|        | SLWNGDTGECTDNAYIDIQLR                       |    |    |     | 1.06 | 4.4  | 2    |
|        | TVGSDTFYSEK                                 |    |    |     | 0.81 | 3.0  | 2    |
|        | YNSQNQSNNQFVLYR                             |    |    |     | 1.01 | 4.1  | 2    |
| P01591 | IGJ Immunoglobulin J chain                  | 5  | 11 | 73  | 0.95 | 0.23 | 1.00 |
|        | CYTAVVPLVYGGETK                             |    |    |     | 0.93 | 4.3  | 2    |
|        | FVYHLSDLCK                                  |    |    |     | 0.92 | 2.8  | 2    |
|        | IVLVDNK                                     |    |    |     | 1.03 | 2.0  | 1    |

|        |                                        |    |     |      |      |      |      |
|--------|----------------------------------------|----|-----|------|------|------|------|
|        | KCDPTEVELDNQIVTATQSNICDEDSATETCYTYDR   |    |     | 1.00 | 6.5  | 3    |      |
|        | SSEDPNEDIVER                           |    |     | 0.95 | 3.3  | 2    |      |
| P01598 | KV106 Ig kappa chain V_I region EU     | 3  | 34  | 306  | 0.93 | 0.11 | 0.80 |
|        | ASSLESGVPSR                            |    |     | 0.86 | 2.2  | 2    |      |
|        | DIQMTQSPSTLSASVGDR                     |    |     | 0.93 | 5.3  | 2    |      |
|        | DIQMTQSPSTLSASVGDR+Oxidation(3)        |    |     | 0.95 | 5.4  | 2    |      |
| P01611 | KV119 Ig kappa chain V_I region Wes    | 3  | 17  | 94   | 0.95 | 0.19 | 0.95 |
|        | DIQMTQSPSSVSASVGDR                     |    |     | 0.99 | 5.0  | 2    |      |
|        | DIQMTQSPSSVSASVGDR+Oxidation(3)        |    |     | 0.96 | 5.0  | 2    |      |
|        | LLIYSASLENGVPSR                        |    |     | 0.89 | 2.2  | 2    |      |
| P01613 | KV121 Ig kappa chain V_I region Ni     | 3  | 32  | 323  | 0.95 | 0.12 | 1.00 |
|        | DIQMTQSPSSLSATVGDR                     |    |     | 0.93 | 4.0  | 2    |      |
|        | DIQMTQSPSSLSATVGDR+Oxidation(3)        |    |     | 0.95 | 4.6  | 2    |      |
|        | LLIYDASNLETGVPSR                       |    |     | 0.98 | 3.8  | 2    |      |
| P01767 | HV306 Ig heavy chain V_III region BUT  | 2  | 12  | 66   | 0.95 | 0.23 | 0.95 |
|        | AEDTAVYYCAR                            |    |     | 0.84 | 4.1  | 2    |      |
|        | EVQLVETGGGLIQPGGSLR                    |    |     | 1.01 | 3.7  | 2    |      |
| P01779 | HV318 Ig heavy chain V_III region TUR  | 2  | 16  | 112  | 0.96 | 0.14 | 0.97 |
|        | EVQLLESGGLVQPGGSLR                     |    |     | 0.98 | 6.4  | 2    |      |
|        | LSCAASGFTFSR                           |    |     | 0.88 | 2.9  | 2    |      |
| P01781 | HV320 Ig heavy chain V_III region GAL  | 2  | 3   | 29   | 0.91 | 0.42 | 0.95 |
|        | GLEWVANIK                              |    |     | 0.91 | 3.3  | 2    |      |
|        | VEDTALYYCAR                            |    |     | 0.90 | 2.6  | 2    |      |
| P01833 | PIGR Polymeric immunoglobulin receptor | 24 | 91  | 1105 | 0.96 | 0.07 | 1.00 |
|        | ADEGWYWCVK                             |    |     | 0.95 | 4.2  | 2    |      |
|        | AFVNCDENSR                             |    |     | 0.94 | 3.3  | 2    |      |
|        | ASVDSGSSEEQGGSSR                       |    |     | 0.87 | 4.7  | 2    |      |
|        | CGLGINSR                               |    |     | 0.85 | 2.1  | 2    |      |
|        | CPLLVDSEGWVK                           |    |     | 0.85 | 2.6  | 2    |      |
|        | DAGFYWCLTNGDTLWR                       |    |     | 0.89 | 4.5  | 2    |      |
|        | DGSFVITGLR                             |    |     | 0.93 | 4.6  | 2    |      |
|        | GGCITLISSEGYVSSK                       |    |     | 0.90 | 5.6  | 2    |      |
|        | GSVTFHCALGPEVANVAK                     |    |     | 0.97 | 5.7  | 2    |      |
|        | GVAGGSVAVLCPYNR                        |    |     | 1.00 | 3.8  | 2    |      |
|        | IIEGEPNLK                              |    |     | 0.95 | 3.0  | 2    |      |
|        | ILLNPQDK                               |    |     | 0.93 | 2.7  | 2    |      |
|        | ILLNPQDKDGSFVITGLR                     |    |     | 0.94 | 4.6  | 3    |      |
|        | LSDAGQYLCQAGDSDNSNK                    |    |     | 1.09 | 5.0  | 2    |      |
|        | LSDAGQYLCQAGDSDNSNKK                   |    |     | 1.09 | 5.1  | 2    |      |
|        | LVSLTLNLVTR                            |    |     | 0.92 | 3.8  | 2    |      |
|        | NADLQVLKPEPELVYEDLR                    |    |     | 0.92 | 6.5  | 3    |      |
|        | QGHFYGETAAVYVAVEER                     |    |     | 0.91 | 4.9  | 2    |      |
|        | QSSGENCDVVNTLGK                        |    |     | 0.99 | 4.6  | 2    |      |
|        | RAPAFEGR                               |    |     | 1.01 | 2.5  | 2    |      |
|        | SPIFGPEEVNSVEGNSVSITCYPPTSVNR          |    |     | 0.96 | 6.5  | 3    |      |
|        | TVTINCPFK                              |    |     | 1.06 | 2.8  | 2    |      |
|        | VYTVDLGR                               |    |     | 1.01 | 2.2  | 2    |      |
|        | WNNTGCQALPSQDEGPSK                     |    |     | 0.99 | 4.8  | 2    |      |
| P01834 | IGKC Ig kappa chain C region           | 7  | 225 | 2718 | 0.94 | 0.03 | 0.00 |
|        | DSTYLSSTLTLSK                          |    |     | 0.89 | 4.3  | 2    |      |
|        | HKVYACEVTHQGLSSPVTK                    |    |     | 0.95 | 4.2  | 4    |      |
|        | SGTASVCLLNNFYPR                        |    |     | 0.90 | 4.9  | 3    |      |
|        | TVAAPSVFIFPPSDEQLK                     |    |     | 0.95 | 4.9  | 3    |      |
|        | VDNALQSGNSQESVTEQDSK                   |    |     | 0.95 | 5.9  | 2    |      |
|        | VDNALQSGNSQESVTEQDSKDSTYLSSTLTLSK      |    |     | 0.96 | 5.9  | 3    |      |
|        | VYACEVTHQGLSSPVTK                      |    |     | 1.06 | 5.7  | 2    |      |
| P01857 | IGHG1 Ig gamma_1 chain C region        | 4  | 44  | 488  | 0.97 | 0.09 | 1.00 |
|        | FNWYVDGVEVHNAK                         |    |     | 0.91 | 5.4  | 2    |      |
|        | GPSVFPLAPSSK                           |    |     | 1.12 | 2.9  | 2    |      |
|        | THTCPPCPAPELGGPSVFLFPPKPK              |    |     | 0.96 | 6.6  | 3    |      |
|        | TPEVTCVVVDVSHEDPEVK                    |    |     | 0.97 | 5.5  | 2    |      |
| P01859 | IGHG2 Ig gamma_2 chain C region        | 3  | 20  | 163  | 0.96 | 0.16 | 1.00 |
|        | CCVECPPCAPPVAGPSVFLFPPKPK              |    |     | 0.94 | 5.7  | 3    |      |
|        | GFYPSDISVEWESNGQPENNYK                 |    |     | 1.00 | 4.1  | 2    |      |
|        | VVSVLTVVHQDWLNGK                       |    |     | 0.96 | 5.1  | 2    |      |
| P01860 | IGHG3 Ig gamma_3 chain C region        | 7  | 42  | 409  | 1.02 | 0.12 | 1.00 |
|        | CPAPELGGPSVFLFPPKPK                    |    |     | 0.92 | 5.2  | 3    |      |

|        |                                      |    |    |      |      |      |      |
|--------|--------------------------------------|----|----|------|------|------|------|
|        | EPQVYTLPPSREEMTK+Oxidation(13)       |    |    | 1.10 | 3.0  | 2    |      |
|        | SCDTPPPCPR                           |    |    | 1.10 | 2.8  | 2    |      |
|        | STSGGTAALGCLVK                       |    |    | 1.07 | 4.5  | 2    |      |
|        | TPEVTCVVVDVSHEDPEVQFK                |    |    | 1.00 | 5.2  | 3    |      |
|        | WQQGNIFSCSVMHEALHNR                  |    |    | 1.10 | 2.9  | 2    |      |
|        | WYVDGVEVHNAK                         |    |    | 1.00 | 3.9  | 2    |      |
| P01861 | IGHG4 Ig gamma_4 chain C region      | 11 | 53 | 575  | 0.98 | 0.11 | 1.00 |
|        | DTLMISR+Oxidation(3)                 |    |    | 0.91 | 2.4  | 2    |      |
|        | EPQVYTLPPSQEEMTK                     |    |    | 0.97 | 2.5  | 2    |      |
|        | EPQVYTLPPSQEEMTK+Oxidation(13)       |    |    | 1.02 | 2.3  | 2    |      |
|        | GFYPSDIAVEWESNGQPENNYK               |    |    | 0.92 | 5.2  | 3    |      |
|        | GPSVFFLAPCSR                         |    |    | 1.23 | 2.2  | 2    |      |
|        | NQVSLTCLVK                           |    |    | 1.04 | 3.2  | 2    |      |
|        | STSESTAALGCLVK                       |    |    | 1.05 | 4.6  | 2    |      |
|        | VVSVLTVLHQDWLNGK                     |    |    | 0.93 | 5.0  | 2    |      |
|        | VVSVLTVLHQDWLNGKEYK                  |    |    | 1.00 | 3.6  | 3    |      |
|        | WQEGNVFSCSVMHEALHNHYTQK              |    |    | 0.98 | 3.1  | 3    |      |
|        | YGPPCPSPCAPEFLGGPSVFLFPPKPK          |    |    | 0.89 | 5.4  | 3    |      |
| P01871 | IGHM Ig mu chain C region            | 3  | 6  | 73   | 1.01 | 0.24 | 1.00 |
|        | NVPLPVIAELPPK                        |    |    | 1.04 | 2.6  | 2    |      |
|        | QVGSVGTDDQVQAEAK                     |    |    | 0.91 | 4.7  | 2    |      |
|        | YAATSQVLLPSK                         |    |    | 1.05 | 3.2  | 2    |      |
| P01876 | IGHA1 Ig alpha_1 chain C region      | 6  | 68 | 836  | 0.95 | 0.07 | 1.00 |
|        | DASGVFTFWTPSSGK                      |    |    | 0.97 | 5.3  | 2    |      |
|        | DLCGCYSVSSVLPGCAEPWNHGK              |    |    | 0.98 | 4.5  | 2    |      |
|        | DLCGCYSVSSVLPGCAEPWNHGKFTFTCTAAYPESK |    |    | 0.98 | 4.4  | 4    |      |
|        | NFPPSQDASGDLYTTSSQLTLPATQCLAGK       |    |    | 0.91 | 6.2  | 3    |      |
|        | TFTCTAAYPESK                         |    |    | 0.92 | 3.9  | 2    |      |
|        | TPLTATLSK                            |    |    | 1.03 | 2.0  | 1    |      |
| P01877 | IGHA2 Ig alpha_2 chain C region      | 12 | 99 | 940  | 0.99 | 0.06 | 1.00 |
|        | DASGATFTWTPSSGK                      |    |    | 1.02 | 4.7  | 2    |      |
|        | DLCGCYSVSSVLPGCAQPWNHGETFTCTAAHPELK  |    |    | 0.98 | 5.1  | 4    |      |
|        | GDTFSCMVGHEALPLAFTQK                 |    |    | 0.97 | 4.3  | 2    |      |
|        | GDTFSCMVGHEALPLAFTQK+Oxidation(6)    |    |    | 0.94 | 4.0  | 3    |      |
|        | HYTNPSQDVTVPCPVPPPPPCCHPR            |    |    | 1.06 | 5.6  | 2    |      |
|        | KGDTFSCMVGHEALPLAFTQK                |    |    | 0.91 | 5.4  | 3    |      |
|        | KGDTFSCMVGHEALPLAFTQK+Oxidation(7)   |    |    | 0.97 | 4.6  | 3    |      |
|        | NFPPSQDASGDLYTTSSQLTLPATQCPDGK       |    |    | 0.98 | 5.2  | 3    |      |
|        | QEPSQGTTFFAVTSILR                    |    |    | 0.93 | 4.5  | 3    |      |
|        | SAVQGPPER                            |    |    | 1.04 | 2.8  | 2    |      |
|        | WLQGSQELPR                           |    |    | 1.05 | 3.7  | 2    |      |
|        | YLTWASR                              |    |    | 1.03 | 2.7  | 2    |      |
| P02042 | HBD Hemoglobin subunit delta         | 6  | 24 | 284  | 1.03 | 0.14 | 1.00 |
|        | GTFSQSELHCDK                         |    |    | 1.14 | 3.2  | 2    |      |
|        | KVLGAFSDGLAHLDNLK                    |    |    | 0.99 | 5.8  | 3    |      |
|        | LHVDPENFR                            |    |    | 1.04 | 2.3  | 2    |      |
|        | VLGAFSDGLAHLDNLK                     |    |    | 0.99 | 5.0  | 2    |      |
|        | VNVDVAVGGEALGR                       |    |    | 1.08 | 3.9  | 2    |      |
|        | VVAGVANALAHK                         |    |    | 1.02 | 3.8  | 2    |      |
| P02647 | APOA1 Apolipoprotein A_I             | 15 | 58 | 553  | 0.96 | 0.09 | 1.00 |
|        | AELQEGAR                             |    |    | 1.04 | 2.1  | 2    |      |
|        | AKPALEDLR                            |    |    | 0.96 | 3.2  | 3    |      |
|        | ATEHLSTLSEK                          |    |    | 1.03 | 3.6  | 3    |      |
|        | DLATVYVDVLK                          |    |    | 0.95 | 3.9  | 2    |      |
|        | DYVSQFEFSALGK                        |    |    | 0.95 | 4.7  | 2    |      |
|        | EQLGPVTQEFWDNLEK                     |    |    | 0.40 | 4.0  | 2    |      |
|        | LLDNWDSVTSTFSK                       |    |    | 0.94 | 4.5  | 2    |      |
|        | LREQLGPVTQEFWDNLEK                   |    |    | 0.52 | 4.6  | 3    |      |
|        | LSPLGEEMR+Oxidation(7)               |    |    | 0.86 | 2.4  | 2    |      |
|        | QGLLPVLESFK                          |    |    | 0.92 | 2.9  | 2    |      |
|        | THLAPYSDELK                          |    |    | 1.16 | 3.4  | 2    |      |
|        | VKDLATVYVDVLK                        |    |    | 0.90 | 3.9  | 2    |      |
|        | VQPYLDDFQK                           |    |    | 0.97 | 2.6  | 2    |      |
|        | VSFLSALEEYTK                         |    |    | 0.83 | 4.6  | 2    |      |
|        | WQEEMELYR+Oxidation(4)               |    |    | 0.96 | 2.2  | 2    |      |
| P02649 | APOE Apolipoprotein E                | 2  | 3  | 20   | 0.98 | 0.30 | 1.00 |
|        | AKLEEQAQQIR                          |    |    | 0.98 | 3.3  | 3    |      |



|        |                                            |    |    |      |      |      |      |
|--------|--------------------------------------------|----|----|------|------|------|------|
|        | SELEEQLTPVAEETR                            |    |    | 0.98 | 4.6  | 2    |      |
| P02652 | APOA2 Apolipoprotein A_II                  | 3  | 5  | 27   | 0.93 | 0.34 | 0.94 |
|        | EPCVESLVSQYFQTVTDYGK                       |    |    | 0.77 | 4.5  | 2    |      |
|        | SKEQLTPLIK                                 |    |    | 0.85 | 2.6  | 2    |      |
|        | VKSPELQAEAK                                |    |    | 1.01 | 3.9  | 3    |      |
| P02654 | APOC1 Apolipoprotein C_I                   | 2  | 3  | 7    | 1.11 | 0.77 | 0.87 |
|        | EFWFSETFQK                                 |    |    | 1.20 | 2.4  | 1    |      |
|        | LKEFGNTLEDK                                |    |    | 0.98 | 2.5  | 2    |      |
| P02656 | APOC3 Apolipoprotein C_III                 | 2  | 2  | 25   | 1.02 | 0.36 | 0.95 |
|        | DALSSVQESQVAQQAR                           |    |    | 1.10 | 4.2  | 2    |      |
|        | GWVTDGFFSLK                                |    |    | 0.95 | 3.0  | 2    |      |
| P02671 | FIBA Fibrinogen alpha chain                | 11 | 21 | 119  | 0.97 | 0.19 | 0.05 |
|        | DSHSLTTNIMEILR                             |    |    | 0.94 | 3.1  | 2    |      |
|        | ESSSHHPGIAEFPSR                            |    |    | 1.07 | 3.3  | 3    |      |
|        | EVDLKDYEDQQK                               |    |    | 0.98 | 3.4  | 2    |      |
|        | EVVTSEGDSDCPEAMDGLTSLGIGTLDGFR             |    |    | 0.83 | 5.0  | 3    |      |
|        | GGSTSYGTGSETESPR                           |    |    | 1.10 | 3.9  | 2    |      |
|        | GLIDEVNDQDFTNR                             |    |    | 0.86 | 3.3  | 2    |      |
|        | HRHPDEAAFFDTASTGK                          |    |    | 1.00 | 4.6  | 3    |      |
|        | NPSSAGSWNSGSSGPGSTGNR                      |    |    | 0.67 | 5.0  | 2    |      |
|        | QFTSSTSYNR                                 |    |    | 0.98 | 2.3  | 2    |      |
|        | RLEVDIDIK                                  |    |    | 1.09 | 2.4  | 2    |      |
|        | VQHIQLLQK                                  |    |    | 1.04 | 2.1  | 2    |      |
| P02675 | FIBB Fibrinogen beta chain                 | 14 | 24 | 172  | 0.98 | 0.13 | 1.00 |
|        | AHYGGFTVQNEANK                             |    |    | 1.00 | 4.4  | 2    |      |
|        | DNDGWLTSDPR                                |    |    | 1.60 | 2.1  | 2    |      |
|        | DNENVVNEYSSSELEK                           |    |    | 1.00 | 4.7  | 2    |      |
|        | EEAPSLRPAPPPISGGGYR                        |    |    | 1.02 | 2.2  | 2    |      |
|        | GGETSEMYLIQPDSSVKPYR+Oxidation(6)          |    |    | 0.87 | 3.2  | 3    |      |
|        | HGTDDGVVWMNWK+Oxidation(9)                 |    |    | 0.88 | 2.5  | 2    |      |
|        | HQLYIDETVNSNIPTNLR                         |    |    | 0.95 | 4.8  | 2    |      |
|        | LESDVSAQMEYCR                              |    |    | 1.11 | 3.1  | 2    |      |
|        | LESDVSAQMEYCR+Oxidation(8)                 |    |    | 0.87 | 4.3  | 2    |      |
|        | NYCGLPGEYWLGNDAK                           |    |    | 0.98 | 3.3  | 2    |      |
|        | QGFGNVATNTDGK                              |    |    | 0.87 | 3.0  | 2    |      |
|        | REEAPSLRPAPPPISGGGYR                       |    |    | 1.00 | 3.1  | 3    |      |
|        | TPCTVSCNIPVVSGK                            |    |    | 1.18 | 3.4  | 2    |      |
|        | VYCDMNTENGGWTVIQNR                         |    |    | 0.92 | 3.9  | 2    |      |
| P02679 | FIBG Fibrinogen gamma chain                | 13 | 27 | 143  | 0.99 | 0.14 | 1.00 |
|        | AIQLTYNPDESSKPNMIDAATLK                    |    |    | 1.02 | 3.0  | 3    |      |
|        | ASTPNGYDNGIHWATWK                          |    |    | 0.97 | 3.7  | 2    |      |
|        | CHAGHLNGVYQGGTYSK                          |    |    | 0.86 | 4.0  | 3    |      |
|        | DNCCILDER                                  |    |    | 0.73 | 2.5  | 2    |      |
|        | EGFGHLSPTGTTEFWLGNEK                       |    |    | 0.78 | 3.3  | 3    |      |
|        | IHLISTQSAIPYALR                            |    |    | 1.02 | 4.0  | 2    |      |
|        | LDGSVDFK                                   |    |    | 0.96 | 2.3  | 2    |      |
|        | QSGLYFIKPLK                                |    |    | 0.94 | 2.5  | 2    |      |
|        | RLDGSVDFK                                  |    |    | 0.92 | 2.2  | 2    |      |
|        | VAQLEAQCQEPCKDTVQIHIDITGK                  |    |    | 1.11 | 4.0  | 3    |      |
|        | VELEDWNGR                                  |    |    | 0.98 | 2.6  | 2    |      |
|        | YEASILTHDSSIR                              |    |    | 1.09 | 3.9  | 2    |      |
|        | YLQEIYNSNNQK                               |    |    | 0.99 | 4.9  | 2    |      |
| P02743 | SAMP Serum amyloid P_component             | 2  | 4  | 8    | 0.91 | 0.30 | 0.57 |
|        | GYVIKPLVWV                                 |    |    | 0.86 | 2.5  | 2    |      |
|        | IVLGQEQDSYGGK                              |    |    | 0.98 | 3.5  | 2    |      |
| P02746 | C1QB Complement C1q subcomponent subunit B | 2  | 5  | 41   | 1.05 | 0.41 | 1.00 |
|        | GPMGPKGGPGAPGAPGPK                         |    |    | 1.14 | 2.8  | 2    |      |
|        | LEQGENVFLQATDK                             |    |    | 0.92 | 4.0  | 2    |      |
| P02747 | C1QC Complement C1q subcomponent subunit C | 2  | 3  | 24   | 0.99 | 0.34 | 0.99 |
|        | FNAVLTNPQGDYDTSTGK                         |    |    | 1.01 | 5.0  | 2    |      |
|        | FQSVFTVTR                                  |    |    | 0.95 | 2.3  | 2    |      |
| P02748 | CO9 Complement component C9                | 5  | 6  | 50   | 0.97 | 0.21 | 1.00 |
|        | AEQCCEETASSISLHGK                          |    |    | 0.97 | 3.2  | 3    |      |
|        | LSPIYNLVPVK                                |    |    | 0.87 | 3.0  | 2    |      |
|        | SIEVFGQFNGK                                |    |    | 1.00 | 3.3  | 2    |      |
|        | TEHYEEQIEAFK                               |    |    | 0.98 | 3.2  | 2    |      |
|        | VVEESELAR                                  |    |    | 0.94 | 2.4  | 2    |      |

|        |       |                                          |    |    |      |      |      |      |
|--------|-------|------------------------------------------|----|----|------|------|------|------|
| P02749 | APOH  | Beta_2_glycoprotein 1                    | 11 | 31 | 252  | 0.96 | 0.10 | 1.00 |
|        |       | ATFGCHDGYSLDGPPEIECTK                    |    |    | 0.94 | 5.5  | 3    |      |
|        |       | ATVVYQGER                                |    |    | 0.96 | 2.9  | 2    |      |
|        |       | CSYTEDAQCIDGTIEVPK                       |    |    | 0.86 | 3.8  | 2    |      |
|        |       | DKATFGCHDGYSLDGPPEIECTK                  |    |    | 1.13 | 3.2  | 3    |      |
|        |       | FICPLTGLWPINTLK                          |    |    | 0.87 | 4.4  | 2    |      |
|        |       | KCSYTEDAQCIDGTIEVPK                      |    |    | 0.99 | 4.7  | 2    |      |
|        |       | TCPKPDDLPFSTVVPLK                        |    |    | 0.98 | 4.3  | 3    |      |
|        |       | TDASDVKPC                                |    |    | 0.94 | 2.1  | 2    |      |
|        |       | TFYEPGEEITYSCKPGYVSR                     |    |    | 0.95 | 4.9  | 2    |      |
|        |       | VCPFAGILENGAVR                           |    |    | 0.95 | 3.7  | 2    |      |
|        |       | WSPPELVCAPIICPPPSIPTFATLR                |    |    | 0.95 | 3.3  | 2    |      |
| P02750 | A2GL  | Leucine_rich alpha_2_glycoprotein        | 5  | 12 | 78   | 1.01 | 0.18 | 1.00 |
|        |       | ALGHLDLSGNR                              |    |    | 1.11 | 2.5  | 2    |      |
|        |       | DGFDISGNPWICDQNLSDLYR                    |    |    | 0.99 | 5.0  | 3    |      |
|        |       | DLLLQPDLR                                |    |    | 1.07 | 2.7  | 2    |      |
|        |       | LQELHLSSNGLESLSPEFLRPVPLR                |    |    | 0.99 | 3.8  | 3    |      |
|        |       | TLDLGENQLETLPDCLR                        |    |    | 0.93 | 4.7  | 2    |      |
| P02751 | FINC  | Fibronectin                              | 33 | 72 | 396  | 0.99 | 0.08 | 1.00 |
|        |       | DDKESVPISDTIIPAVPPPTDLR                  |    |    | 0.95 | 3.0  | 3    |      |
|        |       | DLQFVEVTDVK                              |    |    | 0.95 | 4.0  | 2    |      |
|        |       | EESPLLIGQQSTVSDVPR                       |    |    | 1.01 | 3.8  | 2    |      |
|        |       | EINLAPDSSSVVVSGLMVATK                    |    |    | 0.94 | 3.6  | 2    |      |
|        |       | EYLGAICTCFGGQR                           |    |    | 0.94 | 4.3  | 2    |      |
|        |       | FTQVTPSLSAQWTPPNVQLTGYR                  |    |    | 0.93 | 5.2  | 2    |      |
|        |       | GDSPASSKPISINR                           |    |    | 1.12 | 3.1  | 2    |      |
|        |       | GEWTCIAYSQLR                             |    |    | 0.93 | 2.9  | 2    |      |
|        |       | GFNCESKPEAEETCFDK                        |    |    | 1.08 | 3.7  | 2    |      |
|        |       | GLAFTDVDVDSIK                            |    |    | 1.03 | 3.0  | 2    |      |
|        |       | GNULLQICITGNR                            |    |    | 1.09 | 3.3  | 2    |      |
|        |       | HTSVQTTSSSGSPFTDVR                       |    |    | 1.05 | 5.1  | 2    |      |
|        |       | HYQINQQWER                               |    |    | 0.97 | 3.1  | 2    |      |
|        |       | ITYGETGGNSPVQEFTVPGSK                    |    |    | 0.93 | 3.9  | 2    |      |
|        |       | LGVRPSQGGAPR                             |    |    | 0.97 | 3.9  | 3    |      |
|        |       | NLQPASEYTVSLVAIK                         |    |    | 0.65 | 3.0  | 2    |      |
|        |       | NTFAEVTGLSPGVTYFK                        |    |    | 0.86 | 4.9  | 2    |      |
|        |       | QDGHLCSTTSNYEQDQK                        |    |    | 1.06 | 2.7  | 2    |      |
|        |       | SSPVVIDASTAIDAPSNLR                      |    |    | 0.95 | 4.4  | 3    |      |
|        |       | STATISGLKPGVDYITVYAVTGR                  |    |    | 0.86 | 3.1  | 3    |      |
|        |       | SYTITGLQPGTDYK                           |    |    | 1.01 | 4.2  | 2    |      |
|        |       | TEIDKPSQMQVTDVQDNSISVK                   |    |    | 1.09 | 3.5  | 2    |      |
|        |       | TEIDKPSQMQVTDVQDNSISVK+Oxidation(8)      |    |    | 0.90 | 4.1  | 3    |      |
|        |       | TETITGFQVDAVPANGQTPIQR                   |    |    | 0.98 | 4.5  | 2    |      |
|        |       | TYHVGEQWQK                               |    |    | 0.99 | 3.9  | 3    |      |
|        |       | TYLGNALVCTCYGGSR                         |    |    | 0.97 | 5.0  | 2    |      |
|        |       | VDVIPVNLPGEHGQR                          |    |    | 1.35 | 2.3  | 2    |      |
|        |       | VEYELSEEDEPQYLDLPSTATSVNIPDLLPGRK        |    |    | 1.02 | 6.4  | 3    |      |
|        |       | VPGTSTSATLTGLTR                          |    |    | 1.15 | 2.5  | 2    |      |
|        |       | VVTPLSPTNLHLEANPDTGVLTVSWER              |    |    | 0.97 | 4.8  | 3    |      |
|        |       | WCGTTQNYDADQK                            |    |    | 0.80 | 4.2  | 2    |      |
|        |       | YEVSVYALK                                |    |    | 0.90 | 2.3  | 2    |      |
|        |       | YSFCTDHTVLVQTR                           |    |    | 1.00 | 3.5  | 2    |      |
| P02760 | AMBP  | Protein AMBP                             | 8  | 13 | 100  | 0.97 | 0.22 | 1.00 |
|        |       | CVLFPYGGCQGNK                            |    |    | 0.98 | 3.2  | 2    |      |
|        |       | EYCGVPGDGDEELLR                          |    |    | 0.97 | 3.0  | 2    |      |
|        |       | GECVPGEQEPEPILIPR                        |    |    | 0.93 | 4.3  | 2    |      |
|        |       | GVCEETSGAYEK                             |    |    | 1.01 | 3.8  | 2    |      |
|        |       | KGVCEETSGAYEK                            |    |    | 0.99 | 3.7  | 2    |      |
|        |       | TVAACNLPIVR                              |    |    | 1.04 | 3.5  | 2    |      |
|        |       | VVAQGVGIPEDSIFTMADR                      |    |    | 0.93 | 2.9  | 2    |      |
|        |       | WYNLAIGSTCPWLK                           |    |    | 0.96 | 2.6  | 2    |      |
| P02763 | A1AG1 | Alpha_1_acid glycoprotein 1              | 5  | 14 | 163  | 0.95 | 0.21 | 1.00 |
|        |       | NWGLSVYADKPETTK                          |    |    | 0.95 | 4.4  | 2    |      |
|        |       | SDVVYTDWK                                |    |    | 0.99 | 3.2  | 2    |      |
|        |       | SDVVYTDWKK                               |    |    | 0.88 | 2.7  | 2    |      |
|        |       | TYMLAFDVNDEKNWGLSVYADKPETTK+Oxidation(2) |    |    | 0.63 | 3.1  | 3    |      |
|        |       | YVGQEHFAHLLILR                           |    |    | 0.98 | 4.8  | 2    |      |

|        |       |                                      |    |      |       |      |      |      |
|--------|-------|--------------------------------------|----|------|-------|------|------|------|
| P02765 | FETUA | Alpha_2_HS_glycoprotein              | 9  | 36   | 327   | 0.97 | 0.12 | 1.00 |
|        |       | AQLVPLPPSTYVEFTVSGTDCVAK             |    |      | 0.60  | 3.6  | 3    |      |
|        |       | CDSSPDSAEDVR                         |    |      | 1.12  | 3.8  | 2    |      |
|        |       | CDSSPDSAEDVRK                        |    |      | 0.90  | 3.4  | 3    |      |
|        |       | EHAVEGDCDFQLLK                       |    |      | 0.99  | 4.2  | 2    |      |
|        |       | FSVVYAK                              |    |      | 0.95  | 2.1  | 2    |      |
|        |       | HTFMGVVSLGSPSGEVSHPR                 |    |      | 0.94  | 3.7  | 3    |      |
|        |       | HTFMGVVSLGSPSGEVSHPR+Oxidation(3)    |    |      | 0.90  | 4.8  | 3    |      |
|        |       | HTLNQIDEVK                           |    |      | 0.94  | 3.8  | 2    |      |
|        |       | TVVQPSVGAAGPVVPPCPGR                 |    |      | 1.03  | 4.4  | 2    |      |
| P02766 | TTHY  | Transthyretin                        | 8  | 30   | 260   | 0.96 | 0.10 | 1.00 |
|        |       | AADDTWEPFASGK                        |    |      | 1.02  | 4.4  | 2    |      |
|        |       | ALGISPFHEHAEVFTANDSGPR               |    |      | 0.96  | 5.2  | 2    |      |
|        |       | GSPAINVAVHVFR                        |    |      | 1.07  | 4.1  | 2    |      |
|        |       | RYTIAALLSPYSYSTTAVVTNPK              |    |      | 1.00  | 4.2  | 2    |      |
|        |       | RYTIAALLSPYSYSTTAVVTNPK              |    |      | 0.90  | 5.2  | 2    |      |
|        |       | TSESGELHGLTTEEEFVEGIYK               |    |      | 0.41  | 4.7  | 2    |      |
|        |       | YTIAALLSPYSYSTTAVVTNPK               |    |      | 0.94  | 5.1  | 2    |      |
|        |       | YTIAALLSPYSYSTTAVVTNPK               |    |      | 0.92  | 5.4  | 2    |      |
| P02768 | ALBU  | Serum albumin                        | 66 | 1381 | 18232 | 0.94 | 0.02 | 0.99 |
|        |       | AACLLPK                              |    |      | 0.95  | 2.7  | 2    |      |
|        |       | AAFTECCQAADK                         |    |      | 0.89  | 4.1  | 2    |      |
|        |       | ADDKETCFAEEGK                        |    |      | 0.87  | 4.0  | 3    |      |
|        |       | ADDKETCFAEEGKK                       |    |      | 0.96  | 5.3  | 3    |      |
|        |       | AEFAEVSK                             |    |      | 0.93  | 2.7  | 2    |      |
|        |       | AEFAEVSKLVDTLTK                      |    |      | 0.98  | 2.8  | 2    |      |
|        |       | ALVLIAFAQYLQQCPFEDHVK                |    |      | 0.91  | 5.9  | 4    |      |
|        |       | AVMDDFAAFVEK                         |    |      | 0.48  | 4.1  | 2    |      |
|        |       | AVMDDFAAFVEK+Oxidation(2)            |    |      | 0.49  | 4.3  | 2    |      |
|        |       | CCAAADPHECYAK                        |    |      | 0.90  | 4.2  | 2    |      |
|        |       | CCTESLVNR                            |    |      | 0.87  | 3.3  | 2    |      |
|        |       | DDNPNLPR                             |    |      | 0.93  | 2.7  | 2    |      |
|        |       | DLGEENFK                             |    |      | 0.99  | 3.1  | 2    |      |
|        |       | DVFLGMFLYEYAR                        |    |      | 0.88  | 4.0  | 2    |      |
|        |       | DVFLGMFLYEYAR+Oxidation(5)           |    |      | 0.93  | 4.4  | 2    |      |
|        |       | ECCEKPLEK                            |    |      | 1.05  | 2.8  | 2    |      |
|        |       | EFNAETTFHADICTLSEK                   |    |      | 0.87  | 6.0  | 2    |      |
|        |       | ETCFAEEGKK                           |    |      | 0.90  | 2.4  | 2    |      |
|        |       | ETYGEMADCCAK                         |    |      | 0.83  | 3.4  | 2    |      |
|        |       | ETYGEMADCCAK+Oxidation(5)            |    |      | 0.97  | 3.5  | 2    |      |
|        |       | FKDLGEENFK                           |    |      | 1.07  | 4.1  | 3    |      |
|        |       | FQNALLVR                             |    |      | 0.97  | 3.1  | 2    |      |
|        |       | HPDYSVLLLR                           |    |      | 0.24  | 2.6  | 2    |      |
|        |       | KLVAASQAALGL                         |    |      | 0.95  | 3.5  | 2    |      |
|        |       | KQTALVELVK                           |    |      | 1.02  | 5.1  | 3    |      |
|        |       | KVPQVSTPTLVEVSR                      |    |      | 0.99  | 5.8  | 3    |      |
|        |       | KYLYEIAR                             |    |      | 1.09  | 3.3  | 2    |      |
|        |       | LCTVATLR                             |    |      | 0.94  | 2.4  | 2    |      |
|        |       | LDELRDEGK                            |    |      | 0.93  | 2.7  | 2    |      |
|        |       | LDELRDEGKASSAK                       |    |      | 1.15  | 3.5  | 3    |      |
|        |       | LKECCEKPLEK                          |    |      | 0.92  | 4.4  | 2    |      |
|        |       | LSQRFPKAEFAEVSK                      |    |      | 1.12  | 4.3  | 3    |      |
|        |       | LVAASQAALGL                          |    |      | 0.87  | 4.4  | 2    |      |
|        |       | LVNEVTEFAK                           |    |      | 1.02  | 3.8  | 2    |      |
|        |       | LVRPEVDVMCTAFHDNEETFLK               |    |      | 0.96  | 6.4  | 3    |      |
|        |       | LVRPEVDVMCTAFHDNEETFLK+Oxidation(8)  |    |      | 0.89  | 5.9  | 3    |      |
|        |       | LVRPEVDVMCTAFHDNEETFLKK              |    |      | 0.91  | 6.6  | 3    |      |
|        |       | LVRPEVDVMCTAFHDNEETFLKK+Oxidation(8) |    |      | 0.91  | 5.1  | 3    |      |
|        |       | LVTDLTK                              |    |      | 1.00  | 2.4  | 2    |      |
|        |       | MPCAEDYLSVVLNQLCVLHEK                |    |      | 0.32  | 5.0  | 3    |      |
|        |       | MPCAEDYLSVVLNQLCVLHEK+Oxidation(0)   |    |      | 0.30  | 4.9  | 3    |      |
|        |       | MPCAEDYLSVVLNQLCVLHEKTPVSDR          |    |      | 0.91  | 4.4  | 4    |      |
|        |       | NECFLQHKDDNPNLPR                     |    |      | 1.10  | 5.3  | 2    |      |
|        |       | NYAEAK                               |    |      | 0.81  | 2.1  | 1    |      |
|        |       | QEPERNECFLQHK                        |    |      | 0.94  | 2.6  | 2    |      |
|        |       | QEPERNECFLQHKDDNPNLPR                |    |      | 1.07  | 3.2  | 3    |      |
|        |       | QNCELFEQLGEYK                        |    |      | 0.88  | 4.4  | 2    |      |

|        |                                                 |    |     |      |      |      |      |
|--------|-------------------------------------------------|----|-----|------|------|------|------|
|        | QNCLEFEQLGEYKFNALLVR                            |    |     | 1.13 | 3.9  | 3    |      |
|        | QTALVELVK                                       |    |     | 1.04 | 2.4  | 2    |      |
|        | RHPDYSVLLLLR                                    |    |     | 0.47 | 5.1  | 3    |      |
|        | RMPCAEDYLSVVLNQLCVLHEK                          |    |     | 0.96 | 3.6  | 3    |      |
|        | RMPCAEDYLSVVLNQLCVLHEK+Oxidation(1)             |    |     | 0.47 | 4.7  | 3    |      |
|        | RPCFSALEVDETYVPK                                |    |     | 0.83 | 4.2  | 3    |      |
|        | SHCIAEVENDEMPADLPSLAADFVESK                     |    |     | 0.18 | 5.6  | 3    |      |
|        | SHCIAEVENDEMPADLPSLAADFVESK+Oxidation(11)       |    |     | 0.51 | 6.3  | 3    |      |
|        | SLHTLFGDK                                       |    |     | 1.13 | 2.8  | 1    |      |
|        | SLHTLFGDKLCTVATLR                               |    |     | 1.07 | 3.1  | 2    |      |
|        | TCVADESAENCDK                                   |    |     | 0.96 | 4.9  | 2    |      |
|        | TYETTLEK                                        |    |     | 0.93 | 2.7  | 2    |      |
|        | VFDEFKPLVEEPQNLIK                               |    |     | 0.94 | 5.5  | 3    |      |
|        | VHTECCHGDLLECADDR                               |    |     | 1.04 | 6.6  | 2    |      |
|        | VHTECCHGDLLECADDRADLAK                          |    |     | 1.02 | 5.9  | 3    |      |
|        | VPQVSTPTLVEVSR                                  |    |     | 0.95 | 4.0  | 3    |      |
|        | YICENQDSISSK                                    |    |     | 0.89 | 4.5  | 2    |      |
|        | YKAAFTECCQAADK                                  |    |     | 1.10 | 3.5  | 3    |      |
|        | YLIEIAR                                         |    |     | 1.02 | 3.3  | 2    |      |
| P02774 | VTDB Vitamin D_binding protein                  | 20 | 87  | 607  | 0.96 | 0.08 | 1.00 |
|        | CCESASEDCMAK+Oxidation(9)                       |    |     | 0.87 | 3.9  | 2    |      |
|        | ELSSFIDKQGELCADYSENTFTEYK                       |    |     | 0.92 | 5.9  | 3    |      |
|        | EVVSLTEACCAEGADPDCYDTR                          |    |     | 0.94 | 5.5  | 2    |      |
|        | FPSGTFEQVSQLVK                                  |    |     | 0.98 | 4.8  | 2    |      |
|        | GQELCADYSENTFTEYK                               |    |     | 0.88 | 5.8  | 2    |      |
|        | GQELCADYSENTFTEYKK                              |    |     | 1.03 | 3.9  | 2    |      |
|        | HLSLLTTLNLR                                     |    |     | 0.96 | 3.5  | 2    |      |
|        | HQPQEFPTYVEPTNDEICEAFR                          |    |     | 0.98 | 6.4  | 3    |      |
|        | KFPSGTFEQVSQLVK                                 |    |     | 0.95 | 4.8  | 2    |      |
|        | KLCMAALK+Oxidation(3)                           |    |     | 0.97 | 2.2  | 2    |      |
|        | RSDFASNCCSINSPPLYCDSEIDAELK                     |    |     | 0.88 | 5.1  | 3    |      |
|        | RTHLPEVFLSK                                     |    |     | 1.01 | 4.0  | 3    |      |
|        | SCESNSPPVHPGTAECCTK                             |    |     | 1.19 | 5.1  | 2    |      |
|        | SDFASNCCSINSPPLYCDSEIDAELK                      |    |     | 1.01 | 5.2  | 3    |      |
|        | SLGECCDVEDSTTCFNAK                              |    |     | 0.96 | 5.5  | 2    |      |
|        | SYLSMVGSCCTSASPTVCFLK                           |    |     | 0.90 | 5.3  | 2    |      |
|        | SYLSMVGSCCTSASPTVCFLK+Oxidation(4)              |    |     | 0.95 | 5.2  | 2    |      |
|        | THLPEVFLSK                                      |    |     | 0.98 | 3.5  | 3    |      |
|        | VCSQYAAAYGEK                                    |    |     | 0.80 | 3.2  | 2    |      |
|        | YTFELSR                                         |    |     | 0.96 | 2.3  | 1    |      |
| P02787 | TRFE Serotransferrin                            | 54 | 362 | 3676 | 0.96 | 0.05 | 1.00 |
|        | ADRDQYELLCLDNTR                                 |    |     | 0.32 | 4.3  | 2    |      |
|        | AIAANEADAVTLDAGLVYDAYLAPNNLKPVVAEFGYGSK         |    |     | 0.68 | 6.4  | 4    |      |
|        | ASYLDCIR                                        |    |     | 1.06 | 2.9  | 2    |      |
|        | AVANFFSGSCAPCADGTDGDFPQLCQLCPGCGCSTLNQYFGYSGAFK |    |     | 0.94 | 5.6  | 4    |      |
|        | CDEWSVNSVGK                                     |    |     | 0.99 | 3.9  | 2    |      |
|        | CSTSSLLEACTFR                                   |    |     | 0.96 | 5.1  | 2    |      |
|        | DCHLAQVPSHTVVAR                                 |    |     | 1.16 | 4.7  | 2    |      |
|        | DDTVCLAK                                        |    |     | 0.98 | 2.6  | 2    |      |
|        | DGAGDVAFVK                                      |    |     | 0.95 | 3.8  | 2    |      |
|        | DLLFRDDTVCLAK                                   |    |     | 0.89 | 3.0  | 2    |      |
|        | DQYELLCLDNTR                                    |    |     | 0.59 | 3.2  | 2    |      |
|        | DSAHGFLK                                        |    |     | 0.93 | 2.3  | 2    |      |
|        | DSGFQMNQLR                                      |    |     | 0.97 | 3.7  | 2    |      |
|        | DSGFQMNQLR+Oxidation(5)                         |    |     | 0.93 | 3.4  | 2    |      |
|        | DYELLCLDGTR                                     |    |     | 0.77 | 3.5  | 2    |      |
|        | EDLIWELLNQAQEHFGK                               |    |     | 0.74 | 5.2  | 2    |      |
|        | EDPQTFYYAVAVVK                                  |    |     | 0.60 | 4.6  | 2    |      |
|        | EFQLFSSPHGK                                     |    |     | 1.09 | 3.7  | 2    |      |
|        | EGTCPEAPTDECKPVK                                |    |     | 0.77 | 3.6  | 2    |      |
|        | EGYYGYTGAFR                                     |    |     | 0.94 | 3.5  | 2    |      |
|        | FDEFFSEGCAPGSK                                  |    |     | 0.13 | 4.7  | 2    |      |
|        | GDVAFVK                                         |    |     | 0.96 | 2.3  | 2    |      |
|        | HQTVPQNTGGK                                     |    |     | 0.75 | 2.7  | 2    |      |
|        | HSTIFENLANK                                     |    |     | 1.02 | 4.7  | 3    |      |
|        | IECVSAETTEDCIAK                                 |    |     | 1.02 | 5.2  | 2    |      |
|        | IMNGEADAMSLDGGFVYIAGK                           |    |     | 0.67 | 5.0  | 2    |      |

|        |                                                 |    |     |      |      |      |      |
|--------|-------------------------------------------------|----|-----|------|------|------|------|
|        | IMNGEADAMSLDGGFVYIAGK+Oxidation(1)              |    |     | 0.89 | 5.6  | 2    |      |
|        | IMNGEADAMSLDGGFVYIAGK+Oxidation(1),Oxidation(8) |    |     | 1.00 | 5.6  | 2    |      |
|        | IMNGEADAMSLDGGFVYIAGK+Oxidation(8)              |    |     | 0.89 | 4.2  | 2    |      |
|        | KASYLDCIR                                       |    |     | 1.12 | 2.2  | 2    |      |
|        | KCSTSSLLEACTFR                                  |    |     | 1.00 | 3.7  | 2    |      |
|        | KDSGFQMNQLR                                     |    |     | 0.94 | 3.0  | 3    |      |
|        | KDSGFQMNQLR+Oxidation(6)                        |    |     | 1.09 | 3.6  | 3    |      |
|        | KPVDEYKDCHLAQVPSHTVVAR                          |    |     | 1.08 | 5.3  | 3    |      |
|        | KPVEEYANCHLAR                                   |    |     | 1.36 | 3.9  | 3    |      |
|        | KSASDLTWDNLK                                    |    |     | 0.94 | 3.3  | 2    |      |
|        | LCMGSGLNLCPEPNNK                                |    |     | 0.98 | 5.0  | 2    |      |
|        | LCMGSGLNLCPEPNNK+Oxidation(2)                   |    |     | 0.87 | 4.7  | 2    |      |
|        | LKCDEWSVNSVGK                                   |    |     | 1.12 | 4.3  | 2    |      |
|        | MYLGYEYVTAIR                                    |    |     | 0.35 | 4.2  | 2    |      |
|        | MYLGYEYVTAIR+Oxidation(0)                       |    |     | 0.77 | 4.3  | 2    |      |
|        | NLNEKDYELLCLDGTR                                |    |     | 0.45 | 4.5  | 2    |      |
|        | QQQHFLFGSNVTDCSGNFCLFR                          |    |     | 1.25 | 3.9  | 3    |      |
|        | SASDLTWDNLK                                     |    |     | 0.98 | 3.9  | 2    |      |
|        | SDNCEDTPEAGYFAIAVVK                             |    |     | 1.06 | 2.7  | 2    |      |
|        | SKEFQLFSSPHGK                                   |    |     | 1.01 | 4.3  | 3    |      |
|        | SMGGKEDLIWELLNQAQEHFGK                          |    |     | 0.71 | 5.3  | 3    |      |
|        | SMGGKEDLIWELLNQAQEHFGK+Oxidation(1)             |    |     | 0.89 | 5.4  | 3    |      |
|        | SVIPSDGPSVACVK                                  |    |     | 1.07 | 3.3  | 2    |      |
|        | TAGWNIPMGLLYNK                                  |    |     | 0.74 | 3.9  | 2    |      |
|        | TAGWNIPMGLLYNK+Oxidation(7)                     |    |     | 0.90 | 4.3  | 2    |      |
|        | WCALSHHER                                       |    |     | 0.97 | 3.4  | 2    |      |
|        | WCAVSEHEATK                                     |    |     | 1.04 | 4.0  | 2    |      |
|        | YLGEEYVK                                        |    |     | 1.02 | 3.0  | 2    |      |
| P02788 | TRFL Lactotransferrin                           | 25 | 54  | 370  | 0.96 | 0.10 | 1.00 |
|        | ADAVTLDGGFIYEAGLAPYK                            |    |     | 1.02 | 4.4  | 2    |      |
|        | CGLVPVLAENYK                                    |    |     | 0.95 | 2.8  | 2    |      |
|        | CLAENAGDVAQVK                                   |    |     | 1.00 | 3.7  | 2    |      |
|        | DSPIQCIQAIENR                                   |    |     | 0.93 | 3.6  | 3    |      |
|        | DVTVLQNTDGNNEAWAK                               |    |     | 1.02 | 5.2  | 2    |      |
|        | ESTVFEDLSDEAERDEYELLCPDNTR                      |    |     | 0.94 | 3.8  | 3    |      |
|        | FCLFQSETK                                       |    |     | 0.86 | 2.6  | 2    |      |
|        | FDEYFSQSCAPGSDPR                                |    |     | 0.78 | 4.2  | 2    |      |
|        | FFSASCVPGADK                                    |    |     | 1.11 | 3.1  | 2    |      |
|        | GEADAMSLDGGYVYTAGK                              |    |     | 0.94 | 4.2  | 2    |      |
|        | GEADAMSLDGGYVYTAGK+Oxidation(5)                 |    |     | 0.95 | 3.8  | 2    |      |
|        | GGSFQLNELQGLK                                   |    |     | 0.88 | 3.2  | 2    |      |
|        | IDSGLYLGSYFTAIQNLK                              |    |     | 0.87 | 5.2  | 2    |      |
|        | KGSFQLNELQGLK                                   |    |     | 0.89 | 3.1  | 3    |      |
|        | LRPVAAEVYGTGR                                   |    |     | 1.08 | 2.8  | 2    |      |
|        | NLLFNDNTECLAR                                   |    |     | 0.96 | 4.2  | 2    |      |
|        | RSDTSLTWNSVK                                    |    |     | 1.11 | 2.2  | 2    |      |
|        | SCHLAMAPNHAVVSR+Oxidation(5)                    |    |     | 1.22 | 3.4  | 3    |      |
|        | SNLALCIGDEQGENK                                 |    |     | 0.98 | 4.8  | 2    |      |
|        | SQSSDPDPNCVDRPVEGYLAVAVVR                       |    |     | 0.92 | 5.0  | 3    |      |
|        | SVQWCAVSQPEATK                                  |    |     | 1.02 | 4.3  | 2    |      |
|        | THYYAVAVVK                                      |    |     | 0.92 | 3.2  | 3    |      |
|        | VVWCAVGEQELR                                    |    |     | 0.90 | 3.1  | 2    |      |
|        | YLGPPYVAGITNLK                                  |    |     | 0.93 | 4.3  | 2    |      |
|        | YYGYTGAFR                                       |    |     | 0.88 | 2.4  | 2    |      |
| P02790 | HEMO Hemopexin                                  | 19 | 112 | 1007 | 0.95 | 0.07 | 1.00 |
|        | CSPHLVLSALTSNHNHATYAFSGTHYWR                    |    |     | 0.88 | 5.3  | 4    |      |
|        | DGWHSWPIAHQWPQGSAVDAAFSWEEK                     |    |     | 0.95 | 4.8  | 3    |      |
|        | DYFMPCPGR                                       |    |     | 0.87 | 2.1  | 2    |      |
|        | DYFMPCPGR+Oxidation(3)                          |    |     | 0.98 | 2.5  | 2    |      |
|        | EVGTPHGIILDSVDAAFICPGSSR                        |    |     | 0.97 | 5.8  | 2    |      |
|        | EWFWDLATGTMK                                    |    |     | 0.37 | 3.2  | 2    |      |
|        | EWFWDLATGTMK+Oxidation(10)                      |    |     | 0.51 | 3.2  | 2    |      |
|        | GECQAEGVLFQGDR                                  |    |     | 0.91 | 4.6  | 2    |      |
|        | GGYTLVSGYPK                                     |    |     | 1.06 | 3.8  | 2    |      |
|        | LLQDEFPGIPSPLDAAVECHR                           |    |     | 0.93 | 5.5  | 2    |      |
|        | LWWLDLK                                         |    |     | 0.88 | 2.5  | 2    |      |
|        | NFPSPVDAAFR                                     |    |     | 0.99 | 2.5  | 2    |      |

|        |                                              |   |    |     |      |      |      |
|--------|----------------------------------------------|---|----|-----|------|------|------|
|        | RLWWLDLK                                     |   |    |     | 0.92 | 2.8  | 2    |
|        | SGAQATWTELPWPHEK                             |   |    |     | 0.91 | 4.9  | 3    |
|        | SLGPNSCSANGPGLYLIHGPNLYCYSYDVEK              |   |    |     | 0.94 | 5.1  | 3    |
|        | VDGALCMEK                                    |   |    |     | 0.89 | 2.4  | 2    |
|        | VDGALCMEK+Oxidation(6)                       |   |    |     | 1.00 | 2.9  | 2    |
|        | VWVYPPEK                                     |   |    |     | 1.01 | 2.5  | 2    |
|        | YYCFQGNQFLR                                  |   |    |     | 0.95 | 3.6  | 2    |
| P02812 | PRB2 Basic salivary proline_rich protein 2   | 4 | 20 | 67  | 1.11 | 0.18 | 0.91 |
|        | SPPGKPPQGGNQPPPPGKPPPPQGGN                   |   |    |     | 1.35 | 4.7  | 4    |
|        | SPPGKPPQGGNQPPPPGKPPPPQGGNKPQPPPPGKPPPPQGGN  |   |    |     | 1.10 | 5.6  | 6    |
|        | SPPGKPPQGGNQPPPPGKPPPPQGGNKPQPPPPGKPPPPQGGN  |   |    |     | 1.11 | 5.5  | 6    |
|        | SPPGKPPQGGNQPPPPAGGNPQQPAPPAGQPPPPQGGRPSRPPQ |   |    |     | 0.96 | 4.2  | 5    |
| P03973 | SLPI Antileukoproteinase                     | 2 | 5  | 81  | 1.15 | 0.64 | 0.82 |
|        | CLDPVDTNPTR                                  |   |    |     | 0.99 | 3.0  | 2    |
|        | YKKPECQSDWQCPGK                              |   |    |     | 1.24 | 4.6  | 3    |
| P04003 | C4BPA C4b_binding protein alpha chain        | 2 | 2  | 17  | 0.96 | 0.34 | 0.31 |
|        | EDVYVVGTVLR                                  |   |    |     | 0.89 | 3.3  | 2    |
|        | FSAICQGDGTWSPR                               |   |    |     | 1.05 | 3.4  | 2    |
| P04004 | VTNC Vitronectin                             | 5 | 11 | 87  | 0.97 | 0.26 | 1.00 |
|        | DVWGIEGPIDAAFTR                              |   |    |     | 0.89 | 4.0  | 2    |
|        | DWHGVPGQVDAAMAGR                             |   |    |     | 1.03 | 2.6  | 2    |
|        | FEDGVLDPDYPR                                 |   |    |     | 1.03 | 3.7  | 2    |
|        | GQYCYELDEK                                   |   |    |     | 0.86 | 2.9  | 2    |
|        | SIAQYWLGCAPAGHL                              |   |    |     | 0.92 | 4.3  | 2    |
| P04075 | ALDOA Fructose_bisphosphate aldolase A       | 4 | 7  | 29  | 0.93 | 0.20 | 0.64 |
|        | GILAADESTGSIK                                |   |    |     | 1.00 | 3.4  | 2    |
|        | GVVPLAGTNGETTTQGLDGLSER                      |   |    |     | 0.93 | 5.4  | 2    |
|        | LQSIGTENENR                                  |   |    |     | 0.79 | 3.2  | 2    |
|        | YTPSGQAGAAASESLFVSNHAY                       |   |    |     | 1.01 | 2.7  | 2    |
| P04080 | CYTB Cystatin_B                              | 3 | 9  | 55  | 1.01 | 0.26 | 1.00 |
|        | SQVVAGTNYFIK                                 |   |    |     | 1.10 | 3.5  | 2    |
|        | VFQSLPHENKPLTSLSNYQTNK                       |   |    |     | 1.00 | 4.2  | 3    |
|        | VHVGDEDFVHLR                                 |   |    |     | 0.93 | 3.9  | 3    |
| P04083 | ANXA1 Annexin A1                             | 7 | 18 | 158 | 0.95 | 0.15 | 0.91 |
|        | AAYLQETGKPLDETLK                             |   |    |     | 1.22 | 3.2  | 2    |
|        | ALTGHLEEVVLLALK                              |   |    |     | 0.71 | 2.8  | 2    |
|        | DITSDTSGDFR                                  |   |    |     | 1.00 | 3.4  | 2    |
|        | GGPGSAVSPYPTFNPSSDVAALHK                     |   |    |     | 0.91 | 4.3  | 2    |
|        | GTDVNVFNTILTTR                               |   |    |     | 0.93 | 4.4  | 2    |
|        | GVDEATIIDLTK                                 |   |    |     | 0.93 | 4.5  | 3    |
|        | SEDFGVNEDLADSDAR                             |   |    |     | 0.97 | 4.9  | 2    |
| P04114 | APOB Apolipoprotein B_100                    | 7 | 10 | 38  | 0.97 | 0.20 | 0.97 |
|        | ATFQTPDFIVPLTDLR                             |   |    |     | 0.96 | 3.0  | 2    |
|        | IEGNLIFDPNNYLPK                              |   |    |     | 1.04 | 2.4  | 2    |
|        | ILGEELGFASLHDLQLLGK                          |   |    |     | 0.88 | 3.2  | 3    |
|        | TQFNNNEYSQDLDAYNTK                           |   |    |     | 1.52 | 2.2  | 2    |
|        | TSSFALNPLTLPEVK                              |   |    |     | 0.92 | 2.4  | 2    |
|        | VLLDQLGTTISFER                               |   |    |     | 0.93 | 3.4  | 2    |
|        | VNWEAAAASGLLTSK                              |   |    |     | 0.89 | 3.7  | 2    |
| P04196 | HRG Histidine_rich glycoprotein              | 5 | 13 | 82  | 0.95 | 0.18 | 1.00 |
|        | DGYLFQLLR                                    |   |    |     | 0.81 | 2.9  | 2    |
|        | HPLKPDNQFPQSVSESCPGK                         |   |    |     | 0.99 | 4.0  | 3    |
|        | KGEVLPLPEANFSPFPLPHHK                        |   |    |     | 0.94 | 5.5  | 3    |
|        | YKEENDDFASFR                                 |   |    |     | 1.01 | 3.6  | 2    |
|        | YWNDCEPPDSR                                  |   |    |     | 0.60 | 2.5  | 2    |
| P04217 | A1BG Alpha_1B_glycoprotein                   | 8 | 21 | 183 | 0.98 | 0.15 | 0.97 |
|        | ATWSGAVLAGR                                  |   |    |     | 0.96 | 4.0  | 2    |
|        | CEGPIPDVTFELLR                               |   |    |     | 0.52 | 2.7  | 2    |
|        | HQFLLTGDTQGR                                 |   |    |     | 1.05 | 3.7  | 3    |
|        | IFFHLNAVALGDGGHYTCR                          |   |    |     | 0.94 | 4.2  | 3    |
|        | NGVAQEPVHLDSPAIAK                            |   |    |     | 1.18 | 3.8  | 2    |
|        | SGLSTGWTQLSK                                 |   |    |     | 1.02 | 3.7  | 2    |
|        | SLPAPWLSMAPVSWITPGLK+Oxidation(8)            |   |    |     | 0.92 | 3.6  | 2    |
|        | VTLTCVAPLSGVDFQLR                            |   |    |     | 0.90 | 5.6  | 2    |
| P04220 | MUCB Ig mu heavy chain disease protein       | 6 | 14 | 155 | 0.99 | 0.18 | 1.00 |
|        | FTCTVHTDLPSPLK                               |   |    |     | 1.03 | 3.7  | 2    |
|        | GVALHRPDVYLLPPAR                             |   |    |     | 0.95 | 4.8  | 3    |

|        |                                                          |    |    |     |      |      |      |
|--------|----------------------------------------------------------|----|----|-----|------|------|------|
|        | LICQATGFSPR                                              |    |    |     | 1.00 | 2.3  | 2    |
|        | VSVFVPPR                                                 |    |    |     | 0.99 | 2.4  | 2    |
|        | YVTSAPMPEPQAPGR                                          |    |    |     | 0.87 | 2.6  | 2    |
|        | YVTSAPMPEPQAPGR+Oxidation(6)                             |    |    |     | 0.98 | 3.5  | 2    |
| P04264 | K2C1 Keratin_type II cytoskeletal 1                      | 15 | 28 | 158 | 0.78 | 0.18 | 0.01 |
|        | AQYEDIAQK                                                |    |    |     | 0.59 | 2.3  | 2    |
|        | EQIKSLNNQFASFIDK                                         |    |    |     | 0.99 | 2.2  | 2    |
|        | FLEQQNQVLQTK                                             |    |    |     | 0.66 | 4.3  | 2    |
|        | FSSCGGGGSGFGAGGGFGSR                                     |    |    |     | 0.66 | 4.2  | 2    |
|        | GGGGGGYSGGSSYSGGGSSYSGGGGGGGGR                           |    |    |     | 0.52 | 6.9  | 3    |
|        | GSYSGGSSYSGGGSSYSGGGGGGGHGSYSGSSSSGGYR                   |    |    |     | 0.52 | 6.1  | 3    |
|        | IEISELNR                                                 |    |    |     | 0.56 | 2.6  | 2    |
|        | LNDLEDALQQAQK                                            |    |    |     | 0.56 | 4.7  | 2    |
|        | LNDLEDALQQAQKEDLAR                                       |    |    |     | 1.02 | 2.1  | 2    |
|        | QISNLQQSISDAEQR                                          |    |    |     | 0.66 | 4.3  | 2    |
|        | SKAEAESLYQSK                                             |    |    |     | 0.59 | 3.7  | 2    |
|        | SLDLDSIIAEVK                                             |    |    |     | 0.53 | 4.7  | 2    |
|        | SLNNQFASFIDK                                             |    |    |     | 0.67 | 3.3  | 2    |
|        | TNAENEFVTIK                                              |    |    |     | 0.73 | 3.0  | 2    |
|        | WELLQQVDTSTR                                             |    |    |     | 0.86 | 3.6  | 2    |
| P04280 | PRP1 Basic salivary proline_rich protein 1               | 4  | 11 | 28  | 1.05 | 0.24 | 0.92 |
|        | APPGKPKGPPQEGNNPQGPPPPAGGNPQQPQAPPAGQPQGPFRPPQGGGRPSRPPQ |    |    |     | 0.90 | 6.2  | 5    |
|        | SPPGKPKGPPQGGNQPGPPPPGKPKGPPPPQGGNKPQGGPPPGKPKGPPPPQGDK  |    |    |     | 1.13 | 4.4  | 6    |
|        | SPPGKPKGPPQGGNQPGPPPPGKPKGPPPPQGGNRPQGGPPPGKPKGPPPPQGDK  |    |    |     | 1.16 | 4.1  | 6    |
|        | SPQSPGKPKGPPPPQGGNQPGPPPPGKPKGPPPPQGGNKPQGGPPPGKPKGPPPAQ |    |    |     | 1.09 | 4.1  | 6    |
| P04350 | TBB4 Tubulin beta_4 chain                                | 4  | 7  | 12  | 0.97 | 0.33 | 0.98 |
|        | ALTVPELTQQMFDKAK                                         |    |    |     | 0.86 | 3.2  | 2    |
|        | EIVHLQAGQCGNQIGAK                                        |    |    |     | 0.97 | 3.9  | 3    |
|        | FWEVISDEHGIDPTGTYHGDSLQLER                               |    |    |     | 1.14 | 3.1  | 3    |
|        | MAATFIGNSTAIQELFK+Oxidation(0)                           |    |    |     | 0.83 | 4.1  | 2    |
| P04406 | G3P Glyceraldehyde_3_phosphate dehydrogenase             | 6  | 14 | 57  | 1.03 | 0.20 | 0.62 |
|        | GALQNIIPASTGAAK                                          |    |    |     | 1.16 | 3.2  | 2    |
|        | GILGYTEHQVSSDFNSDTHSSTFDAGAGIALNDHFVK                    |    |    |     | 1.05 | 4.9  | 4    |
|        | IISNASCTTNCLAPLAK                                        |    |    |     | 1.06 | 4.1  | 2    |
|        | LISWYDNEFGYSNR                                           |    |    |     | 0.95 | 2.9  | 2    |
|        | VIHDNFGIVEGLMTTVHAITATQK                                 |    |    |     | 0.90 | 5.4  | 3    |
|        | VPTANVSVVDLTCR                                           |    |    |     | 0.98 | 2.3  | 2    |
| P04746 | AMYP Pancreatic alpha_amylase                            | 6  | 12 | 45  | 0.99 | 0.24 | 1.00 |
|        | AHFSISNSAEDPFIHAESK                                      |    |    |     | 1.06 | 4.2  | 3    |
|        | ALVFVDNHDNQR                                             |    |    |     | 1.04 | 2.9  | 2    |
|        | EVTINPDTTTCGNDWVCEHR                                     |    |    |     | 1.00 | 3.3  | 2    |
|        | IYVDAVINHMCGNAVSAGTSSTCGSYFNPGSR                         |    |    |     | 0.97 | 3.4  | 3    |
|        | TGSGDIENYNDATQVR                                         |    |    |     | 0.95 | 4.3  | 2    |
|        | WVDIALECER                                               |    |    |     | 0.86 | 2.3  | 2    |
| P04792 | HSPB1 Heat shock protein beta_1                          | 3  | 7  | 24  | 0.97 | 0.26 | 1.00 |
|        | LATQSNEITIPVTFESR                                        |    |    |     | 0.98 | 3.7  | 2    |
|        | LFDQAFGLPR                                               |    |    |     | 0.97 | 2.1  | 2    |
|        | VSLDVNHFAPELTVK                                          |    |    |     | 0.96 | 3.5  | 2    |
| P05091 | ALDH2 Aldehyde dehydrogenase_mitochondrial               | 7  | 11 | 49  | 1.00 | 0.16 | 0.97 |
|        | ANNSTYGLAAAVFTK                                          |    |    |     | 0.98 | 4.1  | 2    |
|        | EAGFPPGVVNIIVPGFGPTAGAAIASHEDVDK                         |    |    |     | 0.98 | 3.6  | 3    |
|        | EEIFGPVMQILK+Oxidation(7)                                |    |    |     | 1.00 | 3.0  | 2    |
|        | ELGEYGLQAYTEVK                                           |    |    |     | 1.02 | 3.4  | 2    |
|        | TEQGPQVDETQFK                                            |    |    |     | 0.99 | 3.8  | 2    |
|        | VAFTGSTEIGR                                              |    |    |     | 0.84 | 2.9  | 2    |
|        | VIQVAAGSSNLK                                             |    |    |     | 1.34 | 3.5  | 2    |
| P05109 | S10A8 Protein S100_A8                                    | 2  | 4  | 30  | 1.00 | 0.37 | 1.00 |
|        | ALNSIIDVYHK                                              |    |    |     | 1.02 | 3.3  | 2    |
|        | LLETECPQYIR                                              |    |    |     | 0.98 | 3.4  | 2    |
| P05155 | IC1 Plasma protease C1 inhibitor                         | 15 | 51 | 586 | 0.96 | 0.09 | 1.00 |
|        | DFTCVHQALK                                               |    |    |     | 1.04 | 3.2  | 2    |
|        | FQPTLLTLPR                                               |    |    |     | 0.95 | 2.7  | 2    |
|        | GVTSVSQIFHSPDLAIR                                        |    |    |     | 0.99 | 4.9  | 2    |
|        | HRLEDMEQALSPSVFK                                         |    |    |     | 0.94 | 5.1  | 3    |
|        | HRLEDMEQALSPSVFK+Oxidation(5)                            |    |    |     | 0.96 | 3.6  | 3    |
|        | KYPVAHFIDQTLK                                            |    |    |     | 1.02 | 4.0  | 3    |
|        | LEDMEQALSPSVFK                                           |    |    |     | 0.95 | 4.6  | 2    |

|        |                                                       |    |    |     |      |      |      |
|--------|-------------------------------------------------------|----|----|-----|------|------|------|
|        | LEDMEQALSPSVFK+Oxidation(3)                           |    |    |     | 0.92 | 3.7  | 2    |
|        | LLDSLPSDTR                                            |    |    |     | 1.00 | 3.3  | 2    |
|        | TLYSSSPR                                              |    |    |     | 1.08 | 2.2  | 2    |
|        | TNLESILSYPK                                           |    |    |     | 0.93 | 4.2  | 2    |
|        | VTTSQDMLSIMEK                                         |    |    |     | 0.91 | 3.5  | 2    |
|        | VTTSQDMLSIMEK+Oxidation(10)                           |    |    |     | 0.94 | 3.1  | 2    |
|        | VTTSQDMLSIMEK+Oxidation(6)                            |    |    |     | 0.94 | 3.1  | 2    |
|        | VTTSQDMLSIMEK+Oxidation(6),Oxidation(10)              |    |    |     | 0.89 | 2.7  | 2    |
| P05156 | CFAI Complement factor I                              | 10 | 17 | 123 | 0.95 | 0.15 | 1.00 |
|        | ACDGINDCGDQSDDELCK                                    |    |    |     | 0.99 | 5.7  | 2    |
|        | AQLGDLPWQVAIK                                         |    |    |     | 0.95 | 3.8  | 2    |
|        | EANVACLDLGFQQGADTQR                                   |    |    |     | 0.95 | 5.9  | 2    |
|        | GLETSLAECTFTK                                         |    |    |     | 0.98 | 4.2  | 2    |
|        | HGNTDSEGIVEVK                                         |    |    |     | 0.95 | 3.3  | 2    |
|        | TMGYQDFADVVCYTQK                                      |    |    |     | 0.90 | 4.4  | 2    |
|        | VFCQPWQR                                              |    |    |     | 0.92 | 2.2  | 2    |
|        | VFSLQWGEVK                                            |    |    |     | 0.89 | 3.1  | 2    |
|        | VTYTSQEDLVEK                                          |    |    |     | 0.97 | 2.6  | 2    |
|        | YQIWTTVVDWIHPDLK                                      |    |    |     | 0.87 | 3.9  | 3    |
| P05186 | PPBT Alkaline phosphatase_ tissue_nonspecific isozyme | 3  | 7  | 34  | 0.86 | 0.33 | 0.73 |
|        | ANEGTVGVSAATER                                        |    |    |     | 0.90 | 3.6  | 2    |
|        | HETHGGEDVAVFSK                                        |    |    |     | 0.98 | 3.9  | 3    |
|        | LDGLDLVDTWK                                           |    |    |     | 0.37 | 3.8  | 2    |
| P05362 | ICAM1 Intercellular adhesion molecule 1               | 10 | 18 | 200 | 0.95 | 0.11 | 1.00 |
|        | ASVSVTAEDGTQR                                         |    |    |     | 0.92 | 4.0  | 2    |
|        | DGTFPLPIGESVTVTR                                      |    |    |     | 0.97 | 3.5  | 2    |
|        | DLEGTYLGR                                             |    |    |     | 0.80 | 2.4  | 2    |
|        | EPAVGEPAEVTTTVLVR                                     |    |    |     | 0.96 | 3.0  | 2    |
|        | GGSVLVCSTSCDQPK                                       |    |    |     | 0.95 | 4.4  | 2    |
|        | LLGIETPLPK                                            |    |    |     | 0.94 | 2.8  | 2    |
|        | REPAVGEPAEVTTTVLVR                                    |    |    |     | 0.92 | 3.7  | 2    |
|        | SFSCSATLEVAGQLHK                                      |    |    |     | 0.94 | 3.7  | 2    |
|        | VELAPLPSWQPVGK                                        |    |    |     | 0.97 | 3.4  | 2    |
|        | VTLNGVPAQPLGPR                                        |    |    |     | 1.09 | 2.9  | 2    |
| P05452 | TETN Tetranectin                                      | 6  | 7  | 44  | 0.94 | 0.21 | 0.98 |
|        | GGTLGTPQTGSENDALYEYLR                                 |    |    |     | 0.75 | 2.6  | 2    |
|        | LDTLAQEVALLK                                          |    |    |     | 0.92 | 4.1  | 2    |
|        | NWETEITAQPDGGK                                        |    |    |     | 0.92 | 3.4  | 2    |
|        | SRLDTLAQEVALLK                                        |    |    |     | 1.05 | 2.5  | 2    |
|        | TENCAVLSGAANGK                                        |    |    |     | 0.91 | 4.0  | 2    |
|        | TFHEASEDCISR                                          |    |    |     | 0.91 | 3.3  | 3    |
| P05543 | THBG Thyroxine_binding globulin                       | 3  | 5  | 16  | 0.98 | 0.23 | 0.84 |
|        | FSISATYDLGATLLK                                       |    |    |     | 1.10 | 2.6  | 2    |
|        | GTEAAAVPEVELSDQPENTFLHPIIQIDR                         |    |    |     | 0.91 | 3.9  | 3    |
|        | QEINSHVEMQTK+Oxidation(8)                             |    |    |     | 1.04 | 2.6  | 2    |
| P05997 | CO5A2 Collagen alpha-2(V) chain                       | 3  | 3  | 4   | 1.02 | 0.33 | 0.56 |
|        | AGMPGTRGPPGDPGPEGK                                    |    |    |     | 0.94 | 2.2  | 2    |
|        | QGPMGVIGRQGTGAPGPPGDPGPGQDEGPDGK                      |    |    |     | 0.93 | 3.1  | 3    |
|        | TPASLQADKTVR                                          |    |    |     | 1.18 | 1.8  | 1    |
| P06310 | KV206 Ig kappa chain V_II region RPMI 6410            | 2  | 11 | 94  | 1.02 | 0.24 | 1.00 |
|        | FSGSGSGTDFTLK                                         |    |    |     | 1.05 | 3.8  | 2    |
|        | FSGSGSGTDFTLKISR                                      |    |    |     | 0.94 | 3.4  | 2    |
| P06314 | KV404 Ig kappa chain V_IV region B17                  | 2  | 4  | 41  | 0.96 | 0.27 | 0.75 |
|        | LLIYWASTR                                             |    |    |     | 0.79 | 2.9  | 2    |
|        | NYLAWYQQKPGQPPK                                       |    |    |     | 1.01 | 3.7  | 2    |
| P06331 | HV209 Ig heavy chain V_II region ARH_77               | 2  | 5  | 36  | 0.99 | 0.28 | 1.00 |
|        | LSSVTAADTAVYYCAR                                      |    |    |     | 0.89 | 4.5  | 2    |
|        | VTISLDTSK                                             |    |    |     | 1.01 | 2.3  | 2    |
| P06396 | GELS Gelsolin                                         | 15 | 31 | 196 | 0.97 | 0.13 | 1.00 |
|        | AGALNSNDAFVLK                                         |    |    |     | 0.98 | 3.9  | 2    |
|        | AGKEPGLQIWR                                           |    |    |     | 0.92 | 3.4  | 3    |
|        | AQPVQVAEGSEPDGFWEALGGK                                |    |    |     | 0.98 | 6.0  | 2    |
|        | DPDQTDGLGLSYLSSHIANVER                                |    |    |     | 0.98 | 5.5  | 3    |
|        | DSQEEEEKTEALSAK                                       |    |    |     | 0.82 | 5.0  | 3    |
|        | EVQGFESATFLGYFK                                       |    |    |     | 0.64 | 4.0  | 2    |
|        | HVVPNEVVVQR                                           |    |    |     | 1.12 | 2.7  | 2    |



|        |                                        |    |    |     |      |      |      |
|--------|----------------------------------------|----|----|-----|------|------|------|
|        | NWRDPDQTDGLGLSYLSSHIANVER              |    |    |     | 1.12 | 5.6  | 3    |
|        | QTQVSVLPEGGETPLFK                      |    |    |     | 1.06 | 4.0  | 2    |
|        | SEDCFILDHGK                            |    |    |     | 0.90 | 3.1  | 3    |
|        | TGAQELLR                               |    |    |     | 0.92 | 2.8  | 2    |
|        | TPSAAYLWVGTGASEAEK                     |    |    |     | 0.96 | 5.3  | 2    |
|        | VSNGAGTMSVSLVADENPFAQGALK              |    |    |     | 1.02 | 4.6  | 2    |
|        | VSNGAGTMSVSLVADENPFAQGALK+Oxidation(7) |    |    |     | 0.91 | 4.2  | 2    |
|        | YIETDPANR                              |    |    |     | 0.91 | 2.3  | 2    |
| P06681 | CO2 Complement C2                      | 11 | 18 | 102 | 0.95 | 0.15 | 0.01 |
|        | AVISPGFDVFAK                           |    |    |     | 0.93 | 2.6  | 2    |
|        | CSSNLVLTGSSER                          |    |    |     | 1.00 | 3.6  | 2    |
|        | DFHINLFR                               |    |    |     | 0.94 | 2.8  | 2    |
|        | ECQNGVWVSGTEPICR                       |    |    |     | 0.98 | 3.3  | 2    |
|        | EVVTDQFLCSGTQEDES PCKGESGGAVFLER       |    |    |     | 0.99 | 5.3  | 3    |
|        | GESGGAVFLER                            |    |    |     | 0.76 | 2.8  | 2    |
|        | HAFILQDTK                              |    |    |     | 0.91 | 2.4  | 2    |
|        | HAIILLTDGK                             |    |    |     | 0.95 | 2.6  | 2    |
|        | MGVEWTSCAEVVSQEK                       |    |    |     | 1.00 | 2.7  | 2    |
|        | SSGQWQTPGATR                           |    |    |     | 0.84 | 2.2  | 2    |
|        | VLMSVLNDNSR+Oxidation(2)               |    |    |     | 1.06 | 1.9  | 1    |
| P06702 | S10A9 Protein S100_A9                  | 5  | 13 | 116 | 0.99 | 0.21 | 1.00 |
|        | LGHPTLNQGEFK                           |    |    |     | 1.04 | 3.2  | 3    |
|        | MHEGDEGPGHHHKPGLGEGTP+Oxidation(0)     |    |    |     | 1.02 | 3.3  | 3    |
|        | NIETIINTFHQYSVK                        |    |    |     | 1.00 | 4.7  | 2    |
|        | VIEHIMEDLDTNADK                        |    |    |     | 0.87 | 4.8  | 2    |
|        | VIEHIMEDLDTNADK+Oxidation(5)           |    |    |     | 1.01 | 3.6  | 2    |
| P06727 | APOA4 Apolipoprotein A_IV              | 14 | 25 | 153 | 0.94 | 0.13 | 0.98 |
|        | DKVNSFFSTFK                            |    |    |     | 0.76 | 2.9  | 2    |
|        | ENADSLQASLRPHADELK                     |    |    |     | 0.82 | 2.9  | 2    |
|        | IDQNVEELK                              |    |    |     | 0.94 | 2.2  | 2    |
|        | ISASAEELR                              |    |    |     | 0.88 | 2.3  | 2    |
|        | KLVPFATELHER                           |    |    |     | 0.92 | 3.9  | 3    |
|        | LGEVNTYAGDLQK                          |    |    |     | 1.07 | 4.0  | 2    |
|        | LGPHAGDVEGHLSFLEK                      |    |    |     | 1.00 | 4.0  | 3    |
|        | LKEEIGKELEELR                          |    |    |     | 0.94 | 4.2  | 3    |
|        | RVEPYGENFNK                            |    |    |     | 1.16 | 3.2  | 2    |
|        | SELTQQLNALFQDK                         |    |    |     | 0.87 | 4.8  | 2    |
|        | SLAELGGHLDQQVEEFR                      |    |    |     | 0.93 | 4.2  | 3    |
|        | SLAELGGHLDQQVEEFRR                     |    |    |     | 1.00 | 3.4  | 3    |
|        | SLAPYAQDTQEK                           |    |    |     | 0.87 | 3.2  | 2    |
|        | TQVNTQAEQLR                            |    |    |     | 0.91 | 3.3  | 2    |
| P06733 | ENOA Alpha_enolase                     | 7  | 15 | 97  | 0.99 | 0.15 | 1.00 |
|        | DATNVGDEGGFAPNILENK                    |    |    |     | 1.05 | 4.2  | 2    |
|        | FTASAGIQVVGDDLTVTNPK                   |    |    |     | 0.98 | 4.4  | 2    |
|        | HIADLAGNSEVILPVPAFNVINGGSHAGNK         |    |    |     | 0.97 | 4.5  | 3    |
|        | IEEELGSK                               |    |    |     | 0.94 | 2.1  | 2    |
|        | IGAEVYHNLK                             |    |    |     | 1.06 | 3.3  | 3    |
|        | VNQIGSVTESLQACK                        |    |    |     | 0.99 | 4.9  | 2    |
|        | YISPDQLADLYK                           |    |    |     | 0.95 | 3.5  | 2    |
| P06744 | G6PI Glucose_6_phosphate isomerase     | 3  | 5  | 31  | 0.96 | 0.30 | 1.00 |
|        | HFVALSTNTTK                            |    |    |     | 0.97 | 2.3  | 2    |
|        | TFTTQETITNAETAK                        |    |    |     | 1.00 | 4.2  | 2    |
|        | VWYVSNIDGTHIAK                         |    |    |     | 0.91 | 2.7  | 2    |
| P07195 | LDHB L_lactate dehydrogenase B chain   | 2  | 4  | 20  | 1.05 | 0.40 | 0.94 |
|        | LIAPVAEEEEATVPNNK                      |    |    |     | 1.10 | 3.5  | 2    |
|        | MVVESAYEVIK+Oxidation(0)               |    |    |     | 0.90 | 2.2  | 2    |
| P07205 | PGK2 Phosphoglycerate kinase 2         | 3  | 6  | 24  | 0.90 | 0.21 | 0.50 |
|        | FHVVEEGK                               |    |    |     | 1.01 | 2.4  | 2    |
|        | LGDVYVNDAFGTAHR                        |    |    |     | 0.91 | 3.7  | 2    |
|        | VNEMIIGGGMAYTLK+Oxidation(9)           |    |    |     | 0.87 | 2.2  | 2    |
| P07339 | CATD Cathepsin D                       | 8  | 17 | 57  | 0.95 | 0.15 | 0.99 |
|        | AIGAVPLIQGEYMIPCEK+Oxidation(12)       |    |    |     | 0.95 | 3.4  | 2    |
|        | AYWQVHLDQVEVASGLTLCK                   |    |    |     | 0.91 | 3.3  | 3    |
|        | DPDAQPGGELMLGGTDSK                     |    |    |     | 1.09 | 3.2  | 2    |
|        | DPDAQPGGELMLGGTDSK+Oxidation(10)       |    |    |     | 0.85 | 3.0  | 2    |
|        | FDGILGMAYPR                            |    |    |     | 0.99 | 3.7  | 2    |
|        | FDGILGMAYPR+Oxidation(6)               |    |    |     | 0.93 | 2.9  | 2    |

|        |                                                |   |    |     |      |      |      |
|--------|------------------------------------------------|---|----|-----|------|------|------|
|        | VGFAEAAR                                       |   |    |     | 0.91 | 2.2  | 2    |
|        | VSTLPAITLK                                     |   |    |     | 1.03 | 2.3  | 2    |
| P07355 | ANXA2 Annexin A2                               | 2 | 6  | 33  | 0.99 | 0.29 | 1.00 |
|        | GVDEVTIVNILTNR                                 |   |    |     | 0.97 | 4.5  | 2    |
|        | QDIAFAYQR                                      |   |    |     | 1.01 | 2.7  | 2    |
| P07357 | CO8A Complement component C8 alpha chain       | 3 | 9  | 39  | 1.01 | 0.28 | 0.96 |
|        | AIDEDCSQYEPIPGSQK                              |   |    |     | 1.06 | 3.8  | 2    |
|        | FGGTICSGDIWDQASCSSSTTCVR                       |   |    |     | 0.97 | 4.6  | 2    |
|        | LGSLGAACEQTQTEGAK                              |   |    |     | 0.98 | 3.8  | 2    |
| P07360 | CO8G Complement component C8 gamma chain       | 2 | 6  | 35  | 1.00 | 0.21 | 1.00 |
|        | SLPVSDSVLSGFQQR                                |   |    |     | 1.04 | 4.4  | 2    |
|        | VQEAHLTEDQIFYFPK                               |   |    |     | 0.98 | 4.1  | 3    |
| P07437 | TBB5 Tubulin beta chain                        | 5 | 7  | 15  | 0.97 | 0.32 | 1.00 |
|        | EIVHIQAGQCGNQIGAK                              |   |    |     | 0.97 | 3.9  | 3    |
|        | GHYTEGAELVDSVLDVVR                             |   |    |     | 0.98 | 3.6  | 3    |
|        | ISEQFTAMFR                                     |   |    |     | 1.07 | 2.9  | 2    |
|        | SGPFGQIFRPDNFVFGQSGAGNNWAK                     |   |    |     | 0.94 | 5.8  | 3    |
|        | YLTVAAVFR                                      |   |    |     | 0.92 | 2.5  | 2    |
| P07737 | PROF1 Profilin_1                               | 6 | 21 | 165 | 0.96 | 0.16 | 1.00 |
|        | DSLLQDGEFSMDLR                                 |   |    |     | 1.00 | 3.6  | 2    |
|        | DSLLQDGEFSMDLR+Oxidation(10)                   |   |    |     | 0.95 | 3.1  | 2    |
|        | DSPSVWAAVPGK                                   |   |    |     | 1.01 | 3.0  | 2    |
|        | SSFYVNGLTGGQK                                  |   |    |     | 0.87 | 4.0  | 2    |
|        | STGGAPTFNVTVK                                  |   |    |     | 1.00 | 3.5  | 2    |
|        | TFVNITPAEVGLVGK                                |   |    |     | 0.95 | 4.8  | 2    |
| P07858 | CATB Cathepsin B                               | 3 | 6  | 31  | 0.98 | 0.26 | 1.00 |
|        | GQDHCGIESEVVAGIPR                              |   |    |     | 1.01 | 4.5  | 2    |
|        | HYGNSYSVSNSEK                                  |   |    |     | 0.96 | 4.4  | 2    |
|        | ICEPGYSPTYK                                    |   |    |     | 0.95 | 2.5  | 2    |
| P07900 | HS90A Heat shock protein HSP 90_alpha          | 4 | 9  | 68  | 0.97 | 0.23 | 0.96 |
|        | DQVANSAFVER                                    |   |    |     | 0.99 | 2.6  | 2    |
|        | HIYYITGETK                                     |   |    |     | 0.98 | 3.2  | 2    |
|        | HLEINPDHSIETLR                                 |   |    |     | 0.88 | 3.7  | 3    |
|        | NPDDITNEEYGEFYK                                |   |    |     | 1.00 | 4.2  | 2    |
| P07951 | TPM2 Tropomyosin beta chain                    | 2 | 2  | 2   | 0.89 | 0.55 | 0.76 |
|        | KLVILEGELERSEER                                |   |    |     | 0.91 | 2.4  | 2    |
|        | MELQEMQLK+Oxidation(0),Oxidation(5)            |   |    |     | 0.81 | 2.1  | 1    |
| P07988 | PSPB Pulmonary surfactant-associated protein B | 7 | 18 | 98  | 0.94 | 0.15 | 1.00 |
|        | EAlFQDQDTR+Oxidation(7)                        |   |    |     | 0.89 | 2.4  | 2    |
|        | FLEQECCNVLPLK                                  |   |    |     | 0.90 | 3.5  | 2    |
|        | GALAVAVAQVCR                                   |   |    |     | 0.97 | 3.3  | 2    |
|        | GWDAHTTCQALGVCGTMSPLQCIHSPDL+Oxidation(16)     |   |    |     | 1.03 | 5.5  | 3    |
|        | QFVEQHTPQLLTLVPR                               |   |    |     | 0.95 | 3.4  | 3    |
|        | VVPLVAGGICQCLAER                               |   |    |     | 0.93 | 4.7  | 2    |
|        | YSVILLDTLLGR                                   |   |    |     | 0.30 | 3.5  | 2    |
| P07998 | RNAS1 Ribonuclease pancreatic                  | 2 | 7  | 30  | 0.98 | 0.30 | 0.95 |
|        | CKPVNTFVHEPLVDVQNVCFQEK                        |   |    |     | 0.88 | 3.6  | 3    |
|        | HIIVACEGSPYVPVHFDAFVEDST                       |   |    |     | 1.04 | 4.1  | 3    |
| P08107 | HSP71 Heat shock 70 kDa protein 1A/1B          | 6 | 9  | 41  | 1.02 | 0.21 | 1.00 |
|        | AQIHDLVVGSTR                                   |   |    |     | 0.97 | 3.1  | 2    |
|        | DAGVIAGLNVLNR                                  |   |    |     | 1.00 | 3.5  | 2    |
|        | EIAEAYLGYPVTNAVITVPAYFNDSQR                    |   |    |     | 1.17 | 3.6  | 3    |
|        | ELEQVCNPIISGLYQGAGGPGGFGAQQGPK                 |   |    |     | 0.93 | 4.5  | 3    |
|        | NQVALNPQNTVFDAK                                |   |    |     | 1.06 | 4.3  | 2    |
|        | YKAEDDEVQR                                     |   |    |     | 1.00 | 3.0  | 2    |
| P08185 | CBG Corticosteroid-binding globulin            | 5 | 7  | 37  | 0.99 | 0.39 | 1.00 |
|        | AVLQLNEEGVDTAGSTGVTNLNLSKPIILR                 |   |    |     | 1.01 | 3.4  | 3    |
|        | EENFYVDETTVVK                                  |   |    |     | 0.82 | 3.1  | 2    |
|        | GTWTQPFDLASTR                                  |   |    |     | 0.96 | 2.3  | 2    |
|        | SETEIHQQGFQHLHQLFAK                            |   |    |     | 1.17 | 4.4  | 3    |
|        | WSAGLTSSQVDLYIPK                               |   |    |     | 0.87 | 3.7  | 2    |
| P08238 | HS90B Heat shock protein HSP 90_beta           | 9 | 13 | 71  | 0.98 | 0.16 | 1.00 |
|        | ADLNNLGTIAK                                    |   |    |     | 1.08 | 3.8  | 2    |
|        | EDQTEYLEER                                     |   |    |     | 0.75 | 2.9  | 2    |
|        | EKEISDDEAEEEEKGEK                              |   |    |     | 0.97 | 2.3  | 2    |
|        | ELISNASDALDK                                   |   |    |     | 1.24 | 2.4  | 2    |
|        | EQVANSAFVER                                    |   |    |     | 0.96 | 2.1  | 2    |

|        |       |                                       |    |    |      |      |      |      |
|--------|-------|---------------------------------------|----|----|------|------|------|------|
|        |       |                                       |    |    | 0.99 | 4.3  | 2    |      |
|        |       |                                       |    |    | 0.97 | 3.6  | 3    |      |
|        |       |                                       |    |    | 0.94 | 3.0  | 2    |      |
|        |       |                                       |    |    | 0.91 | 2.5  | 2    |      |
| P08571 | CD14  | Monocyte differentiation antigen CD14 | 3  | 6  | 33   | 0.97 | 0.26 | 1.00 |
|        |       | AFPALTSLDLSDNPGLGER                   |    |    | 0.93 | 3.7  | 2    |      |
|        |       | LTVGAAQVPAQLLVGALR                    |    |    | 0.98 | 4.1  | 2    |      |
|        |       | VLSIAQAHSPAFCSEQVR                    |    |    | 0.97 | 3.9  | 3    |      |
| P08603 | CFAH  | Complement factor H                   | 14 | 26 | 108  | 0.94 | 0.14 | 1.00 |
|        |       | AGEQVTYTCATYYK                        |    |    | 0.94 | 4.3  | 2    |      |
|        |       | KGEWVALNPLR                           |    |    | 0.99 | 3.2  | 2    |      |
|        |       | LGYVTADGETSGSITCGK                    |    |    | 0.89 | 4.6  | 2    |      |
|        |       | LSYTCEGGFR                            |    |    | 0.98 | 2.6  | 2    |      |
|        |       | NTEILTGSWSDQTYPEGTQAIYK               |    |    | 1.04 | 4.4  | 2    |      |
|        |       | SITCIHGVTQLPQCVAIDK                   |    |    | 0.97 | 3.9  | 3    |      |
|        |       | SPDVINGSPISQK                         |    |    | 0.91 | 2.3  | 2    |      |
|        |       | SPPEISHGVVAHMSDSYQYGEEVYK             |    |    | 0.87 | 4.1  | 3    |      |
|        |       | SSIDIENGFISESQYTYALK                  |    |    | 1.03 | 2.6  | 2    |      |
|        |       | SSNLIILEEHLK                          |    |    | 0.88 | 2.7  | 2    |      |
|        |       | TDCLSLPSFENAIPMGEK                    |    |    | 0.86 | 2.6  | 2    |      |
|        |       | TGESVEFVCK                            |    |    | 0.91 | 3.0  | 2    |      |
|        |       | VSVLCQENYLIQEGEEITCK                  |    |    | 0.87 | 4.0  | 2    |      |
|        |       | WQSIPLCVEK                            |    |    | 0.91 | 2.2  | 2    |      |
| P08670 | VIME  | Vimentin                              | 15 | 29 | 177  | 0.97 | 0.15 | 1.00 |
|        |       | DGQVINETSQHDDLE                       |    |    | 0.99 | 3.7  | 2    |      |
|        |       | EEAENTLQSFR                           |    |    | 1.05 | 3.1  | 2    |      |
|        |       | EMEENFAVEAANYQDTIGR                   |    |    | 1.14 | 4.4  | 2    |      |
|        |       | EMEENFAVEAANYQDTIGR+Oxidation(1)      |    |    | 0.86 | 3.9  | 2    |      |
|        |       | EYQDLLNVK                             |    |    | 0.99 | 2.1  | 1    |      |
|        |       | FADLSEAANR                            |    |    | 0.93 | 3.1  | 2    |      |
|        |       | ILLAELEQLK                            |    |    | 0.84 | 3.5  | 2    |      |
|        |       | ISLPLPNFSSLNLR                        |    |    | 0.81 | 2.3  | 2    |      |
|        |       | KVESLQEEIAFLK                         |    |    | 0.91 | 4.1  | 3    |      |
|        |       | LHEEEIQELQAQIQEQHVQIDVDVSKPDLTAALR    |    |    | 1.08 | 5.9  | 4    |      |
|        |       | LLQDSVDFSLADAINTEFK                   |    |    | 0.94 | 3.6  | 2    |      |
|        |       | NLQEAEEWYK                            |    |    | 0.87 | 3.3  | 2    |      |
|        |       | QVQSLTCEVDALK                         |    |    | 1.00 | 3.4  | 2    |      |
|        |       | SLYASSPGGVYATR                        |    |    | 1.01 | 3.9  | 2    |      |
|        |       | VELQELNDR                             |    |    | 0.90 | 2.6  | 2    |      |
| P08758 | ANXA5 | Annexin A5                            | 9  | 13 | 83   | 0.99 | 0.15 | 0.99 |
|        |       | ALLLLCGEDD                            |    |    | 0.95 | 1.9  | 1    |      |
|        |       | DLLDDLKSELTK                          |    |    | 0.98 | 3.9  | 2    |      |
|        |       | ETSGNLEQLLAVVK                        |    |    | 1.27 | 2.9  | 2    |      |
|        |       | FITIFGTR                              |    |    | 0.88 | 2.4  | 2    |      |
|        |       | GLGTDEESILTLTISR                      |    |    | 0.78 | 4.1  | 2    |      |
|        |       | GTVTDFPGFDER                          |    |    | 1.01 | 3.3  | 2    |      |
|        |       | LYDAYELK                              |    |    | 0.94 | 2.6  | 2    |      |
|        |       | QVYEEYGSSEDDVVGDTSGYYQR               |    |    | 1.33 | 5.2  | 2    |      |
|        |       | VLTEIIASR                             |    |    | 0.99 | 2.4  | 2    |      |
| P09210 | GSTA2 | Glutathione S_transferase A2          | 2  | 2  | 25   | 0.95 | 0.54 | 0.66 |
|        |       | SAEDLDKLR                             |    |    | 0.83 | 2.8  | 2    |      |
|        |       | SHGQDYLVGNK                           |    |    | 1.07 | 3.1  | 2    |      |
| P09211 | GSTP1 | Glutathione S_transferase P           | 10 | 26 | 142  | 0.94 | 0.19 | 1.00 |
|        |       | AFLASPEYVNLPIGNGK                     |    |    | 0.93 | 5.7  | 2    |      |
|        |       | ALPGQLKPFETLLSQNQGGK                  |    |    | 0.90 | 4.7  | 3    |      |
|        |       | ASCLYGQLPK                            |    |    | 1.06 | 3.0  | 2    |      |
|        |       | DQQEAALVDMVNDGVEDLR                   |    |    | 0.91 | 6.0  | 2    |      |
|        |       | DQQEAALVDMVNDGVEDLR+Oxidation(9)      |    |    | 0.94 | 4.0  | 2    |      |
|        |       | EEVTVETWQEGSLK                        |    |    | 0.90 | 4.3  | 2    |      |
|        |       | FQDGLTLTYSNTILR                       |    |    | 0.70 | 5.3  | 2    |      |
|        |       | MLLADQGSWK+Oxidation(0)               |    |    | 1.00 | 2.9  | 2    |      |
|        |       | YISLIYTNYEAGK                         |    |    | 0.89 | 2.3  | 2    |      |
|        |       | YISLIYTNYEAGKDDYVK                    |    |    | 0.79 | 4.8  | 2    |      |
| P09382 | LEG1  | Galectin_1                            | 2  | 5  | 22   | 1.01 | 0.33 | 0.94 |
|        |       | DSNNLCLHFNPR                          |    |    | 1.11 | 2.6  | 2    |      |
|        |       | FNAHGDANTIVCNSK                       |    |    | 0.97 | 4.4  | 2    |      |
| P09467 | F16P1 | Fructose_1_6_bisphosphatase 1         | 8  | 12 | 65   | 0.95 | 0.19 | 0.98 |

|        |                                            |    |    |     |      |      |      |
|--------|--------------------------------------------|----|----|-----|------|------|------|
|        | AGIAHLYGIAGSTNVTGDQVK                      |    |    |     | 0.92 | 4.9  | 2    |
|        | APVILGSPDDVLEFLK                           |    |    |     | 0.70 | 3.3  | 2    |
|        | DFDPAVTEYIQR                               |    |    |     | 0.76 | 3.3  | 2    |
|        | EAVLDVIPTDIHQQR                            |    |    |     | 1.09 | 3.1  | 2    |
|        | GTGELTQLLNSLCTAVK                          |    |    |     | 0.91 | 4.8  | 2    |
|        | HAIIVEPEKR                                 |    |    |     | 0.80 | 3.2  | 3    |
|        | KAGIAHLYGIAGSTNVTGDQVK                     |    |    |     | 1.12 | 3.7  | 3    |
|        | SSFATCVLVSEEDKHAIIVEPEKR                   |    |    |     | 1.02 | 4.5  | 3    |
| P09525 | ANXA4 Annexin A4                           | 2  | 2  | 7   | 0.95 | 0.47 | 0.83 |
|        | DEGNYLDDALVR                               |    |    |     | 1.01 | 3.0  | 2    |
|        | VLVLSL SAGGR                               |    |    |     | 0.87 | 2.5  | 2    |
| P09668 | CATH Pro_cathepsin H                       | 3  | 9  | 48  | 0.97 | 0.28 | 1.00 |
|        | GIMGEDTYPYQGK                              |    |    |     | 1.03 | 3.0  | 2    |
|        | GIMGEDTYPYQGK+Oxidation(2)                 |    |    |     | 0.92 | 3.0  | 2    |
|        | VNHAVLAVGYGEK                              |    |    |     | 1.01 | 3.8  | 2    |
| P09960 | LKHA4 Leukotriene A <sub>4</sub> hydrolase | 11 | 24 | 124 | 0.94 | 0.12 | 1.00 |
|        | DGETPDPEPDSR                               |    |    |     | 0.88 | 2.7  | 2    |
|        | DLSSHQLNEFLAQT LQR                         |    |    |     | 0.85 | 3.2  | 3    |
|        | EDDLNSFNATDLK                              |    |    |     | 1.11 | 3.7  | 2    |
|        | GSPMEISLP IALSK                            |    |    |     | 0.91 | 3.7  | 2    |
|        | GSPMEISLP IALSK+Oxidation(3)               |    |    |     | 0.88 | 3.0  | 2    |
|        | LTYTAEVSVPK                                |    |    |     | 0.94 | 3.3  | 2    |
|        | LVVDLTDIDPDVAYSSVPYEK                      |    |    |     | 0.89 | 4.6  | 2    |
|        | SLSNVIAHEISHSWTGNLVTNK                     |    |    |     | 1.03 | 4.3  | 3    |
|        | SSALQWLTPEQTSGK                            |    |    |     | 0.95 | 3.6  | 2    |
|        | TLTGTAALTVQSQEDNLR                         |    |    |     | 0.91 | 4.5  | 2    |
|        | WEDAIP LALK                                |    |    |     | 0.94 | 2.2  | 2    |
| P09972 | ALDOC Fructose_bisphosphate aldolase C     | 2  | 4  | 15  | 1.01 | 0.24 | 0.44 |
|        | GVVPLAGTDGETTTQGLDGLSER                    |    |    |     | 0.99 | 5.2  | 2    |
|        | YASICQQNGIVPIVEPEILPDGDHDLKR               |    |    |     | 1.09 | 3.1  | 3    |
| POC0L5 | CO4B Complement C4_B                       | 35 | 92 | 748 | 0.96 | 0.07 | 1.00 |
|        | ADGSYAAWLSR                                |    |    |     | 0.92 | 3.6  | 2    |
|        | AEFQDALEK                                  |    |    |     | 1.07 | 2.8  | 2    |
|        | CSVFGAPSK                                  |    |    |     | 0.83 | 2.4  | 2    |
|        | DFALLSLQVPLK                               |    |    |     | 0.68 | 3.8  | 2    |
|        | DHAVDLIQK                                  |    |    |     | 0.83 | 2.5  | 2    |
|        | EELVYELNPLDHR                              |    |    |     | 0.93 | 3.5  | 2    |
|        | FGLLDEDGKK                                 |    |    |     | 0.85 | 3.4  | 3    |
|        | GHLFLQTDQPIYNPGQR                          |    |    |     | 0.97 | 5.7  | 3    |
|        | GLCVATPVQLR                                |    |    |     | 0.93 | 2.5  | 2    |
|        | GLEEELQFSLGSK                              |    |    |     | 1.03 | 4.8  | 2    |
|        | GLQDEDGYR                                  |    |    |     | 0.88 | 2.9  | 2    |
|        | GSFEFPVGDVAVSK                             |    |    |     | 1.01 | 3.3  | 2    |
|        | ITQVLHFTK                                  |    |    |     | 1.12 | 2.9  | 2    |
|        | KYVLPNFEVK                                 |    |    |     | 0.97 | 3.0  | 2    |
|        | LELSVDGAK                                  |    |    |     | 1.06 | 2.2  | 2    |
|        | LLATLCSAEVCQCAEGK                          |    |    |     | 0.93 | 4.6  | 2    |
|        | LLLFSPSVVHLGVPLSVGVQLQDVPR                 |    |    |     | 0.85 | 5.1  | 3    |
|        | LNMGITDLQGLR                               |    |    |     | 0.90 | 3.6  | 2    |
|        | LQETSNWLLSQQQADGSFQDLSPVIHR                |    |    |     | 0.97 | 6.0  | 3    |
|        | LVNGQSHISLSK                               |    |    |     | 0.95 | 3.3  | 2    |
|        | MRPSTDTITVMVENSGLR                         |    |    |     | 0.93 | 4.5  | 3    |
|        | MRPSTDTITVMVENSGLR+Oxidation(0)            |    |    |     | 1.03 | 3.6  | 3    |
|        | SCGLHQLLR                                  |    |    |     | 1.09 | 3.2  | 2    |
|        | SHALQLNNR                                  |    |    |     | 0.96 | 2.8  | 2    |
|        | TEQWSTLPPETK                               |    |    |     | 1.11 | 3.7  | 2    |
|        | TLEIPGNSDPNMIPDGFNSYVR                     |    |    |     | 0.89 | 3.3  | 2    |
|        | TLEIPGNSDPNMIPDGFNSYVR+Oxidation(11)       |    |    |     | 0.96 | 3.4  | 2    |
|        | VDFTLSSER                                  |    |    |     | 0.95 | 3.3  | 2    |
|        | VDVQAGACEGK                                |    |    |     | 1.03 | 3.9  | 2    |
|        | VEYGFQVK                                   |    |    |     | 1.02 | 2.7  | 2    |
|        | VGDTLNLNLR                                 |    |    |     | 0.67 | 3.3  | 2    |
|        | VLSLAQEQVGG SPEK                           |    |    |     | 1.06 | 4.9  | 2    |
|        | VTASDPLDTLGSEGALSPGGVASLLR                 |    |    |     | 0.91 | 7.3  | 3    |
|        | YIYGKPVQGVAYVR                             |    |    |     | 1.02 | 2.9  | 2    |
|        | YVLPNFEVK                                  |    |    |     | 1.01 | 2.1  | 1    |
| POC0S5 | H2AZ Histone H2A.Z                         | 2  | 2  | 10  | 1.00 | 0.48 | 1.00 |

|        |                                           |    |    |     |      |      |      |
|--------|-------------------------------------------|----|----|-----|------|------|------|
|        | AGLQFPVGR                                 |    |    |     | 1.00 | 2.2  | 2    |
|        | HLQLAIR                                   |    |    |     | 0.99 | 2.2  | 2    |
| P0CG06 | LAC3 Ig lambda_3 chain C regions          | 2  | 9  | 57  | 0.94 | 0.28 | 1.00 |
|        | AGVETTPSK                                 |    |    |     | 0.93 | 3.4  | 2    |
|        | ATLVCLISDFYPGAVTVAWK                      |    |    |     | 0.96 | 3.4  | 2    |
| P0CG39 | POTEJ POTE ankyrin domain family member J | 5  | 13 | 101 | 0.96 | 0.21 | 1.00 |
|        | AGFAGDDAPR                                |    |    |     | 0.89 | 3.1  | 2    |
|        | IWHHTFYNELR                               |    |    |     | 0.90 | 3.7  | 3    |
|        | KDLIVMLRDTDVNK                            |    |    |     | 0.85 | 2.4  | 2    |
|        | QEYDESGPSIVHR                             |    |    |     | 1.01 | 3.4  | 3    |
|        | QMLKISSENSNPEQDLK                         |    |    |     | 1.05 | 2.4  | 2    |
| P0CG48 | UBC Polyubiquitin_C                       | 2  | 4  | 18  | 0.97 | 0.24 | 0.75 |
|        | ESTLHLVLR                                 |    |    |     | 1.08 | 2.2  | 2    |
|        | TITLEVEPSDTIENVK                          |    |    |     | 0.92 | 4.0  | 2    |
| P10253 | LYAG Lysosomal alpha_glucosidase          | 2  | 6  | 20  | 1.06 | 0.32 | 0.98 |
|        | AGYIIPLQGPGLTTTESR                        |    |    |     | 1.03 | 3.5  | 2    |
|        | VTSEGAGLQLQK                              |    |    |     | 1.09 | 2.7  | 2    |
| P10599 | THIO Thioredoxin                          | 3  | 5  | 25  | 0.92 | 0.22 | 0.71 |
|        | EKLEATINELV                               |    |    |     | 0.86 | 2.8  | 2    |
|        | LEATINELV                                 |    |    |     | 0.91 | 2.2  | 2    |
|        | TAFQEALDAAGDK                             |    |    |     | 0.97 | 3.7  | 2    |
| P10643 | CO7 Complement component C7               | 7  | 13 | 43  | 0.96 | 0.19 | 1.00 |
|        | ELSHLPSLYDYSAYR                           |    |    |     | 0.96 | 3.9  | 3    |
|        | LSGNVLSYTFQVK                             |    |    |     | 0.81 | 2.5  | 2    |
|        | NVVYTCNEGYSLIGNPVAR                       |    |    |     | 0.94 | 5.0  | 2    |
|        | SCVGETTESTQCEDEEHLR                       |    |    |     | 0.95 | 3.3  | 3    |
|        | SLVCNGSDCDESDSAEDRCEDSER                  |    |    |     | 1.56 | 4.3  | 3    |
|        | SSGWHFVVK                                 |    |    |     | 0.93 | 2.7  | 2    |
|        | YSAWAESVTNLPQVIK                          |    |    |     | 0.95 | 3.2  | 2    |
| P10909 | CLUS Clusterin                            | 6  | 15 | 146 | 0.99 | 0.15 | 1.00 |
|        | EILSVDCSTNNPSQAK                          |    |    |     | 0.98 | 4.1  | 2    |
|        | ELDESLQVAER                               |    |    |     | 0.95 | 3.3  | 2    |
|        | KTLLSNLEEAK                               |    |    |     | 1.10 | 2.4  | 2    |
|        | KTLLSNLEEAKK                              |    |    |     | 0.98 | 3.6  | 3    |
|        | LFSDPITVTPVEVSR                           |    |    |     | 0.93 | 5.3  | 2    |
|        | VTTVASHTSDSDVPSGVTEVVVK                   |    |    |     | 1.01 | 5.9  | 2    |
| P11021 | GRP78 78 kDa glucose_regulated protein    | 2  | 2  | 2   | 1.19 | 0.61 | 0.30 |
|        | ELEEIVQPIISK                              |    |    |     | 1.08 | 2.7  | 2    |
|        | NQLTSPNPENTVFDK                           |    |    |     | 1.33 | 3.6  | 2    |
| P11142 | HSP7C Heat shock cognate 71 kDa protein   | 12 | 25 | 140 | 0.97 | 0.13 | 1.00 |
|        | DAGTIAGLNVLR                              |    |    |     | 1.07 | 3.6  | 2    |
|        | IINEPTAAAIAYGLDK                          |    |    |     | 0.88 | 4.4  | 2    |
|        | LLQDFFNK                                  |    |    |     | 0.90 | 2.3  | 2    |
|        | NQTAEKEEFEHQK                             |    |    |     | 1.04 | 3.3  | 3    |
|        | NQVAMNPTNTVFDK                            |    |    |     | 0.98 | 3.6  | 2    |
|        | NQVAMNPTNTVFDK+Oxidation(4)               |    |    |     | 1.04 | 3.5  | 2    |
|        | SFYPEEVSSMVLTK                            |    |    |     | 0.90 | 3.0  | 2    |
|        | SINPDEAVAYGAAVQAAILSGDK                   |    |    |     | 0.93 | 2.7  | 2    |
|        | SQIHDIVLVGGSTR                            |    |    |     | 0.97 | 3.8  | 2    |
|        | STAGDTHLGGEDFDNR                          |    |    |     | 0.92 | 3.9  | 2    |
|        | TTPSYVAFTDTER                             |    |    |     | 0.99 | 3.0  | 2    |
|        | VEIANDQGNR                                |    |    |     | 0.92 | 3.2  | 2    |
| P11684 | UTER Uteroglobin                          | 3  | 15 | 211 | 1.00 | 0.26 | 0.97 |
|        | EAGAQLK                                   |    |    |     | 0.78 | 1.8  | 1    |
|        | KLVDLTPQKPR                               |    |    |     | 1.14 | 4.1  | 3    |
|        | LVDLTPQKPR                                |    |    |     | 0.91 | 3.1  | 2    |
| P12110 | CO6A2 Collagen alpha-2(VI) chain          | 2  | 6  | 27  | 1.00 | 0.29 | 1.00 |
|        | EEGIRLFAVAPNQLK                           |    |    |     | 1.01 | 2.6  | 2    |
|        | RGTFTDCALANMTEQIR                         |    |    |     | 0.99 | 2.3  | 2    |
| P12277 | KCRB Creatine kinase B_type               | 2  | 3  | 8   | 0.82 | 0.50 | 0.33 |
|        | GTGGVDTAAVGGVFDVSNADR                     |    |    |     | 0.87 | 3.2  | 2    |
|        | LAVEALSSLDGDLAGR                          |    |    |     | 0.79 | 3.1  | 2    |
| P12429 | ANXA3 Annexin A3                          | 4  | 6  | 15  | 0.95 | 0.28 | 0.99 |
|        | DYPDFSPSVDAEAIQK                          |    |    |     | 0.91 | 2.6  | 2    |
|        | GIGTDEFTLNR                               |    |    |     | 1.03 | 2.5  | 2    |
|        | MLISILTER+Oxidation(0)                    |    |    |     | 0.92 | 2.4  | 2    |
|        | SLGDDISSETSGDFR                           |    |    |     | 0.89 | 3.4  | 2    |

|        |       |                                       |    |    |      |      |      |      |
|--------|-------|---------------------------------------|----|----|------|------|------|------|
| P12830 | CADH1 | Cadherin_1                            | 2  | 2  | 3    | 0.95 | 0.33 | 0.65 |
|        |       |                                       |    |    | 0.89 | 2.3  | 2    |      |
|        |       |                                       |    |    | 1.01 | 3.5  | 2    |      |
| P13489 | RINI  | Ribonuclease inhibitor                | 4  | 6  | 47   | 1.08 | 0.26 | 0.92 |
|        |       |                                       |    |    | 1.12 | 2.9  | 2    |      |
|        |       |                                       |    |    | 1.12 | 3.2  | 2    |      |
|        |       |                                       |    |    | 1.08 | 3.3  | 2    |      |
|        |       |                                       |    |    | 1.00 | 3.2  | 2    |      |
| P13645 | K1C10 | Keratin_type I cytoskeletal 10        | 10 | 16 | 69   | 0.69 | 0.24 | 0.00 |
|        |       |                                       |    |    | 0.67 | 3.5  | 2    |      |
|        |       |                                       |    |    | 0.72 | 5.2  | 2    |      |
|        |       |                                       |    |    | 0.58 | 4.1  | 2    |      |
|        |       |                                       |    |    | 0.70 | 2.6  | 2    |      |
|        |       |                                       |    |    | 0.75 | 2.7  | 2    |      |
|        |       |                                       |    |    | 0.69 | 2.2  | 2    |      |
|        |       |                                       |    |    | 0.64 | 2.7  | 2    |      |
|        |       |                                       |    |    | 0.73 | 2.4  | 2    |      |
|        |       |                                       |    |    | 0.71 | 3.4  | 2    |      |
|        |       |                                       |    |    | 0.67 | 2.5  | 2    |      |
| P13671 | CO6   | Complement component C6               | 5  | 6  | 16   | 0.98 | 0.31 | 0.99 |
|        |       |                                       |    |    | 0.83 | 3.3  | 3    |      |
|        |       |                                       |    |    | 1.03 | 3.1  | 2    |      |
|        |       |                                       |    |    | 1.02 | 2.5  | 2    |      |
|        |       |                                       |    |    | 0.60 | 2.3  | 2    |      |
|        |       |                                       |    |    | 1.02 | 3.2  | 3    |      |
| P13796 | PLSL  | Plastin_2                             | 11 | 23 | 142  | 0.93 | 0.15 | 1.00 |
|        |       |                                       |    |    | 0.93 | 4.2  | 3    |      |
|        |       |                                       |    |    | 0.98 | 3.8  | 3    |      |
|        |       |                                       |    |    | 0.95 | 4.2  | 2    |      |
|        |       |                                       |    |    | 0.82 | 3.2  | 2    |      |
|        |       |                                       |    |    | 0.98 | 3.8  | 3    |      |
|        |       |                                       |    |    | 0.93 | 2.4  | 2    |      |
|        |       |                                       |    |    | 0.88 | 2.3  | 2    |      |
|        |       |                                       |    |    | 0.96 | 2.7  | 2    |      |
|        |       |                                       |    |    | 0.91 | 4.7  | 2    |      |
|        |       |                                       |    |    | 0.93 | 3.2  | 2    |      |
|        |       |                                       |    |    | 0.89 | 4.1  | 2    |      |
| P13797 | PLST  | Plastin_3                             | 5  | 8  | 49   | 0.95 | 0.22 | 0.84 |
|        |       |                                       |    |    | 1.07 | 4.2  | 2    |      |
|        |       |                                       |    |    | 0.91 | 2.6  | 2    |      |
|        |       |                                       |    |    | 0.83 | 2.2  | 2    |      |
|        |       |                                       |    |    | 1.02 | 3.2  | 2    |      |
|        |       |                                       |    |    | 0.89 | 2.2  | 2    |      |
| P13987 | CD59  | CD59 glycoprotein                     | 2  | 4  | 10   | 0.95 | 0.69 | 0.92 |
|        |       |                                       |    |    | 1.16 | 3.4  | 2    |      |
|        |       |                                       |    |    | 0.75 | 3.9  | 2    |      |
| P14550 | AK1A1 | Alcohol dehydrogenase [NADP_]         | 3  | 7  | 28   | 0.95 | 0.29 | 1.00 |
|        |       |                                       |    |    | 0.99 | 3.9  | 2    |      |
|        |       |                                       |    |    | 0.89 | 3.4  | 2    |      |
|        |       |                                       |    |    | 0.90 | 3.6  | 3    |      |
| P14618 | KPYM  | Pyruvate kinase isozymes M1/M2        | 11 | 19 | 79   | 0.98 | 0.16 | 1.00 |
|        |       |                                       |    |    | 0.87 | 4.6  | 2    |      |
|        |       |                                       |    |    | 0.96 | 2.3  | 2    |      |
|        |       |                                       |    |    | 0.95 | 3.4  | 2    |      |
|        |       |                                       |    |    | 0.89 | 2.5  | 2    |      |
|        |       |                                       |    |    | 1.02 | 4.5  | 2    |      |
|        |       |                                       |    |    | 1.07 | 3.3  | 2    |      |
|        |       |                                       |    |    | 0.97 | 2.9  | 2    |      |
|        |       |                                       |    |    | 1.01 | 2.5  | 2    |      |
|        |       |                                       |    |    | 0.95 | 4.0  | 3    |      |
|        |       |                                       |    |    | 1.07 | 2.9  | 2    |      |
|        |       |                                       |    |    | 0.97 | 4.1  | 2    |      |
| P15090 | FABP4 | Fatty acid_binding protein_ adipocyte | 3  | 4  | 50   | 1.01 | 0.27 | 1.00 |
|        |       |                                       |    |    | 0.94 | 2.1  | 2    |      |
|        |       |                                       |    |    | 0.98 | 2.4  | 2    |      |
|        |       |                                       |    |    | 1.05 | 3.6  | 2    |      |
| P15311 | EZRI  | Ezrin                                 | 3  | 4  | 42   | 0.93 | 0.32 | 1.00 |

|        |                                                    |    |    |     |      |      |      |
|--------|----------------------------------------------------|----|----|-----|------|------|------|
|        | QLLTLSELSQAR                                       |    |    |     | 0.92 | 3.6  | 2    |
|        | RKEDEVEEWQHR                                       |    |    |     | 0.96 | 4.3  | 3    |
|        | SQEQLAAELAEYTA                                     |    |    |     | 0.89 | 5.0  | 2    |
| P15941 | MUC1 Mucin_1                                       | 3  | 6  | 36  | 0.92 | 0.25 | 0.99 |
|        | EGTINVHDTVETQFNQYK                                 |    |    |     | 0.93 | 3.6  | 2    |
|        | NYGQLDIFPAR                                        |    |    |     | 0.93 | 3.2  | 2    |
|        | VSAGNGGSSLSYTNPAVAATSANL                           |    |    |     | 0.92 | 3.8  | 2    |
| P16070 | CD44 CD44 antigen                                  | 3  | 11 | 68  | 0.96 | 0.17 | 1.00 |
|        | ALSIGFETCR                                         |    |    |     | 0.98 | 3.4  | 2    |
|        | TNPEDIYPSNPTDDDVSSGSSSER                           |    |    |     | 0.95 | 4.9  | 2    |
|        | YGFIEGHVVIPR                                       |    |    |     | 0.94 | 3.9  | 3    |
| P17931 | LEG3 Galectin_3                                    | 2  | 3  | 11  | 1.02 | 0.33 | 0.99 |
|        | GNDVAFHFNPR                                        |    |    |     | 1.02 | 2.4  | 2    |
|        | IQVLVEPDHFK                                        |    |    |     | 1.02 | 3.0  | 3    |
| P18136 | KV313 Ig kappa chain V_III region HIC              | 2  | 19 | 184 | 0.92 | 0.13 | 0.98 |
|        | FSGSGSGTDFLTISR                                    |    |    |     | 0.93 | 4.8  | 2    |
|        | LLIYGASSR                                          |    |    |     | 0.88 | 3.0  | 2    |
| P18669 | PGAM1 Phosphoglycerate mutase 1                    | 2  | 5  | 22  | 0.94 | 0.25 | 0.41 |
|        | HGESAWNLENR                                        |    |    |     | 1.07 | 3.5  | 2    |
|        | YADLTEDQLPSCESLK                                   |    |    |     | 0.89 | 4.1  | 2    |
| P19652 | A1AG2 Alpha_1_acid glycoprotein 2                  | 3  | 7  | 88  | 0.99 | 0.25 | 0.99 |
|        | EHVAHLLFLR                                         |    |    |     | 1.04 | 3.1  | 3    |
|        | TEDTIFLR                                           |    |    |     | 0.97 | 3.1  | 2    |
|        | WFYIASAFR                                          |    |    |     | 0.97 | 3.6  | 2    |
| P19823 | ITIH2 Inter_alpha_trypsin inhibitor heavy chain H2 | 6  | 10 | 32  | 1.01 | 0.22 | 1.00 |
|        | AEDHFSVIDFNQIR                                     |    |    |     | 1.05 | 2.7  | 2    |
|        | FLHVPDTFEGHFDGVPVISK                               |    |    |     | 0.96 | 4.2  | 4    |
|        | FYNQVSTPLLR                                        |    |    |     | 0.98 | 2.6  | 2    |
|        | IQPSGGTNINEALLR                                    |    |    |     | 1.07 | 2.8  | 2    |
|        | NVQFNYPHTSVTDVTDVQNNFHNHYFGGSEIVVAGK               |    |    |     | 0.99 | 4.5  | 4    |
|        | VVNNSPQPQNVVFDVQIPK                                |    |    |     | 0.94 | 3.8  | 3    |
| P19827 | ITIH1 Inter_alpha_trypsin inhibitor heavy chain H1 | 8  | 16 | 79  | 0.94 | 0.14 | 1.00 |
|        | AAISGENAGLVR                                       |    |    |     | 0.99 | 2.6  | 2    |
|        | EVAFDLEIPK                                         |    |    |     | 0.92 | 2.6  | 2    |
|        | FAHYVVTQVVTANEAR                                   |    |    |     | 0.84 | 5.5  | 2    |
|        | GFSLDEATNLNGLLR                                    |    |    |     | 0.95 | 4.5  | 2    |
|        | GSLVQASEANLQAAQDFVR                                |    |    |     | 0.93 | 4.6  | 2    |
|        | LDAQASFLPK                                         |    |    |     | 1.00 | 2.8  | 2    |
|        | NHMQEIVIK+Oxidation(2)                             |    |    |     | 0.94 | 2.1  | 2    |
|        | QYYEGSEIVVAGR                                      |    |    |     | 0.90 | 3.2  | 2    |
| P19971 | TYPH Thymidine phosphorylase                       | 2  | 2  | 2   | 0.93 | 0.57 | 0.72 |
|        | FGGAAVFPNQEQR                                      |    |    |     | 1.02 | 2.2  | 2    |
|        | VSLVLAPALAACGCK                                    |    |    |     | 0.82 | 2.3  | 2    |
| P20142 | PEPC Gastricin                                     | 2  | 3  | 32  | 0.93 | 0.33 | 1.00 |
|        | GLLGEFLR                                           |    |    |     | 0.94 | 2.9  | 2    |
|        | SYYSVYDLGNRR                                       |    |    |     | 0.92 | 3.8  | 2    |
| P20742 | PZP Pregnancy zone protein                         | 3  | 5  | 47  | 0.97 | 0.30 | 1.00 |
|        | ATVLNLYPK                                          |    |    |     | 0.90 | 2.9  | 2    |
|        | MVSGFIPLKPTVK+Oxidation(0)                         |    |    |     | 1.02 | 3.3  | 2    |
|        | SSGSLLNNAIK                                        |    |    |     | 0.97 | 2.8  | 2    |
| P21333 | FLNA Filamin_A                                     | 13 | 23 | 99  | 0.96 | 0.12 | 0.94 |
|        | AEAGVPAEFSIWTR                                     |    |    |     | 0.95 | 3.0  | 2    |
|        | ALGALVDSCAPGLCPDWDSWDASKPVTNAR                     |    |    |     | 0.67 | 4.2  | 3    |
|        | DAGEGGLSLAIEGPSK                                   |    |    |     | 1.13 | 3.8  | 2    |
|        | DGSCGVAYVQEPGDYEVSVK                               |    |    |     | 0.90 | 4.0  | 2    |
|        | DKGEYTLVVK                                         |    |    |     | 0.85 | 2.2  | 2    |
|        | EAGAGGLAIAVEGPSK                                   |    |    |     | 0.90 | 3.6  | 2    |
|        | FNEEHIPDSPFVVPVASPSGDAR                            |    |    |     | 0.99 | 3.3  | 3    |
|        | GAGTGGLGLAVEGPSEAK                                 |    |    |     | 1.03 | 3.5  | 2    |
|        | GLVEPVDVVDNADGTQTVNYVPSR                           |    |    |     | 0.91 | 5.9  | 2    |
|        | IANLQTDLSGLR                                       |    |    |     | 1.21 | 2.3  | 2    |
|        | SPFSVAVSPSLDLSK                                    |    |    |     | 0.89 | 2.2  | 2    |
|        | VNQPASFAVSLNGAK                                    |    |    |     | 0.93 | 3.1  | 2    |
|        | YTPVQQGPVGNVVTYGGDPIPK                             |    |    |     | 0.89 | 4.6  | 2    |
| P21980 | TGM2 Protein_glutamine gamma_glutamyltransferase 2 | 4  | 5  | 26  | 0.93 | 0.26 | 0.99 |
|        | DLYLENPEIK                                         |    |    |     | 0.95 | 2.6  | 2    |
|        | NYEASVDSLTFVVTGPAPSQEAGTK                          |    |    |     | 0.88 | 2.8  | 2    |

|        |                                                         |    |    |     |      |      |      |
|--------|---------------------------------------------------------|----|----|-----|------|------|------|
|        |                                                         |    |    |     | 0.89 | 3.1  | 2    |
|        |                                                         |    |    |     | 0.95 | 2.3  | 2    |
| P22314 | UBA1 Ubiquitin_like modifier_activating enzyme 1        | 3  | 5  | 11  | 1.02 | 0.29 | 1.00 |
|        | AAVATFLQSVQVPEFTPK                                      |    |    |     | 0.99 | 3.0  | 2    |
|        | ALPAVQQNNLDEDLIR                                        |    |    |     | 1.05 | 3.9  | 2    |
|        | SLVASLAEPDFVVTDFAK                                      |    |    |     | 1.05 | 2.6  | 2    |
| P22626 | ROA2 Heterogeneous nuclear ribonucleoproteins A2/B1     | 2  | 3  | 19  | 0.92 | 0.35 | 0.93 |
|        | IDTIEIITDR                                              |    |    |     | 0.91 | 3.0  | 2    |
|        | LFIGGLSFETTEESLR                                        |    |    |     | 0.95 | 2.5  | 2    |
| P22897 | MRC1 Macrophage mannose receptor 1                      | 10 | 14 | 55  | 0.96 | 0.17 | 0.99 |
|        | ACIGFGGNLVSQNEK                                         |    |    |     | 0.92 | 4.0  | 2    |
|        | FEGSESLWNKDPLTSVSYQINSK                                 |    |    |     | 0.97 | 3.2  | 3    |
|        | FQWHEAETYCK                                             |    |    |     | 1.27 | 2.7  | 2    |
|        | IYGTTDNLCSR                                             |    |    |     | 0.93 | 2.3  | 2    |
|        | NWGQASLECLR                                             |    |    |     | 1.14 | 2.4  | 2    |
|        | SSLSYEDADCVVIIIGGASNEAGK                                |    |    |     | 0.91 | 4.8  | 2    |
|        | WENLECVQK                                               |    |    |     | 0.74 | 2.5  | 2    |
|        | YFWTGLSDIQTK                                            |    |    |     | 0.97 | 3.6  | 2    |
|        | YLNWLPGSPSAEPGK                                         |    |    |     | 0.95 | 2.8  | 2    |
|        | YTNWAADEPK                                              |    |    |     | 0.80 | 2.3  | 2    |
| P23141 | EST1 Liver carboxylesterase 1                           | 4  | 7  | 38  | 1.03 | 0.27 | 0.97 |
|        | AGQLLSELFTRN                                            |    |    |     | 0.66 | 3.0  | 2    |
|        | AISESGVALTSVLVK                                         |    |    |     | 0.99 | 4.0  | 2    |
|        | EGYLQIGANTQAAQK                                         |    |    |     | 1.05 | 3.7  | 2    |
|        | MVMKFWANFARNGNPNGEGLPHWPEYNQK+Oxidation(0),Oxidation(2) |    |    |     | 1.22 | 3.1  | 3    |
| P23381 | SYWC Tryptophanyl_tRNA synthetase_cytoplasmic           | 3  | 6  | 26  | 0.96 | 0.37 | 1.00 |
|        | DLTLDQAYSAYAVENAK                                       |    |    |     | 0.92 | 4.3  | 2    |
|        | GIFGFTDSDCIGK                                           |    |    |     | 0.97 | 3.5  | 2    |
|        | ISFPAIQAAPSFNSFPQIFR                                    |    |    |     | 1.03 | 2.4  | 2    |
| P23528 | COF1 Cofilin_1                                          | 5  | 14 | 177 | 0.93 | 0.14 | 0.91 |
|        | EILVGDVGQTVDDPYATFVK                                    |    |    |     | 0.93 | 5.4  | 2    |
|        | HELQANCYEEVK                                            |    |    |     | 0.95 | 3.9  | 2    |
|        | HELQANCYEEVKDR                                          |    |    |     | 0.99 | 5.7  | 3    |
|        | LGGSAVISLEGKPL                                          |    |    |     | 0.65 | 3.8  | 2    |
|        | NIILEEGKEILVGDVGQTVDDPYATFVK                            |    |    |     | 0.90 | 6.6  | 3    |
| P25311 | ZA2G Zinc_alpha_2_glycoprotein                          | 2  | 2  | 21  | 1.01 | 0.42 | 1.00 |
|        | AYLEEECPATLR                                            |    |    |     | 1.07 | 3.3  | 2    |
|        | EIPAWVPFDPAAQITK                                        |    |    |     | 0.97 | 2.5  | 2    |
| P26038 | MOES Moesin                                             | 4  | 5  | 17  | 0.94 | 0.26 | 0.97 |
|        | ALTSELANAR                                              |    |    |     | 0.92 | 2.2  | 2    |
|        | AQMVEDLEK+Oxidation(2)                                  |    |    |     | 1.08 | 2.3  | 2    |
|        | ESEAVEWQQK                                              |    |    |     | 0.90 | 3.0  | 2    |
|        | TQEQLALEMAELTAR                                         |    |    |     | 0.96 | 4.8  | 2    |
| P29401 | TKT Transketolase                                       | 6  | 14 | 33  | 1.01 | 0.18 | 0.93 |
|        | AVELAANTK                                               |    |    |     | 0.89 | 2.2  | 2    |
|        | ILATPPQEDAPSVDIANIR                                     |    |    |     | 0.99 | 4.2  | 3    |
|        | LDNLVAILDINR                                            |    |    |     | 1.20 | 2.9  | 2    |
|        | SKDDQVTVIGAGVTLHEALAAAELLK                              |    |    |     | 0.95 | 5.0  | 4    |
|        | SVPTSTVFYPSDGVATEK                                      |    |    |     | 1.12 | 2.9  | 2    |
|        | TSRPENAIINYNNNDFQVGQAK                                  |    |    |     | 0.94 | 3.6  | 3    |
| P29508 | SPB3 Serpin B3                                          | 5  | 9  | 48  | 1.06 | 0.24 | 0.03 |
|        | FKVEESYDLK                                              |    |    |     | 0.91 | 3.5  | 3    |
|        | FYQTSVESVDFANAPEESR                                     |    |    |     | 0.98 | 5.1  | 2    |
|        | GLVLSGVLHK                                              |    |    |     | 0.90 | 2.7  | 2    |
|        | KVLHFDQVTENTTGK                                         |    |    |     | 1.27 | 3.1  | 3    |
|        | VLHFDQVTENTTGK                                          |    |    |     | 1.26 | 3.8  | 2    |
| P30041 | PRDX6 Peroxiredoxin_6                                   | 2  | 2  | 10  | 0.98 | 0.51 | 0.32 |
|        | DFTPVCTTELGR                                            |    |    |     | 1.11 | 2.5  | 2    |
|        | DINAYNCEEPTK                                            |    |    |     | 0.71 | 3.1  | 2    |
| P30044 | PRDX5 Peroxiredoxin_5_mitochondrial                     | 8  | 22 | 208 | 0.94 | 0.12 | 1.00 |
|        | ALNVEPDGTGLTCSLAPNIISQL                                 |    |    |     | 0.89 | 4.5  | 2    |
|        | ETDLLLDDSLVSIFGNR                                       |    |    |     | 0.95 | 4.1  | 2    |
|        | FSMVVDGIVK                                              |    |    |     | 1.00 | 3.3  | 2    |
|        | GVLFGVPGAFTPGCSK                                        |    |    |     | 0.91 | 4.2  | 2    |
|        | LLADPTGAFGK                                             |    |    |     | 1.04 | 2.4  | 2    |
|        | THLPGFVEQAEALK                                          |    |    |     | 0.97 | 3.9  | 3    |
|        | VGDAIPAVEVFEGEPGNK                                      |    |    |     | 0.93 | 5.0  | 2    |



|        |                                                       |    |    |      |      |      |      |
|--------|-------------------------------------------------------|----|----|------|------|------|------|
|        | VNLAELFK                                              |    |    | 0.96 | 2.8  | 2    |      |
| P30085 | KCY UMP_CMP kinase                                    | 2  | 2  | 14   | 1.01 | 0.64 | 0.99 |
|        | EMDQTMANAQK+Oxidation(1),Oxidation(5)                 |    |    | 1.26 | 3.2  | 2    |      |
|        | GKSSGRSDDNR                                           |    |    | 0.92 | 2.2  | 2    |      |
| P30086 | PEBP1 Phosphatidylethanolamine_binding protein 1      | 4  | 9  | 57   | 0.97 | 0.16 | 1.00 |
|        | GNDISSGTVLSDYVGSPPK                                   |    |    | 1.01 | 5.3  | 2    |      |
|        | LYTLVLTDPDAPSR                                        |    |    | 0.94 | 3.5  | 2    |      |
|        | NRPTSISWDGLDSGK                                       |    |    | 0.92 | 3.7  | 2    |      |
|        | WSGPLSLQEVDQPHPLHVTYAGAAVDELGK                        |    |    | 0.98 | 5.0  | 4    |      |
| P30530 | UFO Tyrosine_protein kinase receptor UFO              | 2  | 2  | 2    | 0.94 | 0.62 | 0.83 |
|        | NCMLNENMSVCVADFGLSKK+Oxidation(2)                     |    |    | 0.86 | 2.7  | 2    |      |
|        | TATITVLPQQPR                                          |    |    | 1.02 | 2.1  | 2    |      |
| P30740 | ILEU Leukocyte elastase inhibitor                     | 4  | 6  | 33   | 0.96 | 0.33 | 1.00 |
|        | FKLEESYTLNSDLAR                                       |    |    | 0.94 | 3.0  | 3    |      |
|        | KIEEQLTLEK                                            |    |    | 1.03 | 2.9  | 2    |      |
|        | LGVQDLFNSSK                                           |    |    | 0.88 | 3.2  | 2    |      |
|        | TFHFNTVEEVHSR                                         |    |    | 0.95 | 3.4  | 3    |      |
| P30838 | AL3A1 Aldehyde dehydrogenase_dimeric NADP_prefering   | 5  | 9  | 69   | 1.01 | 0.21 | 1.00 |
|        | FDHILYTGSTGVGK                                        |    |    | 1.04 | 3.4  | 2    |      |
|        | IQLEALQR                                              |    |    | 1.01 | 2.6  | 2    |      |
|        | LIQEQQELVGALAADLHK                                    |    |    | 0.99 | 5.3  | 3    |      |
|        | NCDLDVACR                                             |    |    | 1.03 | 2.5  | 2    |      |
|        | SLEEAIQFINQR                                          |    |    | 0.97 | 3.2  | 2    |      |
| P31946 | 1433B 14_3_3 protein beta/alpha                       | 2  | 3  | 8    | 0.99 | 0.38 | 0.45 |
|        | AVTEQGHLSNEER                                         |    |    | 1.14 | 4.5  | 2    |      |
|        | YLSEVASGDNK                                           |    |    | 0.86 | 2.7  | 2    |      |
| P31949 | S10AB Protein S100_A11                                | 2  | 2  | 4    | 0.86 | 0.45 | 0.48 |
|        | DGYNYTLTK                                             |    |    | 0.86 | 2.4  | 2    |      |
|        | NQKDPGVLDLDRMMK+Oxidation(11)                         |    |    | 0.85 | 2.2  | 2    |      |
| P32119 | PRDX2 Peroxiredoxin_2                                 | 3  | 7  | 39   | 0.97 | 0.20 | 0.67 |
|        | ATAVVDGAFK                                            |    |    | 1.01 | 2.4  | 2    |      |
|        | EGGLGPLNIPLLDVTR                                      |    |    | 0.89 | 3.9  | 2    |      |
|        | QITVNDLPVGR                                           |    |    | 1.06 | 2.9  | 2    |      |
| P35241 | RADI Radixin                                          | 2  | 2  | 19   | 0.87 | 0.46 | 0.85 |
|        | IGFPWSEIR                                             |    |    | 0.90 | 2.3  | 2    |      |
|        | RKPDTIEVQQMK+Oxidation(10)                            |    |    | 0.81 | 3.8  | 3    |      |
| P35247 | SFTPD Pulmonary surfactant_associated protein D       | 8  | 45 | 490  | 1.02 | 0.10 | 0.89 |
|        | GESGLPDVASLR                                          |    |    | 1.09 | 3.2  | 2    |      |
|        | KVELFPNGQSVGEK                                        |    |    | 1.18 | 4.5  | 2    |      |
|        | NEAFLSMTDSK                                           |    |    | 1.03 | 3.6  | 2    |      |
|        | NEAFLSMTDSK+Oxidation(7)                              |    |    | 0.97 | 4.2  | 2    |      |
|        | QQVEALQGQVQHLQAQAFSQQYK                               |    |    | 1.00 | 4.3  | 3    |      |
|        | SAAENAALQQLVVAK                                       |    |    | 0.99 | 5.2  | 2    |      |
|        | TAGFVKPFTEAQLLCTQAGGQLASPR                            |    |    | 0.93 | 5.0  | 2    |      |
|        | VELFPNGQSVGEK                                         |    |    | 1.10 | 2.5  | 2    |      |
| P35527 | K1C9 Keratin_type I cytoskeletal 9                    | 9  | 19 | 49   | 0.65 | 0.30 | 0.19 |
|        | DIENQYETQITQIEHEVSSSGQEVQSSAK                         |    |    | 0.60 | 3.9  | 3    |      |
|        | EIETYHNLEGGQEDFESSGAGK                                |    |    | 0.61 | 4.3  | 2    |      |
|        | GGGGSFGYSYGGGSGGGFSASSLGGGFGGGSR                      |    |    | 0.66 | 5.0  | 3    |      |
|        | GGSGGSHGGGSGFGGESGGSYGGGEEASGSGGGYGGGSGK              |    |    | 0.50 | 7.5  | 3    |      |
|        | GGSGGSGGGGSGGGYGGGSGSR                                |    |    | 0.70 | 4.6  | 2    |      |
|        | GGSGGSGGGGSGGGGSGGGYGGGSGGGHSGGSGGGHSGGSGGNYGGGSGSGGG |    |    | 0.51 | 4.2  | 4    |      |
|        | HGVQELEIELQSLSK                                       |    |    | 0.72 | 4.7  | 2    |      |
|        | SGGGGGGLGSGGSIR                                       |    |    | 0.88 | 2.4  | 2    |      |
|        | VQALEEANNDLENK                                        |    |    | 0.66 | 4.4  | 2    |      |
| P35579 | MYH9 Myosin_9                                         | 11 | 18 | 51   | 1.02 | 0.18 | 1.00 |
|        | DMFQETMEAMR+Oxidation(1)                              |    |    | 1.21 | 2.1  | 2    |      |
|        | IAEFTTNLTETEEEK                                       |    |    | 0.91 | 4.0  | 2    |      |
|        | IAQLEEQLDNETK                                         |    |    | 1.03 | 3.1  | 2    |      |
|        | LQVELDNVTGLLSQSDSK                                    |    |    | 0.97 | 4.3  | 2    |      |
|        | NFINNPLAQADWAAK                                       |    |    | 1.05 | 4.2  | 2    |      |
|        | QLLQANPILEAFGNAK                                      |    |    | 1.06 | 3.0  | 2    |      |
|        | RGDLPFVVPK                                            |    |    | 1.06 | 2.1  | 2    |      |
|        | THEAQIQEMR+Oxidation(8)                               |    |    | 0.87 | 2.8  | 2    |      |
|        | TQLEELEDELQATEDAK                                     |    |    | 0.86 | 4.0  | 2    |      |
|        | VISGVLQLGNIVFK                                        |    |    | 1.07 | 3.9  | 2    |      |

|        |                                               |   |    |      |      |      |      |
|--------|-----------------------------------------------|---|----|------|------|------|------|
|        | VKLQEMEGTVK+Oxidation(5)                      |   |    | 1.02 | 2.4  | 2    |      |
| P35749 | MYH11 Myosin_11                               | 2 | 3  | 19   | 1.06 | 0.36 | 0.97 |
|        | ALEEALAEAK                                    |   |    | 1.09 | 2.5  | 2    |      |
|        | ASRDEIFATAKENEK                               |   |    | 1.01 | 2.2  | 2    |      |
| P35754 | GLRX1 Glutaredoxin_1                          | 2 | 2  | 8    | 1.01 | 0.52 | 0.98 |
|        | AQEILSQLPIK                                   |   |    | 1.07 | 3.1  | 2    |      |
|        | DCIGGCSDLVSLQQSGELLTR                         |   |    | 0.91 | 4.7  | 2    |      |
| P35908 | K22E Keratin_type II cytoskeletal 2 epidermal | 5 | 5  | 16   | 0.78 | 0.63 | 0.92 |
|        | GFSSGSAVVSGGSR                                |   |    | 0.84 | 2.9  | 2    |      |
|        | GGSGGGGSISGGGYGSGGGSGGR                       |   |    | 0.72 | 4.1  | 2    |      |
|        | VDLLNQEIEFLK                                  |   |    | 0.75 | 3.2  | 2    |      |
|        | YEELQVTVGR                                    |   |    | 0.89 | 2.8  | 2    |      |
|        | YLDGLTAER                                     |   |    | 0.69 | 2.5  | 2    |      |
| P36222 | CH3L1 Chitinase_3_like protein 1              | 2 | 5  | 15   | 0.91 | 0.30 | 0.45 |
|        | GNQWVGYYDDQESVK                               |   |    | 0.84 | 2.7  | 2    |      |
|        | SFTLASSETGVGAPISGPGIPGR                       |   |    | 0.94 | 3.7  | 2    |      |
| P36871 | PGM1 Phosphoglucomutase_1                     | 3 | 3  | 20   | 0.97 | 0.38 | 0.56 |
|        | ADNFEYSDPVDGSISR                              |   |    | 1.04 | 2.7  | 2    |      |
|        | FNISNGGPAPEAITDK                              |   |    | 1.12 | 2.8  | 2    |      |
|        | LSGTGSAGATIR                                  |   |    | 0.88 | 2.9  | 2    |      |
| P36955 | PEDF Pigment epithelium_derived factor        | 9 | 11 | 72   | 0.98 | 0.21 | 1.00 |
|        | DTDTGALLFIGK                                  |   |    | 1.01 | 2.6  | 2    |      |
|        | ELLDTVTAPQK                                   |   |    | 0.99 | 2.5  | 2    |      |
|        | KTSLEDFYLDEER                                 |   |    | 1.31 | 2.8  | 2    |      |
|        | LDLQEINNWWQAQMK                               |   |    | 0.79 | 3.9  | 2    |      |
|        | LDLQEINNWWQAQMKGLAR+Oxidation(13)             |   |    | 1.01 | 3.1  | 3    |      |
|        | LQSLFDSPDFSK                                  |   |    | 0.92 | 3.3  | 2    |      |
|        | LSYEGEVTK                                     |   |    | 0.94 | 2.2  | 2    |      |
|        | TVQAVLTVPK                                    |   |    | 1.05 | 2.8  | 2    |      |
|        | YGLSDLSCK                                     |   |    | 0.97 | 2.7  | 2    |      |
| P36980 | FHR2 Complement factor H_related protein 2    | 2 | 3  | 9    | 0.97 | 0.62 | 0.96 |
|        | INHGILYDEEK                                   |   |    | 0.89 | 3.5  | 2    |      |
|        | LQNNENNISCVER                                 |   |    | 1.08 | 2.7  | 2    |      |
| P37802 | TAGL2 Transgelin_2                            | 4 | 7  | 56   | 0.91 | 0.23 | 0.61 |
|        | DDGLFSGDPNWFPK                                |   |    | 0.89 | 3.9  | 2    |      |
|        | DGTVLCELINALYPEGQAPVKK                        |   |    | 0.83 | 3.4  | 3    |      |
|        | NFSDNQLQEGK                                   |   |    | 0.99 | 2.7  | 2    |      |
|        | TLMNLGGLAVAR                                  |   |    | 0.91 | 3.6  | 2    |      |
| P40121 | CAPG Macrophage_capping protein               | 5 | 6  | 39   | 0.90 | 0.26 | 0.57 |
|        | ANAQAAALYK                                    |   |    | 0.80 | 3.1  | 2    |      |
|        | AQVEIVTDGEEPAEMIQVLGPKPALK                    |   |    | 0.93 | 3.5  | 3    |      |
|        | EGNPEEDLTADK                                  |   |    | 0.92 | 2.6  | 2    |      |
|        | VSDATGQMNLTK+Oxidation(7)                     |   |    | 1.03 | 2.5  | 2    |      |
|        | YQEGGVESAFHK                                  |   |    | 0.91 | 2.7  | 2    |      |
| P40925 | MDHC Malate dehydrogenase_cytoplasmic         | 5 | 9  | 49   | 1.00 | 0.19 | 0.97 |
|        | DVIATDKEDVAFK                                 |   |    | 1.01 | 3.5  | 2    |      |
|        | FVEGLPINDFSR                                  |   |    | 1.01 | 2.2  | 2    |      |
|        | GEFVTTVQQR                                    |   |    | 0.92 | 3.2  | 2    |      |
|        | NVIIWGNHSSTQYPDVNHAK                          |   |    | 0.95 | 4.2  | 3    |      |
|        | VIVVGNPANTNCLTASK                             |   |    | 1.13 | 4.6  | 2    |      |
| P40926 | MDHM Malate dehydrogenase_mitochondrial       | 2 | 3  | 6    | 0.99 | 0.50 | 0.86 |
|        | SQETECTYFSTPLLLGK                             |   |    | 0.90 | 2.8  | 2    |      |
|        | VAVLGASGGIGQPLSLLK                            |   |    | 1.18 | 2.7  | 2    |      |
| P41162 | ETV3 ETS translocation variant 3              | 2 | 2  | 3    | 1.02 | 0.38 | 0.62 |
|        | EDALMPPKLRLLK+Oxidation(4)                    |   |    | 0.95 | 2.2  | 2    |      |
|        | KTELSELEDGSAADWR                              |   |    | 1.17 | 2.1  | 2    |      |
| P43366 | MAGB1 Melanoma_associated antigen B1          | 2 | 4  | 16   | 1.03 | 0.40 | 0.99 |
|        | YKMREPIMK+Oxidation(2),Oxidation(7)           |   |    | 1.07 | 2.0  | 1    |      |
|        | YLKYEQVPNSDPPR                                |   |    | 0.98 | 2.2  | 2    |      |
| P43652 | AFAM Afamin                                   | 5 | 8  | 54   | 0.93 | 0.31 | 1.00 |
|        | AESPEVCFNEESPK                                |   |    | 0.91 | 3.1  | 2    |      |
|        | ESLLNHFLYEVAR                                 |   |    | 0.92 | 3.4  | 2    |      |
|        | FTDSENVQER                                    |   |    | 0.95 | 2.8  | 2    |      |
|        | IAPQLSTEELVSLGEK                              |   |    | 0.82 | 4.6  | 2    |      |
|        | SDVGFLPPFPTLDPEEK                             |   |    | 0.93 | 3.5  | 2    |      |
| P46939 | UTRO Utrophin                                 | 3 | 3  | 3    | 0.91 | 0.70 | 0.94 |
|        | DVMKDVMSDLQQTNSEK+Oxidation(2)                |   |    | 1.01 | 2.1  | 2    |      |

|        |       |                                                      |   |    |      |      |      |      |
|--------|-------|------------------------------------------------------|---|----|------|------|------|------|
|        |       |                                                      |   |    | 0.99 | 2.2  | 2    |      |
|        |       |                                                      |   |    | 0.57 | 2.2  | 2    |      |
| P46940 | IQGA1 | Ras GTPase_ activating_ like protein IQGAP1          | 4 | 6  | 11   | 0.93 | 0.40 | 0.93 |
|        |       | ATFYGEQVDYYK                                         |   |    | 0.75 | 2.6  | 2    |      |
|        |       | EELQSSISGVTAAYNR                                     |   |    | 1.01 | 2.8  | 2    |      |
|        |       | EQLSDMMINKKQK+Oxidation(5),Oxidation(6),Oxidation(7) |   |    | 0.62 | 1.9  | 1    |      |
|        |       | KNKEQLSDMMINK                                        |   |    | 1.09 | 2.1  | 2    |      |
| P48594 | SPB4  | Serpin B4                                            | 2 | 3  | 15   | 0.97 | 0.45 | 1.00 |
|        |       | INSWVESQTNEK                                         |   |    | 1.00 | 3.4  | 2    |      |
|        |       | TNSILFYGR                                            |   |    | 0.87 | 2.4  | 2    |      |
| P48741 | HSP77 | Putative heat shock 70 kDa protein 7                 | 2 | 3  | 25   | 0.98 | 0.45 | 1.00 |
|        |       | ATAGDTHLGGEDFDNR                                     |   |    | 1.07 | 3.9  | 2    |      |
|        |       | VEILANDQGNR                                          |   |    | 0.92 | 3.2  | 2    |      |
| P50395 | GDIB  | Rab GDP dissociation inhibitor beta                  | 5 | 6  | 26   | 0.94 | 0.37 | 1.00 |
|        |       | DLGTESQIFISR                                         |   |    | 1.02 | 3.8  | 2    |      |
|        |       | EIRPALELLEPIEQK                                      |   |    | 0.93 | 3.5  | 3    |      |
|        |       | FDLGQDVIDFTGHALALYR                                  |   |    | 0.90 | 3.5  | 3    |      |
|        |       | FVSISDLLVPK                                          |   |    | 0.95 | 2.5  | 2    |      |
|        |       | NTNDANSCQIIPQNVNR                                    |   |    | 0.85 | 2.7  | 2    |      |
| P51149 | RAB7A | Ras_ related protein Rab_7a                          | 3 | 6  | 12   | 0.95 | 0.29 | 0.76 |
|        |       | DPENFPFVVLGNK                                        |   |    | 0.61 | 3.3  | 2    |      |
|        |       | EAINVEQAFQTIAR                                       |   |    | 0.95 | 3.6  | 2    |      |
|        |       | FSNQYKATIGADFLTK                                     |   |    | 1.05 | 2.2  | 2    |      |
| P51884 | LUM   | Lumican                                              | 4 | 6  | 52   | 0.94 | 0.22 | 0.97 |
|        |       | FNALQYLR                                             |   |    | 0.90 | 2.8  | 2    |      |
|        |       | ISNIPDEYFK                                           |   |    | 0.95 | 2.8  | 2    |      |
|        |       | LKEDAVSAAFK                                          |   |    | 1.03 | 2.9  | 2    |      |
|        |       | NIPTVNENLENYYLEVNQLEK                                |   |    | 0.45 | 4.6  | 2    |      |
| P52209 | 6PGD  | 6_ phosphogluconate dehydrogenase_ decarboxylating   | 4 | 7  | 40   | 0.97 | 0.21 | 1.00 |
|        |       | GILFVSGVSGGEEGAR                                     |   |    | 1.02 | 4.4  | 2    |      |
|        |       | LVPLLDTGDIIDGGNSEYR                                  |   |    | 0.89 | 5.3  | 2    |      |
|        |       | SFLEDIRK                                             |   |    | 1.06 | 2.1  | 2    |      |
|        |       | VDDFLANEAK                                           |   |    | 0.96 | 2.6  | 2    |      |
| P53004 | BIEA  | Biliverdin reductase A                               | 2 | 2  | 4    | 1.11 | 0.85 | 0.76 |
|        |       | GSLLFAGPLEEER                                        |   |    | 0.96 | 2.7  | 2    |      |
|        |       | SGSLENVPNVGVNK                                       |   |    | 1.27 | 3.5  | 2    |      |
| P53634 | CATC  | Dipeptidyl peptidase 1                               | 3 | 7  | 23   | 0.91 | 0.20 | 0.83 |
|        |       | GTDECAIESIAVAATPIPK                                  |   |    | 0.92 | 4.0  | 2    |      |
|        |       | KVVVYLQK                                             |   |    | 0.97 | 2.3  | 2    |      |
|        |       | NSWGTGWGENGYFR                                       |   |    | 0.85 | 2.8  | 2    |      |
| P53804 | TTC3  | E3 ubiquitin_ protein ligase TTC3                    | 2 | 3  | 23   | 1.00 | 0.32 | 1.00 |
|        |       | SSQGSPSVVAPSPKTK                                     |   |    | 0.99 | 2.8  | 2    |      |
|        |       | VSNASEMYTQKNDGKEK+Oxidation(6)                       |   |    | 1.02 | 2.6  | 2    |      |
| P55072 | TERA  | Transitional endoplasmic reticulum ATPase            | 2 | 4  | 23   | 0.96 | 0.39 | 1.00 |
|        |       | LIVDEAINEDNSVLSQPK                                   |   |    | 0.97 | 4.4  | 2    |      |
|        |       | RSVSDNDIRK                                           |   |    | 0.92 | 1.9  | 1    |      |
| P60174 | TPIS  | Triosephosphate isomerase                            | 3 | 4  | 7    | 0.92 | 0.51 | 0.96 |
|        |       | ELASQPVDVGFLVGGASLKPEFVDIINAK                        |   |    | 0.85 | 3.5  | 3    |      |
|        |       | SNVSDAVAQSTR                                         |   |    | 0.90 | 3.0  | 2    |      |
|        |       | VVLAYEPVWAIGTGK                                      |   |    | 1.09 | 2.8  | 2    |      |
| P60660 | MYL6  | Myosin light polypeptide 6                           | 2 | 2  | 4    | 0.97 | 0.70 | 0.90 |
|        |       | HVLVTLGEK                                            |   |    | 1.03 | 2.2  | 2    |      |
|        |       | VLDFEHFLPMLQTVAK                                     |   |    | 0.76 | 3.9  | 3    |      |
| P61626 | LYSC  | Lysozyme C                                           | 6 | 28 | 295  | 0.97 | 0.14 | 1.00 |
|        |       | ATNYNAGDR                                            |   |    | 0.90 | 2.8  | 2    |      |
|        |       | AWVAWR                                               |   |    | 0.90 | 2.2  | 2    |      |
|        |       | GISLANWMCLAK+Oxidation(7)                            |   |    | 1.03 | 2.5  | 2    |      |
|        |       | QYVQCGV                                              |   |    | 0.99 | 2.1  | 1    |      |
|        |       | STDYGIFQINSR                                         |   |    | 0.97 | 4.9  | 2    |      |
|        |       | TPGAVNACHLSCSALLQDNIADAVACAK                         |   |    | 0.99 | 5.7  | 3    |      |
| P61769 | B2MG  | Beta_2_ microglobulin                                | 3 | 7  | 67   | 0.92 | 0.30 | 0.99 |
|        |       | SNFLNCYVSGFHPSDIEVDLLK                               |   |    | 0.46 | 3.9  | 2    |      |
|        |       | VEHSDLSFSK                                           |   |    | 0.95 | 3.4  | 3    |      |
|        |       | VNHVTLSQLPK                                          |   |    | 0.96 | 3.3  | 3    |      |
| P61916 | NPC2  | Epididymal secretory protein E1                      | 2 | 3  | 10   | 0.99 | 0.26 | 0.86 |
|        |       | AVVHGILMGVVPFPIPEPDGCK+Oxidation(7)                  |   |    | 0.94 | 3.4  | 3    |      |

|        |                                                 |    |    |     |      |      |      |  |
|--------|-------------------------------------------------|----|----|-----|------|------|------|--|
|        |                                                 |    |    |     | 1.21 | 3.3  | 2    |  |
| P61978 | HNRPK Heterogeneous nuclear ribonucleoprotein K | 2  | 4  | 7   | 1.05 | 0.45 | 0.99 |  |
|        | GSYDGLGGPIITTQVTIPK                             |    |    |     | 1.01 | 2.7  | 2    |  |
|        | TDYNASVSVPDSSGPER                               |    |    |     | 1.13 | 2.4  | 2    |  |
| P61981 | 1433G 14_3_3 protein gamma                      | 2  | 3  | 20  | 1.05 | 0.44 | 1.00 |  |
|        | NVTELNPLSNEER                                   |    |    |     | 1.05 | 4.1  | 2    |  |
|        | YLAEVATGEK                                      |    |    |     | 1.06 | 2.6  | 2    |  |
| P62158 | CALM Calmodulin                                 | 4  | 8  | 42  | 0.98 | 0.28 | 0.84 |  |
|        | DGNGYISAAELR                                    |    |    |     | 1.07 | 2.6  | 2    |  |
|        | EAFSLFDKDGDTITTK                                |    |    |     | 0.98 | 3.7  | 2    |  |
|        | MKDTDSEEEIR+Oxidation(0)                        |    |    |     | 1.08 | 3.7  | 3    |  |
|        | VFDKDGNGYISAAELR                                |    |    |     | 0.76 | 4.1  | 2    |  |
| P62258 | 1433E 14_3_3 protein epsilon                    | 4  | 4  | 9   | 0.86 | 0.34 | 0.31 |  |
|        | EAAENSLVAYK                                     |    |    |     | 0.66 | 2.1  | 2    |  |
|        | HLIPAANTGESK                                    |    |    |     | 1.07 | 2.5  | 2    |  |
|        | LICCDILDVLDK                                    |    |    |     | 0.95 | 3.4  | 2    |  |
|        | YLAEFATGNDR                                     |    |    |     | 0.78 | 2.3  | 2    |  |
| P62805 | H4 Histone H4                                   | 6  | 10 | 96  | 0.97 | 0.21 | 1.00 |  |
|        | DAVITYTEHAK                                     |    |    |     | 1.07 | 3.1  | 2    |  |
|        | DNIQGITKPAIR                                    |    |    |     | 0.96 | 2.5  | 2    |  |
|        | ISGLIYEETR                                      |    |    |     | 0.94 | 3.8  | 2    |  |
|        | TVTAMDVVYALK                                    |    |    |     | 0.92 | 3.2  | 2    |  |
|        | TVTAMDVVYALK+Oxidation(4)                       |    |    |     | 1.00 | 3.0  | 2    |  |
|        | VFLENVIR                                        |    |    |     | 0.93 | 2.7  | 2    |  |
| P62937 | PPIA Peptidyl_prolyl cis_trans isomerase A      | 4  | 9  | 44  | 0.92 | 0.28 | 0.99 |  |
|        | HTGPGILSMANAGPNTNGSQFFICTAK                     |    |    |     | 0.99 | 6.5  | 3    |  |
|        | IIPGFMCQGGDFTR                                  |    |    |     | 0.96 | 2.5  | 2    |  |
|        | KITIADCGQLE                                     |    |    |     | 0.96 | 3.6  | 2    |  |
|        | VSFELFADK                                       |    |    |     | 0.41 | 2.1  | 2    |  |
| P63104 | 1433Z 14_3_3 protein zeta/delta                 | 5  | 10 | 61  | 0.89 | 0.23 | 1.00 |  |
|        | DSTLIMQLLR                                      |    |    |     | 0.90 | 2.8  | 2    |  |
|        | DSTLIMQLLR+Oxidation(5)                         |    |    |     | 0.91 | 3.1  | 2    |  |
|        | GIVDQSQQAYQEAFFEISK                             |    |    |     | 0.63 | 4.8  | 2    |  |
|        | SVTEQGAELSNEER                                  |    |    |     | 0.95 | 4.9  | 2    |  |
|        | YLAEVAAGDDKK                                    |    |    |     | 0.88 | 3.3  | 2    |  |
| P63261 | ACTG Actin_cytoplasmic 2                        | 10 | 63 | 526 | 0.98 | 0.09 | 1.00 |  |
|        | CPEALFQPSFLGMESCGIHETTFNSIMK                    |    |    |     | 0.80 | 5.0  | 3    |  |
|        | CPEALFQPSFLGMESCGIHETTFNSIMK+Oxidation(12)      |    |    |     | 0.81 | 3.2  | 3    |  |
|        | DLYANTVLSGGTTMYPGIADR                           |    |    |     | 0.94 | 4.7  | 2    |  |
|        | DLYANTVLSGGTTMYPGIADR+Oxidation(13)             |    |    |     | 0.98 | 5.7  | 2    |  |
|        | GYSFTTTER                                       |    |    |     | 0.99 | 3.4  | 2    |  |
|        | KDLYANTVLSGGTTMYPGIADR                          |    |    |     | 1.01 | 4.9  | 2    |  |
|        | KDLYANTVLSGGTTMYPGIADR+Oxidation(14)            |    |    |     | 0.96 | 4.7  | 3    |  |
|        | TTGIVMDSGDGVTHTVPIYEGYALPHAILR                  |    |    |     | 0.96 | 4.6  | 3    |  |
|        | TTGIVMDSGDGVTHTVPIYEGYALPHAILR+Oxidation(5)     |    |    |     | 0.98 | 5.1  | 4    |  |
|        | VAPEEHPVLLTEAPLNPK                              |    |    |     | 1.05 | 4.2  | 3    |  |
| P67936 | TPM4 Tropomyosin alpha_4 chain                  | 4  | 5  | 49  | 0.90 | 0.34 | 1.00 |  |
|        | IQALQQQADEAEDR                                  |    |    |     | 0.86 | 4.2  | 2    |  |
|        | IQLVEEELDR                                      |    |    |     | 0.92 | 3.1  | 2    |  |
|        | MEIQEMQLK+Oxidation(0),Oxidation(5)             |    |    |     | 0.81 | 2.1  | 1    |  |
|        | YSEKEDKYEEIEK                                   |    |    |     | 0.93 | 3.7  | 3    |  |
| P68133 | ACTS Actin_alpha skeletal muscle                | 9  | 38 | 244 | 0.93 | 0.13 | 1.00 |  |
|        | DLTDYLMK                                        |    |    |     | 1.00 | 2.1  | 1    |  |
|        | DLTDYLMK+Oxidation(6)                           |    |    |     | 0.93 | 2.6  | 2    |  |
|        | DSYVGDEAQS                                      |    |    |     | 0.99 | 3.4  | 2    |  |
|        | EITALAPSTMK+Oxidation(9)                        |    |    |     | 0.92 | 2.8  | 2    |  |
|        | HQGVMVGMGQK+Oxidation(4)                        |    |    |     | 1.00 | 4.3  | 3    |  |
|        | HQGVMVGMGQK+Oxidation(4),Oxidation(7)           |    |    |     | 0.87 | 3.8  | 3    |  |
|        | HQGVMVGMGQK+Oxidation(7)                        |    |    |     | 0.97 | 3.3  | 3    |  |
|        | YPIEHGIITNWDDMEK                                |    |    |     | 0.91 | 3.7  | 3    |  |
|        | YPIEHGIITNWDDMEK+Oxidation(13)                  |    |    |     | 0.92 | 3.7  | 2    |  |
| P68366 | TBA4A Tubulin alpha_4A chain                    | 2  | 4  | 16  | 0.95 | 0.31 | 1.00 |  |
|        | IHFPLATYAPVISA                                  |    |    |     | 0.99 | 2.6  | 2    |  |
|        | SIQFVDWCPTGFK                                   |    |    |     | 0.93 | 3.8  | 2    |  |
| P68371 | TBB2C Tubulin beta_2C chain                     | 2  | 3  | 13  | 0.98 | 0.48 | 0.96 |  |
|        | INVYYNEATGGK                                    |    |    |     | 1.01 | 3.3  | 2    |  |
|        | MSATFIGNSTAIQELFK                               |    |    |     | 0.83 | 4.1  | 2    |  |

|        |       |                                                |    |    |      |      |      |      |
|--------|-------|------------------------------------------------|----|----|------|------|------|------|
| P68871 | HBB   | Hemoglobin subunit beta                        | 6  | 68 | 1097 | 1.00 | 0.08 | 1.00 |
|        |       | EFTPPVQAAYQK                                   |    |    | 1.07 | 3.1  | 2    |      |
|        |       | FFESFGDLSTPDAVMGNPK                            |    |    | 0.90 | 5.3  | 2    |      |
|        |       | FFESFGDLSTPDAVMGNPK+Oxidation(14)              |    |    | 0.96 | 5.3  | 2    |      |
|        |       | GTFATLSELHCDK                                  |    |    | 1.00 | 4.1  | 2    |      |
|        |       | SAVTALWGK                                      |    |    | 0.95 | 3.2  | 2    |      |
|        |       | VNVDEVGGEALGR                                  |    |    | 1.05 | 4.7  | 2    |      |
| P69905 | HBA   | Hemoglobin subunit alpha                       | 11 | 71 | 786  | 0.98 | 0.08 | 1.00 |
|        |       | FLASVSTVLTSK                                   |    |    | 0.96 | 4.0  | 2    |      |
|        |       | KVADALTNAVAHVDDMPNALSALSDDLHAHK                |    |    | 0.97 | 5.7  | 4    |      |
|        |       | KVADALTNAVAHVDDMPNALSALSDDLHAHK+Oxidation(15)  |    |    | 1.02 | 4.6  | 4    |      |
|        |       | LLSHCLLVTLAAHLPAEFTPAVHASLDK                   |    |    | 0.93 | 6.6  | 4    |      |
|        |       | LRVDPVNFK                                      |    |    | 1.01 | 3.0  | 3    |      |
|        |       | MFLSFPTTK                                      |    |    | 0.91 | 2.9  | 2    |      |
|        |       | MFLSFPTTK+Oxidation(0)                         |    |    | 0.98 | 2.8  | 2    |      |
|        |       | TYFPHFDLSHGSAQVK                               |    |    | 0.97 | 4.2  | 2    |      |
|        |       | VADALTNAVAHVDDMPNALSALSDDLHAHK                 |    |    | 0.95 | 6.1  | 3    |      |
|        |       | VADALTNAVAHVDDMPNALSALSDDLHAHK+Oxidation(14)   |    |    | 1.01 | 5.7  | 3    |      |
|        |       | VGAHAGEYGAEALER                                |    |    | 1.01 | 5.4  | 3    |      |
| P78316 | NOP14 | Nucleolar protein 14                           | 3  | 7  | 20   | 0.99 | 0.19 | 1.00 |
|        |       | IQKNHPSLAEGNK                                  |    |    | 0.99 | 2.1  | 2    |      |
|        |       | QLFNSLATQEGEWKALK                              |    |    | 0.93 | 2.2  | 2    |      |
|        |       | RTQTLLKEYK                                     |    |    | 1.01 | 2.2  | 2    |      |
| P78527 | PRKDC | DNA_dependent protein kinase catalytic subunit | 3  | 3  | 10   | 1.08 | 0.46 | 0.57 |
|        |       | FKTLSEKNITQK                                   |    |    | 0.93 | 2.4  | 2    |      |
|        |       | IRVVQMLGSLGGQINK+Oxidation(5)                  |    |    | 0.90 | 2.1  | 2    |      |
|        |       | QFINLMLPMK+Oxidation(8)                        |    |    | 1.84 | 2.1  | 2    |      |
| P78559 | MAP1A | Microtubule_associated protein 1A              | 2  | 2  | 2    | 0.98 | 0.38 | 0.94 |
|        |       | LDMYVLNPVKDSK                                  |    |    | 1.03 | 2.3  | 2    |      |
|        |       | SREAFGGRELGLQGK                                |    |    | 0.97 | 2.3  | 2    |      |
| P80188 | NGAL  | Neutrophil gelatinase_associated lipocalin     | 3  | 8  | 52   | 0.92 | 0.21 | 0.44 |
|        |       | SLGLPENHIVFPVPIDQCIDG                          |    |    | 0.87 | 3.9  | 2    |      |
|        |       | SYPGLTSYLVR                                    |    |    | 0.90 | 2.2  | 2    |      |
|        |       | TFVPGCQPGFEFTLGNIK                             |    |    | 0.98 | 3.5  | 2    |      |
| P80723 | BASP1 | Brain acid soluble protein 1                   | 2  | 3  | 8    | 0.96 | 0.43 | 0.98 |
|        |       | AEPKKAPEQEQAAPGPAAGGEAPK                       |    |    | 0.93 | 3.0  | 3    |      |
|        |       | AQGPAASAEKPKVEAPAANSQDTVTVKE                   |    |    | 0.97 | 4.7  | 3    |      |
| P80748 | LV302 | Ig lambda chain V_III region LOI               | 2  | 10 | 74   | 1.00 | 0.20 | 1.00 |
|        |       | FSGSNSGNTATLTISR                               |    |    | 1.03 | 4.3  | 2    |      |
|        |       | YVLTQPPSVSVAPGETAR                             |    |    | 0.94 | 3.9  | 2    |      |
| P82987 | ATL3  | ADAMTS_like protein 3                          | 2  | 2  | 2    | 1.03 | 0.53 | 0.96 |
|        |       | EENVIAVPLGSRSVR                                |    |    | 1.00 | 2.1  | 2    |      |
|        |       | SCQMPECSKIKSEM+Oxidation(13)                   |    |    | 1.11 | 2.1  | 2    |      |
| P98088 | MUC5A | Mucin-5AC (Fragments)                          | 3  | 4  | 21   | 0.96 | 0.41 | 0.88 |
|        |       | GQTCGLCGNFNSIQADDFR                            |    |    | 1.07 | 3.3  | 2    |      |
|        |       | IQCCETVNVCR                                    |    |    | 0.99 | 3.0  | 2    |      |
|        |       | SVVGDVLEFGNSWK                                 |    |    | 0.86 | 2.8  | 2    |      |
| Q01484 | ANK2  | Ankyrin_2                                      | 4  | 11 | 79   | 1.15 | 0.22 | 0.60 |
|        |       | ATSPLIEETPIGSIK                                |    |    | 1.43 | 2.1  | 1    |      |
|        |       | ATSPLIEETPIGSIKDK                              |    |    | 1.02 | 2.7  | 2    |      |
|        |       | HGADQDAHTKLGYTPLIVACHYGNVK                     |    |    | 1.32 | 2.1  | 2    |      |
|        |       | QKEEGLQASAEK                                   |    |    | 1.30 | 2.2  | 2    |      |
| Q01518 | CAP1  | Adenylyl cyclase_associated protein 1          | 4  | 6  | 31   | 0.93 | 0.19 | 0.57 |
|        |       | ALLVTASQCQQAENK                                |    |    | 1.02 | 4.1  | 2    |      |
|        |       | LSDLLAPISESIK                                  |    |    | 0.95 | 3.2  | 2    |      |
|        |       | NSLDCEIVSAK                                    |    |    | 0.98 | 2.7  | 2    |      |
|        |       | VENQENVSNLVIETELK                              |    |    | 0.88 | 4.0  | 2    |      |
| Q02224 | CENPE | Centromere_associated protein E                | 2  | 3  | 4    | 1.08 | 0.49 | 0.76 |
|        |       | LNENYEEVK                                      |    |    | 1.24 | 1.9  | 1    |      |
|        |       | QEQLNMKEK                                      |    |    | 1.00 | 1.9  | 1    |      |
| Q04917 | 1433F | 14_3_3 protein eta                             | 3  | 3  | 18   | 0.93 | 0.44 | 1.00 |
|        |       | AVTELNEPLSNEDR                                 |    |    | 0.98 | 3.2  | 2    |      |
|        |       | ELETVCNDVLSLLDK                                |    |    | 0.89 | 3.6  | 2    |      |
|        |       | YLAEVASGEK                                     |    |    | 0.92 | 2.5  | 2    |      |
| Q05086 | UBE3A | Ubiquitin_protein ligase E3A                   | 2  | 3  | 4    | 0.98 | 0.48 | 0.97 |
|        |       | AFRRGFHMVTNESPLK                               |    |    | 1.00 | 2.3  | 2    |      |
|        |       | EFVNLYSYDYLNK                                  |    |    | 0.90 | 2.2  | 2    |      |

|        |                                         |                                                            |    |    |      |      |      |      |
|--------|-----------------------------------------|------------------------------------------------------------|----|----|------|------|------|------|
| Q06830 | PRDX1                                   | Peroxiredoxin_1                                            | 6  | 11 | 87   | 0.99 | 0.20 | 0.95 |
|        | ADEGISFR                                |                                                            |    |    | 0.95 | 2.2  | 2    |      |
|        | HGEVCPAGWKPGSDTIKPDVQK                  |                                                            |    |    | 1.03 | 5.3  | 4    |      |
|        | LNCQVIGASVDSHFCHLAWVNTPK                |                                                            |    |    | 0.92 | 4.5  | 4    |      |
|        | LVQAFQFTDK                              |                                                            |    |    | 0.86 | 3.3  | 2    |      |
|        | QGGLGPMNIPLVSDPK                        |                                                            |    |    | 0.98 | 3.0  | 2    |      |
|        | TIAQDYGVLK                              |                                                            |    |    | 1.07 | 2.9  | 2    |      |
| Q08380 | LG3BP                                   | Galectin_3_binding protein                                 | 11 | 26 | 285  | 0.93 | 0.12 | 1.00 |
|        | ASHEEVEGLVEK                            |                                                            |    |    | 0.97 | 3.7  | 3    |      |
|        | AVDTWSWGER                              |                                                            |    |    | 0.82 | 3.2  | 2    |      |
|        | ELSEALGQIFDSQR                          |                                                            |    |    | 0.97 | 4.8  | 2    |      |
|        | IDITLSSVK                               |                                                            |    |    | 0.95 | 2.5  | 2    |      |
|        | RIDITLSSVK                              |                                                            |    |    | 0.95 | 2.9  | 2    |      |
|        | SDLAVPSELALLK                           |                                                            |    |    | 0.94 | 3.6  | 2    |      |
|        | STHTLDLSR                               |                                                            |    |    | 0.85 | 3.0  | 3    |      |
|        | STSSFPCPAGHFNGFR                        |                                                            |    |    | 0.88 | 3.0  | 2    |      |
|        | TLQALEFHTVPFQLLAR                       |                                                            |    |    | 0.96 | 5.0  | 2    |      |
|        | YSSDYFQAPSDYR                           |                                                            |    |    | 0.87 | 4.3  | 2    |      |
|        | YYPYQSFQTPQHPSFLFQDK                    |                                                            |    |    | 1.03 | 3.5  | 2    |      |
| Q09666 | AHNK                                    | Neuroblast differentiation_associated protein AHNAK        | 3  | 3  | 5    | 1.06 | 0.47 | 0.92 |
|        | AEGPEVDVNLPK                            |                                                            |    |    | 1.02 | 2.2  | 2    |      |
|        | APKVKMPDVIDSVPK+Oxidation(5)            |                                                            |    |    | 0.98 | 2.2  | 2    |      |
|        | FKMPEMHFK+Oxidation(2),Oxidation(5)     |                                                            |    |    | 1.18 | 1.8  | 1    |      |
| Q12805 | FBLN3                                   | EGF_containing fibulin_like extracellular matrix protein 1 | 7  | 9  | 57   | 0.95 | 0.23 | 1.00 |
|        | ADQVCINLR                               |                                                            |    |    | 1.03 | 3.4  | 2    |      |
|        | CVNHYGGYLCLPK                           |                                                            |    |    | 0.85 | 3.6  | 3    |      |
|        | DIDECDIVPDACK                           |                                                            |    |    | 0.99 | 3.0  | 2    |      |
|        | FSCMCPQGYQVVR+Oxidation(3)              |                                                            |    |    | 1.00 | 2.9  | 2    |      |
|        | GSFACQCPPGYQK                           |                                                            |    |    | 0.89 | 4.2  | 2    |      |
|        | IQCAAGYEQSEHNVCQDIDECTAGTHNCR           |                                                            |    |    | 0.91 | 4.1  | 4    |      |
|        | TCQDINECETTNECR                         |                                                            |    |    | 0.91 | 4.3  | 2    |      |
| Q12923 | PTN13                                   | Tyrosine_protein phosphatase non_receptor type 13          | 2  | 5  | 54   | 1.03 | 0.26 | 0.94 |
|        | CSTYQIKGSPNLTLPK                        |                                                            |    |    | 1.00 | 2.9  | 2    |      |
|        | QQPQLLK                                 |                                                            |    |    | 1.07 | 1.9  | 1    |      |
| Q13228 | SBP1                                    | Selenium_binding protein 1                                 | 4  | 6  | 30   | 0.96 | 0.24 | 1.00 |
|        | FLHNPDAAQGFVGCALSSTIQR                  |                                                            |    |    | 1.00 | 3.1  | 3    |      |
|        | HEIVQTLCLK                              |                                                            |    |    | 0.90 | 2.4  | 2    |      |
|        | IYVVDVGSEPR                             |                                                            |    |    | 0.96 | 2.6  | 2    |      |
|        | NTGTEAPDYLATVDVDPK                      |                                                            |    |    | 0.95 | 3.6  | 2    |      |
| Q13421 | MSLN                                    | Mesothelin                                                 | 3  | 5  | 38   | 1.05 | 0.30 | 0.26 |
|        | IQSFLGGAPTEDLK                          |                                                            |    |    | 1.14 | 3.8  | 2    |      |
|        | QLLGFPCEVSGLSTER                        |                                                            |    |    | 1.02 | 3.0  | 2    |      |
|        | TDAVLPLTVAEVQK                          |                                                            |    |    | 0.99 | 3.2  | 2    |      |
| Q13439 | GOGA4                                   | Golgin subfamily A member 4                                | 2  | 5  | 7    | 1.02 | 0.32 | 0.98 |
|        | IAELREELQMDQQAkk+Oxidation(9)           |                                                            |    |    | 1.01 | 2.3  | 2    |      |
|        | MKQELEAKMDEQK+Oxidation(0),Oxidation(8) |                                                            |    |    | 1.04 | 1.8  | 1    |      |
| Q13588 | GRAP                                    | GRB2_related adapter protein                               | 2  | 4  | 44   | 0.99 | 0.34 | 0.97 |
|        | ISRQLAEEILMK                            |                                                            |    |    | 0.97 | 2.2  | 2    |      |
|        | YFLWEEK                                 |                                                            |    |    | 1.02 | 2.2  | 1    |      |
| Q13751 | LAMB3                                   | Laminin subunit beta_3                                     | 2  | 2  | 5    | 1.02 | 0.36 | 0.51 |
|        | GSQAIMLRADLTGLEKR                       |                                                            |    |    | 0.90 | 2.2  | 2    |      |
|        | QAGGGGGTGSPKLVALR                       |                                                            |    |    | 1.11 | 2.3  | 2    |      |
| Q13938 | CAYP1                                   | Calciphosin                                                | 8  | 12 | 114  | 0.94 | 0.20 | 0.97 |
|        | EAVIAAAFAK                              |                                                            |    |    | 1.07 | 3.1  | 2    |      |
|        | FLDNFDSSEK                              |                                                            |    |    | 0.96 | 2.8  | 2    |      |
|        | GASGIQGLAR                              |                                                            |    |    | 0.85 | 2.2  | 2    |      |
|        | LGLVLDQAEAEVCR                          |                                                            |    |    | 0.93 | 4.5  | 2    |      |
|        | NGSGTLDLEEFLLR                          |                                                            |    |    | 0.78 | 3.0  | 2    |      |
|        | SGDGVVTVDDLRLR                          |                                                            |    |    | 1.01 | 3.4  | 2    |      |
|        | SGEWTEDEVLLR                            |                                                            |    |    | 0.81 | 2.7  | 2    |      |
|        | SLDADEFRR                               |                                                            |    |    | 0.62 | 2.5  | 2    |      |
| Q14019 | COTL1                                   | Coactosin_like protein                                     | 3  | 6  | 26   | 1.00 | 0.27 | 1.00 |
|        | DDGSAVIWVTFK                            |                                                            |    |    | 1.10 | 4.0  | 2    |      |
|        | KELEEDFIK                               |                                                            |    |    | 1.04 | 2.4  | 2    |      |

|        |                                                                       |   |    |    |       |      |      |  |
|--------|-----------------------------------------------------------------------|---|----|----|-------|------|------|--|
|        |                                                                       |   |    |    | 0.95  | 3.7  | 3    |  |
| Q14508 | WFDC2 WAP four_disulfide core domain protein 2                        | 2 | 2  | 16 | 0.98  | 0.54 | 1.00 |  |
|        | CCSAGCATFCSLPNDK                                                      |   |    |    | 0.98  | 4.2  | 2    |  |
|        | EGSCPQVNINFPQLGLCR                                                    |   |    |    | 0.98  | 4.2  | 3    |  |
| Q14624 | ITIH4 Inter_alpha_trypsin inhibitor heavy chain H4                    | 6 | 11 | 51 | 1.03  | 0.22 | 0.99 |  |
|        | AEAQAQYSAAVAK                                                         |   |    |    | 0.96  | 4.6  | 2    |  |
|        | AGFSWIEVTFK                                                           |   |    |    | 1.16  | 3.8  | 2    |  |
|        | EKAEAQAQYSAAVAK                                                       |   |    |    | 1.35  | 3.0  | 2    |  |
|        | NPLVWVHASPEHVVVTR                                                     |   |    |    | 0.98  | 3.5  | 3    |  |
|        | QGPVNLLSDPEQGVVETGQYER                                                |   |    |    | 0.98  | 4.0  | 2    |  |
|        | SPEQQETVLDGNLIIR                                                      |   |    |    | 0.97  | 3.2  | 2    |  |
| Q14651 | PLSI Plastin_1                                                        | 2 | 3  | 19 | 1.00  | 0.52 | 1.00 |  |
|        | IENCNYAVELGK                                                          |   |    |    | 0.91  | 2.6  | 2    |  |
|        | KIENCNYAVELGK                                                         |   |    |    | 1.07  | 4.2  | 2    |  |
| Q15019 | SEPT2 Septin_2                                                        | 2 | 2  | 2  | 1.02  | 1.12 | 0.97 |  |
|        | ASIPFSVVGSNQLIEAK                                                     |   |    |    | 1.08  | 2.5  | 2    |  |
|        | KVENEDMNKDQILLEK                                                      |   |    |    | 0.96  | 2.2  | 2    |  |
| Q15154 | PCM1 Pericentriolar material 1 protein                                | 2 | 2  | 3  | 1.00  | 0.31 | 0.99 |  |
|        | QLGSILQDSLAK                                                          |   |    |    | 1.02  | 2.3  | 2    |  |
|        | YMSQMSVPEQAELEK                                                       |   |    |    | 0.99  | 2.3  | 2    |  |
| Q15582 | BGH3 Transforming growth factor_beta_induced protein ig_h3            | 6 | 10 | 47 | 0.99  | 0.17 | 0.99 |  |
|        | EGVYTVFAPTNEAFR                                                       |   |    |    | 1.00  | 3.3  | 2    |  |
|        | GDELADSALEIFK                                                         |   |    |    | 0.97  | 3.8  | 2    |  |
|        | LTLAPLNSVFK                                                           |   |    |    | 0.82  | 2.7  | 2    |  |
|        | SLQGDKLEVSLK                                                          |   |    |    | 1.11  | 2.5  | 2    |  |
|        | STVISYECCPGYEK                                                        |   |    |    | 1.00  | 3.7  | 2    |  |
|        | YHIGDEILVSGGIGALVR                                                    |   |    |    | 1.03  | 4.1  | 3    |  |
| Q16445 | GBRA6 Gamma_aminobutyric acid receptor subunit alpha_6                | 2 | 3  | 4  | 0.89  | 0.56 | 0.94 |  |
|        | IWTPDTFFRNGKK                                                         |   |    |    | 0.91  | 2.2  | 2    |  |
|        | LEVEGNFYSENVSR                                                        |   |    |    | 0.84  | 1.8  | 1    |  |
| Q2NKX8 | ERC6L DNA excision repair protein ERCC_6_like                         | 2 | 2  | 2  | 0.90  | 0.80 | 0.63 |  |
|        | DDEPEEVVVKAK                                                          |   |    |    | 0.56  | 2.2  | 2    |  |
|        | NEGAWLREPVPFSSTKK                                                     |   |    |    | 1.03  | 2.3  | 2    |  |
| Q2VYF4 | LETM2 LETM1 domain_containing protein LETM2_mitochondrial             | 2 | 3  | 7  | 0.92  | 0.42 | 0.93 |  |
|        | ENMVDLAPQLK                                                           |   |    |    | 0.97  | 2.2  | 2    |  |
|        | MAVKLELAKFLQETMTEMAR+Oxidation(14),Oxidation(17)                      |   |    |    | 0.87  | 2.7  | 2    |  |
| Q3B7T1 | EDRF1 Erythroid differentiation_related factor 1                      | 2 | 2  | 4  | 0.96  | 0.72 | 0.93 |  |
|        | QMALFLDKMGLKGNYSQSGMIPGSWQHK+Oxidation(22)                            |   |    |    | 0.91  | 3.1  | 3    |  |
|        | TAFARLEEKTDLK                                                         |   |    |    | 1.03  | 2.3  | 2    |  |
| Q3V6T2 | GRDN Girdin                                                           | 4 | 4  | 5  | 2.51  | 0.75 | 0.55 |  |
|        | EDLKSLYDSLK                                                           |   |    |    | 1.34  | 2.3  | 2    |  |
|        | MVQSSPPIGEDNK                                                         |   |    |    | 0.62  | 2.1  | 2    |  |
|        | SLEQETSQLEKDKK                                                        |   |    |    | 13.93 | 2.3  | 2    |  |
|        | WERESQETTRELLK                                                        |   |    |    | 0.61  | 2.2  | 2    |  |
| Q3ZCM7 | TBB8 Tubulin beta_8 chain                                             | 3 | 3  | 3  | 0.98  | 0.76 | 0.97 |  |
|        | AVLDLEPGTMDSVR                                                        |   |    |    | 1.06  | 2.9  | 2    |  |
|        | EAESCDCLQGFQLTHSLGGTGSGMGTLLLSK                                       |   |    |    | 0.89  | 3.0  | 3    |  |
|        | NMMAACDPR+Oxidation(1),Oxidation(2)                                   |   |    |    | 0.91  | 2.4  | 2    |  |
| Q4G0P3 | HYDIN Hydrocephalus_inducing protein homolog                          | 2 | 4  | 9  | 1.00  | 0.46 | 0.78 |  |
|        | EQTMSEKEELNK+Oxidation(3)                                             |   |    |    | 1.11  | 2.5  | 2    |  |
|        | FKTYELTLKDVQNILMYWDR                                                  |   |    |    | 0.79  | 2.2  | 2    |  |
| Q4KWH8 | PLCH1 1_phosphatidylinositol_4_5_bisphosphate phosphodiesterase eta_1 | 2 | 2  | 2  | 0.99  | 0.40 | 0.47 |  |
|        | DHLTVEELAQFLKVEQK                                                     |   |    |    | 0.91  | 2.4  | 2    |  |
|        | MNNVTTDYCLDIK+Oxidation(0)                                            |   |    |    | 1.22  | 2.3  | 2    |  |
| Q4LE39 | ARI4B AT_rich interactive domain_containing protein 4B                | 2 | 3  | 6  | 0.94  | 0.34 | 0.76 |  |
|        | MTPTKKYNGLEEK+Oxidation(0)                                            |   |    |    | 0.97  | 2.3  | 2    |  |
|        | NQKMYEASIK                                                            |   |    |    | 0.92  | 2.1  | 2    |  |
| Q5M9N0 | CD158 Coiled_coil domain_containing protein 158                       | 2 | 2  | 9  | 1.03  | 0.60 | 0.90 |  |
|        | QMAAIQGKNESLEK                                                        |   |    |    | 0.94  | 2.4  | 2    |  |
|        | TEEDGRTSLGALEDVR                                                      |   |    |    | 1.12  | 2.4  | 2    |  |
| Q5T4S7 | UBR4 E3 ubiquitin_protein ligase UBR4                                 | 2 | 8  | 36 | 1.03  | 0.26 | 0.89 |  |
|        | EEKNLQGFLEQPK                                                         |   |    |    | 1.07  | 2.2  | 2    |  |
|        | VNRQQLVK                                                              |   |    |    | 1.01  | 2.1  | 1    |  |

|        |       |                                                      |   |   |     |      |      |      |
|--------|-------|------------------------------------------------------|---|---|-----|------|------|------|
| Q5TBA9 | FRY   | Protein furry homolog                                | 2 | 2 | 2   | 1.01 | 0.30 | 0.93 |
|        |       | MIGMSLYYSQVRK+Oxidation(3)                           |   |   |     | 1.02 | 2.3  | 2    |
|        |       | QENLPKHCPALTASYAWPYAFTR                              |   |   |     | 0.97 | 3.3  | 3    |
| Q5VST9 | OBSCN | Obscurin                                             | 2 | 2 | 8   | 1.00 | 0.33 | 0.81 |
|        |       | FIEDVK                                               |   |   |     | 0.88 | 2.2  | 2    |
|        |       | TSASLTIRPMPAHFIGR+Oxidation(9)                       |   |   |     | 1.06 | 2.4  | 2    |
| Q5VTE0 | EF1A3 | Putative elongation factor 1_alpha_like 3            | 6 | 9 | 120 | 1.00 | 0.24 | 0.94 |
|        |       | EHALLAYTLGVK                                         |   |   |     | 0.97 | 2.6  | 2    |
|        |       | IGGIGTVPVGR                                          |   |   |     | 1.05 | 2.9  | 2    |
|        |       | STTTGHLIYK                                           |   |   |     | 1.16 | 2.8  | 2    |
|        |       | THINIVVIGHVDSGK                                      |   |   |     | 0.87 | 4.2  | 3    |
|        |       | VETGVLKPGMVVTFAPVNVTEVK                              |   |   |     | 0.91 | 3.7  | 3    |
|        |       | VETGVLKPGMVVTFAPVNVTEVK+Oxidation(9)                 |   |   |     | 0.98 | 4.5  | 3    |
| Q5VZK9 | LR16A | Leucine_rich repeat_containing protein 16A           | 2 | 2 | 2   | 1.15 | 0.76 | 0.69 |
|        |       | FMPIPMYDASQALK                                       |   |   |     | 1.02 | 2.4  | 2    |
|        |       | NVLLEQSGIDILNK                                       |   |   |     | 1.43 | 1.8  | 1    |
| Q5XKE5 | K2C79 | Keratin_type II cytoskeletal 79                      | 2 | 2 | 8   | 0.65 | 0.81 | 0.21 |
|        |       | FLEQQNKVLETK                                         |   |   |     | 0.65 | 3.7  | 2    |
|        |       | NLDLDSIIAEVK                                         |   |   |     | 0.66 | 3.3  | 2    |
| Q6P1M3 | L2GL2 | Lethal(2) giant larvae protein homolog 2             | 2 | 2 | 3   | 0.96 | 0.39 | 0.95 |
|        |       | LTFSEDEQLESAGGKVK                                    |   |   |     | 0.97 | 2.4  | 2    |
|        |       | TISSDAVLQR                                           |   |   |     | 0.95 | 2.1  | 2    |
| Q6P1M9 | ARMX5 | Armadillo repeat_containing X_linked protein 5       | 2 | 2 | 3   | 1.01 | 0.63 | 0.99 |
|        |       | AMPMSRVSTVTK+Oxidation(1),Oxidation(3)               |   |   |     | 1.09 | 2.1  | 2    |
|        |       | NHANTRELISAK                                         |   |   |     | 0.98 | 2.1  | 2    |
| Q6Q759 | SPG17 | Sperm_associated antigen 17                          | 2 | 2 | 3   | 0.96 | 0.45 | 0.97 |
|        |       | TMFEKGPFTIKVVR+Oxidation(1)                          |   |   |     | 0.94 | 2.2  | 2    |
|        |       | VVIVERK                                              |   |   |     | 0.99 | 2.1  | 2    |
| Q6TFL3 | CI093 | Uncharacterized protein C9orf93                      | 2 | 6 | 50  | 0.95 | 0.37 | 1.00 |
|        |       | EKAQAAQSESELQK                                       |   |   |     | 0.94 | 3.2  | 2    |
|        |       | TNETEKAFQTSQQK                                       |   |   |     | 0.97 | 1.9  | 1    |
| Q6ZRK6 | CCD73 | Coiled_coil domain_containing protein 73             | 3 | 5 | 6   | 0.87 | 0.39 | 0.79 |
|        |       | QQIQANTEMEAELKVLK                                    |   |   |     | 0.85 | 2.3  | 2    |
|        |       | VSEMEQKVQLHLLAK+Oxidation(3)                         |   |   |     | 1.04 | 2.3  | 2    |
|        |       | YSLRNSSNMLDDK+Oxidation(9)                           |   |   |     | 0.68 | 1.9  | 1    |
| Q70EL1 | UBP54 | Inactive ubiquitin carboxyl_terminal hydrolase 54    | 2 | 2 | 2   | 0.97 | 0.50 | 0.70 |
|        |       | NSSPSDSKPPFSQGQEK                                    |   |   |     | 0.90 | 2.2  | 2    |
|        |       | SRTDNSWAPWSETNQHIGTR                                 |   |   |     | 1.10 | 2.3  | 2    |
| Q7RTS7 | K2C74 | Keratin_type II cytoskeletal 74                      | 2 | 2 | 4   | 0.60 | 0.99 | 0.39 |
|        |       | DLDLDSIIAEVR                                         |   |   |     | 0.55 | 2.2  | 2    |
|        |       | FLEQQNQVLETK                                         |   |   |     | 0.65 | 3.7  | 2    |
| Q7RTV2 | GSTA5 | Glutathione S_transferase A5                         | 2 | 2 | 18  | 0.99 | 0.41 | 0.89 |
|        |       | AILNYIASK                                            |   |   |     | 1.05 | 3.1  | 2    |
|        |       | ISNLPTVK                                             |   |   |     | 0.91 | 2.2  | 2    |
| Q7RTW8 | OTOAN | Otoancorin                                           | 2 | 2 | 4   | 0.95 | 0.42 | 0.95 |
|        |       | CFQMLNSLECVEILGK                                     |   |   |     | 0.94 | 2.1  | 2    |
|        |       | DCPDLNPEQKAAVRLK                                     |   |   |     | 0.98 | 2.3  | 2    |
| Q7Z4S6 | KI21A | Kinesin_like protein KIF21A                          | 2 | 5 | 28  | 0.99 | 0.28 | 1.00 |
|        |       | LQTLKKQYEEK                                          |   |   |     | 0.92 | 2.1  | 1    |
|        |       | VMVNQDRASQQINALR+Oxidation(1)                        |   |   |     | 1.02 | 2.4  | 2    |
| Q7Z5N4 | SDK1  | Protein sidekick_1                                   | 2 | 2 | 6   | 0.97 | 0.50 | 0.99 |
|        |       | LMLPEEPPSAPPK+Oxidation(1)                           |   |   |     | 0.86 | 2.4  | 2    |
|        |       | YIIPSLQK                                             |   |   |     | 1.01 | 2.3  | 2    |
| Q7Z6B7 | SRGP1 | SLIT_ROBO Rho GTPase_activating protein 1            | 2 | 2 | 3   | 1.04 | 0.34 | 0.94 |
|        |       | KAEIETEYSRNLEK                                       |   |   |     | 1.09 | 2.4  | 2    |
|        |       | SQYNTKLFNGDLETQVK                                    |   |   |     | 1.02 | 2.1  | 2    |
| Q86V48 | LUZP1 | Leucine zipper protein 1                             | 2 | 3 | 5   | 1.03 | 0.45 | 0.96 |
|        |       | IEGKDEEIK                                            |   |   |     | 0.99 | 1.8  | 1    |
|        |       | MNRDYTRNASNLER                                       |   |   |     | 1.10 | 2.1  | 2    |
| Q86VB7 | C163A | Scavenger receptor cysteine_rich type 1 protein M130 | 2 | 2 | 21  | 1.00 | 0.90 | 1.00 |
|        |       | EAEFGQGTGPIWLNEVK                                    |   |   |     | 0.90 | 4.3  | 2    |
|        |       | HNCDHAEDAGVICKS                                      |   |   |     | 1.10 | 4.5  | 3    |
| Q86W56 | PARG  | Poly(ADP-ribose) glycohydrolase                      | 2 | 2 | 2   | 1.28 | 0.89 | 0.34 |
|        |       | DEAKPLRMFHDTIK+Oxidation(7)                          |   |   |     | 1.24 | 2.2  | 2    |
|        |       | FLINPELIISR                                          |   |   |     | 1.36 | 1.8  | 1    |
| Q86Z20 | CC125 | Coiled_coil domain_containing protein 125            | 3 | 8 | 33  | 1.00 | 0.25 | 1.00 |



|        |                                                                            |    |     |      |      |      |      |
|--------|----------------------------------------------------------------------------|----|-----|------|------|------|------|
|        | EEAYVMADAFRIAFAQQLMR+Oxidation(5)                                          |    |     | 1.03 | 2.5  | 2    |      |
|        | NDQALQLTQMDKMHK+Oxidation(12)                                              |    |     | 0.98 | 2.7  | 2    |      |
|        | YLEALAMLDIK                                                                |    |     | 1.00 | 1.8  | 1    |      |
| Q8IW19 | MGAP MAX gene_associated protein                                           | 2  | 2   | 2    | 0.93 | 0.37 | 0.72 |
|        | QSTISPSTSYSLKPHSVPPVSRK                                                    |    |     | 0.92 | 2.2  | 2    |      |
|        | RAFISKVPPGSR                                                               |    |     | 0.98 | 1.8  | 1    |      |
| Q8IWJ2 | GCC2 GRIP and coiled_coil domain_containing protein 2                      | 2  | 5   | 17   | 0.92 | 0.22 | 0.63 |
|        | EDVILKEHITQLEK                                                             |    |     | 0.94 | 2.1  | 2    |      |
|        | RNTDLPLLDMHTVTR+Oxidation(9)                                               |    |     | 0.90 | 2.3  | 2    |      |
| Q8IWL2 | SFTA1 Pulmonary surfactant_associated protein A1                           | 14 | 205 | 2513 | 0.93 | 0.05 | 1.00 |
|        | EQCVEMYTDGQWNR                                                             |    |     | 0.86 | 5.1  | 2    |      |
|        | EQCVEMYTDGQWNR+Oxidation(5)                                                |    |     | 0.86 | 5.0  | 2    |      |
|        | GALSQGSIMTVGEK                                                             |    |     | 0.90 | 4.9  | 2    |      |
|        | GALSQGSIMTVGEK+Oxidation(9)                                                |    |     | 0.96 | 5.2  | 2    |      |
|        | GKEQCVEMYTDGQWNR                                                           |    |     | 0.76 | 5.4  | 2    |      |
|        | GKEQCVEMYTDGQWNR+Oxidation(7)                                              |    |     | 0.91 | 5.2  | 3    |      |
|        | GPPGLPAHLDEELQATLHDFR                                                      |    |     | 0.95 | 4.6  | 3    |      |
|        | HQILQTR                                                                    |    |     | 1.02 | 2.4  | 2    |      |
|        | KYNTYAYVGLTEGSPGDFR                                                        |    |     | 0.92 | 6.2  | 2    |      |
|        | NCLYSR                                                                     |    |     | 0.99 | 2.4  | 2    |      |
|        | NPEENEAIASFVK                                                              |    |     | 1.03 | 4.4  | 2    |      |
|        | VFSSNGQSITFDAIQEACAR                                                       |    |     | 0.91 | 6.0  | 2    |      |
|        | YNTYAYVGLTEGSPGDFR                                                         |    |     | 0.88 | 5.8  | 3    |      |
|        | YSDGTPVNYTNWYR                                                             |    |     | 0.94 | 3.3  | 2    |      |
| Q8N4F0 | BPIL1 Bactericidal/permeability_increasing protein_like 1                  | 3  | 5   | 19   | 0.94 | 0.22 | 0.99 |
|        | AALSYVSEIGK                                                                |    |     | 0.94 | 2.4  | 2    |      |
|        | AGALNLDITGQLR                                                              |    |     | 0.93 | 3.1  | 2    |      |
|        | ALQVTVPHFLDWSGEALQPTR                                                      |    |     | 0.93 | 3.9  | 3    |      |
| Q8N8Z6 | DCBD1 Discoidin_CUB and LCCL domain_containing protein 1                   | 2  | 2   | 3    | 0.95 | 0.73 | 0.98 |
|        | SFVMNFKNNNSKWK                                                             |    |     | 0.95 | 2.2  | 2    |      |
|        | TTGSTQSNFNFYVK                                                             |    |     | 0.95 | 2.2  | 2    |      |
| Q8NB14 | UBP38 Ubiquitin carboxyl_terminal hydrolase 38                             | 3  | 3   | 4    | 1.00 | 0.31 | 0.84 |
|        | FLLDRLHEEEKILK                                                             |    |     | 1.08 | 2.3  | 2    |      |
|        | LILNQSAAWTSQSNSLASCLSR                                                     |    |     | 0.87 | 2.3  | 2    |      |
|        | QVLSLNLNGCNSLMKK+Oxidation(13)                                             |    |     | 1.01 | 2.1  | 2    |      |
| Q8NCQ7 | PRCA1 Protein PROCA1                                                       | 2  | 2   | 3    | 0.90 | 0.56 | 0.76 |
|        | EKDKEEMDEK                                                                 |    |     | 0.82 | 2.2  | 2    |      |
|        | SESPTGKGQGSKVIK                                                            |    |     | 0.96 | 2.2  | 2    |      |
| Q8ND07 | CN045 Uncharacterized protein C14orf45                                     | 2  | 2   | 2    | 0.94 | 0.34 | 0.64 |
|        | ELDDLKENLR                                                                 |    |     | 0.86 | 2.2  | 2    |      |
|        | IQVERELDDLKENLR                                                            |    |     | 1.00 | 2.2  | 2    |      |
| Q8NDA2 | HMCN2 Hemicentin_2                                                         | 2  | 2   | 2    | 1.14 | 0.51 | 0.37 |
|        | ELYVQGGGDCEMSVGAIK+Oxidation(12)                                           |    |     | 1.04 | 2.2  | 2    |      |
|        | GGLEMILAPEGSSSGK                                                           |    |     | 1.19 | 2.2  | 2    |      |
| Q8NET4 | RGAG1 Retrotransposon gag domain_containing protein 1                      | 3  | 2   | 4    | 0.85 | 1.40 | 0.98 |
|        | MLSQPMSTQDPGGMSMSPMK+Oxidation(0),Oxidation(13)                            |    |     | 0.89 | 2.3  | 2    |      |
|        | MLSQPMSTQDPGGMSMSPMK+Oxidation(0),Oxidation(15)                            |    |     | 0.89 | 2.2  | 2    |      |
|        | VMSAQLMAKTSGAMPTGSMK+Oxidation(14),Oxidation(19)                           |    |     | 0.75 | 2.1  | 2    |      |
| Q8NEV4 | MYO3A Myosin_IIIa                                                          | 2  | 2   | 3    | 1.19 | 0.83 | 0.72 |
|        | MSPDTCATILEKAGLDNWALGK                                                     |    |     | 1.47 | 2.2  | 2    |      |
|        | VYQTPKKMNNVYEEVK                                                           |    |     | 1.14 | 2.2  | 2    |      |
| Q8NF91 | SYNE1 Nesprin_1                                                            | 4  | 4   | 4    | 1.01 | 0.25 | 0.99 |
|        | EEVIELMNDTEKK+Oxidation(6)                                                 |    |     | 0.99 | 2.1  | 2    |      |
|        | KEIHDHMEQLK                                                                |    |     | 1.07 | 2.1  | 2    |      |
|        | MLHLVTLYHR+Oxidation(0)                                                    |    |     | 1.02 | 1.9  | 1    |      |
|        | SRLKVLTEVSSSENAQK                                                          |    |     | 0.99 | 2.2  | 2    |      |
| Q8NFJ5 | RAI3 Retinoic acid_induced protein 3                                       | 3  | 6   | 28   | 0.92 | 0.23 | 0.45 |
|        | AHAWSPSYK                                                                  |    |     | 0.97 | 2.2  | 2    |      |
|        | AYSQEEITQGFEEETGDTLYAPYSTHFQLQNQPQK                                        |    |     | 0.95 | 5.0  | 3    |      |
|        | TNVNVFSELSAPR                                                              |    |     | 0.90 | 3.8  | 2    |      |
| Q8TDJ6 | DMXL2 DmX_like protein 2                                                   | 2  | 2   | 3    | 0.89 | 1.42 | 0.98 |
|        | QEVLQETFIR                                                                 |    |     | 0.94 | 1.8  | 1    |      |
|        | QSENISAPPVLSIEDIDKHRR                                                      |    |     | 0.78 | 2.1  | 2    |      |
| Q8TDL5 | LPLC1 Long palate_lung and nasal epithelium carcinoma_associated protein 1 | 17 | 45  | 330  | 0.93 | 0.08 | 1.00 |
|        | ALGFEEAESSLTK                                                              |    |     | 0.98 | 3.9  | 2    |      |

|        |                                                      |   |   |    |      |      |      |
|--------|------------------------------------------------------|---|---|----|------|------|------|
|        | DALVLTASLWKPSSPVSQ                                   |   |   |    | 0.95 | 4.3  | 2    |
|        | EKPAGGIPVLGSLVNTVLK                                  |   |   |    | 0.91 | 4.6  | 3    |
|        | GDQLILNLNLISSDR                                      |   |   |    | 0.91 | 4.1  | 2    |
|        | GDTIQLYLGAK                                          |   |   |    | 0.79 | 2.8  | 2    |
|        | ILTQDTPEFFIDQGHAK                                    |   |   |    | 0.87 | 3.5  | 2    |
|        | IQLMNSGIGWFQPDVLK                                    |   |   |    | 0.96 | 4.8  | 2    |
|        | IQLMNSGIGWFQPDVLK+Oxidation(3)                       |   |   |    | 0.92 | 4.9  | 2    |
|        | LEFDLLYPAIK                                          |   |   |    | 0.89 | 3.4  | 2    |
|        | LSFLVNALAK                                           |   |   |    | 0.90 | 3.1  | 2    |
|        | LVLSDCATSHGSLR                                       |   |   |    | 0.96 | 3.6  | 2    |
|        | MDTSASGPTR+Oxidation(0)                              |   |   |    | 0.83 | 2.6  | 2    |
|        | NIITEIHSILLPNQNGK                                    |   |   |    | 0.94 | 5.3  | 2    |
|        | QVMNLLVPSLPNLVK                                      |   |   |    | 0.87 | 3.7  | 2    |
|        | QVMNLLVPSLPNLVK+Oxidation(2)                         |   |   |    | 0.89 | 3.4  | 2    |
|        | SSIGLINEK                                            |   |   |    | 0.91 | 2.6  | 2    |
|        | VITANILQLQVKPSANDQELLVK                              |   |   |    | 1.02 | 3.6  | 3    |
| Q8TEU7 | RPGF6 Rap guanine nucleotide exchange factor 6       | 2 | 2 | 3  | 1.01 | 0.29 | 0.96 |
|        | DNEDSILQREIPAR                                       |   |   |    | 0.99 | 2.3  | 2    |
|        | SSLLNAKKLYEDAQMAR+Oxidation(14)                      |   |   |    | 1.03 | 2.2  | 2    |
| Q8WUM4 | PDC6l Programmed cell death 6_interacting protein    | 2 | 2 | 11 | 0.97 | 0.49 | 1.00 |
|        | LLDEEEATDNDLR                                        |   |   |    | 0.91 | 3.2  | 2    |
|        | SVIEQGGIQTVDQLIK                                     |   |   |    | 1.00 | 3.3  | 2    |
| Q8WZ42 | TITIN Titin                                          | 5 | 6 | 42 | 1.13 | 0.35 | 0.89 |
|        | EEGEFTDKVQIEK                                        |   |   |    | 1.00 | 2.2  | 2    |
|        | EGVKITEKPSPEK                                        |   |   |    | 0.95 | 2.6  | 2    |
|        | ELEETAARMEIK+Oxidation(8)                            |   |   |    | 4.93 | 2.2  | 2    |
|        | GSPVIQVTWFKNNK                                       |   |   |    | 0.89 | 2.2  | 2    |
|        | GVQWIKNGVVLESNEK                                     |   |   |    | 0.95 | 2.1  | 2    |
| Q92539 | LPIN2 Phosphatidate phosphatase LPIN2                | 2 | 3 | 3  | 1.03 | 0.28 | 0.45 |
|        | ATVESWVKDKMPK                                        |   |   |    | 1.16 | 2.1  | 2    |
|        | IFTVNPKGELIQR                                        |   |   |    | 0.95 | 2.1  | 2    |
| Q92576 | PHF3 PHD finger protein 3                            | 2 | 2 | 2  | 1.19 | 0.74 | 0.47 |
|        | TGETVVEEMIATR+Oxidation(8)                           |   |   |    | 1.07 | 2.1  | 2    |
|        | TKYIDDTVK                                            |   |   |    | 1.36 | 1.9  | 1    |
| Q92786 | PROX1 Prospero homeobox protein 1                    | 2 | 2 | 2  | 0.95 | 0.26 | 0.75 |
|        | EFYIQMEKYAR                                          |   |   |    | 0.91 | 2.2  | 2    |
|        | VENIIRGMSHSPSVALR                                    |   |   |    | 0.97 | 2.2  | 2    |
| Q96A65 | EXOC4 Exocyst complex component 4                    | 2 | 2 | 2  | 0.84 | 0.47 | 0.40 |
|        | QVPQKLEQCMASK                                        |   |   |    | 0.82 | 2.5  | 2    |
|        | STVSKSKDPSGLLISVIR                                   |   |   |    | 0.85 | 2.3  | 2    |
| Q96BR6 | ZN669 Zinc finger protein 669                        | 3 | 2 | 16 | 0.96 | 0.47 | 1.00 |
|        | QCGKAFSRLSSLNHR                                      |   |   |    | 0.93 | 2.4  | 2    |
|        | RHMIMHSGNPAYKCTICGK+Oxidation(2)                     |   |   |    | 0.99 | 2.6  | 2    |
|        | RHMIMHSGNPAYKCTICGK+Oxidation(4)                     |   |   |    | 0.99 | 2.6  | 2    |
| Q96DA0 | ZG16B Zymogen granule protein 16 homolog B           | 2 | 3 | 27 | 0.94 | 0.29 | 0.99 |
|        | LGALGGNTQEVTLQPGEYITK                                |   |   |    | 0.96 | 5.3  | 2    |
|        | VSVGLLLVK                                            |   |   |    | 0.88 | 2.9  | 2    |
| Q96FN5 | KIF12 Kinesin_like protein KIF12                     | 2 | 2 | 2  | 0.98 | 0.33 | 0.69 |
|        | MEERGSPPDGLAR+Oxidation(0)                           |   |   |    | 1.07 | 2.1  | 2    |
|        | QTAQQMPSVDPGEPVGGK                                   |   |   |    | 0.94 | 2.2  | 2    |
| Q96G01 | BICD1 Protein bicaudal D homolog 1                   | 2 | 5 | 47 | 1.05 | 0.33 | 1.00 |
|        | EETLLQESASK                                          |   |   |    | 1.00 | 2.1  | 1    |
|        | MKDEIREYK+Oxidation(0)                               |   |   |    | 1.10 | 2.2  | 1    |
| Q96JB5 | CK5P3 CDK5 regulatory subunit_associated protein 3   | 2 | 2 | 3  | 0.94 | 0.60 | 0.91 |
|        | LTSLQLQHLMILASPR+Oxidation(10)                       |   |   |    | 0.99 | 2.2  | 2    |
|        | MEDHQHVPIDIQTSKLLDWLVDRR                             |   |   |    | 0.91 | 2.1  | 2    |
| Q96KP4 | CNDP2 Cytosolic non_specific dipeptidase             | 3 | 4 | 16 | 1.03 | 0.28 | 0.93 |
|        | EGGSIPVTLTFQEATGK                                    |   |   |    | 0.97 | 3.2  | 2    |
|        | TVFGVEPDLTR                                          |   |   |    | 1.00 | 2.6  | 2    |
|        | WVAIQSVSAWPEK                                        |   |   |    | 1.31 | 2.1  | 2    |
| Q96M86 | DNHD1 Dynein heavy chain domain_containing protein 1 | 2 | 2 | 3  | 0.94 | 0.37 | 0.89 |
|        | NEQEKEQEENEEK                                        |   |   |    | 0.64 | 2.2  | 2    |
|        | QILEDTIRTLNVTK                                       |   |   |    | 0.96 | 2.2  | 2    |
| Q96PD5 | PGRP2 N_acetylmuramoyl_L_alanine amidase             | 4 | 8 | 35 | 0.94 | 0.27 | 0.98 |
|        | AGLLRPDYALLGHR                                       |   |   |    | 1.02 | 4.0  | 3    |
|        | GCPDVQASLPDAK                                        |   |   |    | 1.04 | 2.5  | 2    |
|        | GSQTQSHPDLTGTEGCWDQLSAPR                             |   |   |    | 0.86 | 4.5  | 3    |

|        |                                                                |    |    |    |      |      |      |  |
|--------|----------------------------------------------------------------|----|----|----|------|------|------|--|
|        | TDCPGDALFDLLR                                                  |    |    |    | 0.85 | 3.6  | 2    |  |
| Q96QR1 | SG3A1 Secretoglobin family 3A member 1                         | 2  | 5  | 8  | 0.90 | 0.33 | 0.43 |  |
|        | CVAELGPQAVGAVK                                                 |    |    |    | 1.13 | 2.8  | 2    |  |
|        | LLSSLGIPVNHLEGSQK                                              |    |    |    | 0.82 | 3.5  | 3    |  |
| Q96S96 | PEBP4 Phosphatidylethanolamine_binding protein 4               | 5  | 11 | 45 | 0.93 | 0.23 | 1.00 |  |
|        | FHLGEPEASTQFMTQNYQDSPTLQAPR                                    |    |    |    | 0.93 | 5.4  | 3    |  |
|        | FHLGEPEASTQFMTQNYQDSPTLQAPR+Oxidation(12)                      |    |    |    | 0.85 | 4.1  | 3    |  |
|        | HWLVTDIK                                                       |    |    |    | 0.93 | 2.8  | 2    |  |
|        | IQQQELSAYQAPSPPAHSGFHR                                         |    |    |    | 0.93 | 3.7  | 3    |  |
|        | ITSWMEPIVK+Oxidation(4)                                        |    |    |    | 0.96 | 2.4  | 2    |  |
| Q96SN8 | CK5P2 CDK5 regulatory subunit_associated protein 2             | 2  | 2  | 7  | 0.95 | 0.78 | 0.97 |  |
|        | FQVEHFSQEELK                                                   |    |    |    | 1.01 | 2.4  | 2    |  |
|        | KMHEGDLAMALVLDEK                                               |    |    |    | 0.84 | 2.6  | 2    |  |
| Q96T17 | MA7D2 MAP7 domain_containing protein 2                         | 3  | 4  | 30 | 1.05 | 0.25 | 0.83 |  |
|        | AYPQSPKTTKPPYPGSPVK                                            |    |    |    | 0.98 | 2.8  | 2    |  |
|        | EQEEQERLEK                                                     |    |    |    | 1.31 | 2.2  | 2    |  |
|        | KEDPKVGVQPAVCVEK                                               |    |    |    | 1.08 | 2.1  | 2    |  |
| Q99459 | CDC5L Cell division cycle 5_like protein                       | 2  | 2  | 2  | 0.95 | 0.89 | 0.95 |  |
|        | MKILLGGYQSRAMGLMK+Oxidation(12),Oxidation(15)                  |    |    |    | 1.01 | 2.1  | 2    |  |
|        | TIAPIIGRTAAQCLEHYEFLLDK                                        |    |    |    | 0.76 | 2.2  | 2    |  |
| Q99497 | PARK7 Protein DJ_1                                             | 2  | 6  | 18 | 0.98 | 0.24 | 0.96 |  |
|        | DVVICPDASLEDKAK                                                |    |    |    | 1.08 | 2.4  | 2    |  |
|        | EGPYDVVVLPGGNLGAQNLSESAVK                                      |    |    |    | 0.95 | 4.0  | 3    |  |
| Q99715 | COCA1 Collagen alpha-1(XII) chain                              | 2  | 4  | 16 | 1.02 | 0.44 | 0.87 |  |
|        | EVEVDRSETSTSLK                                                 |    |    |    | 0.93 | 2.5  | 2    |  |
|        | MLEAYNLTEK+Oxidation(0)                                        |    |    |    | 1.12 | 2.5  | 2    |  |
| Q99996 | AKAP9 A_kinase anchor protein 9                                | 2  | 2  | 5  | 0.83 | 0.91 | 0.84 |  |
|        | FLDEQAIDREHER                                                  |    |    |    | 0.83 | 2.1  | 2    |  |
|        | LSKIWGQQTDGMK                                                  |    |    |    | 0.83 | 1.8  | 1    |  |
| Q9BVJ6 | UT14A U3 small nucleolar RNA_associated protein 14 homolog A   | 2  | 2  | 4  | 0.94 | 0.32 | 0.82 |  |
|        | QAMQEQLSKNKELTQK                                               |    |    |    | 0.93 | 2.2  | 2    |  |
|        | VNPAAALEELEKIEK                                                |    |    |    | 0.96 | 2.1  | 2    |  |
| Q9BW30 | TPPP3 Tubulin polymerization_promoting protein family member 3 | 3  | 7  | 71 | 0.92 | 0.20 | 0.80 |  |
|        | QDILDDSGYVSAYK                                                 |    |    |    | 0.90 | 4.0  | 2    |  |
|        | SKEEAFDAICQLVAGK                                               |    |    |    | 0.94 | 4.1  | 3    |  |
|        | SVTGTDDVIVFSK                                                  |    |    |    | 0.98 | 3.4  | 2    |  |
| Q9BZR6 | RTN4R Reticulon_4 receptor                                     | 2  | 3  | 5  | 0.92 | 0.32 | 0.80 |  |
|        | CCQPDAADK                                                      |    |    |    | 0.82 | 1.9  | 1    |  |
|        | LAGRDLK                                                        |    |    |    | 0.95 | 1.8  | 1    |  |
| Q9H116 | GZF1 GDNF_inducible zinc finger protein 1                      | 2  | 3  | 4  | 1.01 | 0.35 | 0.99 |  |
|        | CLDLSETCFQLK                                                   |    |    |    | 1.00 | 2.3  | 2    |  |
|        | NEGCQAGAELEELSKK                                               |    |    |    | 1.02 | 2.2  | 2    |  |
| Q9H299 | SH3L3 SH3 domain_binding glutamic acid_rich_like protein 3     | 2  | 3  | 17 | 0.92 | 0.48 | 0.98 |  |
|        | IYQLVDISQDNALR                                                 |    |    |    | 0.95 | 3.7  | 2    |  |
|        | VYSTSVTGSR                                                     |    |    |    | 0.88 | 2.7  | 2    |  |
| Q9H2C1 | LHX5 LIM/homeobox protein Lhx5                                 | 2  | 2  | 5  | 1.11 | 0.40 | 0.46 |  |
|        | CFSREGKLYCK                                                    |    |    |    | 1.11 | 1.8  | 1    |  |
|        | ETANNENEEQNSGTRK                                               |    |    |    | 1.10 | 2.3  | 2    |  |
| Q9H582 | ZN644 Zinc finger protein 644                                  | 2  | 2  | 3  | 1.02 | 0.79 | 1.00 |  |
|        | KESSVGGEDLDSYPDFLHK                                            |    |    |    | 0.99 | 2.2  | 2    |  |
|        | YENYRMIKK+Oxidation(5)                                         |    |    |    | 1.06 | 1.8  | 1    |  |
| Q9H8X2 | IPPK Inositol_pentakisphosphate 2_kinase                       | 2  | 3  | 4  | 0.94 | 0.34 | 0.92 |  |
|        | YCMHQHLK+Oxidation(2)                                          |    |    |    | 0.90 | 1.8  | 1    |  |
|        | YLEEFPEER                                                      |    |    |    | 0.95 | 2.3  | 2    |  |
| Q9HC84 | MUC5B Mucin_5B                                                 | 13 | 21 | 94 | 0.96 | 0.16 | 1.00 |  |
|        | AAGGAVCEQPLGLECR                                               |    |    |    | 1.03 | 4.4  | 2    |  |
|        | ELGQVVECSLDFGLVCR                                              |    |    |    | 0.91 | 4.1  | 2    |  |
|        | GATGGLCDLTCPPTK                                                |    |    |    | 1.16 | 3.1  | 2    |  |
|        | GYQVCPVLADIECR                                                 |    |    |    | 0.93 | 3.6  | 2    |  |
|        | IRAAGGHLCCQPK                                                  |    |    |    | 0.90 | 2.1  | 2    |  |
|        | IVTENIPCGTTGTTCSK                                              |    |    |    | 0.95 | 3.1  | 2    |  |
|        | LEVPCQSLEAYAELCR                                               |    |    |    | 0.86 | 2.9  | 2    |  |
|        | LTPLQFGNLQK                                                    |    |    |    | 1.13 | 2.6  | 2    |  |
|        | NSFEDPCSLSVENENYAR                                             |    |    |    | 0.90 | 4.9  | 2    |  |

|        |                                                       |    |    |      |      |      |      |
|--------|-------------------------------------------------------|----|----|------|------|------|------|
|        | SEQLGGDVESYDK                                         |    |    | 0.88 | 3.5  | 2    |      |
|        | SVVGDALEFGNSWK                                        |    |    | 0.86 | 2.6  | 2    |      |
|        | TGLLVEQSGDYIK                                         |    |    | 1.00 | 2.8  | 2    |      |
|        | TLLGPAFAECHALVDSTAYLAACAQDLCR                         |    |    | 0.96 | 3.4  | 3    |      |
| Q9HCJ0 | TNR6C Trinucleotide repeat_containing gene 6C protein | 2  | 3  | 6    | 1.06 | 0.38 | 0.91 |
|        | STWSSGPTSHTQASLSHELWK                                 |    |    | 1.11 | 2.1  | 2    |      |
|        | TSSWLVLRL                                             |    |    | 1.04 | 2.2  | 2    |      |
| Q9NQ79 | CRAC1 Cartilage acidic protein 1                      | 12 | 19 | 109  | 0.98 | 0.14 | 1.00 |
|        | DEASSVEVTWPDGK                                        |    |    | 1.30 | 3.3  | 2    |      |
|        | DKPVCVNTYGSYR                                         |    |    | 1.09 | 2.4  | 2    |      |
|        | DVAEEAGVSK                                            |    |    | 0.96 | 3.1  | 2    |      |
|        | EHGDPLIEELNPGDALEPEGR                                 |    |    | 0.99 | 3.5  | 2    |      |
|        | GDGTFVDAASAGVDDPHQHGR                                 |    |    | 0.94 | 4.1  | 4    |      |
|        | GVALADFNR                                             |    |    | 1.04 | 2.6  | 2    |      |
|        | GVASLFAGR                                             |    |    | 1.01 | 2.5  | 2    |      |
|        | GVSVPILSSASDIFCDNENGNFLFHNR                           |    |    | 0.89 | 4.1  | 3    |      |
|        | IIDGGSGYLCEMEPVAFHGLGK                                |    |    | 0.91 | 3.4  | 3    |      |
|        | LVNIAVDER                                             |    |    | 0.88 | 2.2  | 2    |      |
|        | QGNAIGVTACDIDGDGR                                     |    |    | 1.19 | 2.9  | 2    |      |
|        | WEDILSDEVNVAR                                         |    |    | 0.96 | 4.7  | 2    |      |
| Q9NVP1 | DDX18 ATP_dependent RNA helicase DDX18                | 2  | 2  | 2    | 1.05 | 0.70 | 0.90 |
|        | KLMVFFSSCMSVK+Oxidation(2),Oxidation(9)               |    |    | 0.99 | 2.4  | 2    |      |
|        | QKPMNVGLSETQNGGMSQEAVGNIVTK                           |    |    | 1.13 | 2.2  | 2    |      |
| Q9NY65 | TBA8 Tubulin alpha_8 chain                            | 7  | 13 | 76   | 0.98 | 0.18 | 1.00 |
|        | AVCMLSNTTAAIEAWAR                                     |    |    | 1.00 | 4.2  | 2    |      |
|        | AVMIDLEPTVVDEVR+Oxidation(2)                          |    |    | 0.95 | 2.3  | 2    |      |
|        | LISQIVSSITASLR                                        |    |    | 0.92 | 3.6  | 2    |      |
|        | NLDIERPTYTNLNR                                        |    |    | 1.15 | 2.6  | 2    |      |
|        | QLFHPEQLITGK                                          |    |    | 0.97 | 2.4  | 2    |      |
|        | TIQFVDWCPTGFK                                         |    |    | 0.94 | 3.2  | 2    |      |
|        | VGINYQPPTVVPGGDLAK                                    |    |    | 0.93 | 4.3  | 2    |      |
| Q9NYQ6 | CELRL1 Cadherin EGF LAG seven_pass G_type receptor 1  | 4  | 4  | 8    | 0.96 | 0.48 | 0.99 |
|        | CDNPFAEVTTLGCEVIYNGCPK                                |    |    | 0.84 | 2.1  | 2    |      |
|        | DANSVITYQLTGGNTR                                      |    |    | 1.09 | 2.3  | 2    |      |
|        | LASSQPPEQRKGILK                                       |    |    | 0.93 | 2.4  | 2    |      |
|        | QFVGCMRNLSVDGK                                        |    |    | 0.98 | 2.2  | 2    |      |
| Q9NZL9 | MAT2B Methionine adenosyltransferase 2 subunit beta   | 2  | 5  | 39   | 1.00 | 0.21 | 0.93 |
|        | LDGEKAVLENNLGAAVLR                                    |    |    | 0.97 | 2.7  | 2    |      |
|        | SANMDHWQQRFPTHVK                                      |    |    | 1.07 | 2.2  | 2    |      |
| Q9P121 | NTRI Neurotrimin                                      | 3  | 3  | 5    | 0.96 | 0.36 | 0.57 |
|        | EQSGDYECASNDVAAPVVR                                   |    |    | 0.70 | 4.8  | 2    |      |
|        | GTLQCEASAVPSAEFQWYK                                   |    |    | 1.03 | 2.4  | 2    |      |
|        | VTVNYPPYISEAK                                         |    |    | 1.04 | 2.5  | 2    |      |
| Q9UEW3 | MARCO Macrophage receptor MARCO                       | 3  | 4  | 7    | 1.02 | 0.53 | 0.85 |
|        | GTESTLWSCTK                                           |    |    | 1.25 | 2.6  | 2    |      |
|        | LQVLQAQLTWVVR                                         |    |    | 0.90 | 3.4  | 2    |      |
|        | VGAGTGQIWLNDNVQCR                                     |    |    | 0.92 | 3.2  | 2    |      |
| Q9UGL1 | KDM5B Lysine_specific demethylase 5B                  | 2  | 4  | 17   | 0.95 | 0.23 | 1.00 |
|        | EFGSGFPVRDGGKIK                                       |    |    | 0.93 | 2.5  | 2    |      |
|        | EIEEIPAYLPNGAALK                                      |    |    | 1.00 | 2.2  | 2    |      |
| Q9UGM3 | DMBT1 Deleted in malignant brain tumors 1 protein     | 9  | 20 | 134  | 0.98 | 0.15 | 1.00 |
|        | DDTYGPPYSSPSLR                                        |    |    | 1.10 | 2.4  | 2    |      |
|        | FGQSGSPIVLDDVR                                        |    |    | 0.98 | 4.3  | 2    |      |
|        | GRVEVLYR                                              |    |    | 0.99 | 2.6  | 2    |      |
|        | GSWGTVCDDSWDTNDANVCCR                                 |    |    | 0.91 | 5.4  | 2    |      |
|        | GSWGTVCDDSWDTSDANVCCR                                 |    |    | 0.94 | 5.4  | 2    |      |
|        | GSWGTVCDDYWDTNDANVCCR                                 |    |    | 0.91 | 4.8  | 2    |      |
|        | INLGFSLNK                                             |    |    | 0.99 | 2.3  | 2    |      |
|        | QLGCGWATSAPGNAR                                       |    |    | 1.01 | 3.3  | 2    |      |
|        | VDVVLGPIQLQTPPR                                       |    |    | 0.97 | 3.5  | 2    |      |
| Q9UGT4 | SUSD2 Sushi domain_containing protein 2               | 5  | 11 | 58   | 0.96 | 0.16 | 1.00 |
|        | DSIQTLGHVDSSGQVHCVSPLLYESGR                           |    |    | 0.94 | 5.1  | 3    |      |
|        | DVQALWTNDHALAWHLSDDFR                                 |    |    | 0.95 | 3.3  | 3    |      |
|        | GHDWGAPPFR                                            |    |    | 1.06 | 2.5  | 2    |      |
|        | GTGLTAVAVQEGNSDVVEVR                                  |    |    | 0.93 | 5.1  | 2    |      |
|        | HDPTFEPLFPSETTLNPSLAQEAAK                             |    |    | 0.95 | 5.6  | 3    |      |

|        |       |                                                       |   |   |      |      |      |      |
|--------|-------|-------------------------------------------------------|---|---|------|------|------|------|
| Q9UHK6 | AMACR | Alpha_methylacyl_CoA racemase                         | 2 | 5 | 88   | 0.98 | 0.28 | 0.99 |
|        |       | GKRSLVLDLK                                            |   |   | 0.96 | 3.6  | 3    |      |
|        |       | SDELPNQMSMDDWPEMK+Oxidation(9)                        |   |   | 0.99 | 2.1  | 2    |      |
| Q9UIF8 | BAZ2B | Bromodomain adjacent to zinc finger domain protein 2B | 4 | 5 | 23   | 0.97 | 0.49 | 0.75 |
|        |       | ETYMKLIVPSPDVLKAGNK+Oxidation(3)                      |   |   | 0.73 | 3.2  | 2    |      |
|        |       | NTSEESLLTSELR                                         |   |   | 0.63 | 2.2  | 2    |      |
|        |       | SIAWEKSIMK+Oxidation(8)                               |   |   | 1.03 | 2.5  | 2    |      |
|        |       | STSSGGGNRKCNCQEQSK                                    |   |   | 1.17 | 2.3  | 2    |      |
| Q9UPV0 | CE164 | Centrosomal protein of 164 kDa                        | 2 | 7 | 10   | 1.06 | 0.33 | 0.91 |
|        |       | LQDLELDLETRAKDVK                                      |   |   | 0.88 | 2.1  | 2    |      |
|        |       | QAQQPLGIEDK                                           |   |   | 1.10 | 2.5  | 2    |      |
| Q9UQ35 | SRRM2 | Serine/arginine repetitive matrix protein 2           | 2 | 2 | 4    | 1.06 | 0.55 | 0.71 |
|        |       | QDRGEFSASPMLK+Oxidation(10)                           |   |   | 1.11 | 2.3  | 2    |      |
|        |       | SSTPPGESYFGVSSLQLK                                    |   |   | 0.70 | 2.4  | 2    |      |
| Q9Y2K3 | MYH15 | Myosin_15                                             | 2 | 2 | 3    | 0.92 | 0.48 | 0.84 |
|        |       | LQEAAEAMGVANARNASLER+Oxidation(7)                     |   |   | 0.93 | 2.1  | 2    |      |
|        |       | TRENMEQTITDLQK                                        |   |   | 0.92 | 2.2  | 2    |      |
| Q9Y5S2 | MRCKB | Serine/threonine_protein kinase MRCK beta             | 2 | 2 | 4    | 0.92 | 0.83 | 0.66 |
|        |       | ELLEEMEILK+Oxidation(5)                               |   |   | 0.74 | 2.0  | 1    |      |
|        |       | SQAKELKDAHQQR                                         |   |   | 1.16 | 1.8  | 1    |      |
| Q9Y6Q2 | STON1 | Stonin_1                                              | 2 | 2 | 4    | 1.08 | 0.49 | 0.79 |
|        |       | FELMRFK                                               |   |   | 1.01 | 2.0  | 1    |      |
|        |       | WVTFDDDDPAVQSSQK                                      |   |   | 1.18 | 2.1  | 2    |      |
| Q9Y6R7 | FCGBP | IgGfc_binding protein                                 | 3 | 6 | 32   | 0.95 | 0.27 | 0.88 |
|        |       | VNGVLTALPVSADGR                                       |   |   | 1.07 | 3.9  | 2    |      |
|        |       | VTLQPYNVAQLQSSVDLSGSK                                 |   |   | 0.89 | 4.2  | 2    |      |
|        |       | VVAEVQICHGK                                           |   |   | 0.85 | 2.2  | 2    |      |

## Supplemental Table II

Relative expression ratio in the COPD patients vs. healthy controls dataset

| Accession Number | Gene Name | Protein Name                                  | No. of quantified peptides | Frames | Hits | Ratio        | StDev        | p value       |
|------------------|-----------|-----------------------------------------------|----------------------------|--------|------|--------------|--------------|---------------|
| A0M8Q6           | LAC7      | Ig lambda_7 chain C region                    | 3                          | 31     | 310  | 0.91         | 0.16         | 0.75          |
|                  |           | <b>Peptide</b>                                |                            |        |      | <b>Ratio</b> | <b>Xcorr</b> | <b>Charge</b> |
|                  |           | VTHEGSTVEK                                    |                            |        |      | 0.47         | 2.6          | 1             |
|                  |           | AAPSVTLFPPSSEELQANK                           |                            |        |      | 0.91         | 4.6          | 2             |
|                  |           | YAASSYLSLTPEQWK                               |                            |        |      | 0.94         | 5.8          | 2             |
| A4UGR9           | XIRP2     | Xin actin_binding repeat_containing protein 2 | 2                          | 2      | 2    | 0.80         | 0.39         | 0.37          |
|                  |           | GEGLEYENIK                                    |                            |        |      | 0.17         | 1.9          | 1             |
|                  |           | SEQEAIHSSQVGTSRSSQEMARNEQEGSK                 |                            |        |      | 0.81         | 3.5          | 3             |
| A5A3E0           | POTEF     | POTE ankyrin domain family member F           | 2                          | 8      | 93   | 0.93         | 0.35         | 0.31          |
|                  |           | MVVEVDSMPAASSVK+Oxidation(7)                  |                            |        |      | 0.60         | 2.3          | 2             |
|                  |           | SYELPDGQVITIGNER                              |                            |        |      | 0.93         | 5.0          | 2             |
| A6NMY6           | AXA2L     | Putative annexin A2_like protein              | 12                         | 19     | 100  | 0.93         | 0.27         | 0.23          |
|                  |           | TNQELQEINR                                    |                            |        |      | 1.17         | 3.6          | 2             |
|                  |           | AYTNFDAER                                     |                            |        |      | 1.11         | 2.4          | 2             |
|                  |           | LSLEGDHSTPPSAYGSVK                            |                            |        |      | 0.83         | 4.5          | 2             |
|                  |           | WISIMTER+Oxidation(4)                         |                            |        |      | 1.21         | 2.5          | 2             |
|                  |           | TDLEKDIISDTSGDFRK                             |                            |        |      | 1.07         | 5.0          | 3             |
|                  |           | DIISDTSGDFR                                   |                            |        |      | 2.18         | 3.1          | 2             |
|                  |           | DALNIETAIK                                    |                            |        |      | 0.78         | 3.4          | 2             |
|                  |           | WISIMTER                                      |                            |        |      | 1.74         | 2.5          | 2             |
|                  |           | TDLEKDIISDTSGDFR                              |                            |        |      | 1.10         | 3.1          | 2             |
|                  |           | SALSGHLETVILGLLK                              |                            |        |      | 0.81         | 4.6          | 2             |
|                  |           | SLYYYIQDQTK                                   |                            |        |      | 1.04         | 2.9          | 2             |
|                  |           | TPAQYDASELK                                   |                            |        |      | 1.26         | 3.4          | 2             |
| O00151           | PDL1      | PDZ and LIM domain protein 1                  | 2                          | 2      | 2    | 1.33         | 0.61         | 0.38          |
|                  |           | VTPPEGYEVTVFVK                                |                            |        |      | 0.92         | 2.8          | 2             |
|                  |           | HRHPECYVCTDCGTNLK                             |                            |        |      | 1.56         | 4.8          | 3             |
| O00299           | CLIC1     | Chloride intracellular channel protein 1      | 6                          | 11     | 43   | 1.05         | 0.53         | 0.93          |
|                  |           | NSNPALNDNLEK                                  |                            |        |      | 0.69         | 3.0          | 2             |
|                  |           | VLDNYLTSPLPEEVDETSAEDEGVSR                    |                            |        |      | 1.32         | 5.0          | 3             |
|                  |           | LAALNPESNTAGLDIFAK                            |                            |        |      | 1.05         | 4.6          | 2             |
|                  |           | FLDGNELTLADCNLLPK                             |                            |        |      | 1.29         | 3.3          | 2             |
|                  |           | GVTFNVTVDTK                                   |                            |        |      | 1.73         | 3.7          | 2             |
|                  |           | IGNCPFSQR                                     |                            |        |      | 0.62         | 2.3          | 2             |
| O00391           | QSOX1     | Sulfhydryl oxidase 1                          | 5                          | 10     | 34   | 0.87         | 0.37         | 0.70          |
|                  |           | VLNTEANVVR                                    |                            |        |      | 0.69         | 3.2          | 2             |
|                  |           | AHFSPSNIILDFPAAGSAAR                          |                            |        |      | 0.87         | 4.9          | 3             |
|                  |           | DCASHFEQMAAASMHR                              |                            |        |      | 0.64         | 4.2          | 3             |
|                  |           | NGSGAVFPVAGADVQTLR                            |                            |        |      | 0.56         | 3.2          | 2             |
|                  |           | SALYSPSDPLTLLQADTVR                           |                            |        |      | 0.61         | 3.8          | 2             |
| O00560           | SDCB1     | Syntenin_1                                    | 4                          | 4      | 4    | 0.66         | 0.39         | 0.02          |
|                  |           | DSTGHVGFIFK                                   |                            |        |      | 0.48         | 2.5          | 2             |
|                  |           | FGDQVLQINGENCAGWSSDK                          |                            |        |      | 0.49         | 4.9          | 2             |
|                  |           | NGLLTEHNICEINGQNVIGLK                         |                            |        |      | 0.68         | 3.5          | 3             |
|                  |           | VIQAQTAFSANPANPAILSEASAPIPHDGNLYPR            |                            |        |      | 0.65         | 4.1          | 3             |

|        |       |                                                    |    |    |    |      |      |      |
|--------|-------|----------------------------------------------------|----|----|----|------|------|------|
| O00757 | F16P2 | Fructose_1_6_bisphosphatase isozyme 2              | 4  | 5  | 8  | 1.15 | 0.81 | 0.17 |
|        |       | YVGSMDVADVHR                                       |    |    |    | 0.80 | 2.6  | 2    |
|        |       | IYSLNEGYAK                                         |    |    |    | 2.71 | 2.7  | 2    |
|        |       | YVGSMDVADVHR+Oxidation(4)                          |    |    |    | 3.81 | 2.6  | 2    |
|        |       | TLVYGGIFLYPANQK                                    |    |    |    | 2.56 | 2.5  | 2    |
| O14745 | NHRF1 | Na(+)/H(+) exchange regulatory cofactor NHE_RF1    | 3  | 3  | 5  | 1.09 | 1.34 | 0.96 |
|        |       | KGPSGYGFNLHSDK                                     |    |    |    | 1.11 | 4.1  | 3    |
|        |       | LVEVNGENVEK                                        |    |    |    | 0.71 | 2.5  | 2    |
|        |       | LLVDPETDEQLQK                                      |    |    |    | 0.75 | 2.6  | 2    |
| O15050 | TRNK1 | TPR and ankyrin repeat_containing protein 1        | 3  | 4  | 11 | 1.01 | 0.36 | 0.80 |
|        |       | SLMVNPEMYKLLNGELK+Oxidation(2),Oxidation(7)        |    |    |    | 1.01 | 2.5  | 2    |
|        |       | FDINFNLKNKEGK                                      |    |    |    | 1.50 | 2.5  | 2    |
|        |       | YLSANKMK+Oxidation(6)                              |    |    |    | 0.98 | 1.9  | 1    |
| O15085 | ARHGB | Rho guanine nucleotide exchange factor 11          | 2  | 2  | 3  | 1.45 | 2.09 | 0.70 |
|        |       | IPEMLQAEIDSR                                       |    |    |    | 1.45 | 2.4  | 2    |
|        |       | TRNSGIWESPELDR                                     |    |    |    | 1.23 | 2.4  | 2    |
| O15143 | ARC1B | Actin_related protein 2/3 complex subunit 1B       | 3  | 3  | 3  | 2.21 | 5.18 | 0.45 |
|        |       | NSVSQISVLSGGK                                      |    |    |    | 2.10 | 2.9  | 2    |
|        |       | ASSEGTAAGAGLDSLHK                                  |    |    |    | 2.78 | 3.7  | 2    |
|        |       | EVEERPAPTPWGSK                                     |    |    |    | 3.36 | 3.3  | 2    |
| O15511 | ARPC5 | Actin_related protein 2/3 complex subunit 5        | 2  | 2  | 8  | 1.77 | 1.61 | 0.36 |
|        |       | ALAAGGVGSIVR                                       |    |    |    | 1.32 | 3.5  | 2    |
|        |       | QGNMTAALQAALK                                      |    |    |    | 1.79 | 2.8  | 2    |
| O43707 | ACTN4 | Alpha_actinin_4                                    | 11 | 13 | 20 | 1.72 | 0.66 | 0.20 |
|        |       | ASIHEAWTDGK                                        |    |    |    | 2.65 | 2.4  | 2    |
|        |       | GISQEQMQEFR                                        |    |    |    | 0.61 | 2.5  | 2    |
|        |       | QFASQANVVGPIQTK                                    |    |    |    | 1.62 | 3.7  | 2    |
|        |       | ACLISLGYDVENDR                                     |    |    |    | 1.73 | 3.6  | 2    |
|        |       | VGWEQLLTIAR                                        |    |    |    | 1.00 | 2.4  | 2    |
|        |       | HTNYTMEHIR                                         |    |    |    | 2.55 | 3.9  | 3    |
|        |       | TINEVENQILTR                                       |    |    |    | 2.79 | 3.2  | 2    |
|        |       | KHEAFESDLAAHQDR                                    |    |    |    | 1.65 | 4.4  | 2    |
|        |       | HEAFESDLAAHQDR                                     |    |    |    | 5.27 | 4.4  | 3    |
|        |       | FAIQDISVEETSAK                                     |    |    |    | 2.19 | 2.5  | 2    |
|        |       | ETTDTDADQVIASF                                     |    |    |    | 1.19 | 4.4  | 2    |
| O75347 | TBCA  | Tubulin_specific chaperone A                       | 2  | 3  | 5  | 1.38 | 1.74 | 0.61 |
|        |       | ILENEKDLEEAEEYKEAR                                 |    |    |    | 1.34 | 4.1  | 3    |
|        |       | LEAAYLDLQR                                         |    |    |    | 1.59 | 3.2  | 2    |
| O75368 | SH3L1 | SH3 domain_binding glutamic acid_rich_like protein | 3  | 3  | 36 | 1.89 | 1.35 | 0.00 |
|        |       | VYIASSGSTAIK                                       |    |    |    | 1.94 | 3.2  | 2    |
|        |       | ENVPENSRPATGYPLPPQIFNESQYR                         |    |    |    | 1.86 | 5.0  | 3    |
|        |       | QQDVLGFLEANK                                       |    |    |    | 2.05 | 3.2  | 2    |
| O75436 | VP26A | Vacuolar protein sorting_associated protein 26A    | 2  | 2  | 2  | 0.99 | 1.04 | 0.97 |
|        |       | EITGIGPSTTTETETIAK                                 |    |    |    | 0.94 | 3.2  | 2    |
|        |       | HYLFYDGESVSGK                                      |    |    |    | 1.00 | 2.4  | 2    |
| O75874 | IDHC  | Isocitrate dehydrogenase [NADP] cytoplasmic        | 4  | 5  | 13 | 1.88 | 1.03 | 0.04 |
|        |       | VEITYTPSDGTQK                                      |    |    |    | 2.58 | 3.0  | 2    |
|        |       | ISGGSVVEMQGDENR                                    |    |    |    | 1.38 | 3.6  | 2    |

|        |       |                                                 |    |    |       |       |       |      |
|--------|-------|-------------------------------------------------|----|----|-------|-------|-------|------|
|        |       | IIWELIK                                         |    |    | 2.06  | 2.5   | 2     |      |
|        |       | TVEAEAAHGTVTR                                   |    |    | 1.67  | 3.2   | 2     |      |
| O75882 | ATRN  | Attractin                                       | 2  | 4  | 8     | 0.69  | 0.40  | 0.07 |
|        |       | LTGSSGFVTDGPGNYK                                |    |    | 0.68  | 4.0   | 2     |      |
|        |       | SCALDQNCQWEPR                                   |    |    | 0.74  | 3.6   | 2     |      |
| O75915 | PRAF3 | PRA1 family protein 3                           | 2  | 2  | 4     | 0.60  | 1.64  | 0.69 |
|        |       | NKLENKMEGIGLK+Oxidation(6)                      |    |    | 0.60  | 2.6   | 2     |      |
|        |       | AWDDFFPGSDR                                     |    |    | 6.19  | 2.9   | 2     |      |
| O95436 | NPT2B | Sodium_dependent phosphate transport protein 2B | 3  | 6  | 26    | 0.61  | 0.14  | 0.00 |
|        |       | YLEGAAGQQPTAPDK                                 |    |    | 0.77  | 4.3   | 2     |      |
|        |       | SLKPWDAVVS                                      |    |    | 0.13  | 2.4   | 2     |      |
|        |       | LQNWNFLPLWMR                                    |    |    | 0.31  | 3.5   | 2     |      |
| O96009 | NAPSA | Napsin_A                                        | 4  | 8  | 90    | 0.39  | 0.27  | 0.00 |
|        |       | FAIQYGTGR                                       |    |    | 0.55  | 3.2   | 2     |      |
|        |       | VGPGLTCAK                                       |    |    | 0.53  | 3.1   | 2     |      |
|        |       | VDGILSEDKLTIGGIK                                |    |    | 0.62  | 3.2   | 2     |      |
|        |       | GCAAILDTGTSLITGPTEEIR                           |    |    | 0.38  | 6.6   | 2     |      |
| P00325 | ADH1B | Alcohol dehydrogenase 1B                        | 2  | 3  | 6     | 12.86 | 13.23 | 0.00 |
|        |       | VCLIGCGFSTGYGSVAVNAK                            |    |    | 12.23 | 4.8   | 2     |      |
|        |       | KFSLDALITHVLPFEK                                |    |    | 43.69 | 3.7   | 3     |      |
| P00326 | ADH1G | Alcohol dehydrogenase 1C                        | 3  | 4  | 8     | 0.77  | 0.32  | 0.18 |
|        |       | ELGATECINPQDYK                                  |    |    | 2.17  | 3.7   | 2     |      |
|        |       | AAVLWELK                                        |    |    | 0.15  | 2.4   | 2     |      |
|        |       | INEGFDLLR                                       |    |    | 0.14  | 2.4   | 2     |      |
| P00338 | LDHA  | L_lactate dehydrogenase A chain                 | 2  | 2  | 15    | 0.85  | 1.11  | 0.87 |
|        |       | VTLTSEEEAR                                      |    |    | 0.84  | 3.2   | 2     |      |
|        |       | FIIPNVVK                                        |    |    | 1.59  | 2.3   | 2     |      |
| P00352 | AL1A1 | Retinal dehydrogenase 1                         | 17 | 31 | 147   | 1.46  | 0.19  | 1.00 |
|        |       | VAFTGSTVEVGK                                    |    |    | 1.18  | 2.6   | 2     |      |
|        |       | SLDDVIK                                         |    |    | 0.64  | 2.4   | 2     |      |
|        |       | ILDIESGKK                                       |    |    | 1.74  | 2.8   | 2     |      |
|        |       | IFINNEWHDSVSGK                                  |    |    | 0.97  | 3.9   | 2     |      |
|        |       | ELGEYGFHEYTEVK                                  |    |    | 1.30  | 3.3   | 2     |      |
|        |       | ANNTFYGLSAGVFTK                                 |    |    | 1.13  | 4.6   | 2     |      |
|        |       | GYFVQPTVFSNVTDEMR+Oxidation(15)                 |    |    | 1.19  | 4.5   | 2     |      |
|        |       | LYSNAYLNLAGCIK                                  |    |    | 0.83  | 4.5   | 2     |      |
|        |       | EEIFGPVQQIMK                                    |    |    | 1.10  | 3.5   | 2     |      |
|        |       | IGPALSCGNTVVVKPAEQTPLTALHVASLIK                 |    |    | 1.00  | 5.4   | 3     |      |
|        |       | GYFVQPTVFSNVTDEMR                               |    |    | 1.40  | 5.2   | 2     |      |
|        |       | YILGNPLTPGVTQGPQIDKEQYDK                        |    |    | 0.89  | 3.7   | 2     |      |
|        |       | LECGGPWGNK                                      |    |    | 0.57  | 2.6   | 2     |      |
|        |       | KYILGNPLTPGVTQGPQIDKEQYDK                       |    |    | 1.08  | 4.2   | 3     |      |
|        |       | LLLATMESMNGGK                                   |    |    | 0.53  | 2.6   | 2     |      |
|        |       | KFPVFNPAEEELCQVEEGDKEDVDK                       |    |    | 1.14  | 3.9   | 4     |      |
|        |       | YILGNPLTPGVTQGPQIDK                             |    |    | 1.30  | 3.7   | 2     |      |
| P00450 | CERU  | Ceruloplasmin                                   | 29 | 65 | 350   | 0.81  | 0.11  | 0.04 |
|        |       | IYSHIDAPK                                       |    |    | 0.60  | 2.7   | 2     |      |
|        |       | VDKDNEDFQESNR                                   |    |    | 0.35  | 3.1   | 2     |      |
|        |       | VNKDDEEFIESNK                                   |    |    | 0.54  | 4.6   | 2     |      |
|        |       | TYCSEPEKVDKDNEDFQESNR                           |    |    | 0.62  | 4.6   | 3     |      |



|        |      |                                    |    |    |      |      |      |      |
|--------|------|------------------------------------|----|----|------|------|------|------|
|        |      | EYTDASFTNR                         |    |    | 0.83 | 3.3  | 2    |      |
|        |      | NNEGTYYSFNYPNQRS                   |    |    | 0.55 | 4.9  | 2    |      |
|        |      | MFTTAPDQVDKEDEDFQESNK+Oxidation(0) |    |    | 0.68 | 4.3  | 3    |      |
|        |      | KAEEEEHLGILGPQLHADVGDKVK           |    |    | 0.80 | 4.3  | 4    |      |
|        |      | KAEEEEHLGILGPQLHADVGDK             |    |    | 0.89 | 6.4  | 3    |      |
|        |      | QSEDSTFYLGER                       |    |    | 0.66 | 3.1  | 2    |      |
|        |      | EVGPTNADPVCLAK                     |    |    | 0.99 | 3.2  | 2    |      |
|        |      | KLISVDTEHSNIYLQNGPDR               |    |    | 0.74 | 6.2  | 2    |      |
|        |      | MFTTAPDQVDKEDEDFQESNK              |    |    | 0.55 | 4.0  | 2    |      |
|        |      | AEEEEHLGILGPQLHADVGDK              |    |    | 0.79 | 5.0  | 3    |      |
|        |      | LISVDTEHSNIYLQNGPDR                |    |    | 0.74 | 4.9  | 2    |      |
|        |      | ALYLQYTDDEFR                       |    |    | 0.85 | 4.2  | 2    |      |
|        |      | GAYPLSIEPIGVR                      |    |    | 0.95 | 3.7  | 2    |      |
|        |      | HYYIGIETTWDYASDHGEK                |    |    | 0.75 | 6.4  | 3    |      |
|        |      | MYSVNGYTFGSLPGLSMCAEDR             |    |    | 0.70 | 4.5  | 2    |      |
|        |      | DIFTGLIGPMK                        |    |    | 0.47 | 2.9  | 1    |      |
|        |      | DIASGLIGPLIICK                     |    |    | 0.98 | 3.8  | 2    |      |
|        |      | TTIEKPVWLGFGLPIIK                  |    |    | 0.88 | 4.5  | 2    |      |
|        |      | GPEEEHLGILGPVIWAIEVGDITR           |    |    | 0.53 | 5.2  | 3    |      |
|        |      | DLYSGLIGPLIVCR                     |    |    | 0.66 | 3.2  | 2    |      |
|        |      | MYSAVDPTK+Oxidation(0)             |    |    | 1.10 | 2.4  | 2    |      |
|        |      | AGLQAFFQVQECNK                     |    |    | 1.29 | 3.5  | 2    |      |
|        |      | DIFTGLIGPMK+Oxidation(9)           |    |    | 0.63 | 2.6  | 2    |      |
|        |      | ERGPEEEHLGILGPVIWAIEVGDITR         |    |    | 0.36 | 5.8  | 3    |      |
|        |      | HYYIAAEEIIWNYAPSGIDIFTK            |    |    | 0.92 | 5.4  | 3    |      |
| P00558 | PGK1 | Phosphoglycerate kinase 1          | 10 | 17 | 59   | 1.49 | 0.60 | 0.00 |
|        |      | GCITIIGGGDTATCCA                   |    |    | 1.61 | 4.9  | 2    |      |
|        |      | ALESPERPFLAILGGAK                  |    |    | 1.50 | 4.4  | 3    |      |
|        |      | ITLPVDFVTADKFDENAK                 |    |    | 1.45 | 3.7  | 2    |      |
|        |      | VLPDGDALSNI                        |    |    | 1.68 | 2.3  | 2    |      |
|        |      | AHSSMVGVNLPQK                      |    |    | 2.47 | 3.1  | 2    |      |
|        |      | TGQATVASGIPAGWMGLDCGPESK           |    |    | 2.33 | 3.3  | 2    |      |
|        |      | ACANPAAGSVILLENLR                  |    |    | 1.26 | 4.8  | 2    |      |
|        |      | ITLPVDFVTADK                       |    |    | 1.23 | 2.3  | 2    |      |
|        |      | IQLINMLDK                          |    |    | 1.30 | 2.8  | 2    |      |
|        |      | YSLEPVAVELK                        |    |    | 1.25 | 2.4  | 2    |      |
| P00568 | KAD1 | Adenylate kinase isoenzyme 1       | 3  | 3  | 11   | 1.11 | 0.67 | 0.01 |
|        |      | EVQQGEEFER                         |    |    | 1.21 | 2.5  | 2    |      |
|        |      | KVNAEGSVDSVFSQVCTHLDALK            |    |    | 2.27 | 5.1  | 3    |      |
|        |      | YGYTHLSTGDLR                       |    |    | 0.98 | 2.6  | 2    |      |
| P00734 | THRB | Prothrombin                        | 16 | 31 | 101  | 1.27 | 0.25 | 1.00 |
|        |      | YTACETAR                           |    |    | 0.87 | 2.5  | 2    |      |
|        |      | RQECVIPVCGQDQVTAMTPR               |    |    | 1.34 | 4.6  | 3    |      |
|        |      | TATSEYQTFNPR                       |    |    | 1.14 | 3.1  | 2    |      |
|        |      | SEGSSVNLSPPLEQCVDR                 |    |    | 1.10 | 3.9  | 2    |      |
|        |      | KSPQELLCGASLISDR                   |    |    | 1.11 | 3.6  | 3    |      |
|        |      | ELLESYIDGR                         |    |    | 1.27 | 3.0  | 2    |      |
|        |      | LAVTTHGLPCLAWASAQAK                |    |    | 0.75 | 4.1  | 2    |      |
|        |      | GQPSVLQVNLPIVERPVCK                |    |    | 1.59 | 4.1  | 2    |      |
|        |      | SGIECQLWR                          |    |    | 1.30 | 2.9  | 2    |      |

|        |      |                                    |    |    |      |      |      |      |
|--------|------|------------------------------------|----|----|------|------|------|------|
|        |      | DKLAACLEGNCAEGLGTNYR               |    |    | 1.20 | 5.6  | 2    |      |
|        |      | ETAASLLQAGYK                       |    |    | 0.43 | 2.6  | 2    |      |
|        |      | TFGSGEADCGLRPLFEK                  |    |    | 1.15 | 4.0  | 2    |      |
|        |      | LAACLEGNCAEGLGTNYR                 |    |    | 1.46 | 4.6  | 2    |      |
|        |      | NPDSSTTGPWCYTTPDPTVR               |    |    | 1.14 | 4.1  | 2    |      |
|        |      | WYQMGIVSWGEGCDR                    |    |    | 1.30 | 3.8  | 2    |      |
|        |      | GDACEGDSGGPFVMK                    |    |    | 0.48 | 3.1  | 2    |      |
| P00738 | HPT  | Haptoglobin                        | 23 | 69 | 556  | 3.22 | 0.26 | 0.00 |
|        |      | HYEGSTVPEK                         |    |    | 1.06 | 2.6  | 2    |      |
|        |      | ILGGHLDK                           |    |    | 0.80 | 3.2  | 2    |      |
|        |      | TEGDGVYTLNDKK                      |    |    | 2.62 | 3.7  | 2    |      |
|        |      | TEGDGVYTLNNEK                      |    |    | 2.41 | 3.8  | 2    |      |
|        |      | AVGDKLPECEAVCGKPK                  |    |    | 1.41 | 4.7  | 3    |      |
|        |      | LRTEGDGVYTLNNEK                    |    |    | 2.27 | 4.7  | 2    |      |
|        |      | LRTEGDGVYTLNDKK                    |    |    | 2.31 | 4.7  | 2    |      |
|        |      | LRTEGDGVYTLNDK                     |    |    | 3.17 | 4.6  | 2    |      |
|        |      | TEGDGVYTLNDK                       |    |    | 3.37 | 4.1  | 2    |      |
|        |      | VGYSVSWGR                          |    |    | 1.17 | 3.6  | 2    |      |
|        |      | LPECEADDGCPKPPEIAHGYVEHSVR         |    |    | 7.07 | 5.5  | 4    |      |
|        |      | AVGDKLPECEADDGCPKPPEIAHGYVEHSVR    |    |    | 5.38 | 6.0  | 4    |      |
|        |      | GSFPWQAK                           |    |    | 1.33 | 2.7  | 2    |      |
|        |      | SCAVAEYGVYVK                       |    |    | 1.68 | 4.5  | 2    |      |
|        |      | VTSIQDWVQK                         |    |    | 1.49 | 3.6  | 2    |      |
|        |      | YVMLPVADQDQCIR+Oxidation(2)        |    |    | 1.36 | 4.9  | 2    |      |
|        |      | SPVGVQPILNEHTFCAGMSK               |    |    | 2.12 | 4.4  | 2    |      |
|        |      | YVMLPVADQDQCIR                     |    |    | 1.67 | 4.6  | 2    |      |
|        |      | DYAEVGR                            |    |    | 0.87 | 2.1  | 1    |      |
|        |      | QLVEIEK                            |    |    | 0.33 | 2.2  | 1    |      |
|        |      | SPVGVQPILNEHTFCAGMSK+Oxidation(17) |    |    | 1.52 | 3.7  | 3    |      |
|        |      | VVLHPNYSQVDIGLIK                   |    |    | 1.50 | 4.7  | 3    |      |
|        |      | DIAPTLTLYVGK                       |    |    | 1.36 | 2.5  | 2    |      |
| P00739 | HPTR | Haptoglobin_related protein        | 2  | 2  | 5    | 0.63 | 0.34 | 0.00 |
|        |      | VGYSVSWGQSDNFK                     |    |    | 0.62 | 3.9  | 2    |      |
|        |      | VVLHPNYHQVDIGLIK                   |    |    | 1.36 | 3.8  | 3    |      |
| P00746 | CFAD | Complement factor D                | 6  | 11 | 33   | 1.00 | 0.33 | 0.99 |
|        |      | VQVLLGAHSLSQPEPSKR                 |    |    | 0.93 | 3.7  | 3    |      |
|        |      | GDSGGPLVCGGVLEGVVTSGSR             |    |    | 1.02 | 6.1  | 2    |      |
|        |      | VDRDVAPGTLCDVAGWGIVNHAGR           |    |    | 0.98 | 5.1  | 3    |      |
|        |      | DSCCKGDSGGPLVCGGVLEGVVTSGSR        |    |    | 0.91 | 5.2  | 2    |      |
|        |      | VQVLLGAHSLSQPEPSK                  |    |    | 0.55 | 3.2  | 2    |      |
|        |      | RPDSLQHVLLPVLDLDR                  |    |    | 0.82 | 3.5  | 3    |      |
| P00747 | PLMN | Plasminogen                        | 13 | 24 | 94   | 1.18 | 0.37 | 0.14 |
|        |      | GNVAVTVSGHTCQHWSAQTPHTHNR          |    |    | 1.70 | 4.3  | 4    |      |
|        |      | HSIFTPETNPR                        |    |    | 1.38 | 3.2  | 2    |      |
|        |      | CTTPPPSSGPTYQCLK                   |    |    | 0.89 | 3.5  | 2    |      |
|        |      | ELRPWCFTTDPNKR                     |    |    | 1.60 | 4.4  | 3    |      |
|        |      | VILGAHQEVNLEPHVQEIEVSR             |    |    | 2.03 | 3.7  | 3    |      |
|        |      | VQSTELCAGHLAGGTDCQGDGGPLVCFEK      |    |    | 1.39 | 4.7  | 3    |      |
|        |      | TECFITGWGETQGTFGAGLLK              |    |    | 1.17 | 5.1  | 2    |      |
|        |      | FVTWIEGVMR                         |    |    | 1.20 | 2.8  | 2    |      |

|        |      |                                       |    |    |      |      |      |      |
|--------|------|---------------------------------------|----|----|------|------|------|------|
|        |      | EQQCVIMAENR                           |    |    | 0.73 | 2.7  | 2    |      |
|        |      | QLGAGSIEECAAK                         |    |    | 1.14 | 3.1  | 2    |      |
|        |      | KLYDYCDVPQCAAPSFDCGKPKQVEPK           |    |    | 3.72 | 4.5  | 3    |      |
|        |      | CEEDEEFTCR                            |    |    | 1.02 | 2.7  | 2    |      |
|        |      | VIPACLSPNYVVADR                       |    |    | 1.38 | 3.6  | 2    |      |
| P00748 | FA12 | Coagulation factor XII                | 2  | 5  | 20   | 0.91 | 0.53 | 0.52 |
|        |      | GRPGPQPWCATTPNFDQDQR                  |    |    | 1.24 | 4.1  | 3    |      |
|        |      | TTLSGAPCQPWASEATYR                    |    |    | 0.89 | 4.4  | 2    |      |
| P00751 | CFAB | Complement factor B                   | 17 | 36 | 175  | 0.86 | 0.16 | 0.00 |
|        |      | LEDSVTYHCSR                           |    |    | 0.76 | 3.7  | 2    |      |
|        |      | ALFVSEEEKK                            |    |    | 1.20 | 2.8  | 2    |      |
|        |      | VSEADSSNADWVTK                        |    |    | 1.04 | 4.9  | 2    |      |
|        |      | KCLVNLIEK                             |    |    | 0.73 | 2.3  | 2    |      |
|        |      | YGQTIRPICLPCTEGTTR                    |    |    | 0.85 | 3.7  | 3    |      |
|        |      | FLCTGGVSPYADPNTCR                     |    |    | 0.94 | 4.5  | 2    |      |
|        |      | WSGQTAICDNGAGYCSNPGPIGTR              |    |    | 1.11 | 4.8  | 2    |      |
|        |      | EKLQDEDLGFL                           |    |    | 1.44 | 3.3  | 2    |      |
|        |      | LLQEGQALEYVCPSGFYYPVQTR               |    |    | 0.98 | 4.3  | 3    |      |
|        |      | DAQYAPGYDK                            |    |    | 0.73 | 2.7  | 2    |      |
|        |      | DISEVVTPR                             |    |    | 1.19 | 2.5  | 2    |      |
|        |      | HVILMTDGLHNMGGDPITVIDEIR              |    |    | 1.51 | 4.9  | 3    |      |
|        |      | HVILMTDGLHNMGGDPITVIDEIR+Oxidation(5) |    |    | 1.08 | 3.5  | 3    |      |
|        |      | FIQVGVISWGVVDVCK                      |    |    | 1.27 | 4.0  | 2    |      |
|        |      | YGLVTYATYPK                           |    |    | 1.01 | 3.5  | 2    |      |
|        |      | VKDISEVVTPR                           |    |    | 1.08 | 3.2  | 2    |      |
|        |      | EELLPAQDIK                            |    |    | 0.68 | 2.1  | 1    |      |
| P00915 | CAH1 | Carbonic anhydrase 1                  | 8  | 11 | 45   | 0.50 | 0.28 | 0.81 |
|        |      | YSAELHVAHWNSAK                        |    |    | 0.56 | 4.3  | 2    |      |
|        |      | HDTSLKPISVSYNPATAK                    |    |    | 0.18 | 4.7  | 2    |      |
|        |      | ADGLAVIGVLMKVGEANPK                   |    |    | 0.56 | 2.1  | 1    |      |
|        |      | LYPIANGNNQSPVDIK                      |    |    | 0.37 | 4.8  | 2    |      |
|        |      | VLDALQAIK                             |    |    | 0.43 | 3.4  | 2    |      |
|        |      | EIINVGHSHFVNFEDNDNR                   |    |    | 0.72 | 4.2  | 2    |      |
|        |      | ADGLAVIGVLMK                          |    |    | 0.57 | 3.9  | 2    |      |
|        |      | ESISVSSEQLAQFR                        |    |    | 0.55 | 3.6  | 2    |      |
| P00918 | CAH2 | Carbonic anhydrase 2                  | 4  | 6  | 11   | 1.68 | 1.66 | 0.21 |
|        |      | VVDVLDSIK                             |    |    | 2.33 | 2.4  | 2    |      |
|        |      | YDPSLKPLSVSYDQATSLR                   |    |    | 3.47 | 3.9  | 3    |      |
|        |      | AVQQPDGLAVLGIFLK                      |    |    | 1.34 | 3.5  | 2    |      |
|        |      | SADFTNFDPR                            |    |    | 3.17 | 2.3  | 2    |      |
| P01008 | ANT3 | Antithrombin_III                      | 17 | 43 | 328  | 1.14 | 0.11 | 0.96 |
|        |      | KATEDEGSEQKIPEATNR                    |    |    | 0.84 | 4.5  | 3    |      |
|        |      | ATEDEGSEQKIPEATNR                     |    |    | 0.71 | 4.5  | 2    |      |
|        |      | ADGESCSASMMYQEGK+Oxidation(9)         |    |    | 0.76 | 4.6  | 2    |      |
|        |      | ADGESCSASMMYQEGK+Oxidation(10)        |    |    | 0.76 | 4.6  | 2    |      |
|        |      | RVWELSK                               |    |    | 1.10 | 2.5  | 2    |      |
|        |      | ADGESCSASMMYQEGK                      |    |    | 0.38 | 4.3  | 2    |      |
|        |      | DDLVSDAFHK                            |    |    | 0.97 | 3.0  | 2    |      |
|        |      | FATTFYQHLADSK                         |    |    | 0.96 | 3.9  | 2    |      |
|        |      | TSDQIHFFFAK                           |    |    | 0.81 | 3.1  | 2    |      |

|        |      |                                                   |    |     |      |      |      |      |
|--------|------|---------------------------------------------------|----|-----|------|------|------|------|
|        |      | VAEGTQVLELPFK                                     |    |     | 1.21 | 3.9  | 2    |      |
|        |      | DIPMNPNCIYR                                       |    |     | 0.94 | 2.7  | 1    |      |
|        |      | AFLEVNEEGSEAAASTAVVIAGR                           |    |     | 1.11 | 7.0  | 2    |      |
|        |      | FRIEDGFSLK                                        |    |     | 1.36 | 4.3  | 3    |      |
|        |      | ANRPFLVFIR                                        |    |     | 0.73 | 3.5  | 3    |      |
|        |      | SKLPGIVAEGR                                       |    |     | 1.32 | 2.9  | 2    |      |
|        |      | NDNDNIFLSPLSISTAFAMTK+Oxidation(18)               |    |     | 0.90 | 3.6  | 3    |      |
|        |      | ADGESCSASMMYQEGK+Oxidation(9),Oxidation(10)       |    |     | 1.17 | 3.9  | 2    |      |
| P01009 | A1AT | Alpha_1_antitrypsin                               | 33 | 141 | 1408 | 1.07 | 0.07 | 0.00 |
|        |      | TDTSHHDQDHPTFNK                                   |    |     | 0.70 | 4.2  | 3    |      |
|        |      | KQINDYVEK                                         |    |     | 0.72 | 3.1  | 2    |      |
|        |      | FLEDVKK                                           |    |     | 0.69 | 2.6  | 2    |      |
|        |      | SASLHLPK                                          |    |     | 0.90 | 2.8  | 2    |      |
|        |      | QINDYVEK                                          |    |     | 0.68 | 2.0  | 1    |      |
|        |      | GKWERPFEVK                                        |    |     | 0.97 | 3.4  | 2    |      |
|        |      | LGMFNIQHCK+Oxidation(2)                           |    |     | 0.66 | 3.8  | 3    |      |
|        |      | AVLTIDEK                                          |    |     | 0.96 | 2.9  | 2    |      |
|        |      | WERPFEVK                                          |    |     | 1.18 | 2.6  | 2    |      |
|        |      | LGMFNIQHCK                                        |    |     | 0.42 | 3.0  | 2    |      |
|        |      | LVDKFLEDVKK                                       |    |     | 1.23 | 3.7  | 3    |      |
|        |      | KLYHSEFTVNFVGDTEEAkk                              |    |     | 1.65 | 5.8  | 3    |      |
|        |      | DTEEDFHVDQVTTVK                                   |    |     | 0.93 | 5.5  | 2    |      |
|        |      | LQHLENELTHDIITK                                   |    |     | 1.11 | 5.2  | 4    |      |
|        |      | KLYHSEFTVNFVGDTEEAk                               |    |     | 0.91 | 6.2  | 2    |      |
|        |      | LYHSEFTVNFVGDTEEAkk                               |    |     | 0.95 | 6.5  | 2    |      |
|        |      | KLSSWVLLMK+Oxidation(8)                           |    |     | 1.26 | 2.6  | 2    |      |
|        |      | LSITGTYDLK                                        |    |     | 0.82 | 3.2  | 2    |      |
|        |      | GKWERPFEVKDTEEDFHVDQVTTVK                         |    |     | 2.30 | 5.5  | 4    |      |
|        |      | LYHSEFTVNFVGDTEEAk                                |    |     | 0.84 | 5.7  | 2    |      |
|        |      | SVLGQLGITK                                        |    |     | 1.07 | 3.7  | 2    |      |
|        |      | VFSNGADLSGVTEEAPlK                                |    |     | 1.00 | 6.1  | 2    |      |
|        |      | KLSSWVLLMK                                        |    |     | 1.85 | 3.1  | 2    |      |
|        |      | LSSWVLLMK                                         |    |     | 0.62 | 2.3  | 2    |      |
|        |      | FNKPFVFLMIEQNTK                                   |    |     | 3.84 | 4.7  | 3    |      |
|        |      | TLNQPDSQLQLTTGNGLFLSEGLK                          |    |     | 1.32 | 6.4  | 3    |      |
|        |      | GTEAAGAMFLEAIPMSIPPEVK+Oxidation(7),Oxidation(14) |    |     | 1.10 | 2.4  | 2    |      |
|        |      | GTEAAGAMFLEAIPMSIPPEVK+Oxidation(7)               |    |     | 1.06 | 4.1  | 2    |      |
|        |      | GTEAAGAMFLEAIPMSIPPEVK+Oxidation(14)              |    |     | 1.09 | 2.4  | 2    |      |
|        |      | WERPFEVKDTEEDFHVDQVTTVK                           |    |     | 2.09 | 5.9  | 3    |      |
|        |      | LSITGTYDLKSVLGQLGITK                              |    |     | 1.07 | 3.9  | 3    |      |
|        |      | FLENEDR                                           |    |     | 0.82 | 2.5  | 2    |      |
|        |      | FNKPFVFLMIEQNTK+Oxidation(8)                      |    |     | 3.44 | 3.9  | 3    |      |
| P01011 | AACT | Alpha_1_antichymotrypsin                          | 11 | 24  | 190  | 0.87 | 0.22 | 1.00 |
|        |      | NLAVSQVVHK                                        |    |     | 0.81 | 3.0  | 2    |      |
|        |      | ADLSGITGAR                                        |    |     | 0.94 | 3.6  | 2    |      |
|        |      | WRDSLEFR                                          |    |     | 1.06 | 2.9  | 2    |      |
|        |      | WEMPFDPQDTHQSR                                    |    |     | 1.18 | 3.1  | 2    |      |
|        |      | EIGELYLPK                                         |    |     | 0.95 | 2.4  | 2    |      |
|        |      | DEELSCTVVELK                                      |    |     | 1.08 | 4.5  | 2    |      |
|        |      | LYGSEAFATDFQDSAAAK                                |    |     | 1.16 | 5.9  | 2    |      |

|        |      |                                  |    |    |      |      |      |      |
|--------|------|----------------------------------|----|----|------|------|------|------|
|        |      | AVLDVFEEGTEASAATAVK              |    |    | 1.04 | 6.4  | 2    |      |
|        |      | ITLLSALVETR                      |    |    | 1.09 | 3.9  | 2    |      |
|        |      | MEEVEAMLLPETLK+Oxidation(0)      |    |    | 1.08 | 3.0  | 2    |      |
|        |      | MEEVEAMLLPETLK                   |    |    | 1.25 | 3.5  | 2    |      |
| P01019 | ANGT | Angiotensinogen                  | 7  | 10 | 57   | 0.77 | 0.28 | 0.18 |
|        |      | FMQAVTGWK                        |    |    | 1.18 | 2.6  | 2    |      |
|        |      | ALQDQLVLVAAK                     |    |    | 0.38 | 4.0  | 2    |      |
|        |      | DPTFIPAPIQAK                     |    |    | 0.66 | 2.5  | 2    |      |
|        |      | LQAILGVPWK                       |    |    | 0.77 | 3.2  | 2    |      |
|        |      | VLSALQAVQGLLVAQGR                |    |    | 0.90 | 4.7  | 3    |      |
|        |      | VEGLTFQQNSLNWMK                  |    |    | 0.72 | 3.1  | 2    |      |
|        |      | SLDFTELDVAEEK                    |    |    | 1.08 | 2.9  | 2    |      |
| P01023 | A2MG | Alpha_2_macroglobulin            | 41 | 94 | 547  | 2.31 | 0.21 | 0.00 |
|        |      | SIYKPGQTVK                       |    |    | 2.11 | 2.3  | 2    |      |
|        |      | KYSDASDCHGEDSQAFCEK              |    |    | 1.55 | 5.3  | 3    |      |
|        |      | YSDASDCHGEDSQAFCEK               |    |    | 1.56 | 5.7  | 2    |      |
|        |      | LVHVEEPHTETVR                    |    |    | 1.59 | 3.4  | 2    |      |
|        |      | HYDGSYSTFGER                     |    |    | 1.61 | 3.3  | 2    |      |
|        |      | LPPNVVEESAR                      |    |    | 2.15 | 3.3  | 2    |      |
|        |      | AAQVTIQSSGTFSSK                  |    |    | 2.35 | 5.2  | 2    |      |
|        |      | FSGQLNSHGCFYQQVK                 |    |    | 2.06 | 4.8  | 2    |      |
|        |      | AIGYLNTGYQR                      |    |    | 1.93 | 3.4  | 2    |      |
|        |      | QTVSWAVTPK                       |    |    | 1.74 | 2.4  | 2    |      |
|        |      | HNVIYINGITYTPVSSTNEK             |    |    | 1.47 | 6.1  | 2    |      |
|        |      | GHFSISIPVK                       |    |    | 2.15 | 2.9  | 2    |      |
|        |      | VTGEGCVYLQTSLK                   |    |    | 2.27 | 4.2  | 2    |      |
|        |      | TEVSSNHVLIYLDK                   |    |    | 1.31 | 4.1  | 2    |      |
|        |      | LHTEAQIQEEGTVVELTGR              |    |    | 2.46 | 6.9  | 2    |      |
|        |      | VDLSFSPSQSLPASHAHLR              |    |    | 5.11 | 4.6  | 2    |      |
|        |      | FEVQVTPVK                        |    |    | 1.73 | 3.6  | 2    |      |
|        |      | KDTVIKPLLVEPEGLEK                |    |    | 2.52 | 3.7  | 3    |      |
|        |      | QQNAQGGFSSTQDTVVALHALSK          |    |    | 3.79 | 4.0  | 2    |      |
|        |      | QGIPFFGQVR                       |    |    | 2.60 | 2.7  | 2    |      |
|        |      | DTVIKPLLVEPEGLEK                 |    |    | 1.71 | 4.3  | 3    |      |
|        |      | QFSFPLSSEPFQGSYK                 |    |    | 2.55 | 4.3  | 2    |      |
|        |      | VSVQLEASPAFLAVPVEK               |    |    | 2.72 | 5.2  | 2    |      |
|        |      | ALLAYAFALAGNQDK                  |    |    | 4.18 | 4.4  | 2    |      |
|        |      | ETTFNSLLCPSGGEVSEELSLK           |    |    | 3.35 | 5.0  | 2    |      |
|        |      | LLLQQVSLPELPGEYSMK+Oxidation(16) |    |    | 1.41 | 4.0  | 2    |      |
|        |      | YNILPEKEEFPFALGVQTLPTCDEPK       |    |    | 3.74 | 6.0  | 3    |      |
|        |      | AVDQSVLLMKPDAELSASSVYNLLPEK      |    |    | 3.12 | 4.0  | 2    |      |
|        |      | LLLQQVSLPELPGEYSMK               |    |    | 1.67 | 4.4  | 2    |      |
|        |      | LLIYAVLPTGDVIGDSAK               |    |    | 1.89 | 4.7  | 2    |      |
|        |      | SLFTDLEAENDVLHCVAFAVPAK          |    |    | 1.76 | 3.6  | 2    |      |
|        |      | YDVENCLANK                       |    |    | 2.28 | 3.5  | 2    |      |
|        |      | VTAAPQSVCALR                     |    |    | 1.49 | 3.3  | 2    |      |
|        |      | VGfyESDVMGR                      |    |    | 3.92 | 3.5  | 2    |      |
|        |      | EQAPHCICANGR                     |    |    | 0.32 | 2.9  | 2    |      |
|        |      | DNSVHWERPQKPK                    |    |    | 0.98 | 2.7  | 2    |      |
|        |      | TGTHGLLVK                        |    |    | 2.50 | 2.3  | 2    |      |

|        |     |                                             |    |     |      |      |      |      |
|--------|-----|---------------------------------------------|----|-----|------|------|------|------|
|        |     | VGFYESDVMGR+Oxidation(8)                    |    |     | 2.00 | 2.8  | 2    |      |
|        |     | MCPQLQQYEMHGPEGLR                           |    |     | 2.23 | 4.3  | 2    |      |
|        |     | NEDSLVQVQTDK                                |    |     | 3.54 | 4.0  | 2    |      |
|        |     | SPCYGYQWVSEEHEEAHHTAYLVFSPSK                |    |     | 1.66 | 4.8  | 4    |      |
| P01024 | CO3 | Complement C3                               | 74 | 231 | 1701 | 0.63 | 0.05 | 0.00 |
|        |     | FYHPEKEDGK                                  |    |     | 0.25 | 2.4  | 2    |      |
|        |     | TKKQELSEAEQATR                              |    |     | 0.41 | 4.6  | 3    |      |
|        |     | KQELSEAEQATR                                |    |     | 0.57 | 4.4  | 3    |      |
|        |     | SGSDEVQVGQQR                                |    |     | 0.88 | 4.1  | 2    |      |
|        |     | SDDKVTLEER                                  |    |     | 0.64 | 3.8  | 3    |      |
|        |     | HQQTVTIPPK                                  |    |     | 0.49 | 2.4  | 2    |      |
|        |     | QELSEAEQATR                                 |    |     | 0.52 | 3.3  | 2    |      |
|        |     | SEETKENEGFTVTAEGK                           |    |     | 0.50 | 5.3  | 3    |      |
|        |     | VSHSEDDCLAFK                                |    |     | 0.89 | 4.1  | 3    |      |
|        |     | CAEENCFIQK                                  |    |     | 0.49 | 3.6  | 2    |      |
|        |     | AAVYHHFISDGVR                               |    |     | 0.57 | 4.2  | 2    |      |
|        |     | KVLLDGVQNPR                                 |    |     | 0.63 | 3.4  | 2    |      |
|        |     | KGYTQQLAFR                                  |    |     | 0.69 | 3.8  | 3    |      |
|        |     | TGLQEVEVK                                   |    |     | 0.53 | 3.4  | 2    |      |
|        |     | ENEGFTVTAEGK                                |    |     | 0.71 | 3.1  | 2    |      |
|        |     | GQGTLVVTMYHAK+Oxidation(9)                  |    |     | 0.59 | 3.1  | 2    |      |
|        |     | VVLVAVDK                                    |    |     | 0.58 | 2.8  | 2    |      |
|        |     | ACEPGVDYVYK                                 |    |     | 0.65 | 3.6  | 2    |      |
|        |     | VLLDGVQNPR                                  |    |     | 0.50 | 3.3  | 2    |      |
|        |     | GYTQQLAFR                                   |    |     | 0.69 | 2.9  | 2    |      |
|        |     | DSCVGSVVK                                   |    |     | 0.58 | 3.1  | 2    |      |
|        |     | LSINTHPSQKPLSITVR                           |    |     | 0.38 | 4.3  | 3    |      |
|        |     | TFISPIK                                     |    |     | 0.66 | 2.4  | 2    |      |
|        |     | GQGTLVVTMYHAK                               |    |     | 0.76 | 3.2  | 2    |      |
|        |     | GLEVTITAR                                   |    |     | 0.70 | 3.2  | 2    |      |
|        |     | IWDVVEK                                     |    |     | 0.58 | 2.5  | 2    |      |
|        |     | FYYIYNEK                                    |    |     | 0.71 | 2.5  | 2    |      |
|        |     | RIPIEDGSGEVLSR                              |    |     | 0.64 | 4.7  | 2    |      |
|        |     | IHWESASLLR                                  |    |     | 0.59 | 2.7  | 1    |      |
|        |     | EGVQKEDIPPADLSDQVPDTESETR                   |    |     | 0.54 | 5.7  | 3    |      |
|        |     | TIYTPGSTVLYR                                |    |     | 0.64 | 2.9  | 2    |      |
|        |     | DTWVEHWPEEDECQDEENQK                        |    |     | 0.58 | 6.9  | 3    |      |
|        |     | EDIPPADLSDQVPDTESETR                        |    |     | 0.47 | 5.2  | 2    |      |
|        |     | DICEEQVNSLPGSITK                            |    |     | 0.81 | 4.8  | 2    |      |
|        |     | TVMVNIENPEGIPVK+Oxidation(2)                |    |     | 0.58 | 4.0  | 2    |      |
|        |     | VELLHNPAFCSLATTK                            |    |     | 0.59 | 4.8  | 3    |      |
|        |     | VPVAVQGEDTVQSLTQGDGVAK                      |    |     | 0.72 | 6.1  | 2    |      |
|        |     | FVTVQATFGTQVVEK                             |    |     | 0.68 | 5.1  | 2    |      |
|        |     | NTLIYLDK                                    |    |     | 0.63 | 2.7  | 2    |      |
|        |     | EVVADSVWVDVK                                |    |     | 0.55 | 4.0  | 2    |      |
|        |     | VHQYFNVELIQPGAVK                            |    |     | 0.60 | 4.7  | 3    |      |
|        |     | SLYVSATVILHSGSDMVQAER+Oxidation(15)         |    |     | 0.69 | 4.0  | 3    |      |
|        |     | ILLQGTPVAQMTEDAVER+Oxidation(10)            |    |     | 0.75 | 5.7  | 2    |      |
|        |     | LESEETMVLEAHDAQGDVPVTVTVHDFPGK+Oxidation(6) |    |     | 1.55 | 4.4  | 4    |      |
|        |     | SYTVAIAGYALAMGR+Oxidation(13)               |    |     | 0.76 | 3.8  | 2    |      |

|        |       |                                      |    |    |      |      |      |      |
|--------|-------|--------------------------------------|----|----|------|------|------|------|
|        |       | SGIPIVTSPTYQIHFTK                    |    |    | 0.62 | 4.7  | 2    |      |
|        |       | AGDFLEANYMNLQR                       |    |    | 0.71 | 3.7  | 2    |      |
|        |       | LESEETMVLEAHDAQGDVPVTVTVHDFPGK       |    |    | 0.57 | 5.3  | 3    |      |
|        |       | SNLDEDIIAENIVSR                      |    |    | 0.69 | 5.5  | 2    |      |
|        |       | SLYVSATVILHSGSDMVQAER                |    |    | 0.67 | 6.0  | 3    |      |
|        |       | DAPDHQELNLDVSLQLPSR                  |    |    | 0.87 | 4.9  | 2    |      |
|        |       | TELRPGETLNVNFLLR                     |    |    | 0.66 | 5.2  | 3    |      |
|        |       | DYAGVFSDAGLTFTSSSGQQTQR              |    |    | 0.59 | 6.5  | 2    |      |
|        |       | ILLQGTPVAQMTEDAUDAER                 |    |    | 0.70 | 6.3  | 3    |      |
|        |       | SYTVAIAGYALQMGR                      |    |    | 0.70 | 4.9  | 2    |      |
|        |       | DFDFVPPVVR                           |    |    | 0.60 | 3.4  | 2    |      |
|        |       | SSLSVPYVIVPLK                        |    |    | 0.79 | 4.2  | 3    |      |
|        |       | LCRDELCR                             |    |    | 0.32 | 2.6  | 2    |      |
|        |       | VRVELLHNPAFCSLATTK                   |    |    | 0.65 | 4.1  | 3    |      |
|        |       | ADIGCTPGSGK                          |    |    | 0.48 | 2.9  | 2    |      |
|        |       | SGQSEDRQPVPVPGQMTLK                  |    |    | 0.60 | 4.3  | 2    |      |
|        |       | IPIEDGSGEVLSR                        |    |    | 0.94 | 4.2  | 2    |      |
|        |       | LESEETMVLEAHDAQGDVPVTVTVHDFPGK       |    |    | 0.59 | 5.1  | 3    |      |
|        |       | VYAYYNLEESCTR                        |    |    | 0.83 | 4.3  | 2    |      |
|        |       | TMQALPYSTVGNSNNYLHLSVLR+Oxidation(1) |    |    | 0.93 | 3.7  | 3    |      |
|        |       | VFLDCCNYITELR                        |    |    | 0.84 | 3.9  | 2    |      |
|        |       | EYVLPSEFVIVEPTEK                     |    |    | 1.33 | 4.6  | 2    |      |
|        |       | YYTYLIMNK                            |    |    | 0.66 | 2.5  | 2    |      |
|        |       | NTMILEICTR                           |    |    | 0.84 | 2.7  | 2    |      |
|        |       | QKPDGVFQEDAPVIHQEMIGGLR              |    |    | 0.57 | 4.1  | 3    |      |
|        |       | TVMVNIENPEGIPVK                      |    |    | 0.97 | 3.7  | 2    |      |
|        |       | TMQALPYSTVGNSNNYLHLSVLR              |    |    | 0.83 | 4.0  | 2    |      |
|        |       | LMNIFLK                              |    |    | 0.40 | 2.5  | 2    |      |
|        |       | KVEGTAFVIFGIQDGEQR                   |    |    | 1.45 | 4.8  | 2    |      |
| P01031 | CO5   | Complement C5                        | 3  | 3  | 24   | 0.79 | 0.42 | 0.01 |
|        |       | TDAPDLPEENQAR                        |    |    | 0.72 | 2.8  | 2    |      |
|        |       | FQNSAILTIQPK                         |    |    | 0.78 | 3.6  | 2    |      |
|        |       | LHMKTLLPVSKPEIR+Oxidation(2)         |    |    | 0.95 | 2.8  | 2    |      |
| P01033 | TIMP1 | Metalloproteinase inhibitor 1        | 3  | 3  | 4    | 1.69 | 0.76 | 0.29 |
|        |       | GFQALGDAADIR                         |    |    | 1.49 | 2.7  | 2    |      |
|        |       | TYTVGCEECTVFPCLSIPCK                 |    |    | 1.85 | 2.7  | 2    |      |
|        |       | LQSGTHCLWTDQLLQGSEK                  |    |    | 0.88 | 4.5  | 3    |      |
| P01034 | CYTC  | Cystatin_C                           | 3  | 4  | 20   | 1.40 | 1.04 | 0.13 |
|        |       | ALDFAVGEYNK                          |    |    | 1.40 | 3.4  | 2    |      |
|        |       | LVGGPMDASVEEEGVR                     |    |    | 0.88 | 3.5  | 2    |      |
|        |       | LVGGPMDASVEEEGVR+Oxidation(5)        |    |    | 2.28 | 3.5  | 2    |      |
| P01042 | KNG1  | Kininogen_1                          | 16 | 34 | 159  | 1.15 | 0.21 | 0.33 |
|        |       | AATGECTATVGK                         |    |    | 1.22 | 3.0  | 2    |      |
|        |       | ESNEELTESCETK                        |    |    | 1.11 | 4.0  | 2    |      |
|        |       | TWQDCEYK                             |    |    | 0.74 | 2.5  | 2    |      |
|        |       | RPPGFSPFR                            |    |    | 0.82 | 2.9  | 2    |      |
|        |       | YNSQNSNNQFVLYR                       |    |    | 0.99 | 4.0  | 2    |      |
|        |       | IASFSQNCDIYPGK                       |    |    | 1.11 | 3.1  | 2    |      |
|        |       | QVVAGLNFR                            |    |    | 1.12 | 2.3  | 2    |      |
|        |       | TVGSDTFYSFK                          |    |    | 1.09 | 3.2  | 2    |      |

|        |       |                                             |    |    |      |      |      |      |
|--------|-------|---------------------------------------------|----|----|------|------|------|------|
|        |       | DIPTNSPELEETLHTITK                          |    |    | 1.00 | 3.7  | 2    |      |
|        |       | IYPTVNCQPLGMISLMK+Oxidation(11)             |    |    | 2.06 | 4.3  | 2    |      |
|        |       | LGQSLDCNAEVVVPWEK                           |    |    | 1.14 | 5.0  | 2    |      |
|        |       | IYPTVNCQPLGMISLMK+Oxidation(15)             |    |    | 2.07 | 4.0  | 2    |      |
|        |       | IYPTVNCQPLGMISLMK                           |    |    | 1.20 | 3.8  | 2    |      |
|        |       | KLQSLDCNAEVVVPWEK                           |    |    | 1.94 | 3.9  | 2    |      |
|        |       | FSVATQTCQITPAEGPVVTAQYDCLGCVHPISTQSPDLEPILR |    |    | 1.24 | 7.0  | 4    |      |
|        |       | ENFLFLTPDCK                                 |    |    | 0.59 | 3.6  | 2    |      |
| P01591 | IGJ   | Immunoglobulin J chain                      | 5  | 12 | 70   | 1.03 | 0.33 | 0.19 |
|        |       | FVYHLSDLCK                                  |    |    | 0.84 | 3.2  | 2    |      |
|        |       | CYTAVVPLVYGGETK                             |    |    | 1.04 | 4.5  | 2    |      |
|        |       | SSEDPNEDIVER                                |    |    | 0.52 | 3.1  | 2    |      |
|        |       | KCDPTEVELDNQIVTATQSNICDEDSATETCYTYDR        |    |    | 0.73 | 6.4  | 3    |      |
|        |       | IVLVDNK                                     |    |    | 0.32 | 1.9  | 1    |      |
| P01613 | KV121 | Ig kappa chain V_I region Ni                | 3  | 26 | 161  | 0.72 | 0.19 | 0.01 |
|        |       | DIQMTQSPSSLSATVGDR+Oxidation(3)             |    |    | 0.71 | 4.1  | 2    |      |
|        |       | DIQMTQSPSSLSATVGDR                          |    |    | 0.72 | 4.3  | 2    |      |
|        |       | LLIYDASNLETGVPSR                            |    |    | 1.58 | 4.3  | 2    |      |
| P01767 | HV306 | Ig heavy chain V_III region BUT             | 3  | 18 | 75   | 0.91 | 0.29 | 0.04 |
|        |       | AEDTAVYYCAR                                 |    |    | 0.88 | 4.3  | 2    |      |
|        |       | EVQLVETGGGLIQPGGSLR                         |    |    | 0.96 | 5.8  | 2    |      |
|        |       | BTVYLQMBSLR                                 |    |    | 0.62 | 2.5  | 2    |      |
| P01779 | HV318 | Ig heavy chain V_III region TUR             | 2  | 16 | 73   | 0.72 | 0.18 | 0.00 |
|        |       | LSCAASGFTFSR                                |    |    | 0.55 | 2.8  | 2    |      |
|        |       | EVQLLES GGGLVQPGGSLR                        |    |    | 0.88 | 5.8  | 2    |      |
| P01781 | HV320 | Ig heavy chain V_III region GAL             | 3  | 4  | 31   | 0.77 | 0.46 | 0.28 |
|        |       | NSLYLQMNSLR                                 |    |    | 0.57 | 3.3  | 2    |      |
|        |       | GLEWVANIK                                   |    |    | 0.86 | 3.3  | 2    |      |
|        |       | VEDTALYYCAR                                 |    |    | 0.67 | 2.9  | 2    |      |
| P01833 | PIGR  | Polymeric immunoglobulin receptor           | 23 | 94 | 905  | 0.76 | 0.10 | 0.00 |
|        |       | ASVDSGSSEEQGGSSR                            |    |    | 1.02 | 5.4  | 2    |      |
|        |       | RAPAFEGR                                    |    |    | 0.69 | 2.4  | 2    |      |
|        |       | AFVNCDENSR                                  |    |    | 0.54 | 3.3  | 2    |      |
|        |       | IIEGEPNLK                                   |    |    | 0.59 | 3.1  | 2    |      |
|        |       | ILLNPQDK                                    |    |    | 0.48 | 2.8  | 2    |      |
|        |       | LSDAGQYLCQAGDSDNSNKK                        |    |    | 0.64 | 5.3  | 2    |      |
|        |       | WNNTGCQALPSQDEGPSK                          |    |    | 0.50 | 5.5  | 2    |      |
|        |       | VYTVDLGR                                    |    |    | 0.62 | 2.3  | 2    |      |
|        |       | LSDAGQYLCQAGDSDNSNK                         |    |    | 0.63 | 5.5  | 2    |      |
|        |       | QSSGENCDVVNTLGK                             |    |    | 0.42 | 4.9  | 2    |      |
|        |       | TVTINCPFK                                   |    |    | 0.73 | 2.6  | 2    |      |
|        |       | GSVTFHCALGPEVANVAK                          |    |    | 0.92 | 5.8  | 2    |      |
|        |       | GVAGGSVAVLCPYNR                             |    |    | 0.52 | 4.5  | 2    |      |
|        |       | GGCITLISSEGYVSSK                            |    |    | 0.67 | 5.5  | 2    |      |
|        |       | QGHFYGETAAVYVAVEER                          |    |    | 0.74 | 4.7  | 2    |      |
|        |       | ADEGWYWCGVK                                 |    |    | 0.77 | 4.0  | 2    |      |
|        |       | NADLQVLKPEPELVYEDLR                         |    |    | 0.76 | 6.6  | 3    |      |
|        |       | LVSLTLNLVTR                                 |    |    | 0.75 | 3.9  | 2    |      |
|        |       | DGSFVITGLR                                  |    |    | 0.81 | 4.4  | 2    |      |
|        |       | ILLNPQDKDGSFVITGLR                          |    |    | 0.78 | 5.0  | 3    |      |



|        |       |                                      |    |     |      |      |      |      |
|--------|-------|--------------------------------------|----|-----|------|------|------|------|
|        |       | SPIFGPEEVNSVEGNSVSITCYYPPTSVNR       |    |     | 1.25 | 6.4  | 3    |      |
|        |       | ILLNPQDKDGSFSVITGLRK                 |    |     | 0.96 | 3.8  | 3    |      |
|        |       | CPLLVDSEGWVK                         |    |     | 1.16 | 3.4  | 2    |      |
| P01834 | IGKC  | Ig kappa chain C region              | 7  | 185 | 1899 | 0.80 | 0.06 | 1.00 |
|        |       | VDNALQSGNSQESVTEQDSK                 |    |     | 0.55 | 6.0  | 2    |      |
|        |       | HKVYACEVTHQGLSSPVTK                  |    |     | 0.87 | 5.5  | 3    |      |
|        |       | VYACEVTHQGLSSPVTK                    |    |     | 0.78 | 5.6  | 2    |      |
|        |       | VDNALQSGNSQESVTEQDSKDYSLSTLTLTK      |    |     | 0.89 | 6.0  | 3    |      |
|        |       | DSTYSLSTLTLTK                        |    |     | 0.99 | 4.3  | 2    |      |
|        |       | TVAAPSVFIFPPSDEQLK                   |    |     | 0.94 | 4.8  | 2    |      |
|        |       | SGTASVCLLNNFYPR                      |    |     | 0.92 | 4.8  | 3    |      |
| P01857 | IGHG1 | Ig gamma_1 chain C region            | 4  | 29  | 308  | 1.11 | 0.20 | 1.00 |
|        |       | GPSVFPLAPSSK                         |    |     | 0.83 | 3.0  | 2    |      |
|        |       | FNWYVDGVEVHNAK                       |    |     | 0.85 | 5.3  | 2    |      |
|        |       | TPEVTCVVDVSHEDPEVK                   |    |     | 0.92 | 5.5  | 2    |      |
|        |       | THTCPPCPAPELLGGPSVFLFPPKPK           |    |     | 1.24 | 6.1  | 3    |      |
| P01859 | IGHG2 | Ig gamma_2 chain C region            | 3  | 11  | 106  | 0.58 | 0.22 | 0.00 |
|        |       | KCCVECPPCPAPPVAGPSVFLFPPKPK          |    |     | 0.71 | 4.4  | 4    |      |
|        |       | VSVLTVVHQDWLNGK                      |    |     | 0.56 | 5.1  | 2    |      |
|        |       | CCVECPPCPAPPVAGPSVFLFPPKPK           |    |     | 0.59 | 5.7  | 3    |      |
| P01860 | IGHG3 | Ig gamma_3 chain C region            | 7  | 38  | 268  | 0.97 | 0.20 | 0.00 |
|        |       | SCDTPPPCPR                           |    |     | 1.17 | 3.0  | 2    |      |
|        |       | WYVDGVEVHNAK                         |    |     | 1.33 | 4.0  | 2    |      |
|        |       | STSGGTAALGCLVK                       |    |     | 0.86 | 4.6  | 2    |      |
|        |       | TPEVTCVVDVSHEDPEVQFK                 |    |     | 1.63 | 5.2  | 3    |      |
|        |       | CPAPELLGGPSVFLFPPKPK                 |    |     | 1.39 | 5.4  | 3    |      |
|        |       | WQQGNIFSCVMHEALHNR                   |    |     | 1.41 | 4.3  | 2    |      |
|        |       | EPQVYTLPPSREEMTK                     |    |     | 0.38 | 3.8  | 2    |      |
| P01861 | IGHG4 | Ig gamma_4 chain C region            | 13 | 50  | 336  | 0.98 | 0.16 | 0.00 |
|        |       | DTLMISR+Oxidation(3)                 |    |     | 0.82 | 2.4  | 2    |      |
|        |       | DTLMISR                              |    |     | 0.72 | 2.3  | 2    |      |
|        |       | STSESTAALGCLVK                       |    |     | 0.64 | 4.6  | 2    |      |
|        |       | EPQVYTLPPSQEEMTK+Oxidation(13)       |    |     | 3.11 | 2.3  | 2    |      |
|        |       | NQVSLTCLVK                           |    |     | 1.69 | 3.3  | 2    |      |
|        |       | VSVLTVLHQDWLNGKEYK                   |    |     | 1.31 | 3.8  | 3    |      |
|        |       | GFYPSDIAVEWESNGQPENNYK               |    |     | 0.74 | 5.4  | 2    |      |
|        |       | VSVLTVLHQDWLNGK                      |    |     | 0.93 | 5.0  | 2    |      |
|        |       | YGPPCPSCPAPEFLGGPSVFLFPPKPK          |    |     | 1.61 | 5.3  | 3    |      |
|        |       | TYTCNVDHKPSNTK                       |    |     | 1.37 | 4.0  | 2    |      |
|        |       | WQEGNVFSCVMHEALHNHYTQK+Oxidation(11) |    |     | 2.38 | 3.6  | 3    |      |
|        |       | EPQVYTLPPSQEEMTK                     |    |     | 3.57 | 2.7  | 2    |      |
|        |       | WQEGNVFSCVMHEALHNHYTQK               |    |     | 3.66 | 3.8  | 3    |      |
| P01871 | IGHM  | Ig mu chain C region                 | 6  | 14  | 83   | 2.12 | 0.95 | 0.30 |
|        |       | QVSGGVTTDQVQAEAK                     |    |     | 1.65 | 4.8  | 2    |      |
|        |       | YAATSQVLLPSK                         |    |     | 1.75 | 3.8  | 2    |      |
|        |       | NVPLPVIAELPPK                        |    |     | 2.87 | 2.4  | 2    |      |
|        |       | DVMQGTDEHVCK                         |    |     | 0.77 | 2.9  | 2    |      |
|        |       | DVMQGTDEHVCK+Oxidation(2)            |    |     | 7.03 | 2.9  | 2    |      |
|        |       | YAATSQVLLPSKDVMQGTDEHVCK             |    |     | 1.97 | 3.7  | 3    |      |
| P01876 | IGHA1 | Ig alpha_1 chain C region            | 7  | 65  | 593  | 0.79 | 0.13 | 0.97 |

|        |       |                                      |    |    |       |      |      |      |
|--------|-------|--------------------------------------|----|----|-------|------|------|------|
|        |       | TFTCTAAYPESK                         |    |    | 0.80  | 3.8  | 2    |      |
|        |       | TPLTATLSK                            |    |    | 0.53  | 2.3  | 2    |      |
|        |       | DASGVTFWTPSSGK                       |    |    | 0.87  | 5.2  | 2    |      |
|        |       | DLCGCYSVSSVLPGCAEPWNHGK              |    |    | 0.94  | 4.6  | 2    |      |
|        |       | NFPPSQDASGDLYTTSSQLTLPATQCLAGK       |    |    | 0.78  | 6.2  | 3    |      |
|        |       | DLCGCYSVSSVLPGCAEPWNHGKFTFTCTAAYPESK |    |    | 0.72  | 4.0  | 4    |      |
|        |       | LAGKPTHVNVSVVMAEVDGTCY               |    |    | 0.85  | 3.7  | 3    |      |
| P01877 | IGHA2 | Ig alpha_2 chain C region            | 12 | 75 | 642   | 0.76 | 0.11 | 0.00 |
|        |       | SAVQGPPER                            |    |    | 0.60  | 2.5  | 2    |      |
|        |       | YLTWASR                              |    |    | 0.72  | 2.6  | 2    |      |
|        |       | WLQGSQELPR                           |    |    | 0.77  | 3.8  | 2    |      |
|        |       | DASGATFTWTPSSGK                      |    |    | 0.76  | 4.8  | 2    |      |
|        |       | KGDTFSCMGHEALPLAFTQK+Oxidation(7)    |    |    | 0.63  | 4.8  | 3    |      |
|        |       | KGDTFSCMGHEALPLAFTQK                 |    |    | 0.80  | 5.5  | 3    |      |
|        |       | GDTFSCMGHEALPLAFTQK+Oxidation(6)     |    |    | 0.67  | 3.2  | 2    |      |
|        |       | QEPSQGTTFVAVTSILR                    |    |    | 0.78  | 4.6  | 3    |      |
|        |       | NFPPSQDASGDLYTTSSQLTLPATQCPDGK       |    |    | 0.79  | 6.0  | 3    |      |
|        |       | DLCGCYSVSSVLPGCAQPWNHGETFTCTAAHPELK  |    |    | 0.83  | 5.1  | 3    |      |
|        |       | GDTFSCMGHEALPLAFTQK                  |    |    | 0.99  | 4.4  | 2    |      |
|        |       | HYTNPSQDVTVPCPVPPPPPCCHPR            |    |    | 0.55  | 5.3  | 3    |      |
| P01880 | IGHD  | Ig delta chain C region              | 3  | 7  | 12    | 1.41 | 0.26 | 0.25 |
|        |       | DSYYMTSSQLSTPLQQWR                   |    |    | 3.81  | 4.2  | 2    |      |
|        |       | DAHLTWEVAGK                          |    |    | 0.14  | 3.4  | 2    |      |
|        |       | DSYYMTSSQLSTPLQQWR+Oxidation(4)      |    |    | 0.36  | 5.1  | 2    |      |
| P02042 | HBD   | Hemoglobin subunit delta             | 12 | 53 | 261   | 1.19 | 0.09 | 1.00 |
|        |       | VVAGVANALAHK                         |    |    | 0.76  | 3.8  | 2    |      |
|        |       | LHVDPENFR                            |    |    | 0.57  | 2.5  | 2    |      |
|        |       | EFTPQMQAAYQK                         |    |    | 0.46  | 2.8  | 2    |      |
|        |       | VNVDAVGGEALGR                        |    |    | 0.64  | 4.6  | 2    |      |
|        |       | TAVNALWGK                            |    |    | 0.78  | 3.2  | 2    |      |
|        |       | KVLGAFSDGLAHLNLIK                    |    |    | 1.29  | 6.0  | 3    |      |
|        |       | VLGAFSDGLAHLNLIK                     |    |    | 1.02  | 5.0  | 2    |      |
|        |       | FFESFGDLSSPDAVMGNPK+Oxidation(14)    |    |    | 0.99  | 4.2  | 2    |      |
|        |       | FFESFGDLSSPDAVMGNPK                  |    |    | 1.02  | 4.5  | 2    |      |
|        |       | GTFSQLSELHCDK                        |    |    | 0.41  | 3.2  | 2    |      |
|        |       | LLGNVLCVLAR                          |    |    | 0.43  | 2.8  | 2    |      |
|        |       | EFTPQMQAAYQK+Oxidation(5)            |    |    | 0.53  | 2.6  | 2    |      |
| P02545 | LMNA  | Prelamin_A/C                         | 7  | 7  | 8     | 0.57 | 2.06 | 0.47 |
|        |       | AAYEAE LGDAR                         |    |    | 0.56  | 2.8  | 2    |      |
|        |       | VAVEEVDEEGK                          |    |    | 4.69  | 2.7  | 2    |      |
|        |       | SLETENAGLR                           |    |    | 2.21  | 2.4  | 2    |      |
|        |       | AQNTWGCNSLR                          |    |    | 24.20 | 2.5  | 2    |      |
|        |       | LQEKEDLQELNDR                        |    |    | 6.06  | 3.9  | 2    |      |
|        |       | NSNLVGAHEELQQR                       |    |    | 3.81  | 3.7  | 2    |      |
|        |       | ASASGSGAQVGGPISSGSSASSVTVTR          |    |    | 9.29  | 5.3  | 2    |      |
| P02647 | APOA1 | Apolipoprotein A_I                   | 18 | 64 | 449   | 2.13 | 0.28 | 0.00 |
|        |       | ATEHLSTLSEK                          |    |    | 1.29  | 3.6  | 3    |      |
|        |       | AKPALEDLR                            |    |    | 1.43  | 2.3  | 2    |      |
|        |       | LSPLGEEMR+Oxidation(7)               |    |    | 1.77  | 2.5  | 2    |      |
|        |       | THLAPYSDELRL                         |    |    | 1.65  | 3.1  | 2    |      |

|        |       |                                             |    |    |      |      |      |      |
|--------|-------|---------------------------------------------|----|----|------|------|------|------|
|        |       | WQEEMELYR+Oxidation(4)                      |    |    | 1.28 | 2.6  | 2    |      |
|        |       | LSPLGEEMR                                   |    |    | 0.73 | 2.7  | 2    |      |
|        |       | VQPYLDDFQK                                  |    |    | 1.11 | 2.6  | 2    |      |
|        |       | DSGRDYVSQFEGSALGK                           |    |    | 3.73 | 4.8  | 2    |      |
|        |       | VKDLATVYVDVLK                               |    |    | 2.83 | 4.4  | 2    |      |
|        |       | DYVSQFEGSALGK                               |    |    | 2.34 | 4.7  | 2    |      |
|        |       | LLDNWDSVTSTFSK                              |    |    | 1.66 | 4.6  | 2    |      |
|        |       | DLATVYVDVLK                                 |    |    | 2.54 | 3.8  | 2    |      |
|        |       | QGLLPVLESFK                                 |    |    | 2.28 | 2.9  | 2    |      |
|        |       | VSFLSALEEYTK                                |    |    | 2.68 | 4.4  | 2    |      |
|        |       | ETEGLRQEMSK                                 |    |    | 0.85 | 2.6  | 2    |      |
|        |       | WQEEMELYR                                   |    |    | 1.45 | 2.6  | 2    |      |
|        |       | LREQLGPVTQEFWDNLEK                          |    |    | 0.72 | 4.7  | 3    |      |
|        |       | LREQLGPVTQEFWDNLEKETEGLR                    |    |    | 1.84 | 4.4  | 3    |      |
| P02649 | APOE  | Apolipoprotein E                            | 7  | 13 | 54   | 0.90 | 0.40 | 1.00 |
|        |       | AKLEEQAQQIR                                 |    |    | 0.71 | 3.6  | 3    |      |
|        |       | VQAAVGTSAAPVPSDNH                           |    |    | 0.96 | 5.3  | 2    |      |
|        |       | SELEEQLTPVAEETR                             |    |    | 0.87 | 4.8  | 2    |      |
|        |       | WVQTLSEVQVEELLSSQVTQELR                     |    |    | 0.87 | 4.4  | 3    |      |
|        |       | AATVGSAGQPLQER                              |    |    | 1.07 | 3.2  | 2    |      |
|        |       | SWFEPLVEDMQR                                |    |    | 1.36 | 2.5  | 2    |      |
|        |       | LGADMEDVCGR                                 |    |    | 0.71 | 2.6  | 2    |      |
| P02652 | APOA2 | Apolipoprotein A_II                         | 4  | 11 | 54   | 1.43 | 0.95 | 0.17 |
|        |       | VKSPELQAEAK                                 |    |    | 1.43 | 4.1  | 3    |      |
|        |       | SPELQAEAK                                   |    |    | 3.35 | 3.5  | 2    |      |
|        |       | SKEQLTPLIK                                  |    |    | 1.43 | 3.0  | 2    |      |
|        |       | EPCVESLSVQYFQTVTDYGK                        |    |    | 2.10 | 4.7  | 2    |      |
| P02654 | APOC1 | Apolipoprotein C_I                          | 2  | 2  | 14   | 1.30 | 1.29 | 0.79 |
|        |       | LKEFGNTLEDK                                 |    |    | 1.30 | 2.7  | 2    |      |
|        |       | EWFSETFQK                                   |    |    | 1.46 | 2.5  | 1    |      |
| P02656 | APOC3 | Apolipoprotein C_III                        | 2  | 5  | 44   | 4.24 | 3.13 | 0.00 |
|        |       | DALSSVQESQVAQQAR                            |    |    | 1.71 | 4.6  | 2    |      |
|        |       | GWVTDGFSSLK                                 |    |    | 4.29 | 3.3  | 2    |      |
| P02671 | FIBA  | Fibrinogen alpha chain                      | 16 | 32 | 166  | 2.78 | 0.52 | 0.00 |
|        |       | GGSTSYGTGSETESPR                            |    |    | 1.46 | 4.3  | 2    |      |
|        |       | NPSSAGSWNSGSSGPGSTGNR                       |    |    | 1.74 | 5.6  | 2    |      |
|        |       | ESSSHHPGIAEFPSR                             |    |    | 1.57 | 3.5  | 3    |      |
|        |       | GSESGIFTNTK                                 |    |    | 3.23 | 3.6  | 2    |      |
|        |       | HRHPDEAAFFDTASTGK                           |    |    | 0.88 | 5.1  | 3    |      |
|        |       | VQHIQLLQK                                   |    |    | 1.04 | 2.7  | 2    |      |
|        |       | EVDLKDYEDQK                                 |    |    | 1.71 | 3.4  | 2    |      |
|        |       | RLEVDIDIK                                   |    |    | 2.60 | 2.6  | 2    |      |
|        |       | GLIDEVNQDFTNR                               |    |    | 5.14 | 3.6  | 2    |      |
|        |       | DSHSLTTNIMEILR                              |    |    | 6.53 | 4.5  | 2    |      |
|        |       | NSLFEYQK                                    |    |    | 2.41 | 2.7  | 2    |      |
|        |       | HPDEAAFFDTASTGK                             |    |    | 2.43 | 3.1  | 2    |      |
|        |       | LEVDIDIK                                    |    |    | 4.20 | 2.5  | 2    |      |
|        |       | DSHSLTTNIMEILR+Oxidation(9)                 |    |    | 4.74 | 2.4  | 2    |      |
|        |       | EVTSEDGSDCPEAMDGLTSLGIGTLDGFR+Oxidation(14) |    |    | 3.27 | 5.5  | 3    |      |
|        |       | EVTSEDGSDCPEAMDGLTSLGIGTLDGFR               |    |    | 4.48 | 4.9  | 3    |      |

|        |      |                                       |    |    |      |      |      |      |
|--------|------|---------------------------------------|----|----|------|------|------|------|
| P02675 | FIBB | Fibrinogen beta chain                 | 21 | 61 | 309  | 3.17 | 0.40 | 0.00 |
|        |      | AHYGGFTVQNEANK                        |    |    | 1.68 | 4.8  | 2    |      |
|        |      | QGFQNVATNTDGK                         |    |    | 2.12 | 3.1  | 2    |      |
|        |      | LESDVSAQMEYCR+Oxidation(8)            |    |    | 1.15 | 4.5  | 2    |      |
|        |      | LESDVSAQMEYCR                         |    |    | 1.90 | 4.1  | 2    |      |
|        |      | REEAPSLRPAPPPISGGGYR                  |    |    | 2.65 | 3.7  | 3    |      |
|        |      | TPCTVSCNIPVVSGK                       |    |    | 2.01 | 3.8  | 2    |      |
|        |      | GGETSEMYLIQPDSSVKPYR                  |    |    | 2.31 | 4.9  | 2    |      |
|        |      | DNENVVNEYSSELEK                       |    |    | 3.07 | 5.4  | 2    |      |
|        |      | HQLYIDETVNSNIPTNLR                    |    |    | 3.72 | 5.2  | 2    |      |
|        |      | VYCDMNTENGGWTVIQNR                    |    |    | 3.95 | 5.2  | 2    |      |
|        |      | NYCGLPGEYWLGN DK                      |    |    | 5.96 | 4.2  | 2    |      |
|        |      | EDGGGWYNR                             |    |    | 4.88 | 3.0  | 2    |      |
|        |      | YQISV NK                              |    |    | 2.36 | 1.9  | 1    |      |
|        |      | EEAPSLRPAPPPISGGGYR                   |    |    | 1.83 | 3.9  | 3    |      |
|        |      | KGGETSEMYLIQPDSSVKPYR                 |    |    | 2.57 | 5.6  | 3    |      |
|        |      | HGTDDGVVWMNWK+Oxidation(9)            |    |    | 2.55 | 3.1  | 2    |      |
|        |      | GGETSEMYLIQPDSSVKPYR+Oxidation(6)     |    |    | 3.68 | 3.6  | 3    |      |
|        |      | VYCDMNTENGGWTVIQNR+Oxidation(4)       |    |    | 4.81 | 4.8  | 2    |      |
|        |      | HGTDDGVVWMNWK                         |    |    | 2.27 | 4.2  | 2    |      |
|        |      | YYWGGQYTWDMAK+Oxidation(10)           |    |    | 3.69 | 2.3  | 2    |      |
|        |      | DNDGWLTSDPR                           |    |    | 0.61 | 2.7  | 2    |      |
| P02679 | FIBG | Fibrinogen gamma chain                | 16 | 32 | 164  | 2.74 | 0.91 | 0.00 |
|        |      | CHAGHLNGVYYQGGTYSK                    |    |    | 3.52 | 4.8  | 2    |      |
|        |      | RLDGSVDFK                             |    |    | 2.04 | 2.3  | 2    |      |
|        |      | YLQEIYNSNNQK                          |    |    | 2.24 | 5.3  | 2    |      |
|        |      | YEASILTHDSSIR                         |    |    | 2.14 | 3.9  | 2    |      |
|        |      | TSTADYAMFK                            |    |    | 2.14 | 3.1  | 2    |      |
|        |      | VELEDWNGR                             |    |    | 2.08 | 3.0  | 2    |      |
|        |      | AIQLTYNPDESSKPNMIDAATLK               |    |    | 2.65 | 3.9  | 2    |      |
|        |      | ASTPNGYDNGI IWATWK                    |    |    | 3.42 | 4.3  | 2    |      |
|        |      | QSGLYFIKPLK                           |    |    | 7.97 | 2.5  | 2    |      |
|        |      | IHLISTQSAIPYALR                       |    |    | 3.27 | 4.5  | 2    |      |
|        |      | VGPEADKYR                             |    |    | 1.32 | 2.4  | 2    |      |
|        |      | VAQLEAQCQEPCCK                        |    |    | 1.65 | 4.1  | 2    |      |
|        |      | TSTADYAMFK+Oxidation(7)               |    |    | 3.02 | 2.5  | 2    |      |
|        |      | LDGSVDFK                              |    |    | 2.28 | 1.9  | 1    |      |
|        |      | DNCCILDER                             |    |    | 5.54 | 3.0  | 2    |      |
|        |      | VAQLEAQCQEPCCKDTVQIHDITGK             |    |    | 2.58 | 4.6  | 3    |      |
| P02743 | SAMP | Serum amyloid P_component             | 3  | 4  | 23   | 8.23 | 0.95 | 0.00 |
|        |      | IVLGQEQDSYGGK                         |    |    | 8.57 | 3.7  | 2    |      |
|        |      | GYVIKPLVWV                            |    |    | 7.19 | 2.6  | 2    |      |
|        |      | AYSLFSYNTQGR                          |    |    | 0.99 | 3.4  | 2    |      |
| P02746 | C1QB | Complement C1q subcomponent subunit B | 3  | 4  | 21   | 0.68 | 0.34 | 0.06 |
|        |      | LEQGENVFLQATDK                        |    |    | 0.26 | 4.4  | 2    |      |
|        |      | GPMGPKGGPGAPGAPGPK                    |    |    | 1.04 | 2.6  | 2    |      |
|        |      | FDHVITNMNNNYEPR                       |    |    | 0.62 | 3.7  | 2    |      |
| P02747 | C1QC | Complement C1q subcomponent subunit C | 3  | 4  | 25   | 0.32 | 0.25 | 0.00 |
|        |      | TNQVNSGGVLLR                          |    |    | 0.38 | 3.0  | 2    |      |
|        |      | FNAVL TNPQGDYDTSTGK                   |    |    | 0.29 | 5.1  | 2    |      |

|        |      |                                   |    |    |      |      |      |      |
|--------|------|-----------------------------------|----|----|------|------|------|------|
|        |      | FQSFTVTR                          |    |    | 0.37 | 2.3  | 2    |      |
| P02748 | CO9  | Complement component C9           | 6  | 6  | 36   | 0.88 | 0.37 | 0.71 |
|        |      | VVEEELAR                          |    |    | 1.67 | 2.5  | 2    |      |
|        |      | SIEVFGQFNGK                       |    |    | 1.10 | 3.2  | 2    |      |
|        |      | LSPIYNLVPVK                       |    |    | 0.88 | 2.9  | 2    |      |
|        |      | TEHYEEQIEAFK                      |    |    | 0.87 | 3.3  | 2    |      |
|        |      | QCVPTPECEDAEDDCGNDFQCSTGR         |    |    | 0.65 | 4.4  | 3    |      |
|        |      | DRVVEEELAR                        |    |    | 1.13 | 2.5  | 2    |      |
| P02749 | APOH | Beta_2_glycoprotein 1             | 12 | 33 | 212  | 0.97 | 0.17 | 0.16 |
|        |      | ATVVYQGER                         |    |    | 0.76 | 2.9  | 2    |      |
|        |      | KCSYTEDAQCIDGTIEVPK               |    |    | 0.97 | 4.5  | 3    |      |
|        |      | ATFGCHDGYSLDGPEEIECTK             |    |    | 1.08 | 5.2  | 3    |      |
|        |      | TFYEPGEEITYSCKPGYVSR              |    |    | 0.85 | 4.8  | 2    |      |
|        |      | CSYTEDAQCIDGTIEVPK                |    |    | 1.00 | 4.9  | 2    |      |
|        |      | TCPKPDDLPFSTVVPLK                 |    |    | 0.99 | 4.4  | 3    |      |
|        |      | VCPFAGILENGAVR                    |    |    | 1.05 | 4.3  | 2    |      |
|        |      | FICPLTGLWPINTLK                   |    |    | 0.81 | 4.7  | 2    |      |
|        |      | KATVVYQGER                        |    |    | 0.72 | 3.0  | 2    |      |
|        |      | WSPPELVCAPICPPPSIPTFATLR          |    |    | 0.94 | 3.5  | 3    |      |
|        |      | TDASDVKPC                         |    |    | 0.54 | 2.5  | 2    |      |
|        |      | DKATFGCHDGYSLDGPEEIECTK           |    |    | 0.71 | 4.3  | 3    |      |
| P02750 | A2GL | Leucine_rich alpha_2_glycoprotein | 6  | 16 | 54   | 1.11 | 0.25 | 1.00 |
|        |      | ALGHLDSLGNR                       |    |    | 1.02 | 2.3  | 2    |      |
|        |      | DLLLPQDLR                         |    |    | 0.96 | 2.4  | 2    |      |
|        |      | TLDLGENQLETLPPDLLR                |    |    | 1.12 | 4.6  | 2    |      |
|        |      | DGFDISGNPWICDQNLSDLYR             |    |    | 1.04 | 5.0  | 3    |      |
|        |      | LQELHLSSNGLESLSPEFLRPVQLR         |    |    | 1.14 | 5.1  | 3    |      |
|        |      | VAAGAFQGLR                        |    |    | 1.26 | 2.4  | 2    |      |
| P02751 | FINC | Fibronectin                       | 41 | 91 | 436  | 0.39 | 0.07 | 0.00 |
|        |      | LGVRPSQGGEAPR                     |    |    | 0.28 | 4.1  | 3    |      |
|        |      | TYHVGEQWQK                        |    |    | 0.42 | 3.9  | 3    |      |
|        |      | WCGTTQNYDADQK                     |    |    | 0.54 | 4.3  | 2    |      |
|        |      | TFYSCTTEGR                        |    |    | 0.40 | 2.8  | 2    |      |
|        |      | RPGGEPSPGTTGQSYNQYSQR             |    |    | 0.49 | 5.3  | 3    |      |
|        |      | HYQINQQWER                        |    |    | 0.47 | 3.8  | 3    |      |
|        |      | HTSVQTTSSGSGPFTDVR                |    |    | 0.40 | 5.4  | 2    |      |
|        |      | GFNCESKPEAEETCFDK                 |    |    | 0.42 | 4.3  | 3    |      |
|        |      | GDSPASSKPISINYR                   |    |    | 0.39 | 3.7  | 2    |      |
|        |      | SYTITGLQPGTDYK                    |    |    | 0.51 | 4.5  | 2    |      |
|        |      | YEVSVYALK                         |    |    | 0.47 | 2.4  | 2    |      |
|        |      | GNLLQCICTGNR                      |    |    | 0.46 | 3.3  | 2    |      |
|        |      | WLPSSSPVTGYR                      |    |    | 0.46 | 2.8  | 2    |      |
|        |      | TYLGNALVCTCYGGSR                  |    |    | 0.63 | 5.0  | 2    |      |
|        |      | GEWTCIAYSQLR                      |    |    | 0.59 | 3.3  | 2    |      |
|        |      | EESPLLIGQQSTVSDVPR                |    |    | 0.53 | 3.9  | 2    |      |
|        |      | FGFCPMAAHEEICTTNEGVMYR            |    |    | 0.48 | 3.7  | 3    |      |
|        |      | TETITGFQVDAVPANGQTPIQR            |    |    | 0.21 | 4.5  | 2    |      |
|        |      | DLQFVEVTDVK                       |    |    | 0.52 | 3.7  | 2    |      |
|        |      | GLAFTDVEDVDSIK                    |    |    | 0.58 | 3.5  | 2    |      |
|        |      | NTFAEVTGLSPGVTYFFK                |    |    | 0.71 | 3.7  | 2    |      |

|        |       |                                    |    |    |      |      |      |      |
|--------|-------|------------------------------------|----|----|------|------|------|------|
|        |       | FTQVTPTSLSAQWTPPNVQLTGYR           |    |    | 0.54 | 5.5  | 2    |      |
|        |       | EINLAPDSSSVVSGLMVATK               |    |    | 0.63 | 4.3  | 2    |      |
|        |       | WSRPQAPITGYR                       |    |    | 0.49 | 3.8  | 3    |      |
|        |       | SSPVVIDASTAIDAPSNLR                |    |    | 0.43 | 5.3  | 2    |      |
|        |       | AAVYQPQHPQPPPYGHCVTDSGVVYSVGMQWLK  |    |    | 0.65 | 4.2  | 4    |      |
|        |       | QDGHLCSTTSNYEQDQK                  |    |    | 0.38 | 4.8  | 3    |      |
|        |       | TEIDKPSQMQRVTDVQDNSISVK            |    |    | 0.49 | 5.0  | 3    |      |
|        |       | EYLGAICTCFGGQR                     |    |    | 0.46 | 4.4  | 2    |      |
|        |       | ITYGETGGNSPVQEFTVPGSK              |    |    | 0.51 | 4.6  | 2    |      |
|        |       | VTDATETTITISWR                     |    |    | 0.52 | 3.1  | 2    |      |
|        |       | VTIMWTPPESAVTGYR                   |    |    | 0.59 | 3.1  | 2    |      |
|        |       | VEYELSEEGDEPQYLDLPSTATSVNIPDLLPGRK |    |    | 0.55 | 6.5  | 3    |      |
|        |       | VPGTSTSATLTGLTR                    |    |    | 0.59 | 3.0  | 2    |      |
|        |       | YSFCTDHTVLVQTR                     |    |    | 0.45 | 4.1  | 2    |      |
|        |       | TKTETITGFQVDAVPANGQTIQR            |    |    | 0.53 | 5.4  | 2    |      |
|        |       | TNTNVNCPICFMPLDVQADREDSRE          |    |    | 2.47 | 3.5  | 3    |      |
|        |       | FLATTPNSLLVSWQPPR                  |    |    | 0.85 | 3.2  | 2    |      |
|        |       | NSITLTNLTPGTEYVVSIVALNGR           |    |    | 1.03 | 4.2  | 3    |      |
|        |       | TNTNVNCPICFMPLDVQADR               |    |    | 0.65 | 3.2  | 2    |      |
|        |       | EINLAPDSSSVVSGLMVATK+Oxidation(16) |    |    | 0.96 | 2.8  | 2    |      |
| P02760 | AMBP  | Protein AMBP                       | 11 | 13 | 99   | 0.79 | 0.25 | 0.00 |
|        |       | KGVCETSGAYEK                       |    |    | 0.62 | 4.0  | 2    |      |
|        |       | GVCEETSGAYEK                       |    |    | 0.72 | 3.8  | 2    |      |
|        |       | TVAACNLPIVR                        |    |    | 0.69 | 3.5  | 2    |      |
|        |       | CVLFPYGGCQGNNGK                    |    |    | 1.32 | 2.6  | 2    |      |
|        |       | EYCGVPGDGDEELLR                    |    |    | 0.97 | 3.0  | 2    |      |
|        |       | VVAQGVGIPEDSIFTMADR+Oxidation(15)  |    |    | 1.24 | 2.3  | 2    |      |
|        |       | VVAQGVGIPEDSIFTMADR                |    |    | 0.81 | 2.8  | 2    |      |
|        |       | WYNLAIGSTCPWLK                     |    |    | 0.90 | 4.1  | 2    |      |
|        |       | KEDSCQLGYSAGPCMGMTSR               |    |    | 1.42 | 3.7  | 3    |      |
|        |       | EDSCQLGYSAGPCMGMTSR                |    |    | 0.66 | 3.8  | 2    |      |
|        |       | GECVPGEQEPEPILIPR                  |    |    | 0.76 | 3.5  | 2    |      |
| P02763 | A1AG1 | Alpha_1_acid glycoprotein 1        | 4  | 10 | 104  | 0.88 | 0.33 | 0.69 |
|        |       | SDVVYTDWKK                         |    |    | 0.78 | 2.8  | 2    |      |
|        |       | SDVVYTDWK                          |    |    | 0.77 | 3.4  | 2    |      |
|        |       | NWGLSVYADKPETTK                    |    |    | 0.72 | 4.4  | 2    |      |
|        |       | YVGGQEHFAHLLILR                    |    |    | 1.01 | 4.8  | 2    |      |
| P02765 | FETUA | Alpha_2_HS_glycoprotein            | 9  | 28 | 230  | 1.01 | 0.27 | 0.00 |
|        |       | CDSSPDSAEDVR                       |    |    | 0.63 | 3.2  | 2    |      |
|        |       | HTLNQIDEVK                         |    |    | 1.89 | 3.9  | 2    |      |
|        |       | FSVYAK                             |    |    | 0.97 | 1.9  | 1    |      |
|        |       | HTFMGVVSLGSPSGEVSHPR+Oxidation(3)  |    |    | 2.95 | 4.6  | 3    |      |
|        |       | EHAVEGDCDFQLLK                     |    |    | 0.93 | 4.3  | 2    |      |
|        |       | HTFMGVVSLGSPSGEVSHPR               |    |    | 4.81 | 5.6  | 2    |      |
|        |       | TVVQPSVGAAGPVVPPCPGR               |    |    | 1.78 | 4.3  | 2    |      |
|        |       | AQLVPLPPSTYVEFTVSGTDCVAK           |    |    | 0.81 | 4.5  | 3    |      |
|        |       | CDSSPDSAEDVRK                      |    |    | 0.67 | 3.0  | 2    |      |
| P02766 | TTHY  | Transthyretin                      | 9  | 31 | 244  | 0.77 | 0.15 | 0.00 |
|        |       | GSPAINVAHVFR                       |    |    | 0.85 | 4.1  | 2    |      |
|        |       | AADDTWEPFASGK                      |    |    | 0.80 | 4.4  | 2    |      |

|        |      |                                      |    |      |       |      |      |      |
|--------|------|--------------------------------------|----|------|-------|------|------|------|
|        |      | ALGISPFHEHAEVVFTANDSGPR              |    |      | 0.72  | 5.4  | 2    |      |
|        |      | RYTIAALLSPYSYSTTAVVTNPKE             |    |      | 1.01  | 5.0  | 2    |      |
|        |      | RYTIAALLSPYSYSTTAVVTNPKE             |    |      | 1.20  | 4.6  | 2    |      |
|        |      | YTIAALLSPYSYSTTAVVTNPKE              |    |      | 0.86  | 5.0  | 2    |      |
|        |      | YTIAALLSPYSYSTTAVVTNPKE              |    |      | 0.96  | 5.7  | 2    |      |
|        |      | TSESGELHGLTTEEEFVEGIYK               |    |      | 0.84  | 4.3  | 2    |      |
|        |      | KAADDTWEPFASGK                       |    |      | 1.00  | 3.1  | 2    |      |
| P02768 | ALBU | Serum albumin                        | 68 | 1066 | 13265 | 0.88 | 0.02 | 0.00 |
|        |      | NYAEAK                               |    |      | 0.77  | 2.3  | 1    |      |
|        |      | ADDKETCFAEEGKK                       |    |      | 0.91  | 5.3  | 3    |      |
|        |      | LDELRDEGKASSAK                       |    |      | 0.68  | 2.7  | 2    |      |
|        |      | TCVADESAENCDK                        |    |      | 0.82  | 4.8  | 2    |      |
|        |      | CCAAADPHECYAK                        |    |      | 0.75  | 4.8  | 2    |      |
|        |      | LDELRDEGK                            |    |      | 0.77  | 2.8  | 2    |      |
|        |      | ETYGEMADCCAK+Oxidation(5)            |    |      | 0.91  | 3.4  | 2    |      |
|        |      | ADDKETCFAEEGK                        |    |      | 0.85  | 4.1  | 3    |      |
|        |      | QEPERNECFLQHK                        |    |      | 0.54  | 2.8  | 2    |      |
|        |      | LKECCEKPLLEK                         |    |      | 0.69  | 4.6  | 2    |      |
|        |      | ECCEKPLLEK                           |    |      | 0.73  | 2.7  | 2    |      |
|        |      | AAFTECCQAADK                         |    |      | 0.66  | 4.1  | 2    |      |
|        |      | TYETTLEK                             |    |      | 0.80  | 2.6  | 2    |      |
|        |      | CCTESLVNR                            |    |      | 0.70  | 3.4  | 2    |      |
|        |      | AEFAEVSK                             |    |      | 0.84  | 2.8  | 2    |      |
|        |      | DDNPNLPR                             |    |      | 0.86  | 2.7  | 2    |      |
|        |      | LAKTYETTLEK                          |    |      | 0.75  | 2.4  | 2    |      |
|        |      | YICENQDSISSK                         |    |      | 0.85  | 4.4  | 2    |      |
|        |      | YKAAFTECCQAADK                       |    |      | 1.17  | 4.4  | 2    |      |
|        |      | ETYGEMADCCAK                         |    |      | 0.60  | 3.9  | 2    |      |
|        |      | VHTECCHGDLLECADDR                    |    |      | 0.95  | 6.6  | 2    |      |
|        |      | ACLLEPK                              |    |      | 0.90  | 2.7  | 2    |      |
|        |      | LVTDLTK                              |    |      | 0.79  | 2.4  | 2    |      |
|        |      | QEPERNECFLQHKDDNPNLPR                |    |      | 0.92  | 3.7  | 3    |      |
|        |      | FKDLGEENFK                           |    |      | 1.03  | 4.4  | 3    |      |
|        |      | DLGEENFK                             |    |      | 0.80  | 3.2  | 2    |      |
|        |      | NECFLQHKDDNPNLPR                     |    |      | 0.93  | 4.7  | 2    |      |
|        |      | LCTVATLR                             |    |      | 0.73  | 2.4  | 2    |      |
|        |      | KYLYEIAR                             |    |      | 0.90  | 3.3  | 2    |      |
|        |      | YLYEIAR                              |    |      | 0.88  | 3.2  | 2    |      |
|        |      | SLHTLFGDK                            |    |      | 1.06  | 2.8  | 1    |      |
|        |      | VHTECCHGDLLECADDRADLAK               |    |      | 0.87  | 5.7  | 3    |      |
|        |      | KQTALVELVK                           |    |      | 0.83  | 5.1  | 3    |      |
|        |      | QTALVELVK                            |    |      | 1.05  | 2.0  | 1    |      |
|        |      | FQNALLVR                             |    |      | 0.87  | 3.1  | 2    |      |
|        |      | KVPQVSTPTLVEVSR                      |    |      | 0.83  | 5.5  | 3    |      |
|        |      | LVNEVTEFAK                           |    |      | 0.90  | 3.8  | 2    |      |
|        |      | VPQVSTPTLVEVSR                       |    |      | 1.22  | 3.8  | 3    |      |
|        |      | LVRPEVDVMCTAFHDNEETFLKK+Oxidation(8) |    |      | 0.84  | 5.2  | 3    |      |
|        |      | KLVAASQAALGL                         |    |      | 0.78  | 3.7  | 2    |      |
|        |      | RHPDYSVLLLR                          |    |      | 1.17  | 5.1  | 3    |      |
|        |      | RPCFSALEVDETYVPK                     |    |      | 1.26  | 4.1  | 3    |      |

|        |      |                                           |    |    |      |      |      |      |
|--------|------|-------------------------------------------|----|----|------|------|------|------|
|        |      | LVRPEVDVMCTAFHDNEETFLK+Oxidation(8)       |    |    | 0.71 | 5.5  | 3    |      |
|        |      | LVRPEVDVMCTAFHDNEETFLKK                   |    |    | 0.89 | 6.7  | 3    |      |
|        |      | LVRPEVDVMCTAFHDNEETFLK                    |    |    | 0.83 | 6.6  | 3    |      |
|        |      | QNCLEFEQLGEYK                             |    |    | 0.92 | 4.5  | 2    |      |
|        |      | AVMDDFAAFVEK+Oxidation(2)                 |    |    | 0.78 | 4.1  | 2    |      |
|        |      | HPDYSVLLLLR                               |    |    | 1.79 | 2.6  | 2    |      |
|        |      | LVAASQAALGL                               |    |    | 0.82 | 4.1  | 2    |      |
|        |      | SHCIAEVENDEMPADLPSLAADFVESK+Oxidation(11) |    |    | 0.88 | 6.0  | 3    |      |
|        |      | EFNAETFFHADICTLSEK                        |    |    | 1.06 | 6.0  | 2    |      |
|        |      | VFDEFKPLVEEPQNLK                          |    |    | 1.17 | 5.4  | 3    |      |
|        |      | RHPYFYAPPELLFFAK                          |    |    | 1.43 | 4.2  | 3    |      |
|        |      | SHCIAEVENDEMPADLPSLAADFVESK               |    |    | 0.91 | 5.2  | 3    |      |
|        |      | AVMDDFAAFVEK                              |    |    | 1.12 | 4.0  | 2    |      |
|        |      | AEFAEVSKLVDTLTK                           |    |    | 1.12 | 4.4  | 2    |      |
|        |      | MPCAEDYLSVVLNQLCVLHEKTPVSDR+Oxidation(0)  |    |    | 0.61 | 4.3  | 4    |      |
|        |      | NYAEAKDVFLGMFLYEYAR                       |    |    | 0.97 | 3.1  | 2    |      |
|        |      | MPCAEDYLSVVLNQLCVLHEKTPVSDR               |    |    | 0.89 | 4.5  | 4    |      |
|        |      | DVFLGMFLYEYAR+Oxidation(5)                |    |    | 0.84 | 4.4  | 2    |      |
|        |      | ALVLIAFAQYLQQCPFEDHVK                     |    |    | 1.25 | 5.9  | 4    |      |
|        |      | FKDLGEENFKALVLIAFAQYLQQCPFEDHVK           |    |    | 0.80 | 6.5  | 4    |      |
|        |      | DVFLGMFLYEYAR                             |    |    | 1.54 | 4.4  | 2    |      |
|        |      | SLHTLFGDKLCTVATLR                         |    |    | 1.26 | 3.9  | 4    |      |
|        |      | QNCLEFEQLGEYKFNALLVR                      |    |    | 1.64 | 3.5  | 3    |      |
|        |      | MPCAEDYLSVVLNQLCVLHEK+Oxidation(0)        |    |    | 1.54 | 5.1  | 3    |      |
|        |      | MPCAEDYLSVVLNQLCVLHEK                     |    |    | 2.19 | 4.7  | 3    |      |
|        |      | RYKAAFTECCQAADK                           |    |    | 0.46 | 2.6  | 2    |      |
| P02774 | VTDB | Vitamin D_binding protein                 | 21 | 74 | 508  | 1.24 | 0.14 | 0.93 |
|        |      | CCESASEDCMAK+Oxidation(9)                 |    |    | 1.11 | 3.8  | 2    |      |
|        |      | VCSQYAAAYGEK                              |    |    | 0.86 | 3.4  | 2    |      |
|        |      | SCESNSPFPVHPGTAECCCK                      |    |    | 0.91 | 5.3  | 2    |      |
|        |      | RTHLPEVFLSK                               |    |    | 0.78 | 4.2  | 3    |      |
|        |      | ELSSFIDK                                  |    |    | 0.71 | 2.3  | 1    |      |
|        |      | YTFELSR                                   |    |    | 1.07 | 2.3  | 2    |      |
|        |      | SLGECCDVEDSTTCFNAK                        |    |    | 0.74 | 5.3  | 2    |      |
|        |      | GQELCADYSENTFTEYKK                        |    |    | 0.96 | 4.1  | 2    |      |
|        |      | THLPEVFLSK                                |    |    | 0.78 | 3.7  | 3    |      |
|        |      | HLSLLTTLNLR                               |    |    | 0.81 | 3.5  | 2    |      |
|        |      | GQELCADYSENTFTEYK                         |    |    | 0.97 | 5.9  | 2    |      |
|        |      | EVVSLTEACCAEGADPDCYDTR                    |    |    | 1.36 | 5.6  | 2    |      |
|        |      | HQPQEFPTYVEPTNDEICEAFRK                   |    |    | 1.13 | 3.7  | 3    |      |
|        |      | KFPSGTFEQVSQLVK                           |    |    | 1.14 | 5.0  | 2    |      |
|        |      | RSDFASNCCSINSPLYCDSEIDAELK                |    |    | 1.08 | 5.6  | 3    |      |
|        |      | HQPQEFPTYVEPTNDEICEAFR                    |    |    | 1.25 | 5.9  | 3    |      |
|        |      | SYLSMVGSCCTSASPTVCFLK+Oxidation(4)        |    |    | 1.15 | 5.0  | 2    |      |
|        |      | FPSGTFEQVSQLVK                            |    |    | 1.51 | 4.8  | 2    |      |
|        |      | SDFASNCCSINSPLYCDSEIDAELK                 |    |    | 1.20 | 5.3  | 3    |      |
|        |      | ELSSFIDKQELCADYSENTFTEYK                  |    |    | 1.68 | 5.5  | 3    |      |
|        |      | SYLSMVGSCCTSASPTVCFLK                     |    |    | 1.24 | 5.8  | 2    |      |
| P02786 | TFR1 | Transferrin receptor protein 1            | 3  | 3  | 10   | 1.38 | 1.49 | 0.81 |
|        |      | LLNENSYVPR                                |    |    | 1.31 | 3.0  | 2    |      |



|        |      |                                              |    |     |      |      |      |      |
|--------|------|----------------------------------------------|----|-----|------|------|------|------|
|        |      | LAVDEEENADNNTK                               |    |     | 2.60 | 3.9  | 2    |      |
|        |      | DSAQNSVIIVDK                                 |    |     | 1.33 | 2.4  | 2    |      |
| P02787 | TRFE | Serotransferrin                              | 48 | 304 | 3086 | 0.89 | 0.05 | 0.00 |
|        |      | HQTVPQNTGGK                                  |    |     | 0.79 | 2.4  | 2    |      |
|        |      | WCALSHHER                                    |    |     | 0.71 | 3.5  | 2    |      |
|        |      | KDSGFQMNQLR+Oxidation(6)                     |    |     | 0.88 | 3.9  | 3    |      |
|        |      | WCAVSEHEATK                                  |    |     | 0.73 | 4.0  | 2    |      |
|        |      | EGTCPEAPTDECKPVK                             |    |     | 0.54 | 3.6  | 2    |      |
|        |      | KPVVEYANCHLAR                                |    |     | 0.99 | 4.1  | 3    |      |
|        |      | DSAHGFLK                                     |    |     | 0.84 | 2.4  | 2    |      |
|        |      | DDTVCLAK                                     |    |     | 0.80 | 2.6  | 2    |      |
|        |      | DSGFQMNQLR+Oxidation(5)                      |    |     | 0.96 | 3.4  | 2    |      |
|        |      | DCHLAQVPSHTVVAR                              |    |     | 0.97 | 4.6  | 2    |      |
|        |      | KDSGFQMNQLR                                  |    |     | 0.75 | 3.8  | 3    |      |
|        |      | SKEFQLFSSPHGK                                |    |     | 1.42 | 4.4  | 3    |      |
|        |      | KPVDEYKDCHLAQVPSHTVVAR                       |    |     | 1.08 | 5.4  | 3    |      |
|        |      | LKCDEWSVNSVGK                                |    |     | 0.90 | 4.5  | 2    |      |
|        |      | HSTIFENLANK                                  |    |     | 0.79 | 4.7  | 2    |      |
|        |      | CDEWSVNSVGK                                  |    |     | 0.83 | 3.7  | 2    |      |
|        |      | IECVSAETTEDCIAK                              |    |     | 0.95 | 5.3  | 2    |      |
|        |      | LCMGSGLNLCPEPNNK+Oxidation(2)                |    |     | 0.94 | 4.7  | 2    |      |
|        |      | YLGEEYVK                                     |    |     | 0.92 | 3.0  | 2    |      |
|        |      | DGAGDVAFVK                                   |    |     | 0.98 | 4.0  | 2    |      |
|        |      | KSASDLTWDNLK                                 |    |     | 1.00 | 3.7  | 2    |      |
|        |      | ASYLDCIR                                     |    |     | 0.89 | 3.0  | 2    |      |
|        |      | KCSTSSLLEACTFR                               |    |     | 1.20 | 4.4  | 2    |      |
|        |      | EFQLFSSPHGK                                  |    |     | 0.87 | 3.7  | 2    |      |
|        |      | DSGFQMNQLR                                   |    |     | 0.77 | 3.7  | 2    |      |
|        |      | SVIPSDGPSVACVK                               |    |     | 0.76 | 3.6  | 2    |      |
|        |      | EGYYGYTGAFR                                  |    |     | 1.02 | 3.4  | 2    |      |
|        |      | SASDLTWDNLK                                  |    |     | 0.90 | 3.8  | 2    |      |
|        |      | LCMGSGLNLCPEPNNK                             |    |     | 0.57 | 5.1  | 2    |      |
|        |      | CSTSSLLEACTFR                                |    |     | 0.94 | 4.9  | 2    |      |
|        |      | MYLGYEYVTAIR+Oxidation(0)                    |    |     | 0.77 | 4.2  | 2    |      |
|        |      | DLLFRDDTVCLAK                                |    |     | 0.60 | 3.5  | 2    |      |
|        |      | TAGWNIPMGLLYNK+Oxidation(7)                  |    |     | 0.91 | 4.5  | 2    |      |
|        |      | IMNGEADAMSLDGGFVYIAGK+Oxidation(8)           |    |     | 0.76 | 4.9  | 2    |      |
|        |      | IMNGEADAMSLDGGFVYIAGK+Oxidation(1)           |    |     | 0.76 | 5.2  | 2    |      |
|        |      | EDPQTFYYAVAVVK                               |    |     | 0.91 | 4.1  | 2    |      |
|        |      | IMNGEADAMSLDGGFVYIAGK                        |    |     | 0.42 | 5.8  | 2    |      |
|        |      | SMGGKEDLIWELLNQAQEHFGK+Oxidation(1)          |    |     | 0.57 | 5.5  | 3    |      |
|        |      | SMGGKEDLIWELLNQAQEHFGK                       |    |     | 0.76 | 6.5  | 3    |      |
|        |      | AIAANEADAVTLDAGLVYDAYLAPNNLKPVVAEFYGSK       |    |     | 0.97 | 6.0  | 3    |      |
|        |      | LCMGSGLNLCPEPNNKEGYGYTGAFR                   |    |     | 1.45 | 3.8  | 3    |      |
|        |      | AVANFFSGSCAPCADGTFPQLCQLCPGCGCSTLNQYFGYSGAFK |    |     | 0.69 | 6.0  | 4    |      |
|        |      | NLNEKDYELLCLDGTR                             |    |     | 0.66 | 4.4  | 2    |      |
|        |      | TAGWNIPMGLLYNK                               |    |     | 0.69 | 4.7  | 2    |      |
|        |      | EDLIWELLNQAQEHFGK                            |    |     | 0.99 | 4.7  | 2    |      |
|        |      | ADRDQYELLCLDNTR                              |    |     | 0.48 | 4.2  | 3    |      |
|        |      | MYLGYEYVTAIR                                 |    |     | 0.97 | 4.3  | 2    |      |

|        |      |                                                 |    |    |      |      |      |      |
|--------|------|-------------------------------------------------|----|----|------|------|------|------|
|        |      | IMNGEADAMSLDGGFVYIAGK+Oxidation(1),Oxidation(8) |    |    | 0.89 | 4.7  | 2    |      |
| P02788 | TRFL | Lactotransferrin                                | 32 | 63 | 234  | 2.82 | 0.39 | 0.99 |
|        |      | SCHLAMAPNHAVVSR                                 |    |    | 1.26 | 4.5  | 2    |      |
|        |      | THYYAVAVVK                                      |    |    | 0.50 | 2.3  | 1    |      |
|        |      | LRPVAAEVYGTERR                                  |    |    | 2.32 | 3.5  | 2    |      |
|        |      | YYGYTGAFR                                       |    |    | 1.11 | 2.5  | 2    |      |
|        |      | SDTSLTWNSVK                                     |    |    | 3.76 | 3.7  | 2    |      |
|        |      | FFSASCVPGADK                                    |    |    | 1.77 | 3.3  | 2    |      |
|        |      | SNLCALCIGDEQGENK                                |    |    | 3.13 | 5.0  | 2    |      |
|        |      | FQLFGSPSGQK                                     |    |    | 3.86 | 2.5  | 2    |      |
|        |      | DVTVLQNTDGNNEAWAK                               |    |    | 4.23 | 5.6  | 2    |      |
|        |      | GEADAMSLDGGYVYTAGK                              |    |    | 1.75 | 5.1  | 2    |      |
|        |      | NLLFNDNTECLAR                                   |    |    | 6.85 | 3.8  | 2    |      |
|        |      | SQQSSDPDPCVDRPVEGYLAVAVVR                       |    |    | 1.58 | 5.0  | 3    |      |
|        |      | YLG PQYVAGITNLK                                 |    |    | 1.54 | 4.2  | 2    |      |
|        |      | DSPIQCIQIAENR                                   |    |    | 1.68 | 4.7  | 3    |      |
|        |      | ADAVTL DGGFIYEAGLAPYK                           |    |    | 1.68 | 5.8  | 2    |      |
|        |      | IDSGLYL GSGYFTAQNLR                             |    |    | 0.55 | 4.9  | 3    |      |
|        |      | SCHLAMAPNHAVVSR+Oxidation(5)                    |    |    | 1.09 | 3.8  | 2    |      |
|        |      | RS D TSLTWNSVK                                  |    |    | 2.26 | 3.5  | 2    |      |
|        |      | DGAGD VAFIR                                     |    |    | 2.38 | 3.1  | 2    |      |
|        |      | KGGSFQLNELQGLK                                  |    |    | 2.16 | 4.2  | 3    |      |
|        |      | GGSFQLNELQGLK                                   |    |    | 1.93 | 3.7  | 2    |      |
|        |      | SVNGKEDAIWNLLR                                  |    |    | 2.08 | 2.5  | 2    |      |
|        |      | EDAIWNLLR                                       |    |    | 1.60 | 2.6  | 2    |      |
|        |      | SVQWCAVSQPEATK                                  |    |    | 1.26 | 4.6  | 2    |      |
|        |      | GEADAMSLDGGYVYTAGK+Oxidation(5)                 |    |    | 0.45 | 4.2  | 2    |      |
|        |      | FDEYFSQSCAPGSDPR                                |    |    | 0.33 | 4.5  | 2    |      |
|        |      | CLAENAGD VAFVK                                  |    |    | 2.05 | 4.3  | 2    |      |
|        |      | VWCAVGEQELR                                     |    |    | 1.84 | 3.4  | 2    |      |
|        |      | CGLVPVLAENYK                                    |    |    | 2.39 | 3.0  | 2    |      |
|        |      | CSTSP LLEACEFLR                                 |    |    | 0.96 | 3.6  | 2    |      |
|        |      | FCLFQSETK                                       |    |    | 0.84 | 2.5  | 2    |      |
|        |      | CAFSSQEPYFSYGAFK                                |    |    | 2.85 | 4.6  | 2    |      |
| P02790 | HEMO | Hemopexin                                       | 21 | 93 | 830  | 0.83 | 0.08 | 0.99 |
|        |      | VDGALCMEK+Oxidation(6)                          |    |    | 0.90 | 2.9  | 2    |      |
|        |      | VDGALCMEK                                       |    |    | 0.77 | 3.0  | 2    |      |
|        |      | VWVYPPEKK                                       |    |    | 0.93 | 2.7  | 2    |      |
|        |      | DYFMPCPGR+Oxidation(3)                          |    |    | 0.82 | 2.6  | 2    |      |
|        |      | GGYTLVSGYPK                                     |    |    | 0.91 | 4.2  | 2    |      |
|        |      | VWVYPPEK                                        |    |    | 0.97 | 2.6  | 2    |      |
|        |      | DYFMPCPGR                                       |    |    | 0.91 | 2.8  | 2    |      |
|        |      | YYCFQGNQFLR                                     |    |    | 1.02 | 3.7  | 2    |      |
|        |      | NFPSPVDAEFR                                     |    |    | 1.00 | 2.6  | 1    |      |
|        |      | SGAQATWTELPWPHEK                                |    |    | 1.01 | 5.1  | 3    |      |
|        |      | GECQAEGV LFFQGDR                                |    |    | 1.26 | 4.6  | 2    |      |
|        |      | CSPHLVLSALTS DNHGATYAFSGTHYWR                   |    |    | 0.92 | 5.4  | 4    |      |
|        |      | RLWWLDLK                                        |    |    | 1.27 | 2.7  | 2    |      |
|        |      | SLGPNSCSANGPGLYLIHGPNLYCYSDVEK                  |    |    | 1.00 | 5.1  | 3    |      |
|        |      | EVGTPHG IILDSVDAAFICPGSSR                       |    |    | 1.06 | 5.8  | 2    |      |

|        |       |                                       |    |    |      |      |      |      |
|--------|-------|---------------------------------------|----|----|------|------|------|------|
|        |       | LLQDEFPGIPSPLDAAVECHR                 |    |    | 1.09 | 5.1  | 2    |      |
|        |       | DGWHSWPIAHQWPQGSAVDAAFSWEK            |    |    | 0.92 | 4.9  | 3    |      |
|        |       | LWWLDLK                               |    |    | 0.89 | 2.5  | 2    |      |
|        |       | LYLVQGTQVYVFLTK                       |    |    | 1.21 | 5.1  | 2    |      |
|        |       | EWFWDLATGTMK                          |    |    | 1.27 | 3.3  | 2    |      |
|        |       | LHIMAGR                               |    |    | 0.07 | 2.0  | 1    |      |
| P02812 | PRB2  | Basic salivary proline_rich protein 2 | 2  | 8  | 14   | 0.00 | 0.00 | 0.63 |
|        |       | SQGPPPPGKPPQGGGSK                     |    |    | 0.01 | 4.1  | 2    |      |
|        |       | SPPGKPPQGGNQPQGGPPPPGKPPQGGNK         |    |    | 0.00 | 5.6  | 4    |      |
| P03952 | KLKB1 | Plasma kallikrein                     | 3  | 4  | 19   | 1.14 | 0.66 | 0.85 |
|        |       | GVNVCQETCTK                           |    |    | 0.89 | 3.3  | 2    |      |
|        |       | IAYGTQGSSGYSLR                        |    |    | 1.39 | 2.4  | 2    |      |
|        |       | LVGITSWGEGCAR                         |    |    | 0.85 | 2.4  | 2    |      |
| P03973 | SLPI  | Antileukoproteinase                   | 4  | 6  | 70   | 1.08 | 1.00 | 1.00 |
|        |       | YKKPECQSDWQCPGK                       |    |    | 0.94 | 5.1  | 3    |      |
|        |       | CLDPVDTNPTR                           |    |    | 1.15 | 3.5  | 2    |      |
|        |       | KPECQSDWQCPGK                         |    |    | 1.32 | 3.6  | 3    |      |
|        |       | KPECQSDWQCPGK                         |    |    | 1.79 | 3.6  | 2    |      |
| P04003 | C4BPA | C4b_binding protein alpha chain       | 5  | 6  | 13   | 1.10 | 0.64 | 0.99 |
|        |       | YTCLPGYVR                             |    |    | 0.81 | 2.8  | 2    |      |
|        |       | FSAICQGDGTWSPR                        |    |    | 0.94 | 3.7  | 2    |      |
|        |       | EDVYVGTVLR                            |    |    | 0.84 | 2.4  | 2    |      |
|        |       | WNPSPPACEPNSCINLPDIPHASWETYPRTK       |    |    | 1.19 | 5.0  | 4    |      |
|        |       | WTPYQGCEALCCPEPK                      |    |    | 1.10 | 3.5  | 2    |      |
| P04004 | VTNC  | Vitronectin                           | 6  | 19 | 101  | 1.39 | 0.19 | 1.00 |
|        |       | GQYCYELDEK                            |    |    | 0.58 | 3.2  | 2    |      |
|        |       | FEDGVLDPDYPR                          |    |    | 1.42 | 4.0  | 2    |      |
|        |       | SIAQYWLGCAPAGHL                       |    |    | 1.10 | 4.4  | 2    |      |
|        |       | DVWGIEGPIDAAFTR                       |    |    | 1.44 | 4.3  | 2    |      |
|        |       | DWHGVPGQVDAAMAGR                      |    |    | 1.06 | 3.1  | 2    |      |
|        |       | CQCDELCSYYQSCCTDYTAECKPVTR            |    |    | 0.78 | 5.0  | 3    |      |
| P04040 | CATA  | Catalase                              | 2  | 2  | 4    | 1.43 | 2.78 | 0.89 |
|        |       | FNTANDDNVTQVR                         |    |    | 1.21 | 3.3  | 2    |      |
|        |       | ADVLTTGAGNPVGDK                       |    |    | 1.51 | 3.1  | 2    |      |
| P04075 | ALDOA | Fructose_bisphosphate aldolase A      | 4  | 6  | 40   | 1.07 | 0.81 | 0.99 |
|        |       | LQSIGTENTEENR                         |    |    | 0.87 | 3.4  | 2    |      |
|        |       | GILAADESTGSIK                         |    |    | 1.49 | 3.9  | 2    |      |
|        |       | GVVPLAGTNGETTTQGLDGLSER               |    |    | 0.99 | 5.1  | 2    |      |
|        |       | RLQSIGTENTEENR                        |    |    | 0.52 | 2.7  | 2    |      |
| P04080 | CYTB  | Cystatin_B                            | 3  | 8  | 27   | 1.33 | 1.26 | 0.28 |
|        |       | VHVGDEDFVHLR                          |    |    | 2.45 | 3.9  | 3    |      |
|        |       | VFQSLPHENKPLTLSNYQTNK                 |    |    | 3.80 | 4.9  | 2    |      |
|        |       | SQVVAGTNYFIK                          |    |    | 1.32 | 3.2  | 2    |      |
| P04083 | ANXA1 | Annexin A1                            | 10 | 23 | 122  | 1.15 | 0.42 | 0.96 |
|        |       | SEIDMNDIK                             |    |    | 1.33 | 2.5  | 2    |      |
|        |       | GDRSEDFGVNEDLADSDAR                   |    |    | 1.25 | 4.3  | 3    |      |
|        |       | SEDFGVNEDLADSDAR                      |    |    | 1.61 | 5.0  | 2    |      |
|        |       | VLDLELK                               |    |    | 1.26 | 2.5  | 2    |      |
|        |       | GGPGSAVSPYPTFNPSSDVAALHK              |    |    | 1.40 | 4.1  | 2    |      |
|        |       | GVDEATIIDLTK                          |    |    | 1.27 | 4.5  | 2    |      |

|        |      |                                                      |    |    |      |      |      |      |
|--------|------|------------------------------------------------------|----|----|------|------|------|------|
|        |      | DITSDTSGDFR                                          |    |    | 1.66 | 3.6  | 2    |      |
|        |      | GTDVNVFNTILTTR                                       |    |    | 0.94 | 4.4  | 2    |      |
|        |      | MYGISLCQAILDETK                                      |    |    | 1.13 | 3.4  | 2    |      |
|        |      | AAYLQETGKPLDETLK                                     |    |    | 1.77 | 3.5  | 2    |      |
| P04114 | APOB | Apolipoprotein B_100                                 | 22 | 28 | 86   | 3.56 | 0.63 | 0.00 |
|        |      | ALVEQGFTVPEIK                                        |    |    | 3.15 | 3.3  | 2    |      |
|        |      | EFQVPTFTIPK                                          |    |    | 3.52 | 2.5  | 2    |      |
|        |      | TSSFALNLPTLPEVK                                      |    |    | 3.56 | 3.2  | 2    |      |
|        |      | LTISEQNIQR                                           |    |    | 1.22 | 2.4  | 2    |      |
|        |      | ILGEELGFASLHDLQLLGK                                  |    |    | 1.55 | 3.8  | 3    |      |
|        |      | GNVATEISTER                                          |    |    | 2.34 | 2.8  | 2    |      |
|        |      | VLVDHFGYTK                                           |    |    | 2.17 | 2.3  | 2    |      |
|        |      | YTYNYEAESSGVPGTADSR                                  |    |    | 0.85 | 5.4  | 2    |      |
|        |      | HINIDQFVR                                            |    |    | 2.35 | 2.8  | 2    |      |
|        |      | TQFNNNEYSQDLDAYNTK                                   |    |    | 8.66 | 5.1  | 2    |      |
|        |      | YGMVAQVTQTLK                                         |    |    | 3.65 | 3.3  | 2    |      |
|        |      | NLQNNAEWVYQGAIR                                      |    |    | 4.36 | 3.6  | 2    |      |
|        |      | ALYWVNGQVPDGVSK                                      |    |    | 3.09 | 2.9  | 2    |      |
|        |      | ITENDIQIALDDAK                                       |    |    | 3.21 | 4.0  | 2    |      |
|        |      | SVSDGIAALDLNAVANK                                    |    |    | 4.28 | 3.4  | 2    |      |
|        |      | IVQILPWEQNEQVK                                       |    |    | 3.35 | 2.4  | 2    |      |
|        |      | VIGNMGQTMEQLTPELK                                    |    |    | 3.00 | 2.4  | 2    |      |
|        |      | AVSMPSFSILGSDVR                                      |    |    | 2.03 | 3.4  | 2    |      |
|        |      | VLLDQLGTTISFER                                       |    |    | 3.47 | 4.0  | 2    |      |
|        |      | VNWEEEEASGLLTSK                                      |    |    | 2.83 | 5.3  | 2    |      |
|        |      | IEGNLIFDPNNYLPK                                      |    |    | 2.38 | 3.5  | 2    |      |
|        |      | ATFQTPDFIVPLTLDR                                     |    |    | 2.35 | 3.7  | 2    |      |
| P04196 | HRG  | Histidine_rich glycoprotein                          | 5  | 12 | 58   | 1.17 | 0.26 | 0.01 |
|        |      | KYWNDCEPPDSR                                         |    |    | 0.87 | 3.0  | 2    |      |
|        |      | YKEENDDFASFR                                         |    |    | 0.73 | 3.8  | 2    |      |
|        |      | HPLKPDNQFPQSVSESCPGK                                 |    |    | 0.75 | 4.1  | 3    |      |
|        |      | KGEVLPLPEANFPSFPLPHHK                                |    |    | 1.17 | 5.6  | 3    |      |
|        |      | DGYLFQLLR                                            |    |    | 0.67 | 2.8  | 2    |      |
| P04217 | A1BG | Alpha_1B_glycoprotein                                | 10 | 24 | 228  | 0.97 | 0.18 | 0.87 |
|        |      | HQFLLTGDTQGR                                         |    |    | 1.02 | 3.7  | 2    |      |
|        |      | CLAPLEGAR                                            |    |    | 0.64 | 2.4  | 2    |      |
|        |      | LLELTGPK                                             |    |    | 0.72 | 2.1  | 1    |      |
|        |      | ATWSGAVLAGR                                          |    |    | 0.99 | 3.8  | 2    |      |
|        |      | SGLSTGWTQLSK                                         |    |    | 0.87 | 4.1  | 2    |      |
|        |      | IFFHLNAVALGDGGHYTCR                                  |    |    | 0.57 | 3.9  | 3    |      |
|        |      | TDGEGALSEPSATVTIEELAAPPPVLMHHGESSQVLHPGNK+Oxidation( |    |    | 0.93 | 4.3  | 4    |      |
|        |      | VTLTCVAPLSGVDFQLR                                    |    |    | 0.92 | 5.9  | 3    |      |
|        |      | SLPAPWLSMAPVSWITPGLK+Oxidation(8)                    |    |    | 0.86 | 4.2  | 2    |      |
|        |      | NGVAQEPVHLDSPAIK                                     |    |    | 0.63 | 3.7  | 2    |      |
| P04220 | MUCB | Ig mu heavy chain disease protein                    | 7  | 30 | 162  | 4.36 | 0.52 | 0.00 |
|        |      | YVTSAPMPEPQAPGR+Oxidation(6)                         |    |    | 5.62 | 3.7  | 2    |      |
|        |      | LICQATGFSPR                                          |    |    | 2.75 | 3.4  | 2    |      |
|        |      | VSVFVPPR                                             |    |    | 2.27 | 3.0  | 2    |      |
|        |      | FTCTVTHDLPSPLK                                       |    |    | 1.84 | 3.8  | 2    |      |
|        |      | GVALHRPDVYLLPPAR                                     |    |    | 2.73 | 4.9  | 3    |      |

|        |       |                                          |    |    |      |      |      |      |
|--------|-------|------------------------------------------|----|----|------|------|------|------|
|        |       | DGFFGNPR                                 |    |    | 4.73 | 2.4  | 2    |      |
|        |       | YVTSAPMPEPQAPGR                          |    |    | 0.73 | 3.7  | 2    |      |
| P04264 | K2C1  | Keratin_type II cytoskeletal 1           | 12 | 18 | 75   | 1.65 | 0.46 | 0.00 |
|        |       | IEISELNR                                 |    |    | 2.50 | 2.5  | 2    |      |
|        |       | FLEQQNQVLQTK                             |    |    | 1.46 | 4.5  | 2    |      |
|        |       | EQIKSLNNQFASFIDK                         |    |    | 0.71 | 1.9  | 1    |      |
|        |       | SLDLDSIIAEVK                             |    |    | 2.53 | 4.5  | 2    |      |
|        |       | SKAEAESLYQSK                             |    |    | 1.44 | 3.5  | 2    |      |
|        |       | WELLQQVDTSTR                             |    |    | 2.17 | 3.8  | 2    |      |
|        |       | QISNLQQSISDAEQR                          |    |    | 3.13 | 4.3  | 2    |      |
|        |       | GSYGGSSYSGGGSSYSGGGGGGGHGSYGGSSSSGGYR    |    |    | 2.08 | 5.7  | 3    |      |
|        |       | LNDLEDALQQAK                             |    |    | 1.74 | 3.5  | 2    |      |
|        |       | GGGGGGYSGGGSSYSGGGSSYSGGGGGGGGR          |    |    | 1.61 | 6.0  | 2    |      |
|        |       | SLNNQFASFIDK                             |    |    | 1.62 | 3.2  | 2    |      |
|        |       | TNAENEFVTIK                              |    |    | 1.53 | 2.6  | 2    |      |
| P04350 | TBB4  | Tubulin beta_4 chain                     | 4  | 7  | 27   | 0.88 | 0.56 | 0.42 |
|        |       | FWEVISDEHGIDPTGTYHGDSLQLER               |    |    | 0.86 | 4.5  | 3    |      |
|        |       | ALTVPELTQQMFDAK                          |    |    | 0.43 | 4.0  | 2    |      |
|        |       | MAATFIGNSTAIQELFK+Oxidation(0)           |    |    | 1.55 | 4.6  | 2    |      |
|        |       | EIVHLQAGQCGNQIGAK                        |    |    | 0.49 | 4.6  | 2    |      |
| P04406 | G3P   | Glyceraldehyde_3_phosphate dehydrogenase | 7  | 13 | 64   | 1.10 | 0.38 | 0.95 |
|        |       | IISNASCTTNCLAPLAK                        |    |    | 1.28 | 3.9  | 2    |      |
|        |       | LISWYDNEFGYSNR                           |    |    | 0.98 | 4.0  | 2    |      |
|        |       | VIHDNFGIVEGLMTTVHAITATQK                 |    |    | 1.04 | 5.0  | 3    |      |
|        |       | GALQNIIPASTGAAK                          |    |    | 1.09 | 3.7  | 2    |      |
|        |       | GILGYTEHQVVSSDFNSDTHSSTFDAGAGIALNDHFVK   |    |    | 1.26 | 5.4  | 4    |      |
|        |       | LIVINGNPITIFQER                          |    |    | 0.70 | 3.3  | 2    |      |
|        |       | VPTANVSVVDLTCR                           |    |    | 2.01 | 2.8  | 2    |      |
| P04632 | CPNS1 | Calpain small subunit 1                  | 4  | 4  | 18   | 0.91 | 0.64 | 0.50 |
|        |       | THYSNIEANESEEEVR                         |    |    | 0.91 | 4.9  | 2    |      |
|        |       | TDGFGIDTCR                               |    |    | 1.25 | 2.5  | 2    |      |
|        |       | SMVAVMDSDTTGK                            |    |    | 0.68 | 2.5  | 2    |      |
|        |       | ILGGVISAISEAAAQYNPEPPPPR                 |    |    | 1.57 | 3.9  | 3    |      |
| P04745 | AMY1  | Alpha_amylase 1                          | 2  | 3  | 4    | 1.76 | 0.05 | 0.35 |
|        |       | YFENGKDVNDWVGPPNDNGVTK                   |    |    | 0.60 | 4.5  | 2    |      |
|        |       | DVNDWVGPPNDNGVTK                         |    |    | 1.77 | 4.1  | 2    |      |
| P04746 | AMYP  | Pancreatic alpha_amylase                 | 11 | 20 | 37   | 1.50 | 0.08 | 0.32 |
|        |       | ALVFVDNHDNQR                             |    |    | 0.21 | 3.1  | 2    |      |
|        |       | TGSGDIENYNDATQVR                         |    |    | 2.05 | 5.1  | 2    |      |
|        |       | AHFSISNSAEDPFIAIHAESKL                   |    |    | 0.33 | 4.8  | 3    |      |
|        |       | IYVDAVINHMCNAVSAGTSSTCGSYFNPGSR          |    |    | 0.18 | 5.5  | 4    |      |
|        |       | HMWPGDIK                                 |    |    | 0.09 | 2.5  | 2    |      |
|        |       | EVTINPDTTCGNDWVCEHR                      |    |    | 0.07 | 3.9  | 2    |      |
|        |       | AHFSISNSAEDPFIAIHAESK                    |    |    | 0.26 | 6.5  | 2    |      |
|        |       | WVDIALECER                               |    |    | 0.06 | 2.7  | 2    |      |
|        |       | TSIVHLFEWR                               |    |    | 0.16 | 2.8  | 2    |      |
|        |       | NVVDGQPFTNWYDNGSNQVAFGR                  |    |    | 0.07 | 5.2  | 2    |      |
|        |       | IAEYMNHLIDIGVAGFR                        |    |    | 0.13 | 4.3  | 2    |      |
| P04792 | HSPB1 | Heat shock protein beta_1                | 4  | 4  | 14   | 1.09 | 0.93 | 0.98 |
|        |       | TKDGVVEITGK                              |    |    | 0.94 | 2.5  | 2    |      |

|        |       |                                          |    |    |        |      |      |      |
|--------|-------|------------------------------------------|----|----|--------|------|------|------|
|        |       | LATQSNEITIPVTFESR                        |    |    | 1.15   | 3.2  | 2    |      |
|        |       | VSLDVNHFAPDELTVK                         |    |    | 0.96   | 3.7  | 2    |      |
|        |       | KYTLPPGVDPTQVSSSLSPGTLTVEAPMPK           |    |    | 1.37   | 4.2  | 3    |      |
| P05091 | ALDH2 | Aldehyde dehydrogenase_mitochondrial     | 12 | 15 | 32     | 2.11 | 1.40 | 0.04 |
|        |       | EEIFGPMQILK+Oxidation(7)                 |    |    | 1.25   | 3.1  | 2    |      |
|        |       | GYFIQPTVFGDVQDGMTIAK                     |    |    | 2.78   | 4.2  | 2    |      |
|        |       | RVTLELGK                                 |    |    | 1.58   | 2.7  | 2    |      |
|        |       | ELGEYGLQAYTEVK                           |    |    | 2.03   | 2.9  | 2    |      |
|        |       | ANNSTYGLAAAVFTK                          |    |    | 2.16   | 4.4  | 2    |      |
|        |       | VIQVAAGSSNLKR                            |    |    | 54.68  | 2.3  | 2    |      |
|        |       | VIQVAAGSSNLK                             |    |    | 116.89 | 4.2  | 2    |      |
|        |       | TEQGPQVDETQFK                            |    |    | 25.34  | 4.3  | 2    |      |
|        |       | KTFPTVNPSTGEVICQVAEGDKEDVDK              |    |    | 3.07   | 5.0  | 3    |      |
|        |       | EEIFGPMQILK                              |    |    | 10.98  | 3.6  | 2    |      |
|        |       | VAFTGSTEIGR                              |    |    | 7.98   | 3.0  | 2    |      |
|        |       | EAGFPPGVNIVPGFGPTAGAAIASHEDVDK           |    |    | 9.49   | 4.0  | 3    |      |
| P05109 | S10A8 | Protein S100_A8                          | 5  | 9  | 33     | 1.06 | 0.24 | 1.00 |
|        |       | GNFHAVYR                                 |    |    | 0.48   | 2.5  | 2    |      |
|        |       | GADVWFK                                  |    |    | 0.79   | 2.5  | 2    |      |
|        |       | LLETECPQYIR                              |    |    | 0.74   | 3.8  | 2    |      |
|        |       | ALNSIIDVYHK                              |    |    | 1.17   | 3.3  | 2    |      |
|        |       | KLLETECPQYIR                             |    |    | 1.17   | 2.4  | 2    |      |
| P05155 | IC1   | Plasma protease C1 inhibitor             | 15 | 49 | 418    | 0.82 | 0.11 | 0.00 |
|        |       | DFTCVHQALK                               |    |    | 0.57   | 3.3  | 2    |      |
|        |       | HRLEDMEQALSPSVFK+Oxidation(5)            |    |    | 0.60   | 4.2  | 3    |      |
|        |       | LLDSLPSDTR                               |    |    | 0.58   | 3.3  | 2    |      |
|        |       | KYPVAHFIDQTLK                            |    |    | 0.83   | 4.1  | 3    |      |
|        |       | HRLEDMEQALSPSVFK                         |    |    | 0.65   | 5.0  | 3    |      |
|        |       | VTTSQDMLSIMEK                            |    |    | 0.62   | 4.1  | 2    |      |
|        |       | LEDMEQALSPSVFK+Oxidation(3)              |    |    | 0.68   | 3.8  | 2    |      |
|        |       | TNLESILSYPK                              |    |    | 0.78   | 4.3  | 2    |      |
|        |       | GVTSVSQIFHSPDLAIR                        |    |    | 0.78   | 4.9  | 2    |      |
|        |       | FQPTLLTLPR                               |    |    | 0.69   | 2.8  | 2    |      |
|        |       | LEDMEQALSPSVFK                           |    |    | 0.68   | 5.0  | 2    |      |
|        |       | VTTSQDMLSIMEK+Oxidation(10)              |    |    | 0.48   | 3.2  | 2    |      |
|        |       | VTTSQDMLSIMEK+Oxidation(6)               |    |    | 0.49   | 2.7  | 2    |      |
|        |       | VTTSQDMLSIMEK+Oxidation(6),Oxidation(10) |    |    | 0.44   | 2.7  | 2    |      |
|        |       | LVLNIAIYLSAK                             |    |    | 0.93   | 4.0  | 2    |      |
| P05156 | CFAI  | Complement factor I                      | 11 | 24 | 135    | 1.15 | 0.21 | 0.03 |
|        |       | HGNTDSEGIVEVK                            |    |    | 0.84   | 4.4  | 2    |      |
|        |       | EMECAGTYDGSIDACK                         |    |    | 0.65   | 4.9  | 2    |      |
|        |       | GLETSLAECTFTK                            |    |    | 0.92   | 4.4  | 2    |      |
|        |       | EANVACLDLGFQQGADTQR                      |    |    | 1.16   | 5.5  | 2    |      |
|        |       | TMGYQDFADVVCYTQK+Oxidation(1)            |    |    | 1.03   | 3.3  | 2    |      |
|        |       | VFSLQWGEVK                               |    |    | 1.16   | 3.9  | 2    |      |
|        |       | TMGYQDFADVVCYTQK                         |    |    | 1.16   | 4.3  | 3    |      |
|        |       | AQLGDLPWQVAIK                            |    |    | 1.25   | 3.8  | 2    |      |
|        |       | YQIWTTVVDWIHPDLK                         |    |    | 0.89   | 4.2  | 3    |      |
|        |       | ACDGINDCGDQSDELCKK                       |    |    | 0.80   | 5.7  | 2    |      |
|        |       | VTYTSQEDLVEK                             |    |    | 1.21   | 3.0  | 2    |      |

|        |       |                                                  |    |    |      |      |      |      |
|--------|-------|--------------------------------------------------|----|----|------|------|------|------|
| P05186 | PPBT  | Alkaline phosphatase_ tissue_nonspecific isozyme | 5  | 7  | 44   | 0.87 | 0.27 | 0.00 |
|        |       | HETHGGEDVAVFSK                                   |    |    | 0.53 | 4.4  | 3    |      |
|        |       | ANEGTVGVSAATER                                   |    |    | 0.49 | 3.3  | 2    |      |
|        |       | TYNTNAQVPDSAGTATAYLCGVK                          |    |    | 0.93 | 4.6  | 2    |      |
|        |       | TDVEYESDEK                                       |    |    | 0.53 | 2.6  | 2    |      |
|        |       | LDGLDLVDTWK                                      |    |    | 1.11 | 3.9  | 2    |      |
| P05362 | ICAM1 | Intercellular adhesion molecule 1                | 12 | 26 | 210  | 0.60 | 0.14 | 0.00 |
|        |       | ASVSVTAEDEGTQR                                   |    |    | 0.67 | 4.4  | 2    |      |
|        |       | KELLPGNNR                                        |    |    | 0.80 | 2.5  | 2    |      |
|        |       | GGSVLVCSTSCDQPK                                  |    |    | 0.60 | 4.7  | 2    |      |
|        |       | DLEGTYLGR                                        |    |    | 0.54 | 2.6  | 2    |      |
|        |       | REPAVGEPAEVTTTVLVR                               |    |    | 0.68 | 4.3  | 3    |      |
|        |       | VTLNGVPAQPLGPR                                   |    |    | 0.69 | 2.8  | 2    |      |
|        |       | EPAVGEPAEVTTTVLVR                                |    |    | 0.87 | 3.0  | 2    |      |
|        |       | LLGIETPLPK                                       |    |    | 0.62 | 3.0  | 2    |      |
|        |       | SFSCSATLEVAGQLIHK                                |    |    | 0.67 | 4.1  | 2    |      |
|        |       | VELAPLPSWQPVGK                                   |    |    | 0.78 | 4.1  | 2    |      |
|        |       | DGTFPLPIGESVTVTR                                 |    |    | 0.77 | 4.1  | 2    |      |
|        |       | VYELSNVQEDSQPMCYSNCPDGQSTAK                      |    |    | 0.54 | 4.3  | 3    |      |
| P05452 | TETN  | Tetranectin                                      | 8  | 8  | 77   | 1.05 | 0.35 | 0.88 |
|        |       | TFHEASEDCISR                                     |    |    | 0.94 | 4.1  | 3    |      |
|        |       | TENCAVLGAANGK                                    |    |    | 0.95 | 4.4  | 2    |      |
|        |       | NWETEITAQPDGGK                                   |    |    | 0.79 | 3.7  | 2    |      |
|        |       | NWETEITAQPDGGKTENCAVLGAANGK                      |    |    | 1.11 | 4.1  | 3    |      |
|        |       | SRLDTLAQEVALLK                                   |    |    | 1.18 | 3.5  | 2    |      |
|        |       | LDTLAQEVALLK                                     |    |    | 1.21 | 4.6  | 2    |      |
|        |       | EQQALQTVCLK                                      |    |    | 0.69 | 2.9  | 2    |      |
|        |       | GGTLGTPQTGSENDALYEYLR                            |    |    | 0.85 | 2.9  | 2    |      |
| P05543 | THBG  | Thyroxine_binding globulin                       | 4  | 5  | 21   | 1.25 | 0.45 | 0.03 |
|        |       | FSISATYDLGATLLK                                  |    |    | 1.19 | 3.8  | 2    |      |
|        |       | GTEAAAVPEVELSDQPENTFLHPHIIQIDR                   |    |    | 1.31 | 3.7  | 3    |      |
|        |       | EGQMESVEAAMSSK                                   |    |    | 1.52 | 3.2  | 2    |      |
|        |       | QEINSHVEMQTK                                     |    |    | 0.48 | 3.3  | 2    |      |
| P05546 | HEP2  | Heparin cofactor 2                               | 3  | 3  | 7    | 0.78 | 0.46 | 0.33 |
|        |       | HQGTITVNEEGTQATTVTTVGFMPPLSTQVR+Oxidation(22)    |    |    | 0.88 | 3.7  | 3    |      |
|        |       | HQGTITVNEEGTQATTVTTVGFMPPLSTQVR                  |    |    | 0.86 | 3.7  | 3    |      |
|        |       | GGETAQSADPQWEQLNNK                               |    |    | 0.54 | 4.9  | 2    |      |
| P05787 | K2C8  | Keratin_type II cytoskeletal 8                   | 3  | 3  | 4    | 0.96 | 0.98 | 0.80 |
|        |       | LEGLTDEINFLR                                     |    |    | 1.18 | 2.5  | 2    |      |
|        |       | TEMENEFVLIK                                      |    |    | 0.61 | 2.0  | 1    |      |
|        |       | SLDMDSIIAEVK                                     |    |    | 0.80 | 2.9  | 2    |      |
| P05997 | CO5A2 | Collagen alpha-2(V) chain                        | 2  | 3  | 6    | 0.80 | 0.62 | 0.23 |
|        |       | TPASLQADKTVR                                     |    |    | 0.80 | 2.1  | 1    |      |
|        |       | IDLDNAGKLVVAK                                    |    |    | 0.46 | 3.1  | 2    |      |
| P06310 | KV206 | Ig kappa chain V_II region RPMI 6410             | 2  | 5  | 63   | 0.89 | 0.48 | 0.69 |
|        |       | FSGSGSGTDFTLK                                    |    |    | 0.90 | 3.7  | 2    |      |
|        |       | FSGSGSGTDFTLKISR                                 |    |    | 0.82 | 3.5  | 2    |      |
| P06314 | KV404 | Ig kappa chain V_IV region B17                   | 2  | 7  | 42   | 0.60 | 0.30 | 0.00 |
|        |       | NYLAWYQQKPGQPPK                                  |    |    | 1.04 | 4.0  | 2    |      |
|        |       | LLIYWASTR                                        |    |    | 0.55 | 3.1  | 2    |      |

|        |       |                                          |    |    |     |      |      |      |
|--------|-------|------------------------------------------|----|----|-----|------|------|------|
| P06331 | HV209 | Ig heavy chain V_II region ARH_77        | 2  | 3  | 27  | 0.64 | 0.39 | 0.00 |
|        |       | VTISLDTSK                                |    |    |     | 0.64 | 2.3  | 2    |
|        |       | LSSVTAADTAVYYCAR                         |    |    |     | 0.66 | 5.0  | 2    |
| P06396 | GELS  | Gelsolin                                 | 14 | 31 | 198 | 0.95 | 0.16 | 0.79 |
|        |       | DSQEEKTEALTSK                            |    |    |     | 1.00 | 5.5  | 3    |
|        |       | HVVPNEVVVQR                              |    |    |     | 1.00 | 3.6  | 3    |
|        |       | TGAQELLR                                 |    |    |     | 0.78 | 2.7  | 2    |
|        |       | VPFDAATLHTSTAMAAQHGMDDDG TGQK            |    |    |     | 0.92 | 4.1  | 3    |
|        |       | AGALNSNDAFVLK                            |    |    |     | 1.00 | 3.8  | 2    |
|        |       | TPSAAYLWVGTGASEAEK                       |    |    |     | 1.10 | 3.7  | 2    |
|        |       | VHVSEEGTEPEAMLQVLGPKPALPAGTEDTAK         |    |    |     | 0.94 | 5.6  | 3    |
|        |       | QTQVSVLPEGGETPLFK                        |    |    |     | 1.44 | 4.3  | 2    |
|        |       | NWRDPDQTDGLGLSYLSSHIANVER                |    |    |     | 1.13 | 5.3  | 3    |
|        |       | VSNGAGTMSVSLVADENPFAQGALK+Oxidation(7)   |    |    |     | 0.90 | 4.7  | 3    |
|        |       | DPDQTDGLGLSYLSSHIANVER                   |    |    |     | 1.02 | 5.4  | 3    |
|        |       | AQPVQVAEGSEPDGFWEALGGK                   |    |    |     | 1.15 | 6.0  | 2    |
|        |       | VSNGAGTMSVSLVADENPFAQGALK                |    |    |     | 0.99 | 5.5  | 3    |
|        |       | YIETDPANR                                |    |    |     | 0.70 | 2.4  | 2    |
| P06576 | ATPB  | ATP synthase subunit beta_ mitochondrial | 4  | 5  | 6   | 3.67 | 1.18 | 0.30 |
|        |       | VALVYQMNEPPGAR                           |    |    |     | 0.49 | 2.3  | 2    |
|        |       | AIAELGIYPAVDPLDSTSR                      |    |    |     | 5.51 | 4.0  | 2    |
|        |       | TIAMDGTEGLVR                             |    |    |     | 4.61 | 2.7  | 2    |
|        |       | FTQAGSEVSALLGR                           |    |    |     | 9.65 | 2.4  | 2    |
| P06681 | CO2   | Complement C2                            | 15 | 27 | 132 | 0.65 | 0.14 | 0.00 |
|        |       | HAFILQDTK                                |    |    |     | 0.59 | 2.6  | 2    |
|        |       | CSSNLVLTGSSER                            |    |    |     | 0.75 | 3.9  | 2    |
|        |       | ECQGNVWVSGTEPICR                         |    |    |     | 0.53 | 3.5  | 2    |
|        |       | VLMSVLNDNSR+Oxidation(2)                 |    |    |     | 1.69 | 2.0  | 1    |
|        |       | VLMSVLNDNSR                              |    |    |     | 1.09 | 3.2  | 2    |
|        |       | ALHQVFEHMLDVSK                           |    |    |     | 0.76 | 3.6  | 3    |
|        |       | MGVEWTSCAEVVSQEK                         |    |    |     | 1.05 | 4.4  | 2    |
|        |       | DFHINLFR                                 |    |    |     | 0.68 | 2.7  | 2    |
|        |       | EVVTDQFLCSGTQEDESPCKGESGGAVFLER          |    |    |     | 0.65 | 6.2  | 3    |
|        |       | AVISPGFDVFAK                             |    |    |     | 0.69 | 2.9  | 2    |
|        |       | LLGMETMAWQEIR                            |    |    |     | 1.26 | 3.3  | 2    |
|        |       | DMTEVISSLENANYK                          |    |    |     | 0.56 | 3.3  | 2    |
|        |       | SSGQWQTPGATR                             |    |    |     | 0.40 | 3.0  | 2    |
|        |       | HAIILLTDGK                               |    |    |     | 0.52 | 3.0  | 2    |
|        |       | GESGGAVFLER                              |    |    |     | 1.29 | 2.7  | 2    |
| P06702 | S10A9 | Protein S100_A9                          | 7  | 16 | 83  | 0.77 | 0.58 | 1.00 |
|        |       | LGHPDTLNQGEFK                            |    |    |     | 0.82 | 3.5  | 3    |
|        |       | VIEHIMEDLDTNADK                          |    |    |     | 0.45 | 5.4  | 2    |
|        |       | NIETIINTFHQYSVK                          |    |    |     | 0.84 | 4.8  | 2    |
|        |       | KDLQNFLK                                 |    |    |     | 1.05 | 2.8  | 2    |
|        |       | MHEGDEGPGHHHKPGLGEGTP+Oxidation(0)       |    |    |     | 0.64 | 3.6  | 2    |
|        |       | MHEGDEGPGHHHKPGLGEGTP                    |    |    |     | 0.31 | 2.7  | 2    |
|        |       | VIEHIMEDLDTNADK+Oxidation(5)             |    |    |     | 0.45 | 4.3  | 2    |
| P06727 | APOA4 | Apolipoprotein A_IV                      | 18 | 30 | 191 | 1.04 | 0.40 | 0.00 |
|        |       | TQVNTQAEQLR                              |    |    |     | 1.02 | 3.2  | 2    |
|        |       | RVEPYGENFNK                              |    |    |     | 1.28 | 3.6  | 3    |



|        |      |                                   |   |    |      |      |       |      |
|--------|------|-----------------------------------|---|----|------|------|-------|------|
|        |      | ISASAEELR                         |   |    | 1.20 | 3.3  | 2     |      |
|        |      | SLAPYAQDTQEK                      |   |    | 0.95 | 3.1  | 2     |      |
|        |      | KLVPFATELHER                      |   |    | 0.54 | 4.4  | 3     |      |
|        |      | LGEVNTYAGDLQK                     |   |    | 0.63 | 4.0  | 2     |      |
|        |      | LKEEIGKELEELR                     |   |    | 2.17 | 4.3  | 3     |      |
|        |      | DKVNSFFSTFK                       |   |    | 1.30 | 3.0  | 2     |      |
|        |      | SLAELGGHLDQQVEEFR                 |   |    | 1.29 | 5.1  | 3     |      |
|        |      | SELTQQLNALFQDK                    |   |    | 1.33 | 5.1  | 2     |      |
|        |      | IDQNVEELK                         |   |    | 1.36 | 2.9  | 2     |      |
|        |      | LGPAGDVEGHLSFLEK                  |   |    | 2.24 | 4.7  | 2     |      |
|        |      | LNHQLEGLTFQMK                     |   |    | 1.31 | 3.8  | 2     |      |
|        |      | SLAELGGHLDQQVEEFR                 |   |    | 1.63 | 4.0  | 3     |      |
|        |      | LVPFATELHER                       |   |    | 1.09 | 2.7  | 2     |      |
|        |      | ALVQQMEQLR                        |   |    | 0.90 | 2.7  | 2     |      |
|        |      | AKIDQNVEELK                       |   |    | 1.57 | 2.8  | 2     |      |
|        |      | ENADSLQASLRPHADELK                |   |    | 1.01 | 3.6  | 2     |      |
| P06733 | ENOA | Alpha_enolase                     | 9 | 16 | 81   | 1.61 | 0.50  | 0.00 |
|        |      | KLNVTEQEK                         |   |    | 1.20 | 2.4  | 2     |      |
|        |      | IGAEVYHNLK                        |   |    | 1.62 | 3.1  | 2     |      |
|        |      | VNQIGSVTESLQACK                   |   |    | 1.51 | 4.9  | 2     |      |
|        |      | DATNVGDEGGFAPNILENK               |   |    | 2.07 | 5.2  | 2     |      |
|        |      | FTASAGIQVVGDDLTVTNPK              |   |    | 1.68 | 5.2  | 2     |      |
|        |      | HIADLAGNSEVILPVPAFNVIINGGSHAGNK   |   |    | 2.25 | 6.2  | 3     |      |
|        |      | SCNCLLLK                          |   |    | 1.10 | 2.5  | 2     |      |
|        |      | LMIEMDGTENK                       |   |    | 1.13 | 2.6  | 2     |      |
|        |      | YISPDQLADLYK                      |   |    | 1.61 | 3.5  | 2     |      |
| P06737 | PYGL | Glycogen phosphorylase_liver form | 2 | 3  | 4    | 1.12 | 0.92  | 0.83 |
|        |      | DFNVGDYIQAFLDR                    |   |    | 1.25 | 2.5  | 1     |      |
|        |      | LVIDQIDNGFFSPK                    |   |    | 0.84 | 2.5  | 2     |      |
| P06744 | G6PI | Glucose_6_phosphate isomerase     | 3 | 4  | 32   | 0.99 | 0.58  | 0.88 |
|        |      | HFVALSTNTTK                       |   |    | 1.16 | 3.1  | 2     |      |
|        |      | TFTTQETITNAETAK                   |   |    | 0.97 | 4.8  | 2     |      |
|        |      | VWYVSNIDGTHIAK                    |   |    | 0.32 | 3.3  | 2     |      |
| P06753 | TPM3 | Tropomyosin alpha_3 chain         | 4 | 4  | 8    | 2.83 | 3.17  | 0.15 |
|        |      | YSQKEDKYEEEIK                     |   |    | 2.24 | 4.0  | 2     |      |
|        |      | AADAEAEVASLNR                     |   |    | 3.80 | 2.6  | 2     |      |
|        |      | MELQEIQLK                         |   |    | 2.72 | 3.0  | 2     |      |
|        |      | KLVIIEGDLER                       |   |    | 2.89 | 2.4  | 2     |      |
| P06865 | HEXA | Beta_hexosaminidase subunit alpha | 2 | 2  | 2    | 6.20 | 15.12 | 0.35 |
|        |      | GSYNPVTHIYTAQDVK                  |   |    | 6.20 | 2.9  | 2     |      |
|        |      | IQPDTIIQVWR                       |   |    | 6.13 | 2.6  | 2     |      |
| P07108 | ACBP | Acyl_CoA_binding protein          | 3 | 3  | 7    | 1.75 | 1.92  | 0.00 |
|        |      | WDAWNEK                           |   |    | 1.65 | 2.5  | 2     |      |
|        |      | AKWDAWNEK                         |   |    | 2.99 | 2.4  | 2     |      |
|        |      | QATVGDINTERPGMLDFTGK              |   |    | 1.85 | 2.7  | 2     |      |
| P07195 | LDHB | L_lactate dehydrogenase B chain   | 5 | 6  | 43   | 0.62 | 0.58  | 0.65 |
|        |      | IVADKDYSVTANSK                    |   |    | 0.62 | 4.1  | 2     |      |
|        |      | SADTLWDIQK                        |   |    | 0.75 | 2.7  | 2     |      |
|        |      | MVESAYEVIK                        |   |    | 1.10 | 4.3  | 2     |      |
|        |      | LIAPVAEEEEATVPNNK                 |   |    | 0.47 | 3.1  | 2     |      |

|        |       |                                      |    |    |       |      |      |      |
|--------|-------|--------------------------------------|----|----|-------|------|------|------|
|        |       | LKDDEVAQLK                           |    |    | 0.53  | 2.7  | 2    |      |
| P07205 | PGK2  | Phosphoglycerate kinase 2            | 2  | 3  | 24    | 1.41 | 0.91 | 0.17 |
|        |       | VSHVSTGGGASLELLEGGK                  |    |    | 0.95  | 5.4  | 2    |      |
|        |       | LGDVYVNDAFGTAHR                      |    |    | 1.46  | 4.0  | 2    |      |
| P07237 | PDIA1 | Protein disulfide_isomerase          | 3  | 3  | 3     | 0.92 | 1.23 | 0.43 |
|        |       | EADDIVNWLK                           |    |    | 2.56  | 2.4  | 2    |      |
|        |       | QFLQAAEAIDDIPFGITSNSDVFSK            |    |    | 0.79  | 3.7  | 3    |      |
|        |       | VDATEESDLAQQYGVR                     |    |    | 3.31  | 3.9  | 2    |      |
| P07339 | CATD  | Cathepsin D                          | 10 | 32 | 53    | 2.57 | 0.85 | 0.05 |
|        |       | FDGILGMAYPR+Oxidation(6)             |    |    | 1.61  | 2.7  | 2    |      |
|        |       | FDGILGMAYPR                          |    |    | 4.64  | 3.8  | 2    |      |
|        |       | AIGAVPLIQGEYMIPCEK+Oxidation(12)     |    |    | 1.44  | 3.9  | 2    |      |
|        |       | DPDAQPGGELMLGGTDSK                   |    |    | 10.16 | 4.9  | 2    |      |
|        |       | VGFAEAAR                             |    |    | 49.95 | 2.5  | 2    |      |
|        |       | AYWQVHLDQVEVASGLTLCK                 |    |    | 3.65  | 4.6  | 2    |      |
|        |       | EGCEAIVDTGTSLMVGPDVEVR               |    |    | 3.58  | 4.2  | 2    |      |
|        |       | AIGAVPLIQGEYMIPCEK                   |    |    | 4.85  | 3.9  | 2    |      |
|        |       | DPDAQPGGELMLGGTDSK+Oxidation(10)     |    |    | 8.91  | 5.0  | 2    |      |
|        |       | EGCEAIVDTGTSLMVGPDVEVR+Oxidation(13) |    |    | 4.52  | 5.1  | 2    |      |
| P07355 | ANXA2 | Annexin A2                           | 2  | 5  | 30    | 1.33 | 0.75 | 1.00 |
|        |       | QDIAFAYQR                            |    |    | 1.26  | 3.0  | 2    |      |
|        |       | GVDEVTIVNILTNR                       |    |    | 1.34  | 4.6  | 2    |      |
| P07357 | CO8A  | Complement component C8 alpha chain  | 6  | 10 | 51    | 0.77 | 0.29 | 0.00 |
|        |       | INVGGGLSGDHCK                        |    |    | 0.85  | 3.0  | 2    |      |
|        |       | LGSLGAACEQTQTEGAK                    |    |    | 0.64  | 3.9  | 2    |      |
|        |       | AIDEDCSQYEPIPGSQK                    |    |    | 0.63  | 4.0  | 2    |      |
|        |       | FGGTICSGDIWDQASCSSSTTCVR             |    |    | 0.77  | 4.5  | 2    |      |
|        |       | HLVCNGDQDCLDGSDEDDCEDVR              |    |    | 0.45  | 6.7  | 3    |      |
|        |       | CGPCFNNGVPILEGTSCR                   |    |    | 0.88  | 3.5  | 2    |      |
| P07358 | CO8B  | Complement component C8 beta chain   | 3  | 3  | 13    | 0.68 | 0.50 | 0.00 |
|        |       | CEGFVCAQTGR                          |    |    | 0.68  | 3.3  | 2    |      |
|        |       | RLLCNGDNDCGDQSDEANCR                 |    |    | 0.45  | 4.2  | 3    |      |
|        |       | CDCICPVGSQGLACEVSYR                  |    |    | 0.73  | 4.4  | 2    |      |
| P07360 | CO8G  | Complement component C8 gamma chain  | 3  | 7  | 37    | 1.07 | 0.31 | 0.95 |
|        |       | QLYGDTGVLGR                          |    |    | 0.83  | 2.8  | 2    |      |
|        |       | VQEAHLTEDQIFYFPK                     |    |    | 1.07  | 4.2  | 2    |      |
|        |       | SLPVSDSVLSGFQR                       |    |    | 1.06  | 4.5  | 2    |      |
| P07437 | TBB5  | Tubulin beta chain                   | 9  | 11 | 36    | 1.24 | 0.46 | 0.14 |
|        |       | ISVYYNEATGGK                         |    |    | 1.21  | 2.6  | 2    |      |
|        |       | ISEQFTAMFR                           |    |    | 0.65  | 3.4  | 2    |      |
|        |       | YLTVAAVFR                            |    |    | 0.81  | 2.5  | 2    |      |
|        |       | AILVDLEPGTMDSVR                      |    |    | 1.46  | 3.9  | 2    |      |
|        |       | ALTVPELTQQVFDK                       |    |    | 1.58  | 2.9  | 2    |      |
|        |       | EIVHIQAGQCGNQIGAK                    |    |    | 0.49  | 4.6  | 2    |      |
|        |       | EVDEQMLNVQNK                         |    |    | 0.34  | 3.8  | 2    |      |
|        |       | IMNTFSVVPSPK                         |    |    | 0.64  | 3.6  | 2    |      |
|        |       | SGPFGQIFRPDNFVFGQSGAGNNWAK           |    |    | 0.53  | 6.7  | 3    |      |
| P07602 | SAP   | Proactivator polypeptide             | 2  | 2  | 2     | 1.04 | 1.05 | 0.62 |
|        |       | LVGYLDR                              |    |    | 4.76  | 2.3  | 2    |      |
|        |       | GCSFLDPYQK                           |    |    | 1.03  | 2.3  | 2    |      |

|        |       |                                             |   |    |     |       |       |      |
|--------|-------|---------------------------------------------|---|----|-----|-------|-------|------|
| P07686 | HEXB  | Beta_hexosaminidase subunit beta            | 2 | 2  | 2   | 1.56  | 1.66  | 0.27 |
|        |       | GSIVWQEVFDDK                                |   |    |     | 1.56  | 3.4   | 2    |
|        |       | GIAAQPLYAGYCNHENM                           |   |    |     | 1.52  | 2.4   | 2    |
| P07737 | PROF1 | Profilin_1                                  | 6 | 13 | 109 | 1.32  | 0.50  | 0.00 |
|        |       | STGGAPTFNVTGTK                              |   |    |     | 1.80  | 3.6   | 2    |
|        |       | DSPSVWAAVPGK                                |   |    |     | 1.83  | 2.7   | 2    |
|        |       | DSLLQDGEFSMDLR+Oxidation(10)                |   |    |     | 1.39  | 3.3   | 2    |
|        |       | DSLLQDGEFSMDLR                              |   |    |     | 1.30  | 4.8   | 2    |
|        |       | TFVNITPAEVLVVGK                             |   |    |     | 1.71  | 4.7   | 2    |
|        |       | SSFYVNGLTLGGQK                              |   |    |     | 1.43  | 4.3   | 2    |
| P07858 | CATB  | Cathepsin B                                 | 4 | 5  | 16  | 6.86  | 12.65 | 0.22 |
|        |       | HYGYSYSVSNSEK                               |   |    |     | 16.23 | 4.7   | 2    |
|        |       | SGVYQHVTGEMMGGHAIR                          |   |    |     | 10.43 | 4.4   | 3    |
|        |       | GQDHCGIESEVVAGIPR                           |   |    |     | 17.08 | 5.1   | 2    |
|        |       | ICEPGYSPTYK                                 |   |    |     | 5.59  | 3.2   | 2    |
| P07900 | HS90A | Heat shock protein HSP 90_alpha             | 9 | 16 | 49  | 1.24  | 0.48  | 1.00 |
|        |       | HIYYITGETK                                  |   |    |     | 1.27  | 3.4   | 2    |
|        |       | DQVANSAFVER                                 |   |    |     | 1.25  | 2.9   | 2    |
|        |       | YYTSASGDEMVLK                               |   |    |     | 1.19  | 3.2   | 2    |
|        |       | NPDDITNEEYGEFYK                             |   |    |     | 0.96  | 4.5   | 2    |
|        |       | TLTIVDTGIGMTK                               |   |    |     | 1.31  | 3.8   | 2    |
|        |       | HLEINPDHSIIETLR                             |   |    |     | 1.17  | 3.8   | 2    |
|        |       | YYTSASGDEMVLK+Oxidation(9)                  |   |    |     | 0.98  | 3.3   | 2    |
|        |       | ELHINLIPNKQDR                               |   |    |     | 0.89  | 2.9   | 2    |
|        |       | RAPFDLFENR                                  |   |    |     | 0.61  | 2.6   | 2    |
| P07988 | PSPB  | Pulmonary surfactant_associated protein B   | 8 | 14 | 60  | 0.89  | 0.27  | 0.00 |
|        |       | GALAVAVAQVCR                                |   |    |     | 0.63  | 3.6   | 2    |
|        |       | VVPLVAGGICQCLAER                            |   |    |     | 0.55  | 4.7   | 2    |
|        |       | QFVEQHTPQLLTLVPR                            |   |    |     | 0.70  | 3.9   | 3    |
|        |       | GWDAHTTCQALGVCMTMSSPLQCIHSPDL+Oxidation(16) |   |    |     | 1.00  | 5.7   | 3    |
|        |       | GWDAHTTCQALGVCMTMSSPLQCIHSPDL               |   |    |     | 0.83  | 5.9   | 3    |
|        |       | FLEQECNVLPLK                                |   |    |     | 0.96  | 3.9   | 2    |
|        |       | YSVILLDTLLGR                                |   |    |     | 0.25  | 3.1   | 2    |
|        |       | KFLEQECNVLPLK                               |   |    |     | 1.09  | 3.1   | 2    |
| P07998 | RNAS1 | Ribonuclease pancreatic                     | 5 | 11 | 27  | 0.63  | 0.19  | 0.00 |
|        |       | HIIVACEGSPYVPVHFDASVEDST                    |   |    |     | 0.68  | 3.9   | 3    |
|        |       | QHMDSDSSPSSSSTYCNQMMR+Oxidation(19)         |   |    |     | 0.23  | 4.3   | 3    |
|        |       | QHMDSDSSPSSSSTYCNQMMR+Oxidation(18)         |   |    |     | 0.23  | 4.2   | 3    |
|        |       | QHMDSDSSPSSSSTYCNQMMR                       |   |    |     | 0.19  | 4.6   | 3    |
|        |       | CKPVNTFVHEPLVDVQNVCFQEK                     |   |    |     | 0.54  | 4.4   | 4    |
| P08107 | HSP71 | Heat shock 70 kDa protein 1A/1B             | 7 | 11 | 43  | 1.13  | 0.44  | 0.67 |
|        |       | YKAEDVQR                                    |   |    |     | 1.24  | 3.7   | 3    |
|        |       | LVNHFVEEFK                                  |   |    |     | 1.03  | 2.5   | 2    |
|        |       | AQIHDLVLVGGSTR                              |   |    |     | 1.16  | 3.7   | 2    |
|        |       | LLQDFFNQR                                   |   |    |     | 1.13  | 2.6   | 2    |
|        |       | ELEQVCNPIISGLYQGAGGPGGGFGAQGPK              |   |    |     | 1.76  | 5.0   | 3    |
|        |       | NQVALNPQNTVFDAK                             |   |    |     | 1.10  | 4.5   | 2    |
|        |       | DAGVIAGLNVLR                                |   |    |     | 1.17  | 3.6   | 2    |
| P08185 | CBG   | Corticosteroid_binding globulin             | 6 | 9  | 38  | 0.81  | 0.37  | 1.00 |
|        |       | HLVALSPK                                    |   |    |     | 1.01  | 2.3   | 2    |

|        |       |                                                            |    |    |       |      |      |      |
|--------|-------|------------------------------------------------------------|----|----|-------|------|------|------|
|        |       | SETEIHQGFQHLHQLFAK                                         |    |    | 1.05  | 4.0  | 3    |      |
|        |       | EENFYVDETTVVK                                              |    |    | 0.80  | 3.1  | 2    |      |
|        |       | GTWTQPFDLASTR                                              |    |    | 0.98  | 3.0  | 2    |      |
|        |       | WSAGLTSSQVDLYIPK                                           |    |    | 0.70  | 3.3  | 2    |      |
|        |       | MNTVIAALSR                                                 |    |    | 1.24  | 2.5  | 2    |      |
| P08238 | HS90B | Heat shock protein HSP 90_beta                             | 11 | 20 | 68    | 1.31 | 0.35 | 0.98 |
|        |       | EDQTEYLEER                                                 |    |    | 0.77  | 3.0  | 2    |      |
|        |       | EQVANSAFVER                                                |    |    | 1.29  | 2.7  | 2    |      |
|        |       | HFSVEGQLEFR                                                |    |    | 1.44  | 2.8  | 2    |      |
|        |       | ADLINNLGTIAK                                               |    |    | 1.39  | 3.6  | 2    |      |
|        |       | TLTLVDTGIGMTK                                              |    |    | 1.31  | 3.8  | 2    |      |
|        |       | GVVDSIDLPLNISR                                             |    |    | 1.09  | 4.1  | 2    |      |
|        |       | YIDQEELNK                                                  |    |    | 0.72  | 2.6  | 1    |      |
|        |       | HLEINPDHPIVETLR                                            |    |    | 1.68  | 3.9  | 3    |      |
|        |       | SLTNDWEDHLAVK                                              |    |    | 1.23  | 3.3  | 2    |      |
|        |       | HNDDEQYAWESSAGGSFTVR                                       |    |    | 0.73  | 5.7  | 2    |      |
|        |       | NPDDITQEEYGEFYK                                            |    |    | 0.70  | 4.2  | 2    |      |
| P08571 | CD14  | Monocyte differentiation antigen CD14                      | 3  | 4  | 18    | 0.97 | 0.55 | 0.98 |
|        |       | LTVGAAQVPAQLLVGALR                                         |    |    | 0.92  | 4.4  | 2    |      |
|        |       | ITGTMPPLEATGLALSSLR+Oxidation(4)                           |    |    | 1.23  | 2.5  | 2    |      |
|        |       | ITGTMPPLEATGLALSSLR                                        |    |    | 1.03  | 2.6  | 2    |      |
| P08603 | CFAH  | Complement factor H                                        | 15 | 26 | 129   | 0.97 | 0.23 | 0.99 |
|        |       | TGESVEFVCK                                                 |    |    | 0.96  | 2.8  | 2    |      |
|        |       | LSYTCEGGFR                                                 |    |    | 1.04  | 2.6  | 2    |      |
|        |       | AGEQVITYTCATYYK                                            |    |    | 0.99  | 4.8  | 2    |      |
|        |       | IVSSAMEPDREYHFGQAVR                                        |    |    | 0.71  | 3.7  | 3    |      |
|        |       | LGYVTADGETSGSITCGK                                         |    |    | 1.13  | 4.6  | 2    |      |
|        |       | SPPEISHGVVAHMSDSYQYGEEVYK                                  |    |    | 1.26  | 5.0  | 3    |      |
|        |       | SSNLIILEEHLK                                               |    |    | 1.12  | 3.5  | 2    |      |
|        |       | NTEILTGSWSDQTYPEGTQAIYK                                    |    |    | 1.04  | 4.6  | 2    |      |
|        |       | TDCLSLPSFENAIPMGEK                                         |    |    | 1.10  | 3.2  | 2    |      |
|        |       | SITCIHGVTQLPQCVAIDK                                        |    |    | 1.29  | 4.1  | 3    |      |
|        |       | WSSPPQCEGLPCK                                              |    |    | 0.88  | 2.8  | 2    |      |
|        |       | KGEWVALNPLR                                                |    |    | 0.96  | 3.2  | 2    |      |
|        |       | AVYTCNEGYQLLGEINYR                                         |    |    | 1.99  | 2.6  | 2    |      |
|        |       | SSIDIENGFISESQYTYALK                                       |    |    | 1.24  | 4.1  | 2    |      |
|        |       | SPDVINGSPISQK                                              |    |    | 1.12  | 3.2  | 2    |      |
| P08637 | FCG3A | Low affinity immunoglobulin gamma Fc region receptor III_A | 2  | 2  | 19    | 0.77 | 0.42 | 0.11 |
|        |       | YFHHNSDFYIPK                                               |    |    | 0.71  | 3.7  | 3    |      |
|        |       | AVVFLEPQWYR                                                |    |    | 0.86  | 3.3  | 2    |      |
| P08670 | VIME  | Vimentin                                                   | 26 | 40 | 123   | 3.12 | 0.55 | 0.03 |
|        |       | DGQVINETSQHDDLE                                            |    |    | 2.10  | 3.4  | 2    |      |
|        |       | FADLSEAANR                                                 |    |    | 12.98 | 3.1  | 2    |      |
|        |       | VELQELNDR                                                  |    |    | 3.13  | 2.9  | 2    |      |
|        |       | SLYASSPGGVYATR                                             |    |    | 3.69  | 4.3  | 2    |      |
|        |       | QVQSLTCEVDALK                                              |    |    | 11.87 | 4.1  | 2    |      |
|        |       | LHEEEIQELQAQIQEQHVQIDVDVSKPDLTAALR                         |    |    | 4.96  | 5.8  | 4    |      |
|        |       | ISLPLPNFSSLNLR                                             |    |    | 0.41  | 2.5  | 2    |      |
|        |       | EEAENTLQSFR                                                |    |    | 8.91  | 3.1  | 2    |      |
|        |       | LGDLYEEEMR                                                 |    |    | 7.75  | 3.6  | 2    |      |

|        |       |                                     |   |    |       |      |      |      |
|--------|-------|-------------------------------------|---|----|-------|------|------|------|
|        |       | NLQEAEWYK                           |   |    | 25.68 | 3.2  | 2    |      |
|        |       | DNLAEDIMR                           |   |    | 12.82 | 2.9  | 2    |      |
|        |       | KVESLQEEIAFLK                       |   |    | 2.43  | 3.9  | 2    |      |
|        |       | EKLQEEMLQR                          |   |    | 21.06 | 2.7  | 2    |      |
|        |       | TNEKVELQELNDR                       |   |    | 6.37  | 3.0  | 2    |      |
|        |       | LQDEIQNMKEEMAR                      |   |    | 13.26 | 3.3  | 2    |      |
|        |       | EYQDLLNVK                           |   |    | 15.95 | 2.3  | 1    |      |
|        |       | KVESLQEEIAFLKK                      |   |    | 5.53  | 3.7  | 3    |      |
|        |       | ETNLDSLPLVDTHSK                     |   |    | 10.24 | 3.9  | 2    |      |
|        |       | MALDIEIATYR                         |   |    | 2.08  | 3.8  | 2    |      |
|        |       | LLQDSVDFSLADAINTEFK                 |   |    | 1.37  | 2.6  | 2    |      |
|        |       | KLLEGEESR                           |   |    | 11.57 | 2.5  | 2    |      |
|        |       | LQEEMLQR+Oxidation(4)               |   |    | 18.73 | 2.6  | 2    |      |
|        |       | LQEEMLQR                            |   |    | 14.59 | 2.5  | 2    |      |
|        |       | DNLAEDIMR+Oxidation(7)              |   |    | 10.64 | 2.4  | 2    |      |
|        |       | KLHEEEIQELQAQIQEQHVQIDVDVSKPDLTAALR |   |    | 4.94  | 4.6  | 4    |      |
| P08697 | A2AP  | Alpha_2_antiplasmin                 | 2 | 2  | 4     | 0.81 | 0.71 | 0.49 |
|        |       | LGNQEPGGQTALK                       |   |    | 0.58  | 2.4  | 2    |      |
|        |       | LCQDLGPGAFR                         |   |    | 0.81  | 2.3  | 2    |      |
| P08727 | K1C19 | Keratin_type I cytoskeletal 19      | 2 | 2  | 2     | 1.15 | 2.85 | 0.99 |
|        |       | IVLQIDNAR                           |   |    | 1.02  | 2.5  | 2    |      |
|        |       | TKFETEQLR                           |   |    | 1.15  | 2.5  | 2    |      |
| P08758 | ANXA5 | Annexin A5                          | 7 | 12 | 56    | 2.10 | 0.63 | 0.00 |
|        |       | LYDAYELK                            |   |    | 1.35  | 2.4  | 2    |      |
|        |       | VLTEIIASR                           |   |    | 2.27  | 2.6  | 2    |      |
|        |       | GTVTDFPGFDER                        |   |    | 2.01  | 3.3  | 2    |      |
|        |       | FITIFGTR                            |   |    | 1.68  | 2.4  | 2    |      |
|        |       | SEIDLFNIR                           |   |    | 2.92  | 2.4  | 2    |      |
|        |       | DLLDDLKSELTGK                       |   |    | 2.10  | 4.0  | 2    |      |
|        |       | YMTISGFQIEETIDR                     |   |    | 1.43  | 3.5  | 2    |      |
| P09104 | ENOG  | Gamma_enolase                       | 2 | 3  | 17    | 1.70 | 1.36 | 0.00 |
|        |       | IEEELGDEAR                          |   |    | 1.64  | 2.6  | 2    |      |
|        |       | FGANAILGVSLAVCK                     |   |    | 2.15  | 4.2  | 2    |      |
| P09210 | GSTA2 | Glutathione S_transferase A2        | 5 | 6  | 32    | 0.87 | 0.57 | 0.90 |
|        |       | SHGQDYLVGNK                         |   |    | 0.47  | 3.6  | 2    |      |
|        |       | SAEDLDKLR                           |   |    | 0.38  | 2.7  | 2    |      |
|        |       | NDGYLMFQQVPMVEIDGMK+Oxidation(17)   |   |    | 0.89  | 3.6  | 2    |      |
|        |       | NDGYLMFQQVPMVEIDGMK+Oxidation(11)   |   |    | 0.92  | 3.4  | 2    |      |
|        |       | NDGYLMFQQVPMVEIDGMK                 |   |    | 1.83  | 4.4  | 2    |      |
| P09211 | GSTP1 | Glutathione S_transferase P         | 9 | 19 | 113   | 1.32 | 0.45 | 0.00 |
|        |       | ASCLYGQLPK                          |   |    | 1.18  | 3.1  | 2    |      |
|        |       | ALPGQLKPFETLLSQNQGGK                |   |    | 1.28  | 4.3  | 3    |      |
|        |       | AFLASPEYVNLPIGNGK                   |   |    | 1.20  | 5.1  | 2    |      |
|        |       | DQQEAALVDMVNDGVEDLR                 |   |    | 1.73  | 6.4  | 2    |      |
|        |       | MLLADQGQSWK+Oxidation(0)            |   |    | 1.37  | 2.9  | 2    |      |
|        |       | MLLADQGQSWK                         |   |    | 1.38  | 3.5  | 2    |      |
|        |       | EEVTVETWQEGSLK                      |   |    | 1.24  | 4.5  | 2    |      |
|        |       | YISLIYTNYEAGKDDYVK                  |   |    | 0.73  | 4.9  | 2    |      |
|        |       | FQDGDLTLYQSNTILR                    |   |    | 2.84  | 4.7  | 2    |      |
| P09228 | CYTT  | Cystatin_SA                         | 3 | 3  | 4     | 0.07 | 0.12 | 0.39 |

|        |       |                                  |    |     |      |      |      |      |
|--------|-------|----------------------------------|----|-----|------|------|------|------|
|        |       | ATEDEYYR                         |    |     | 0.06 | 2.6  | 2    |      |
|        |       | SQPNLDTCAFHEQPELQK               |    |     | 0.03 | 4.8  | 2    |      |
|        |       | IIEGGIYDADLNDER                  |    |     | 0.19 | 4.7  | 2    |      |
| P09382 | LEG1  | Galectin_1                       | 2  | 3   | 23   | 1.97 | 2.04 | 0.46 |
|        |       | FNAHGDANTIVCNSK                  |    |     | 2.57 | 4.3  | 2    |      |
|        |       | DSNNLCLHFNPR                     |    |     | 1.46 | 3.2  | 2    |      |
| P09467 | F16P1 | Fructose_1_6_bisphosphatase 1    | 8  | 14  | 58   | 1.60 | 0.99 | 0.02 |
|        |       | AGIAHLYGIAGSTNVTGDQVK            |    |     | 1.47 | 5.4  | 2    |      |
|        |       | DFDPAVTEYIQR                     |    |     | 2.20 | 3.1  | 2    |      |
|        |       | LLYECNPMAYVMEK                   |    |     | 2.35 | 3.6  | 2    |      |
|        |       | GTGELTQLLNSLCTAVK                |    |     | 2.23 | 4.4  | 2    |      |
|        |       | KAGIAHLYGIAGSTNVTGDQVK           |    |     | 1.87 | 4.8  | 2    |      |
|        |       | EAVLDVIPTDIHQR                   |    |     | 3.29 | 4.4  | 2    |      |
|        |       | STDEPSEKDALQPGR                  |    |     | 2.68 | 2.7  | 2    |      |
|        |       | TLVYGGIFLYPANKK                  |    |     | 2.56 | 2.5  | 2    |      |
| P09525 | ANXA4 | Annexin A4                       | 4  | 5   | 8    | 1.36 | 0.91 | 0.81 |
|        |       | VLVSL SAGGRDEGNYLDDALVR          |    |     | 1.62 | 3.9  | 3    |      |
|        |       | VLVSL SAGGR                      |    |     | 1.19 | 2.6  | 2    |      |
|        |       | AASGFNAMEDAQTLR                  |    |     | 1.32 | 3.7  | 2    |      |
|        |       | DEGNYLDDALVR                     |    |     | 1.04 | 3.0  | 2    |      |
| P09668 | CATH  | Pro_cathepsin H                  | 6  | 13  | 47   | 1.17 | 0.59 | 1.00 |
|        |       | VNHAVLAVGYGEK                    |    |     | 1.28 | 3.8  | 3    |      |
|        |       | TPDKVNHAVLAVGYGEK                |    |     | 1.28 | 3.8  | 3    |      |
|        |       | GIMGEDTYPYQGK                    |    |     | 1.13 | 3.7  | 2    |      |
|        |       | GIMGEDTYPYQGK+Oxidation(2)       |    |     | 0.94 | 3.1  | 2    |      |
|        |       | NMCGLAACASYPIPLV+Oxidation(1)    |    |     | 1.25 | 2.3  | 2    |      |
|        |       | NMCGLAACASYPIPLV                 |    |     | 1.09 | 2.7  | 2    |      |
| P09960 | LKHA4 | Leukotriene A_4 hydrolase        | 14 | 30  | 125  | 1.02 | 0.20 | 0.16 |
|        |       | DGETPDPEDPSR                     |    |     | 1.09 | 2.5  | 2    |      |
|        |       | LTYTAEVSVPK                      |    |     | 1.57 | 3.1  | 2    |      |
|        |       | EDDLNSFNATDLK                    |    |     | 1.37 | 4.1  | 2    |      |
|        |       | TLTGTAALTVQSQEDNLR               |    |     | 0.90 | 5.6  | 2    |      |
|        |       | SAYEFSETESMLK                    |    |     | 1.09 | 3.3  | 2    |      |
|        |       | HFNALGGWGELQNSVK                 |    |     | 0.97 | 4.0  | 2    |      |
|        |       | SSALQWLTPEQTSGK                  |    |     | 1.76 | 4.6  | 2    |      |
|        |       | SLSNVIAHEISHSWTGNLVTNK           |    |     | 1.25 | 4.1  | 3    |      |
|        |       | WEDAIPLALK                       |    |     | 1.31 | 2.8  | 2    |      |
|        |       | GSPMEISLPIALSK                   |    |     | 1.90 | 3.8  | 2    |      |
|        |       | LVVDLTDIDPDVAYSSVPYEK            |    |     | 1.13 | 4.3  | 2    |      |
|        |       | DLSSHQLNEFLAQTQR                 |    |     | 0.94 | 3.6  | 3    |      |
|        |       | EHPYLFSQCQAIHCR                  |    |     | 2.20 | 3.5  | 2    |      |
|        |       | GSPMEISLPIALSK+Oxidation(3)      |    |     | 2.42 | 3.3  | 2    |      |
| P09972 | ALDOC | Fructose_bisphosphate aldolase C | 3  | 4   | 8    | 1.91 | 1.31 | 0.05 |
|        |       | GVVPLAGTDGETTTQGLDGLSER          |    |     | 2.06 | 5.3  | 2    |      |
|        |       | YASICQQNGIVPIVEPEILPDGDHDLKR     |    |     | 1.85 | 4.5  | 3    |      |
|        |       | YASICQQNGIVPIVEPEILPDGDHDLK      |    |     | 1.61 | 4.4  | 3    |      |
| P0C0L5 | CO4B  | Complement C4_B                  | 47 | 112 | 708  | 0.65 | 0.08 | 0.00 |
|        |       | SHALQLNNR                        |    |     | 0.61 | 3.0  | 2    |      |
|        |       | VDVQAGACEGK                      |    |     | 0.62 | 3.8  | 2    |      |
|        |       | LGQYASPTAK                       |    |     | 0.46 | 2.5  | 2    |      |

|        |       |                                      |   |    |      |      |      |      |
|--------|-------|--------------------------------------|---|----|------|------|------|------|
|        |       | LVNGQSHISLSK                         |   |    | 0.47 | 3.7  | 2    |      |
|        |       | SCGLHQLLR                            |   |    | 0.70 | 3.5  | 2    |      |
|        |       | CSVFYGAPSK                           |   |    | 0.69 | 3.0  | 2    |      |
|        |       | ITQVLHFTK                            |   |    | 0.68 | 2.9  | 2    |      |
|        |       | AEFQDALEK                            |   |    | 0.53 | 3.0  | 2    |      |
|        |       | EMSGSPASGIPVK                        |   |    | 1.43 | 2.6  | 2    |      |
|        |       | LELSVDGAK                            |   |    | 0.61 | 2.0  | 1    |      |
|        |       | VEYGFQVK                             |   |    | 0.72 | 3.0  | 2    |      |
|        |       | VLSLAQEQVGG SPEK                     |   |    | 0.53 | 5.3  | 2    |      |
|        |       | TEQWSTLPPETK                         |   |    | 0.47 | 3.7  | 2    |      |
|        |       | VDFTLSSER                            |   |    | 0.70 | 3.2  | 2    |      |
|        |       | MRPSTDTITVMVENSHGLR+Oxidation(0)     |   |    | 0.70 | 5.0  | 3    |      |
|        |       | MRPSTDTITVMVENSHGLR+Oxidation(10)    |   |    | 0.70 | 3.6  | 3    |      |
|        |       | KYVLPNFEVK                           |   |    | 0.59 | 3.9  | 3    |      |
|        |       | VGDTLNLNLR                           |   |    | 0.30 | 3.2  | 2    |      |
|        |       | MRPSTDTITVMVENSHGLR                  |   |    | 0.73 | 5.9  | 3    |      |
|        |       | LLATLCSAEVCQCAEGK                    |   |    | 0.68 | 5.2  | 3    |      |
|        |       | GHLFLQTDQPIYNPGQR                    |   |    | 0.49 | 5.6  | 2    |      |
|        |       | ADGSYAAWLSR                          |   |    | 0.73 | 3.6  | 2    |      |
|        |       | GLCVATPVQLR                          |   |    | 0.74 | 2.6  | 2    |      |
|        |       | EGAIHREELVYELNPLDHR                  |   |    | 0.64 | 5.4  | 3    |      |
|        |       | AEMADQASAWLTR                        |   |    | 1.51 | 2.8  | 2    |      |
|        |       | GSFEFPVGDVAVSK                       |   |    | 0.58 | 3.6  | 2    |      |
|        |       | EELVYELNPLDHR                        |   |    | 0.76 | 3.4  | 2    |      |
|        |       | LNMGITDLQGLR                         |   |    | 0.57 | 3.9  | 2    |      |
|        |       | GLEEELQFSLGSK                        |   |    | 0.80 | 4.7  | 2    |      |
|        |       | LQETSNWLLSQQQADGSFQDLSPVIHR          |   |    | 0.85 | 6.4  | 3    |      |
|        |       | TLEIPGNSDPNMIPDGFNSYVR               |   |    | 0.85 | 3.8  | 2    |      |
|        |       | DFALLSLQVPLKDAK                      |   |    | 0.98 | 3.6  | 2    |      |
|        |       | DFALLSLQVPLK                         |   |    | 0.51 | 4.4  | 2    |      |
|        |       | VTASDPLDTLGSEGALSPGGVASLLR           |   |    | 0.83 | 6.7  | 3    |      |
|        |       | GLQDEDGYR                            |   |    | 0.37 | 3.0  | 2    |      |
|        |       | DHAVDLIQK                            |   |    | 0.44 | 2.8  | 2    |      |
|        |       | LLLSPSVVHLGVPLSVGVQLQDVPR            |   |    | 0.32 | 6.0  | 3    |      |
|        |       | TYNVLDMK                             |   |    | 0.42 | 3.3  | 2    |      |
|        |       | YVLPNFEVK                            |   |    | 0.72 | 2.1  | 1    |      |
|        |       | YIYGKPVQGVAYVR                       |   |    | 0.84 | 4.0  | 2    |      |
|        |       | VGLSGMAIADVTLISGFHALR                |   |    | 0.48 | 4.4  | 3    |      |
|        |       | YLDKTEQWSTLPPETK                     |   |    | 0.41 | 3.8  | 2    |      |
|        |       | LNMGITDLQGLR+Oxidation(2)            |   |    | 1.47 | 2.8  | 2    |      |
|        |       | TLEIPGNSDPNMIPDGFNSYVR+Oxidation(11) |   |    | 0.61 | 3.4  | 2    |      |
|        |       | ITPGKPYILTVPGHLEMLDIQAR              |   |    | 0.54 | 4.1  | 3    |      |
|        |       | RCSVFYGAPSK                          |   |    | 1.21 | 2.6  | 2    |      |
|        |       | TTNIQGINLLFSSR                       |   |    | 0.30 | 2.6  | 2    |      |
| POC0S5 | H2AZ  | Histone H2A.Z                        | 2 | 2  | 3    | 2.91 | 6.53 | 0.42 |
|        |       | AGLQFPVGR                            |   |    | 3.22 | 2.6  | 2    |      |
|        |       | HLQLAIR                              |   |    | 2.51 | 2.4  | 2    |      |
| POCG39 | POTEJ | POTE ankyrin domain family member J  | 6 | 11 | 56   | 1.10 | 0.40 | 0.30 |
|        |       | RGILTLK                              |   |    | 1.90 | 2.4  | 2    |      |
|        |       | QEYDESGPSIVHR                        |   |    | 1.76 | 3.7  | 3    |      |

|        |       |                                         |    |    |       |      |       |      |
|--------|-------|-----------------------------------------|----|----|-------|------|-------|------|
|        |       | IWHHTFYNELR                             |    |    | 1.03  | 3.7  | 3     |      |
|        |       | KDLIVMLRDTDVVK                          |    |    | 1.42  | 2.4  | 2     |      |
|        |       | QMLKISSENSNPEQDLK                       |    |    | 2.16  | 2.7  | 2     |      |
|        |       | AGFAGDDAPR                              |    |    | 1.18  | 3.2  | 2     |      |
| P10253 | LYAG  | Lysosomal alpha_glucosidase             | 3  | 3  | 3     | 1.39 | 2.58  | 0.54 |
|        |       | VTSEGAGLQLQK                            |    |    | 14.40 | 3.6  | 2     |      |
|        |       | AGYIIPLQGPGLTTTESR                      |    |    | 11.40 | 4.4  | 2     |      |
|        |       | NHNSLLSLPQEPYSFSEPAQQAMR                |    |    | 1.28  | 5.4  | 3     |      |
| P10599 | THIO  | Thioredoxin                             | 2  | 3  | 31    | 1.49 | 1.05  | 0.17 |
|        |       | EKLEATINELV                             |    |    | 1.50  | 3.4  | 2     |      |
|        |       | TAFQEALDAAGDK                           |    |    | 1.19  | 3.9  | 2     |      |
| P10643 | CO7   | Complement component C7                 | 9  | 10 | 39    | 0.86 | 0.44  | 0.97 |
|        |       | EQTMSECEAGALR                           |    |    | 0.63  | 3.5  | 2     |      |
|        |       | SSGWHFVVK                               |    |    | 0.87  | 2.5  | 2     |      |
|        |       | SCVGETTESTQCEDEELEHLR                   |    |    | 0.79  | 4.1  | 3     |      |
|        |       | NVVYTCNEGYSLIGNPVAR                     |    |    | 1.11  | 4.8  | 2     |      |
|        |       | LSGNVLSYTFQVK                           |    |    | 0.85  | 3.1  | 2     |      |
|        |       | LIDQYGTHYLQSGSLGGEYR                    |    |    | 1.17  | 5.0  | 2     |      |
|        |       | YSAWAESVTNLPQVIK                        |    |    | 1.19  | 3.2  | 2     |      |
|        |       | SLVCNGSDCDEDESADEDRCEDSER               |    |    | 0.37  | 4.1  | 3     |      |
|        |       | DGFVQDEGTMFPVVK                         |    |    | 0.66  | 2.8  | 2     |      |
| P10809 | CH60  | 60 kDa heat shock protein_mitochondrial | 2  | 2  | 3     | 9.56 | 19.56 | 0.30 |
|        |       | VGGTSDVEVNEK                            |    |    | 11.70 | 2.5  | 2     |      |
|        |       | TVIIQSWGSPK                             |    |    | 7.46  | 2.8  | 2     |      |
| P10909 | CLUS  | Clusterin                               | 6  | 15 | 105   | 0.92 | 0.35  | 0.93 |
|        |       | KYNELLK                                 |    |    | 0.74  | 2.5  | 2     |      |
|        |       | KTLLSNLEEAKK                            |    |    | 1.63  | 4.8  | 3     |      |
|        |       | EILSVCSTNNPSQAK                         |    |    | 0.98  | 4.0  | 2     |      |
|        |       | ELDESLQVAER                             |    |    | 0.84  | 3.4  | 2     |      |
|        |       | VTTVASHTSDSDVPSGVTEVVVK                 |    |    | 0.74  | 6.1  | 2     |      |
|        |       | LFSDPITVTPVEVSR                         |    |    | 1.04  | 5.3  | 2     |      |
| P11021 | GRP78 | 78 kDa glucose_regulated protein        | 6  | 6  | 8     | 2.65 | 2.46  | 0.49 |
|        |       | TWNDPSVQQDIK                            |    |    | 2.05  | 3.2  | 2     |      |
|        |       | TKPYIQVDIGGGQTK                         |    |    | 1.35  | 4.1  | 2     |      |
|        |       | NQLTSNPENTVFDK                          |    |    | 1.92  | 2.9  | 2     |      |
|        |       | SQIFSTASDNQPTVTIK                       |    |    | 3.64  | 3.9  | 2     |      |
|        |       | DAGTIAGLNVMR                            |    |    | 2.63  | 3.6  | 2     |      |
|        |       | ELEEIVQPIISK                            |    |    | 4.94  | 2.8  | 2     |      |
| P11142 | HSP7C | Heat shock cognate 71 kDa protein       | 13 | 22 | 144   | 1.37 | 0.33  | 0.97 |
|        |       | VEIANDQGMR                              |    |    | 1.40  | 3.4  | 2     |      |
|        |       | SQIHDIPLVGGSTR                          |    |    | 1.06  | 4.1  | 2     |      |
|        |       | TTPSYVAFTDTER                           |    |    | 1.54  | 3.4  | 2     |      |
|        |       | TVTNAVVTVPAYFNDSQR                      |    |    | 1.43  | 2.6  | 2     |      |
|        |       | DAGTIAGLNVMR                            |    |    | 1.73  | 3.7  | 2     |      |
|        |       | IINEPTAAAIAYGLDK                        |    |    | 1.41  | 4.4  | 2     |      |
|        |       | FEELNADLFR                              |    |    | 1.29  | 3.1  | 2     |      |
|        |       | SFYPEEVSSMVLTK                          |    |    | 1.05  | 2.7  | 2     |      |
|        |       | SINPDEAVAYGAAVQAAILSGDK                 |    |    | 1.08  | 6.1  | 2     |      |
|        |       | STAGDTHLGGEDFDNR                        |    |    | 1.38  | 3.5  | 2     |      |
|        |       | NQVAMNPTNTVFDK+Oxidation(4)             |    |    | 1.40  | 3.3  | 2     |      |



|        |       |                                                                                                           |   |    |      |      |      |      |
|--------|-------|-----------------------------------------------------------------------------------------------------------|---|----|------|------|------|------|
|        |       | NQVAMNPTNTVFDAK                                                                                           |   |    | 0.99 | 3.8  | 2    |      |
|        |       | QTQTFTTYSNQPGLIQQVYEGER                                                                                   |   |    | 1.17 | 4.1  | 3    |      |
| P11182 | ODB2  | Lipoamide acyltransferase component of branched_chain alpha_keto acid dehydrogenase complex_mitochondrial | 2 | 2  | 4    | 1.78 | 1.21 | 0.37 |
|        |       | SYLENPAFMLLDLK+Oxidation(8)                                                                               |   |    | 0.31 | 2.2  | 1    |      |
|        |       | DMTVPILVSKPPVFTGK+Oxidation(1)                                                                            |   |    | 1.88 | 2.4  | 2    |      |
| P11684 | UTER  | Utteroglobin                                                                                              | 3 | 9  | 133  | 1.25 | 0.91 | 0.99 |
|        |       | KLVDTLTPQKPR                                                                                              |   |    | 1.25 | 4.0  | 3    |      |
|        |       | LVDTLTPQKPR                                                                                               |   |    | 1.00 | 3.2  | 2    |      |
|        |       | IAQSSLCN                                                                                                  |   |    | 0.65 | 1.9  | 1    |      |
| P11686 | PSPC  | Pulmonary surfactant_associated protein C                                                                 | 3 | 3  | 4    | 0.83 | 0.36 | 0.37 |
|        |       | EVLMEPPDYSAAPR+Oxidation(3)                                                                               |   |    | 1.06 | 2.6  | 2    |      |
|        |       | EVLMEPPDYSAAPR                                                                                            |   |    | 0.86 | 2.6  | 2    |      |
|        |       | IAPESIPSLEALNR                                                                                            |   |    | 0.12 | 2.5  | 2    |      |
| P12273 | PIP   | Prolactin_inducible protein                                                                               | 2 | 3  | 17   | 1.12 | 2.44 | 1.00 |
|        |       | TVQIAAVVDVIR                                                                                              |   |    | 1.15 | 4.2  | 2    |      |
|        |       | ELGICPDAAVPIK                                                                                             |   |    | 0.98 | 3.3  | 2    |      |
| P12277 | KCRB  | Creatine kinase B_type                                                                                    | 4 | 5  | 16   | 0.97 | 0.49 | 0.93 |
|        |       | LAVEALSSLDGDLAGR                                                                                          |   |    | 1.07 | 4.3  | 2    |      |
|        |       | FCTGLTQIETLFK                                                                                             |   |    | 0.56 | 2.5  | 2    |      |
|        |       | GTGGVDTAAVGGVFDVSNADR                                                                                     |   |    | 0.79 | 4.4  | 2    |      |
|        |       | DLFDPIIEDR                                                                                                |   |    | 0.12 | 2.5  | 2    |      |
| P12429 | ANXA3 | Annexin A3                                                                                                | 7 | 12 | 36   | 3.34 | 0.46 | 0.00 |
|        |       | GIGTDEFTLNR                                                                                               |   |    | 3.51 | 2.9  | 2    |      |
|        |       | SEIDLLDIR                                                                                                 |   |    | 4.15 | 2.6  | 2    |      |
|        |       | SLGDDISSETSGDFRK                                                                                          |   |    | 3.79 | 2.4  | 2    |      |
|        |       | ALLTLADGR                                                                                                 |   |    | 3.20 | 2.4  | 2    |      |
|        |       | DYPDFSPSVDAEAIQK                                                                                          |   |    | 2.13 | 3.8  | 2    |      |
|        |       | SLGDDISSETSGDFR                                                                                           |   |    | 0.76 | 3.5  | 2    |      |
|        |       | MLISILTER                                                                                                 |   |    | 5.42 | 2.5  | 2    |      |
| P12814 | ACTN1 | Alpha_actinin_1                                                                                           | 2 | 2  | 2    | 2.30 | 1.54 | 0.29 |
|        |       | ETADTDTADQVMASFK                                                                                          |   |    | 1.22 | 3.2  | 2    |      |
|        |       | ICDQWDNLGALTQK                                                                                            |   |    | 3.98 | 3.8  | 2    |      |
| P12830 | CADH1 | Cadherin_1                                                                                                | 2 | 4  | 5    | 0.81 | 0.48 | 0.31 |
|        |       | DTANWLEINPDTGAISTR                                                                                        |   |    | 0.81 | 3.6  | 2    |      |
|        |       | NTGVISVTTGLDR                                                                                             |   |    | 0.65 | 2.4  | 2    |      |
| P13489 | RINI  | Ribonuclease inhibitor                                                                                    | 7 | 8  | 28   | 0.77 | 0.68 | 0.96 |
|        |       | ELTVSNNDINEAGVR                                                                                           |   |    | 1.75 | 3.2  | 2    |      |
|        |       | ELSLAGNELGDEGAR                                                                                           |   |    | 1.37 | 4.1  | 2    |      |
|        |       | VNPALAEINLR                                                                                               |   |    | 0.76 | 3.3  | 2    |      |
|        |       | ELCQGLGQPGSVLR                                                                                            |   |    | 1.53 | 3.3  | 2    |      |
|        |       | LESCGVTSNCR                                                                                               |   |    | 0.92 | 2.9  | 2    |      |
|        |       | LDDCGLTEAR                                                                                                |   |    | 1.40 | 2.4  | 2    |      |
|        |       | SCSFTAACCSHFSSVLAQNR                                                                                      |   |    | 1.31 | 3.7  | 3    |      |
| P13639 | EF2   | Elongation factor 2                                                                                       | 6 | 7  | 8    | 0.93 | 0.43 | 0.07 |
|        |       | IKPVLMNKMMDR+Oxidation(9)                                                                                 |   |    | 0.33 | 1.9  | 1    |      |
|        |       | ETVSEESNVLCLSK                                                                                            |   |    | 1.08 | 3.4  | 2    |      |
|        |       | AYLPVNESFGFTADLR                                                                                          |   |    | 1.24 | 2.8  | 2    |      |
|        |       | TFCQLIDPIFK                                                                                               |   |    | 0.77 | 2.8  | 2    |      |
|        |       | IWCFGPDGTGPNILTDITK                                                                                       |   |    | 1.23 | 4.2  | 2    |      |

|        |       |                                      |    |    |      |      |      |      |
|--------|-------|--------------------------------------|----|----|------|------|------|------|
|        |       | DSVVAGFQWATK                         |    |    | 4.22 | 3.4  | 2    |      |
| P13645 | K1C10 | Keratin_type I cytoskeletal 10       | 12 | 19 | 47   | 2.47 | 0.46 | 0.00 |
|        |       | LENEIQTYR                            |    |    | 1.66 | 2.4  | 2    |      |
|        |       | LKYENEVALR                           |    |    | 3.14 | 3.1  | 2    |      |
|        |       | ELTTEIDNNIEQISSYK                    |    |    | 1.84 | 4.7  | 2    |      |
|        |       | ALEESNYELEGK                         |    |    | 2.93 | 3.5  | 2    |      |
|        |       | VLDELTLTK                            |    |    | 2.83 | 2.3  | 2    |      |
|        |       | GSLGGGFSSGGFSGGSFSR                  |    |    | 0.46 | 4.1  | 2    |      |
|        |       | QSLEASLAETEGR                        |    |    | 3.30 | 2.8  | 2    |      |
|        |       | SLLEGECSGGGGR                        |    |    | 4.85 | 2.8  | 2    |      |
|        |       | SQYEQLAEQNR                          |    |    | 2.13 | 3.5  | 2    |      |
|        |       | NQILNLTDTNANILLQIDNAR                |    |    | 1.65 | 5.8  | 3    |      |
|        |       | IRLENEIQTYR                          |    |    | 2.98 | 3.0  | 2    |      |
|        |       | SQYEQLAEQNRK                         |    |    | 1.87 | 2.9  | 2    |      |
| P13667 | PDIA4 | Protein disulfide_isomerase A4       | 2  | 2  | 2    | 2.55 | 3.58 | 0.37 |
|        |       | IDATSASVLASR                         |    |    | 5.10 | 3.8  | 2    |      |
|        |       | VEGFPTIYFAPSGDK                      |    |    | 1.93 | 4.0  | 2    |      |
| P13671 | CO6   | Complement component C6              | 5  | 7  | 10   | 1.05 | 0.56 | 0.96 |
|        |       | VPANLENVGFVQTAEDDLKTDYK              |    |    | 1.05 | 3.7  | 3    |      |
|        |       | TLNICEVGTIR                          |    |    | 0.98 | 2.6  | 2    |      |
|        |       | IGESIELTCPK                          |    |    | 1.06 | 2.4  | 2    |      |
|        |       | SVLRPSQFGGQPCTAPLVAFQPCIPSK          |    |    | 1.78 | 4.1  | 3    |      |
|        |       | GEVLDSFTGGICK                        |    |    | 1.07 | 2.9  | 2    |      |
| P13796 | PLSL  | Plastin_2                            | 17 | 26 | 116  | 1.23 | 0.34 | 0.48 |
|        |       | EGICAIGGTSEQSSVGTQHSYSEEEK           |    |    | 2.06 | 4.6  | 3    |      |
|        |       | IGNFSTDIK                            |    |    | 1.62 | 2.7  | 2    |      |
|        |       | QFVTATDVVR                           |    |    | 1.93 | 2.7  | 2    |      |
|        |       | AYYHLLQVAPK                          |    |    | 1.60 | 4.2  | 3    |      |
|        |       | YPALHKPENQDIDWGALEGETR               |    |    | 1.70 | 4.6  | 3    |      |
|        |       | NWMNSLGVNPR                          |    |    | 1.37 | 2.6  | 2    |      |
|        |       | FSLVGIGGQDLNEGMR                     |    |    | 1.46 | 4.6  | 2    |      |
|        |       | HVIPMNPNTNDFNAVGDGIVLCK+Oxidation(4) |    |    | 1.03 | 4.2  | 3    |      |
|        |       | GDEEGVPAVVIDMSGRL                    |    |    | 1.54 | 4.5  | 2    |      |
|        |       | VNDDIIVNWVNETLR                      |    |    | 1.25 | 4.8  | 2    |      |
|        |       | VYALPEDLVEVNPV                       |    |    | 1.45 | 3.2  | 2    |      |
|        |       | AECMLQAER                            |    |    | 0.86 | 2.9  | 2    |      |
|        |       | HVIPMNPNTNDFNAVGDGIVLCK              |    |    | 1.31 | 3.5  | 3    |      |
|        |       | YTLNILEEIGGGQK                       |    |    | 1.51 | 3.6  | 2    |      |
|        |       | TENLNDDKLNNAK                        |    |    | 0.77 | 4.0  | 2    |      |
|        |       | WANYHLENAGCNK                        |    |    | 3.32 | 3.9  | 2    |      |
|        |       | GDEEGVPAVVIDMSGRL+Oxidation(12)      |    |    | 0.94 | 3.2  | 2    |      |
| P13797 | PLST  | Plastin_3                            | 6  | 9  | 40   | 1.03 | 0.41 | 0.70 |
|        |       | KLENCNYAVELGK                        |    |    | 1.82 | 3.9  | 2    |      |
|        |       | YAFVNWINK                            |    |    | 1.70 | 2.7  | 2    |      |
|        |       | MINLSVPDTIDER                        |    |    | 1.03 | 3.0  | 2    |      |
|        |       | ANDDIIVNWVNR                         |    |    | 0.77 | 3.2  | 2    |      |
|        |       | MINLSVPDTIDER+Oxidation(0)           |    |    | 1.05 | 3.3  | 2    |      |
|        |       | LENCNYAVELGK                         |    |    | 1.22 | 2.9  | 2    |      |
| P13987 | CD59  | CD59 glycoprotein                    | 2  | 4  | 27   | 0.68 | 0.53 | 0.07 |
|        |       | FEHCNFNDVTTR                         |    |    | 0.87 | 4.0  | 2    |      |

|        |       |                                       |    |    |      |      |      |      |
|--------|-------|---------------------------------------|----|----|------|------|------|------|
|        |       | LRENELTYCCK                           |    |    | 0.51 | 4.0  | 2    |      |
| P14550 | AK1A1 | Alcohol dehydrogenase [NADP_]         | 4  | 7  | 11   | 1.29 | 0.45 | 0.79 |
|        |       | GLEVTAYSPLGSSDR                       |    |    | 1.26 | 4.1  | 2    |      |
|        |       | VFDFTFSPEEMK                          |    |    | 1.31 | 3.3  | 2    |      |
|        |       | GLVQALGLSNFNSR                        |    |    | 1.59 | 3.6  | 2    |      |
|        |       | NADGTICYDSTHYK                        |    |    | 0.89 | 3.5  | 2    |      |
| P14618 | KPYM  | Pyruvate kinase isozymes M1/M2        | 15 | 23 | 100  | 0.97 | 0.35 | 1.00 |
|        |       | GSGTAEVELKK                           |    |    | 1.36 | 2.7  | 2    |      |
|        |       | GSGTAEVELK                            |    |    | 1.60 | 3.2  | 2    |      |
|        |       | LNFSHGTHEYHAETIK                      |    |    | 0.93 | 4.0  | 2    |      |
|        |       | CCSGAIVLTK                            |    |    | 1.16 | 2.5  | 2    |      |
|        |       | LDIDSPITAR                            |    |    | 0.94 | 3.2  | 2    |      |
|        |       | KGVNLPGAAVDLPAVSEK                    |    |    | 1.27 | 3.8  | 2    |      |
|        |       | GVNLPGAAVDLPAVSEK                     |    |    | 1.87 | 4.5  | 2    |      |
|        |       | GADFLVTEVENGGSLGSK                    |    |    | 1.53 | 4.9  | 2    |      |
|        |       | RFDEILEASDGIMVAR                      |    |    | 1.10 | 3.5  | 3    |      |
|        |       | TATESFASDPILYRPVAVALDTK               |    |    | 1.05 | 3.5  | 3    |      |
|        |       | LAPITSDPTEATAVGAVEASFK                |    |    | 1.07 | 3.9  | 2    |      |
|        |       | AEGSDVANAVLDGADCIMLSGETAK             |    |    | 1.21 | 5.4  | 2    |      |
|        |       | FDEILEASDGIMVAR                       |    |    | 1.38 | 3.7  | 2    |      |
|        |       | VNFAMNVGK                             |    |    | 0.83 | 2.5  | 2    |      |
|        |       | NTGIICTIGPASR                         |    |    | 1.37 | 3.8  | 2    |      |
| P15090 | FABP4 | Fatty acid_binding protein_ adipocyte | 3  | 7  | 28   | 1.61 | 1.14 | 0.21 |
|        |       | EVGVGFATR                             |    |    | 1.75 | 2.8  | 2    |      |
|        |       | STITLDGGVLVHVQK                       |    |    | 1.35 | 4.0  | 2    |      |
|        |       | EDDKLVVECVMK                          |    |    | 2.15 | 2.5  | 2    |      |
| P15311 | EZRI  | Ezrin                                 | 5  | 7  | 47   | 0.98 | 0.54 | 1.00 |
|        |       | RKEDEVEEWQHR                          |    |    | 1.16 | 4.6  | 3    |      |
|        |       | ALQLEEER                              |    |    | 0.68 | 2.4  | 2    |      |
|        |       | QLLTLSELSQAR                          |    |    | 0.97 | 4.0  | 2    |      |
|        |       | SQEQLAAELAEYTAK                       |    |    | 0.91 | 4.8  | 2    |      |
|        |       | THNDIIHNENMR+Oxidation(10)            |    |    | 0.75 | 3.4  | 2    |      |
| P15559 | NQO1  | NAD(P)H dehydrogenase [quinone] 1     | 3  | 4  | 7    | 0.84 | 1.61 | 0.98 |
|        |       | IQILEGWK                              |    |    | 1.43 | 2.6  | 2    |      |
|        |       | EGHLSPDIVAEQK                         |    |    | 0.77 | 3.2  | 2    |      |
|        |       | LKDPANFQYPAESVLAYK                    |    |    | 0.83 | 4.0  | 3    |      |
| P15941 | MUC1  | Mucin_1                               | 3  | 4  | 17   | 0.64 | 0.44 | 0.00 |
|        |       | NYGQLDIFPAR                           |    |    | 0.70 | 3.1  | 2    |      |
|        |       | EGTINVHDVETQFNQYK                     |    |    | 0.93 | 3.6  | 2    |      |
|        |       | VSAGNGGSSLSYTNPAVAATSANL              |    |    | 0.47 | 4.1  | 2    |      |
| P16070 | CD44  | CD44 antigen                          | 5  | 10 | 38   | 0.56 | 0.22 | 0.00 |
|        |       | TEAADLCK                              |    |    | 0.56 | 2.3  | 2    |      |
|        |       | LVINSGNGAVEDR                         |    |    | 0.71 | 2.8  | 2    |      |
|        |       | ALSIGFETCR                            |    |    | 0.55 | 3.3  | 2    |      |
|        |       | YGFIEGHVVIPR                          |    |    | 0.53 | 3.8  | 3    |      |
|        |       | TNPEDIYPSNPTDDDSSGSSSER               |    |    | 0.90 | 4.6  | 2    |      |
| P16152 | CBR1  | Carbonyl reductase [NADPH] 1          | 2  | 3  | 5    | 2.46 | 2.80 | 0.05 |
|        |       | LFSGDVLTAR                            |    |    | 2.34 | 2.5  | 2    |      |
|        |       | EYGGDLVLVNAGIAFK                      |    |    | 2.50 | 3.9  | 2    |      |
| P17931 | LEG3  | Galectin_3                            | 3  | 3  | 9    | 2.52 | 2.22 | 0.00 |

|        |       |                                              |    |    |      |      |      |      |
|--------|-------|----------------------------------------------|----|----|------|------|------|------|
|        |       | GNDVAFHFNPR                                  |    |    | 1.69 | 2.4  | 2    |      |
|        |       | IQVLVEPDHFK                                  |    |    | 2.74 | 2.6  | 2    |      |
|        |       | QSVFPFESGKPFK                                |    |    | 2.40 | 2.5  | 2    |      |
| P18065 | IBP2  | Insulin_like growth factor_binding protein 2 | 4  | 4  | 8    | 0.59 | 0.54 | 0.10 |
|        |       | HGLYNLK                                      |    |    | 0.77 | 2.4  | 2    |      |
|        |       | LEGEACGVYTPR                                 |    |    | 0.59 | 2.6  | 2    |      |
|        |       | GECWCVPNTGK                                  |    |    | 0.47 | 2.5  | 2    |      |
|        |       | LAACGPPPVAPPAAVAAVAGGAR                      |    |    | 0.54 | 3.4  | 2    |      |
| P18136 | KV313 | Ig kappa chain V_III region HIC              | 3  | 19 | 158  | 0.97 | 0.19 | 0.00 |
|        |       | LLIYGASSR                                    |    |    | 0.79 | 3.3  | 2    |      |
|        |       | ASQSVSSSYLAWYQQKPGQAPR                       |    |    | 4.84 | 5.0  | 2    |      |
|        |       | FSGSGSGTDFLTISR                              |    |    | 1.00 | 4.7  | 2    |      |
| P18669 | PGAM1 | Phosphoglycerate mutase 1                    | 3  | 5  | 13   | 1.94 | 0.77 | 0.07 |
|        |       | HGESAWNLENR                                  |    |    | 1.94 | 3.4  | 2    |      |
|        |       | YADLTEDQLPSCESLK                             |    |    | 1.48 | 4.8  | 2    |      |
|        |       | FSGWYDADLSPAGHEEAK                           |    |    | 1.30 | 3.1  | 2    |      |
| P19652 | A1AG2 | Alpha_1_acid glycoprotein 2                  | 3  | 6  | 74   | 0.79 | 0.40 | 0.32 |
|        |       | EHVAHLLFLR                                   |    |    | 0.57 | 2.9  | 2    |      |
|        |       | TEDTIFLR                                     |    |    | 0.73 | 3.0  | 2    |      |
|        |       | WFYIASAFR                                    |    |    | 0.92 | 3.7  | 2    |      |
| P19823 | ITIH2 | Inter_alpha_trypsin inhibitor heavy chain H2 | 10 | 14 | 36   | 1.52 | 0.40 | 0.98 |
|        |       | IQPSGGTNINEALLR                              |    |    | 0.92 | 2.9  | 2    |      |
|        |       | FLHVPDTFEGHFDGVPVISK                         |    |    | 1.56 | 4.2  | 4    |      |
|        |       | VQFELHYQEVK                                  |    |    | 0.99 | 2.8  | 2    |      |
|        |       | AEDHFSVIDFNQIR                               |    |    | 1.23 | 3.8  | 3    |      |
|        |       | NVQFNYPHTSVTDVTQNNFHNYFGGSEIVVAGK            |    |    | 1.55 | 4.9  | 4    |      |
|        |       | AHVSFKPTVAQQR                                |    |    | 0.83 | 2.7  | 2    |      |
|        |       | MLADAPPQDPSCCSGALYGSK                        |    |    | 0.80 | 3.2  | 2    |      |
|        |       | VVNNSPQPQNVVFDVQIPK                          |    |    | 1.61 | 4.0  | 2    |      |
|        |       | IYGNQDTSSQLK                                 |    |    | 1.16 | 3.4  | 2    |      |
|        |       | FYNQVSTPLLR                                  |    |    | 1.08 | 2.3  | 2    |      |
| P19827 | ITIH1 | Inter_alpha_trypsin inhibitor heavy chain H1 | 8  | 15 | 79   | 1.02 | 0.35 | 0.13 |
|        |       | AAISGENAGLVR                                 |    |    | 1.08 | 3.1  | 2    |      |
|        |       | FAHYVVTSQVVNTANEAR                           |    |    | 0.98 | 4.3  | 3    |      |
|        |       | QYYEGSEIVVAGR                                |    |    | 0.99 | 3.6  | 2    |      |
|        |       | GFSLDEATNLNGLLR                              |    |    | 1.77 | 4.7  | 2    |      |
|        |       | GSLVQASEANLQAAQDFVR                          |    |    | 1.20 | 5.9  | 2    |      |
|        |       | NHMQYEIVIK                                   |    |    | 1.35 | 2.4  | 2    |      |
|        |       | LDAQASFLPK                                   |    |    | 1.07 | 2.4  | 2    |      |
|        |       | QAVDTAVDGVFIR                                |    |    | 1.72 | 2.5  | 2    |      |
| P19971 | TYPH  | Thymidine phosphorylase                      | 4  | 5  | 6    | 1.71 | 2.20 | 0.63 |
|        |       | FGGAAVFPNQEQR                                |    |    | 1.70 | 2.9  | 2    |      |
|        |       | TLVGVGASLGLR                                 |    |    | 1.84 | 2.5  | 2    |      |
|        |       | VSLVLAPALAACGCK                              |    |    | 2.70 | 2.8  | 2    |      |
|        |       | ALPLALVLHELGAQR                              |    |    | 1.51 | 4.4  | 2    |      |
| P20061 | TCO1  | Transcobalamin_1                             | 2  | 2  | 3    | 2.11 | 2.57 | 0.69 |
|        |       | GTSAVNVVLSLK                                 |    |    | 2.23 | 2.7  | 2    |      |
|        |       | LVGIQIQLMQK                                  |    |    | 0.78 | 2.7  | 2    |      |
| P20142 | PEPC  | Gastricsin                                   | 2  | 3  | 29   | 0.19 | 0.16 | 0.00 |
|        |       | SYYSVYDLGNRR                                 |    |    | 0.16 | 4.4  | 2    |      |

|        |       |                                                       |    |    |       |      |      |      |
|--------|-------|-------------------------------------------------------|----|----|-------|------|------|------|
|        |       | GLLGEFLR                                              |    |    | 0.21  | 2.5  | 2    |      |
| P20742 | PZP   | Pregnancy zone protein                                | 6  | 8  | 38    | 1.64 | 0.82 | 0.14 |
|        |       | YGAATFTR                                              |    |    | 1.04  | 2.4  | 2    |      |
|        |       | SSGSLLNNAIK                                           |    |    | 1.39  | 3.3  | 2    |      |
|        |       | ATVLNLYPK                                             |    |    | 2.83  | 3.0  | 2    |      |
|        |       | AGAFCLSEDAGLGISSTASLR                                 |    |    | 1.34  | 5.6  | 2    |      |
|        |       | MVSGFIPLKPTVK                                         |    |    | 2.32  | 2.8  | 2    |      |
|        |       | MVSGFIPLKPTVK+Oxidation(0)                            |    |    | 1.09  | 3.0  | 2    |      |
| P20810 | ICAL  | Calpastatin                                           | 2  | 2  | 3     | 0.86 | 1.07 | 0.59 |
|        |       | DTMSDQALEALSASLGTR+Oxidation(2)                       |    |    | 0.59  | 2.4  | 2    |      |
|        |       | GTVPDDAVEALADSLGK                                     |    |    | 1.23  | 3.5  | 2    |      |
| P21333 | FLNA  | Filamin_A                                             | 25 | 33 | 65    | 7.12 | 0.47 | 0.00 |
|        |       | YGGPYHIGGSPFK                                         |    |    | 2.89  | 3.3  | 2    |      |
|        |       | YTPVQQGPVGVNVTYGGDPIPK                                |    |    | 2.81  | 4.8  | 2    |      |
|        |       | DGSCGVAYVVQEPGDYEVSVK                                 |    |    | 1.18  | 3.4  | 2    |      |
|        |       | AEAGVPAEFSIWTR                                        |    |    | 2.59  | 3.2  | 2    |      |
|        |       | ALGALVDSCAPGLCPDWDSWDASKPVTNAR                        |    |    | 2.41  | 4.2  | 3    |      |
|        |       | AFGPGLQGGGAGSPAR                                      |    |    | 13.68 | 2.4  | 2    |      |
|        |       | EAGAGGLAIAVEGPSK                                      |    |    | 4.75  | 4.1  | 2    |      |
|        |       | VNQPASFAVSLNGAK                                       |    |    | 3.03  | 2.9  | 2    |      |
|        |       | VQVQDNEGCPVEALVK                                      |    |    | 3.47  | 4.3  | 2    |      |
|        |       | IANLQTDLSDGLR                                         |    |    | 2.98  | 3.2  | 2    |      |
|        |       | GLVEPVDVVDNADGTQTVNYVPSR                              |    |    | 0.91  | 5.7  | 2    |      |
|        |       | SPFSVAVSPSLDLSK                                       |    |    | 3.88  | 3.2  | 2    |      |
|        |       | AWGPGLEGGVVGK                                         |    |    | 3.19  | 2.5  | 2    |      |
|        |       | VEYTPYEEGLHSVDVTYDGSPVPSSPFQVPVTEGCDPSR               |    |    | 1.57  | 5.3  | 3    |      |
|        |       | VTAQGGLEPSGNIANK                                      |    |    | 12.07 | 4.0  | 2    |      |
|        |       | GAGTGGLGLAVEGPSEAK                                    |    |    | 4.37  | 3.4  | 2    |      |
|        |       | DAGEGGLSLAIEGPSK                                      |    |    | 3.21  | 3.8  | 2    |      |
|        |       | VDVGKDQEFTVK                                          |    |    | 5.69  | 2.8  | 2    |      |
|        |       | TGVELGKPTHFTVNAK                                      |    |    | 1.69  | 2.8  | 2    |      |
|        |       | YNEQHVPGPSPTAR                                        |    |    | 10.49 | 2.8  | 2    |      |
|        |       | DVDIIDHHDNTYTVK                                       |    |    | 16.33 | 3.3  | 2    |      |
|        |       | AYGPGIEPTGNMVK                                        |    |    | 5.73  | 2.7  | 2    |      |
|        |       | LDVQFSGLTK                                            |    |    | 3.59  | 2.3  | 2    |      |
|        |       | FNEEHIPDSPFVVPVSPSGDAR                                |    |    | 4.11  | 3.7  | 2    |      |
|        |       | IPEISIQDMTAQVTSPSGK                                   |    |    | 1.87  | 4.2  | 2    |      |
| P21695 | GPDA  | Glycerol_3_phosphate dehydrogenase [NAD_]_cytoplasmic | 2  | 2  | 2     | 1.20 | 1.08 | 0.25 |
|        |       | IVGGNAAQLAQFDPR                                       |    |    | 1.16  | 2.6  | 2    |      |
|        |       | NVVAVGAGFCDGLGFGDNTK                                  |    |    | 1.46  | 2.7  | 2    |      |
| P21796 | VDAC1 | Voltage_dependent anion_selective channel protein 1   | 4  | 4  | 4     | 3.00 | 7.46 | 0.47 |
|        |       | SENGLEFTSSGSANTETTK                                   |    |    | 10.72 | 4.8  | 2    |      |
|        |       | YQIDPDACFSAK                                          |    |    | 4.72  | 2.4  | 2    |      |
|        |       | VNNSSLIGLGYTQTLKPGIK                                  |    |    | 2.38  | 2.5  | 2    |      |
|        |       | WNTDNTLGTEITVEDQLAR                                   |    |    | 4.68  | 3.8  | 2    |      |
| P21980 | TGM2  | Protein_glutamine gamma_glutamyltransferase 2         | 7  | 10 | 34    | 5.02 | 4.96 | 0.19 |
|        |       | SEGTYCCGPVPVR                                         |    |    | 6.57  | 3.4  | 2    |      |
|        |       | TVSYNGILGPECGTK                                       |    |    | 4.27  | 3.4  | 2    |      |
|        |       | TVEIPDPVEAGEEVK                                       |    |    | 5.48  | 3.3  | 2    |      |

|        |       |                                             |    |    |       |      |      |      |
|--------|-------|---------------------------------------------|----|----|-------|------|------|------|
|        |       | DLYLENPEIK                                  |    |    | 4.76  | 2.9  | 1    |      |
|        |       | NYEASVDSLTFVVTGPAPSQEAGTK                   |    |    | 2.53  | 4.6  | 3    |      |
|        |       | CDLELETNGR                                  |    |    | 5.43  | 2.9  | 2    |      |
|        |       | YRDCLTESNLIK                                |    |    | 11.92 | 3.0  | 2    |      |
| P22314 | UBA1  | Ubiquitin_like modifier_activating enzyme 1 | 6  | 7  | 17    | 1.06 | 0.49 | 0.02 |
|        |       | AENYDIPSADR                                 |    |    | 0.91  | 2.7  | 2    |      |
|        |       | LQTSSVLVGLR                                 |    |    | 0.68  | 2.9  | 2    |      |
|        |       | AAVATFLQSVQVPEFTPK                          |    |    | 1.63  | 2.5  | 2    |      |
|        |       | ALPAVQQNNLDEDLIR                            |    |    | 1.33  | 4.6  | 2    |      |
|        |       | NEEDAAELVALAQAVNAR                          |    |    | 0.80  | 4.1  | 2    |      |
|        |       | DNPGVVTCLDEAR                               |    |    | 1.35  | 2.9  | 2    |      |
| P22897 | MRC1  | Macrophage mannose receptor 1               | 17 | 28 | 106   | 1.26 | 0.24 | 0.63 |
|        |       | IYGTTDNLCSR                                 |    |    | 1.01  | 2.5  | 2    |      |
|        |       | FQWHEAETYCK                                 |    |    | 1.15  | 3.4  | 2    |      |
|        |       | ALGGDLASINNKEEQTIWR                         |    |    | 1.20  | 3.7  | 3    |      |
|        |       | ACIGFGGNLVSIQNEK                            |    |    | 1.06  | 4.5  | 2    |      |
|        |       | SSLSYEDADCVVIIIGGASNEAGK                    |    |    | 1.09  | 5.0  | 2    |      |
|        |       | GCEWPLGYICK                                 |    |    | 1.42  | 3.1  | 2    |      |
|        |       | FEGSESLWNKDPLTSVSYQINSK                     |    |    | 1.14  | 3.8  | 2    |      |
|        |       | YFWTGLSDIQTK                                |    |    | 1.42  | 3.5  | 2    |      |
|        |       | TGIAGGLWDVLK                                |    |    | 1.22  | 4.0  | 2    |      |
|        |       | YTNWAADEPK                                  |    |    | 0.94  | 3.1  | 2    |      |
|        |       | SQGPEIVEVEK                                 |    |    | 0.91  | 2.4  | 2    |      |
|        |       | YLNWLPGSPSAEPGK                             |    |    | 1.10  | 2.6  | 2    |      |
|        |       | DYQYYFSK                                    |    |    | 2.10  | 2.2  | 1    |      |
|        |       | NFGDLVSIQSESEKK                             |    |    | 0.85  | 2.8  | 2    |      |
|        |       | SALTWHQAR                                   |    |    | 0.70  | 2.5  | 2    |      |
|        |       | NFGDLVSIQSESEK                              |    |    | 0.45  | 3.0  | 2    |      |
|        |       | WVSESQIMSVAFK                               |    |    | 1.48  | 2.5  | 2    |      |
| P23141 | EST1  | Liver carboxylesterase 1                    | 3  | 6  | 21    | 5.63 | 5.52 | 0.54 |
|        |       | EGYLQIGANTQAAQK                             |    |    | 9.76  | 4.1  | 2    |      |
|        |       | AISESGVALTSVLVK                             |    |    | 7.29  | 4.7  | 2    |      |
|        |       | KGDVKPLAEQIAITAGCK                          |    |    | 2.38  | 5.0  | 3    |      |
| P23142 | FBLN1 | Fibulin_1                                   | 5  | 6  | 13    | 1.44 | 1.21 | 0.44 |
|        |       | TGYYFDGISR                                  |    |    | 1.67  | 3.0  | 2    |      |
|        |       | MCVDVNECQR                                  |    |    | 1.43  | 3.3  | 2    |      |
|        |       | CVDVDECAPPAEPCGK                            |    |    | 0.80  | 4.2  | 2    |      |
|        |       | SQETGDLDVGGLQETDK                           |    |    | 1.46  | 3.8  | 2    |      |
|        |       | SQETGDLDVGGLQETDKIIIEVEEQEDPYLNDR           |    |    | 4.54  | 4.9  | 3    |      |
| P23381 | SYWC  | Tryptophanyl_tRNA synthetase_cytoplasmic    | 5  | 5  | 7     | 1.17 | 0.95 | 0.62 |
|        |       | AGNASKDEIDSAVK                              |    |    | 0.54  | 3.4  | 2    |      |
|        |       | MSASDPNSSIFLTD TAK                          |    |    | 1.17  | 3.7  | 2    |      |
|        |       | ISFPAIQAAPSFSNSFPQIFR                       |    |    | 1.19  | 2.5  | 2    |      |
|        |       | GIFGFTSDCIGK                                |    |    | 1.85  | 3.9  | 2    |      |
|        |       | DLTLDQAYS YAVENAK                           |    |    | 1.53  | 4.1  | 2    |      |
| P23528 | COF1  | Cofilin_1                                   | 5  | 17 | 132   | 1.56 | 0.48 | 0.00 |
|        |       | HELQANCYEEVKDR                              |    |    | 1.90  | 6.2  | 3    |      |
|        |       | HELQANCYEEVK                                |    |    | 3.01  | 4.3  | 2    |      |
|        |       | LGGSAVISLEGKPL                              |    |    | 1.22  | 4.3  | 2    |      |
|        |       | EILVG DVGQTVDDPYATFVK                       |    |    | 0.63  | 5.5  | 2    |      |

|        |       |                                           |   |   |       |      |      |      |
|--------|-------|-------------------------------------------|---|---|-------|------|------|------|
|        |       | NIILEEGKEILVGDVGQTVDDPYATFVK              |   |   | 1.89  | 7.4  | 3    |      |
| P25311 | ZA2G  | Zinc_alpha_2_glycoprotein                 | 2 | 3 | 11    | 0.83 | 0.55 | 0.88 |
|        |       | EIPAWVPFDPAAQITK                          |   |   | 0.84  | 3.2  | 2    |      |
|        |       | AYLEEECPATLR                              |   |   | 0.79  | 3.1  | 2    |      |
| P25705 | ATPA  | ATP synthase subunit alpha_mitochondrial  | 7 | 7 | 8     | 5.14 | 2.43 | 0.43 |
|        |       | VVDALGNAIDGK                              |   |   | 17.96 | 2.5  | 2    |      |
|        |       | HALIYDDLK                                 |   |   | 8.37  | 2.3  | 2    |      |
|        |       | TGTAEMSSILEER                             |   |   | 2.70  | 3.0  | 2    |      |
|        |       | ILGADTSVDLEETGR                           |   |   | 1.16  | 3.1  | 2    |      |
|        |       | TSIAIDIINQK                               |   |   | 17.03 | 2.7  | 2    |      |
|        |       | TGAIVDVPVGEELLGR                          |   |   | 4.09  | 3.1  | 2    |      |
|        |       | GMSLNLEPDNVGVVFGNDK                       |   |   | 4.89  | 4.3  | 2    |      |
| P26038 | MOES  | Moesin                                    | 6 | 9 | 43    | 1.18 | 0.51 | 1.00 |
|        |       | ESEAVEWQQK                                |   |   | 1.18  | 3.1  | 2    |      |
|        |       | ALTSELANAR                                |   |   | 1.33  | 2.6  | 2    |      |
|        |       | TQEQLALEMAELTAR                           |   |   | 1.20  | 4.8  | 2    |      |
|        |       | TAMSTPHVAEPAENEQDEQDENGAEASADLR           |   |   | 0.82  | 5.5  | 3    |      |
|        |       | IQVWHEEHR                                 |   |   | 1.20  | 2.4  | 2    |      |
|        |       | KTQEQLALEMAELTAR                          |   |   | 1.02  | 4.0  | 2    |      |
| P27487 | DPP4  | Dipeptidyl peptidase 4                    | 2 | 2 | 4     | 0.43 | 0.38 | 0.00 |
|        |       | LGTFEVEDQIEAAR                            |   |   | 0.49  | 3.4  | 2    |      |
|        |       | VLEDNSALDK                                |   |   | 0.40  | 2.4  | 2    |      |
| P27797 | CALR  | Calreticulin                              | 3 | 4 | 5     | 1.02 | 0.78 | 0.51 |
|        |       | FYALSASFEPFSNK                            |   |   | 1.02  | 3.7  | 2    |      |
|        |       | HEQNIDCGGGYVK                             |   |   | 3.24  | 3.4  | 2    |      |
|        |       | IKDPDASKPEDWDER                           |   |   | 11.15 | 3.9  | 2    |      |
| P27824 | CALX  | Calnexin                                  | 2 | 2 | 3     | 0.82 | 1.55 | 0.41 |
|        |       | EEEEKEEEKDK                               |   |   | 0.64  | 2.4  | 2    |      |
|        |       | IVDDWANDGWGLK                             |   |   | 2.88  | 2.5  | 2    |      |
| P28325 | CYTD  | Cystatin_D                                | 2 | 4 | 4     | 0.08 | 0.07 | 0.71 |
|        |       | TLAGGIHATDLNDK                            |   |   | 0.00  | 4.3  | 2    |      |
|        |       | SQPNLDNCPFNDQPK                           |   |   | 0.08  | 3.6  | 2    |      |
| P28838 | AMPL  | Cytosol aminopeptidase                    | 3 | 3 | 9     | 1.04 | 1.15 | 1.00 |
|        |       | TIQVDNTDAEGR                              |   |   | 0.93  | 2.9  | 2    |      |
|        |       | LYGSGDQEAQWQK                             |   |   | 1.15  | 2.7  | 2    |      |
|        |       | GVLFASGQNLAR                              |   |   | 1.05  | 3.2  | 2    |      |
| P29401 | TKT   | Transketolase                             | 6 | 8 | 17    | 0.88 | 0.51 | 0.73 |
|        |       | AVELAANTK                                 |   |   | 0.62  | 2.4  | 2    |      |
|        |       | SKDDQVTIGAGVTLHEALAAELLK                  |   |   | 1.25  | 4.9  | 4    |      |
|        |       | ILATPPQEDAPSVDIANIR                       |   |   | 0.94  | 4.2  | 2    |      |
|        |       | TSRPENAIYNNNEDFQVGQAK                     |   |   | 1.00  | 4.8  | 3    |      |
|        |       | SVPTSTVFYPSDGVATEK                        |   |   | 0.98  | 3.1  | 2    |      |
|        |       | LDNLVAILDINR                              |   |   | 0.61  | 2.9  | 2    |      |
| P29508 | SPB3  | Serpin B3                                 | 4 | 7 | 36    | 0.95 | 0.68 | 1.00 |
|        |       | FKVEESYDLK                                |   |   | 0.74  | 2.7  | 2    |      |
|        |       | VLHFDQVTENTTGK                            |   |   | 0.78  | 3.9  | 2    |      |
|        |       | GLVLSGVLHK                                |   |   | 1.16  | 2.9  | 2    |      |
|        |       | FYQTSVESVDFANAPEESR                       |   |   | 0.83  | 4.8  | 2    |      |
| P30040 | ERP29 | Endoplasmic reticulum resident protein 29 | 2 | 2 | 2     | 1.15 | 1.00 | 0.59 |
|        |       | FDTQYPYGEK                                |   |   | 0.99  | 2.3  | 2    |      |

|        |       |                                                        |   |    |       |      |      |      |
|--------|-------|--------------------------------------------------------|---|----|-------|------|------|------|
|        |       | DGFENPVPYTGAVK                                         |   |    | 8.06  | 3.5  | 2    |      |
| P30041 | PRDX6 | Peroxiredoxin_6                                        | 3 | 4  | 27    | 1.79 | 1.09 | 0.01 |
|        |       | DINAYNCEEPTEK                                          |   |    | 1.80  | 3.8  | 2    |      |
|        |       | VVISLQLTAEK                                            |   |    | 1.74  | 3.0  | 2    |      |
|        |       | LSILYPATTGR                                            |   |    | 0.89  | 2.3  | 2    |      |
| P30043 | BLVRB | Flavin reductase                                       | 4 | 4  | 7     | 1.70 | 0.55 | 0.10 |
|        |       | TVAGQDAVIVLLGTR                                        |   |    | 0.66  | 3.0  | 2    |      |
|        |       | NDLSPTTVMSEGAR                                         |   |    | 1.07  | 2.3  | 2    |      |
|        |       | YVAVMPPHIGDQPLTGAYTVTLTDGR+Oxidation(4)                |   |    | 1.38  | 3.8  | 3    |      |
|        |       | YVAVMPPHIGDQPLTGAYTVTLTDGR                             |   |    | 1.90  | 3.6  | 3    |      |
| P30044 | PRDX5 | Peroxiredoxin_5_mitochondrial                          | 9 | 24 | 144   | 0.85 | 0.26 | 0.00 |
|        |       | LLADPTGAFGK                                            |   |    | 0.62  | 2.7  | 2    |      |
|        |       | THLPGFVEQAEALK                                         |   |    | 1.18  | 3.8  | 3    |      |
|        |       | FSMVVQDGIVK                                            |   |    | 0.78  | 3.6  | 2    |      |
|        |       | VNLAELFK                                               |   |    | 1.17  | 2.9  | 2    |      |
|        |       | VGDAIPAVEVFEGEPGNK                                     |   |    | 0.75  | 5.0  | 2    |      |
|        |       | GVLFGVPGAFTPGCSK                                       |   |    | 1.41  | 4.4  | 2    |      |
|        |       | ETDLLLDDSLVSIFGNR                                      |   |    | 1.03  | 4.4  | 2    |      |
|        |       | ALNVEPDGTGLTCSLAPNIISQL                                |   |    | 1.05  | 4.3  | 2    |      |
|        |       | FSMVVQDGIVK+Oxidation(2)                               |   |    | 0.93  | 3.7  | 2    |      |
| P30048 | PRDX3 | Thioredoxin_dependent peroxide reductase_mitochondrial | 2 | 4  | 14    | 0.25 | 0.57 | 0.25 |
|        |       | DLSLDDFK                                               |   |    | 0.25  | 2.2  | 1    |      |
|        |       | DYGVLLLEGSLALR                                         |   |    | 19.77 | 3.6  | 2    |      |
| P30050 | RL12  | 60S ribosomal protein L12                              | 2 | 2  | 2     | 0.86 | 1.04 | 0.14 |
|        |       | EILGTAQSVGCNVDGR                                       |   |    | 0.83  | 3.0  | 2    |      |
|        |       | CTGGEVGATSALAPK                                        |   |    | 2.47  | 2.3  | 2    |      |
| P30086 | PEBP1 | Phosphatidylethanolamine_binding protein 1             | 4 | 7  | 45    | 1.90 | 0.95 | 0.00 |
|        |       | NRPTSISWDGLDSGK                                        |   |    | 2.07  | 4.1  | 2    |      |
|        |       | GNDISSGTVLSDYVGSPPK                                    |   |    | 1.90  | 5.2  | 2    |      |
|        |       | WSGPLSLQEVDQPHPLHVTYAGAAVDELGK                         |   |    | 2.25  | 4.9  | 4    |      |
|        |       | LYTLVLTDPDAPSR                                         |   |    | 1.42  | 3.3  | 2    |      |
| P30740 | ILEU  | Leukocyte elastase inhibitor                           | 6 | 8  | 42    | 1.09 | 0.53 | 1.00 |
|        |       | KIEEQLTLEK                                             |   |    | 1.19  | 3.5  | 2    |      |
|        |       | LGVQDLFNSSK                                            |   |    | 1.13  | 3.1  | 2    |      |
|        |       | HNSSGSILFLGR                                           |   |    | 1.07  | 2.6  | 2    |      |
|        |       | TYGADLASVDFQHASEDAR                                    |   |    | 0.92  | 4.3  | 2    |      |
|        |       | IEEQLTLEK                                              |   |    | 0.97  | 2.7  | 2    |      |
|        |       | LEESYTLNSDLAR                                          |   |    | 0.81  | 2.9  | 2    |      |
| P30838 | AL3A1 | Aldehyde dehydrogenase family 3 member A1              | 9 | 13 | 58    | 3.33 | 0.89 | 0.00 |
|        |       | LIQEQEQELVGALAADLHK                                    |   |    | 5.27  | 5.8  | 3    |      |
|        |       | SLEEAIQFINQR                                           |   |    | 5.06  | 3.6  | 3    |      |
|        |       | IQQLEALQR                                              |   |    | 3.72  | 3.3  | 2    |      |
|        |       | NCDLDVACR                                              |   |    | 3.30  | 2.6  | 2    |      |
|        |       | VMGLIEGQK                                              |   |    | 4.16  | 2.7  | 2    |      |
|        |       | FDHILYTGSTGVGK                                         |   |    | 5.68  | 3.3  | 2    |      |
|        |       | SCLVRPLMNDEGLK                                         |   |    | 0.35  | 3.1  | 2    |      |
|        |       | LPEWAADEPVEK                                           |   |    | 3.53  | 3.4  | 2    |      |
|        |       | FMNSGQTCVAPDYILCDPSIQNQIVEK                            |   |    | 2.98  | 3.5  | 3    |      |
| P31146 | COR1A | Coronin_1A                                             | 2 | 2  | 4     | 1.51 | 1.90 | 0.75 |



|        |       |                                                |    |    |      |      |      |      |
|--------|-------|------------------------------------------------|----|----|------|------|------|------|
|        |       | AAPEASGTPSSDAVSR                               |    |    | 0.40 | 3.9  | 2    |      |
|        |       | KLQATVQELQK                                    |    |    | 1.88 | 2.5  | 2    |      |
| P31946 | 1433B | 14_3_3 protein beta/alpha                      | 3  | 4  | 29   | 1.36 | 1.27 | 1.00 |
|        |       | AVTEQGHLSNEER                                  |    |    | 0.97 | 4.5  | 2    |      |
|        |       | YLSEVASGDNK                                    |    |    | 1.23 | 2.7  | 2    |      |
|        |       | YLIPNATQPESK                                   |    |    | 1.37 | 2.6  | 2    |      |
| P32119 | PRDX2 | Peroxiredoxin_2                                | 3  | 7  | 31   | 1.53 | 0.86 | 1.00 |
|        |       | QITVNDLPVGR                                    |    |    | 1.53 | 2.7  | 2    |      |
|        |       | KEGGLGPLNIPLLADVTR                             |    |    | 0.93 | 4.8  | 2    |      |
|        |       | EGGLGPLNIPLLADVTR                              |    |    | 0.89 | 3.8  | 2    |      |
| P32455 | GBP1  | Interferon_induced guanylate_binding protein 1 | 2  | 2  | 4    | 2.17 | 3.53 | 0.20 |
|        |       | IMKNEIQDLQTK+Oxidation(1)                      |    |    | 2.06 | 2.8  | 2    |      |
|        |       | TLSGGIQVNGPR                                   |    |    | 3.31 | 2.4  | 2    |      |
| P33241 | LSP1  | Lymphocyte_specific protein 1                  | 2  | 2  | 4    | 1.14 | 0.70 | 0.26 |
|        |       | QQHEGAQGALDSGEPQCR                             |    |    | 1.06 | 3.9  | 3    |      |
|        |       | WETGEVQAQSAAK                                  |    |    | 6.67 | 2.5  | 2    |      |
| P35237 | SPB6  | Serpin B6                                      | 3  | 4  | 12   | 1.15 | 0.94 | 1.00 |
|        |       | IAELSPGSVDPLTR                                 |    |    | 1.16 | 3.2  | 2    |      |
|        |       | ADFGMSQTDLSLSK                                 |    |    | 0.92 | 3.2  | 2    |      |
|        |       | GNTAAQMAQILSFNK                                |    |    | 1.00 | 2.8  | 2    |      |
| P35241 | RADI  | Radixin                                        | 3  | 5  | 18   | 0.98 | 0.45 | 1.00 |
|        |       | RKPDTIEVQQMK+Oxidation(10)                     |    |    | 0.99 | 3.7  | 3    |      |
|        |       | RKPDTIEVQQMK                                   |    |    | 0.98 | 3.7  | 2    |      |
|        |       | IGFPWSEIR                                      |    |    | 0.98 | 3.2  | 2    |      |
| P35247 | SFTPD | Pulmonary surfactant_associated protein D      | 8  | 32 | 330  | 0.41 | 0.11 | 0.00 |
|        |       | NEAFLSMTDSK+Oxidation(7)                       |    |    | 0.46 | 4.3  | 2    |      |
|        |       | KVELFPNGQSVGEK                                 |    |    | 0.44 | 4.4  | 2    |      |
|        |       | VELFPNGQSVGEK                                  |    |    | 0.35 | 2.9  | 2    |      |
|        |       | NEAFLSMTDSK                                    |    |    | 0.44 | 4.5  | 2    |      |
|        |       | GESGLPDVASLR                                   |    |    | 0.39 | 3.3  | 2    |      |
|        |       | SAAENAALQQLVAK                                 |    |    | 0.41 | 5.6  | 3    |      |
|        |       | QQVEALQGQVQHLQAAFSQYK                          |    |    | 0.74 | 4.5  | 3    |      |
|        |       | TAGFVKPFTEAQLLCTQAGGLASPR                      |    |    | 0.57 | 5.1  | 2    |      |
| P35527 | K1C9  | Keratin_type I cytoskeletal 9                  | 4  | 5  | 10   | 1.71 | 1.13 | 0.04 |
|        |       | GGSGGSHGGSGFGGSGGSGGGEEASGSGGGYGGGSGK          |    |    | 1.39 | 7.8  | 3    |      |
|        |       | DIENQYETQITQIEHEVSSSGQEVQSSAK                  |    |    | 1.84 | 3.8  | 3    |      |
|        |       | GGSGGSGGGGSGGGYGGGSGSR                         |    |    | 1.35 | 3.6  | 2    |      |
|        |       | VQALEEANNDLENK                                 |    |    | 1.96 | 3.7  | 2    |      |
| P35579 | MYH9  | Myosin_9                                       | 19 | 30 | 69   | 1.82 | 0.29 | 0.16 |
|        |       | IAEFTTNLTETEEEK                                |    |    | 1.21 | 3.8  | 2    |      |
|        |       | QEEEMMAKEEELVK                                 |    |    | 0.96 | 2.4  | 2    |      |
|        |       | EQADFAIEALAK                                   |    |    | 1.26 | 3.0  | 2    |      |
|        |       | LQVELDNVTGLLSQSDSK                             |    |    | 1.14 | 5.1  | 2    |      |
|        |       | QLLQANPILEAFGNAK                               |    |    | 1.86 | 3.7  | 2    |      |
|        |       | VISGVLQLGNIVFK                                 |    |    | 1.26 | 3.9  | 2    |      |
|        |       | IIGLDQVAGMSETALPGAFK                           |    |    | 1.74 | 3.7  | 2    |      |
|        |       | NFINNPLAQADWAAK                                |    |    | 1.36 | 4.5  | 2    |      |
|        |       | ELEDATETADAMNR                                 |    |    | 0.87 | 3.4  | 2    |      |
|        |       | THEAQIQEMR+Oxidation(8)                        |    |    | 0.80 | 2.5  | 2    |      |
|        |       | RQLEEAEEEEAQR                                  |    |    | 3.28 | 3.2  | 2    |      |

|        |       |                                                                        |   |    |      |      |      |      |
|--------|-------|------------------------------------------------------------------------|---|----|------|------|------|------|
|        |       | IAQLEEQLDNETK                                                          |   |    | 1.90 | 3.6  | 2    |      |
|        |       | TQLEEELEDELQATEDAK                                                     |   |    | 1.18 | 4.6  | 2    |      |
|        |       | IIGLDQVAGMSETALPGAFK+Oxidation(9)                                      |   |    | 2.21 | 2.9  | 2    |      |
|        |       | DLEAHIDSANK                                                            |   |    | 8.39 | 2.5  | 2    |      |
|        |       | ELEDATETADAMNR+Oxidation(11)                                           |   |    | 9.53 | 3.8  | 2    |      |
|        |       | EDQSILCTGESGAGK                                                        |   |    | 2.46 | 3.3  | 2    |      |
|        |       | DELADEIANSSGK                                                          |   |    | 2.39 | 2.6  | 2    |      |
|        |       | TDLLEPYNK                                                              |   |    | 1.83 | 2.7  | 2    |      |
| P35749 | MYH11 | Myosin_11                                                              | 2 | 2  | 10   | 4.01 | 4.03 | 0.00 |
|        |       | ALEEALAK                                                               |   |    | 4.26 | 2.7  | 2    |      |
|        |       | ASRDEIFATAKENEK                                                        |   |    | 2.62 | 2.5  | 2    |      |
| P35754 | GLRX1 | Glutaredoxin_1                                                         | 2 | 4  | 13   | 1.61 | 1.49 | 0.36 |
|        |       | AQEILSQLPIK                                                            |   |    | 1.87 | 3.1  | 2    |      |
|        |       | DCIGGCSDLVSLQQSGELLTR                                                  |   |    | 1.58 | 5.2  | 3    |      |
| P35858 | ALS   | Insulin_like growth factor_binding protein complex acid labile subunit | 2 | 2  | 6    | 1.05 | 0.80 | 1.00 |
|        |       | NLIAAVAPGAFGLK                                                         |   |    | 1.05 | 2.4  | 2    |      |
|        |       | LEALPNSLLAPLGR                                                         |   |    | 1.15 | 2.8  | 2    |      |
| P35908 | K22E  | Keratin_type II cytoskeletal 2 epidermal                               | 6 | 6  | 14   | 1.27 | 0.96 | 0.03 |
|        |       | GFSSGSAVVSGGSR                                                         |   |    | 6.72 | 3.6  | 2    |      |
|        |       | GGGFGGSSFGGGSGFSGGGFSGGGFSGGGR                                         |   |    | 1.21 | 2.7  | 2    |      |
|        |       | YEELQVTVGR                                                             |   |    | 4.80 | 3.1  | 2    |      |
|        |       | GGSGGGGSGGGYSGGGGSGGR                                                  |   |    | 4.06 | 4.8  | 2    |      |
|        |       | VDLLNQIEIFLK                                                           |   |    | 2.56 | 3.2  | 2    |      |
|        |       | YLDGLTAER                                                              |   |    | 2.94 | 2.6  | 2    |      |
| P36222 | CH3L1 | Chitinase_3_like protein 1                                             | 2 | 4  | 11   | 0.61 | 0.52 | 0.24 |
|        |       | GNQWVGYYDDQESVK                                                        |   |    | 0.53 | 2.7  | 2    |      |
|        |       | SFTLASSETGVGAPISGPGIPGR                                                |   |    | 0.98 | 3.9  | 2    |      |
| P36871 | PGM1  | Phosphoglucomutase_1                                                   | 3 | 5  | 21   | 0.55 | 0.56 | 0.45 |
|        |       | LSGTGSAGATIR                                                           |   |    | 0.92 | 3.2  | 2    |      |
|        |       | YDYEEVEAEGANK                                                          |   |    | 0.48 | 3.3  | 2    |      |
|        |       | FNISNGGPAPEAITDK                                                       |   |    | 1.32 | 3.1  | 2    |      |
| P36955 | PEDF  | Pigment epithelium_derived factor                                      | 6 | 14 | 64   | 1.08 | 0.29 | 0.99 |
|        |       | YGLDSDLCK                                                              |   |    | 0.99 | 3.2  | 2    |      |
|        |       | LQSLFDSPDFSK                                                           |   |    | 1.08 | 3.4  | 2    |      |
|        |       | DTDTGALLFIGK                                                           |   |    | 0.82 | 3.0  | 2    |      |
|        |       | LDLQEINNWWQAQMK                                                        |   |    | 1.00 | 4.7  | 2    |      |
|        |       | TVQAVLTVPK                                                             |   |    | 0.93 | 2.8  | 2    |      |
|        |       | ELLDTVTAPQK                                                            |   |    | 1.03 | 3.4  | 2    |      |
| P36980 | FHR2  | Complement factor H_related protein 2                                  | 2 | 3  | 21   | 1.32 | 0.81 | 0.49 |
|        |       | LQNNENNISCVER                                                          |   |    | 1.44 | 3.8  | 2    |      |
|        |       | ITCAEEGWSPPK                                                           |   |    | 1.29 | 3.4  | 2    |      |
| P37802 | TAGL2 | Transgelin_2                                                           | 7 | 9  | 68   | 1.74 | 0.97 | 0.00 |
|        |       | NFSDNQLQEGK                                                            |   |    | 0.99 | 3.5  | 2    |      |
|        |       | TLMNLGGLAVAR                                                           |   |    | 2.12 | 3.8  | 2    |      |
|        |       | DDGLFSGDPNWFPK                                                         |   |    | 1.77 | 4.2  | 2    |      |
|        |       | NVIGLQMGTR                                                             |   |    | 2.85 | 2.9  | 2    |      |
|        |       | QMEQISQFLQAAER                                                         |   |    | 1.34 | 3.8  | 2    |      |
|        |       | TLMNLGGLAVAR+Oxidation(2)                                              |   |    | 1.72 | 3.0  | 2    |      |
|        |       | QMEQISQFLQAAER+Oxidation(1)                                            |   |    | 1.87 | 3.3  | 2    |      |
| P37837 | TALDO | Transaldolase                                                          | 3 | 4  | 17   | 2.09 | 0.51 | 0.03 |

|        |       |                                                  |   |    |       |       |      |      |
|--------|-------|--------------------------------------------------|---|----|-------|-------|------|------|
|        |       | SYELEDPGVK                                       |   |    | 0.50  | 2.6   | 2    |      |
|        |       | LLGELLQDNAK                                      |   |    | 1.78  | 3.4   | 2    |      |
|        |       | ALAGCDFLTISPK                                    |   |    | 2.18  | 3.0   | 2    |      |
| P38646 | GRP75 | Stress_70 protein_mitochondrial                  | 7 | 7  | 7     | 59.62 | 5.30 | 0.30 |
|        |       | EQQIVIQSSGGLSK                                   |   |    | 62.40 | 3.5   | 2    |      |
|        |       | SQVFSTAADGQTQVEIK                                |   |    | 13.52 | 2.9   | 2    |      |
|        |       | TTPSVVAFTADGER                                   |   |    | 11.55 | 3.1   | 2    |      |
|        |       | DAGQISGLNVLR                                     |   |    | 13.11 | 3.1   | 2    |      |
|        |       | VINEPTAAALAYGLDK                                 |   |    | 16.89 | 3.7   | 2    |      |
|        |       | GAVVGIDLGTNSCVAVMEGK                             |   |    | 2.49  | 4.6   | 2    |      |
|        |       | STNGDTFLGGEDFDQALLR                              |   |    | 3.91  | 4.3   | 2    |      |
| P40121 | CAPG  | Macrophage_capping protein                       | 8 | 10 | 33    | 0.98  | 1.07 | 0.12 |
|        |       | YQEGGVESAFHK                                     |   |    | 0.90  | 3.4   | 2    |      |
|        |       | VSDATGQMNLTK                                     |   |    | 3.73  | 4.0   | 2    |      |
|        |       | EGNPEEDLTADK                                     |   |    | 2.74  | 2.8   | 2    |      |
|        |       | MQYAPNTQVEILPQGHESPIFK                           |   |    | 1.84  | 3.8   | 3    |      |
|        |       | AQVEIVTDGEEPAEMIQVLGPKPALK                       |   |    | 3.17  | 3.9   | 3    |      |
|        |       | ANAQAAALYK                                       |   |    | 4.12  | 3.0   | 2    |      |
|        |       | QAALQVAEGFISR                                    |   |    | 1.64  | 3.1   | 2    |      |
|        |       | VSDATGQMNLTK+Oxidation(7)                        |   |    | 4.07  | 2.9   | 2    |      |
| P40394 | ADH7  | Alcohol dehydrogenase class 4 mu/sigma chain     | 4 | 5  | 13    | 0.96  | 1.40 | 0.62 |
|        |       | AMAVGATECISPK                                    |   |    | 2.39  | 2.7   | 2    |      |
|        |       | VCLIGCGFSTGYGAAVK                                |   |    | 0.69  | 3.8   | 2    |      |
|        |       | ISEGFELLNSGQSIR                                  |   |    | 1.57  | 3.8   | 2    |      |
|        |       | FPVIVGHEATGIVESIGEGVTTVKPGDK                     |   |    | 2.45  | 4.8   | 4    |      |
| P40925 | MDHC  | Malate dehydrogenase_cytoplasmic                 | 7 | 11 | 48    | 1.68  | 0.69 | 0.02 |
|        |       | GEFVTTVQQR                                       |   |    | 1.85  | 3.1   | 2    |      |
|        |       | DVIATDKEDVAFK                                    |   |    | 1.74  | 3.8   | 2    |      |
|        |       | VIVVGNPANTNCLTASK                                |   |    | 1.55  | 4.8   | 2    |      |
|        |       | FVEGLPINDFSR                                     |   |    | 1.89  | 2.8   | 2    |      |
|        |       | EVGVYEALKDDSWLK                                  |   |    | 1.24  | 2.9   | 2    |      |
|        |       | NVIIWGNHSSTQYPDVNHAK                             |   |    | 1.73  | 3.9   | 3    |      |
|        |       | LGVTANDVK                                        |   |    | 0.56  | 2.3   | 2    |      |
| P40926 | MDHM  | Malate dehydrogenase_mitochondrial               | 4 | 5  | 5     | 1.21  | 0.97 | 0.54 |
|        |       | VDFPQDQLTALTGR                                   |   |    | 1.16  | 2.9   | 2    |      |
|        |       | AGAGSATLSMAYAGAR                                 |   |    | 2.96  | 3.0   | 2    |      |
|        |       | GYLGPEQLPDCLK                                    |   |    | 3.91  | 2.6   | 2    |      |
|        |       | SQETECTYFSTPLLLGK                                |   |    | 1.75  | 4.1   | 2    |      |
| P40939 | ECHA  | Trifunctional enzyme subunit alpha_mitochondrial | 2 | 2  | 2     | 15.84 | 8.02 | 0.39 |
|        |       | TGIEQGS DAGYLCE SQK                              |   |    | 18.32 | 4.0   | 2    |      |
|        |       | SEVSSDEDIQFR                                     |   |    | 2.65  | 3.4   | 2    |      |
| P41218 | MNDA  | Myeloid cell nuclear differentiation antigen     | 2 | 2  | 2     | 7.70  | 0.21 | 0.18 |
|        |       | SLLAYDLGLTTK                                     |   |    | 7.69  | 3.4   | 2    |      |
|        |       | INQEEVGLAAPAPTAR                                 |   |    | 10.00 | 3.3   | 2    |      |
| P41222 | PTGDS | Prostaglandin_H2_D_isomerase                     | 2 | 3  | 10    | 2.03  | 1.46 | 0.00 |
|        |       | AQGFTEDTIVFLPQTDK                                |   |    | 1.63  | 3.5   | 2    |      |
|        |       | TMLLQPAGSLGYSYR                                  |   |    | 2.09  | 3.6   | 2    |      |
| P41250 | SYG   | Glycyl_tRNA synthetase                           | 2 | 3  | 3     | 1.17  | 0.71 | 0.52 |
|        |       | GEFTIETEGK                                       |   |    | 1.17  | 2.0   | 1    |      |

|        |       |                                                      |   |   |       |       |       |      |
|--------|-------|------------------------------------------------------|---|---|-------|-------|-------|------|
|        |       | EDKAPQVDVDKAVAELK                                    |   |   | 1.11  | 2.6   | 2     |      |
| P42330 | AK1C3 | Aldo_keto reductase family 1 member C3               | 2 | 4 | 8     | 4.11  | 1.55  | 0.02 |
|        |       | HIDSAHLYNNEEQVGLAIR                                  |   |   | 1.97  | 5.3   | 3     |      |
|        |       | TPALIALR                                             |   |   | 32.57 | 2.4   | 2     |      |
| P43251 | BTD   | Biotinidase                                          | 2 | 2 | 15    | 0.72  | 0.61  | 0.01 |
|        |       | SHLIIAQVAK                                           |   |   | 0.77  | 3.6   | 3     |      |
|        |       | LSSGLVTAALYGR                                        |   |   | 0.70  | 3.5   | 2     |      |
| P43353 | AL3B1 | Aldehyde dehydrogenase family 3 member B1            | 2 | 4 | 7     | 0.74  | 0.73  | 0.94 |
|        |       | FYGDDPQSSPNLGR                                       |   |   | 0.73  | 3.9   | 2     |      |
|        |       | NLATQLDSAFIR                                         |   |   | 1.23  | 3.3   | 2     |      |
| P43652 | AFAM  | Afamin                                               | 6 | 6 | 45    | 0.71  | 0.37  | 0.02 |
|        |       | SDVGFLPPFPTLDPEEK                                    |   |   | 0.89  | 3.4   | 2     |      |
|        |       | FTDSENVQER                                           |   |   | 0.66  | 3.4   | 2     |      |
|        |       | ESLLNHFLYEVAR                                        |   |   | 0.65  | 3.5   | 2     |      |
|        |       | IAPQLSTEELVSLGEK                                     |   |   | 0.75  | 4.6   | 2     |      |
|        |       | ICAMEGLPQK                                           |   |   | 0.68  | 2.5   | 2     |      |
|        |       | AESPEVCFNEESPK                                       |   |   | 0.46  | 3.7   | 2     |      |
| P46439 | GSTM5 | Glutathione S_transferase Mu 5                       | 2 | 3 | 4     | 11.26 | 14.64 | 0.00 |
|        |       | LGLDFPNLPYLIDGAHK                                    |   |   | 11.04 | 4.2   | 3     |      |
|        |       | HNLCGETEEEEK                                         |   |   | 27.68 | 2.8   | 2     |      |
| P46940 | IQGA1 | Ras GTPase_activating_like protein IQGAP1            | 5 | 6 | 6     | 1.18  | 0.55  | 0.31 |
|        |       | LEGVLAEVAQHYQDTLIR                                   |   |   | 2.05  | 3.6   | 3     |      |
|        |       | EQLSMMMMINKKQ+Oxidation(5),Oxidation(6),Oxidation(7) |   |   | 0.23  | 2.1   | 1     |      |
|        |       | EEIQSSISGVTAAYNR                                     |   |   | 1.17  | 4.1   | 2     |      |
|        |       | TLQALQIPAAK                                          |   |   | 2.58  | 3.1   | 2     |      |
|        |       | TLINAEDPPMVVVR                                       |   |   | 1.21  | 3.1   | 2     |      |
| P47755 | CAZA2 | F_actin_capping protein subunit alpha_2              | 3 | 3 | 7     | 1.39  | 1.35  | 0.33 |
|        |       | LLLNDNLLR                                            |   |   | 2.58  | 2.5   | 2     |      |
|        |       | FTITPSTTQVVGILK                                      |   |   | 1.35  | 3.4   | 2     |      |
|        |       | DIQDSLTVSNEVQTAK                                     |   |   | 0.53  | 2.6   | 2     |      |
| P47756 | CAPZB | F_actin_capping protein subunit beta                 | 4 | 5 | 5     | 0.77  | 0.64  | 0.88 |
|        |       | LEVEANNAFDQYR                                        |   |   | 0.77  | 2.5   | 2     |      |
|        |       | SGSGTMNLGGSLTR                                       |   |   | 0.99  | 2.4   | 2     |      |
|        |       | KLEVEANNAFDQYR                                       |   |   | 1.22  | 4.0   | 2     |      |
|        |       | GCWDSIHVVEVQEK                                       |   |   | 1.19  | 3.6   | 2     |      |
| P48448 | AL3B2 | Aldehyde dehydrogenase family 3 member B2            | 2 | 2 | 6     | 0.58  | 1.02  | 0.05 |
|        |       | LLPALQSTITR                                          |   |   | 0.51  | 2.4   | 2     |      |
|        |       | HLTPVTLELGK                                          |   |   | 20.96 | 2.9   | 1     |      |
| P48594 | SPB4  | Serpin B4                                            | 4 | 4 | 24    | 1.04  | 0.80  | 0.97 |
|        |       | INSWVESQTNEK                                         |   |   | 0.97  | 4.2   | 2     |      |
|        |       | TNSILFYGR                                            |   |   | 1.09  | 2.3   | 2     |      |
|        |       | LMEWTSLQNMNR                                         |   |   | 0.73  | 3.2   | 2     |      |
|        |       | LMEWTSLQNMNR+Oxidation(1)                            |   |   | 0.74  | 2.9   | 2     |      |
| P48741 | HSP77 | Putative heat shock 70 kDa protein 7                 | 3 | 4 | 34    | 1.42  | 1.23  | 0.11 |
|        |       | VEILANDQGNR                                          |   |   | 1.40  | 3.4   | 2     |      |
|        |       | ATAGDTHLGGEDFDNR                                     |   |   | 1.42  | 4.3   | 2     |      |
|        |       | FEELCSDLFR                                           |   |   | 1.97  | 3.6   | 2     |      |
| P48960 | CD97  | CD97 antigen                                         | 2 | 2 | 10    | 0.65  | 0.67  | 0.03 |
|        |       | GGHWATEGCQVLGSK                                      |   |   | 0.65  | 4.2   | 2     |      |

|        |       |                                                      |   |   |       |      |      |      |
|--------|-------|------------------------------------------------------|---|---|-------|------|------|------|
|        |       | VCTDVNECTSGQNPCHSSTHCLNNVGSYQCR                      |   |   | 0.51  | 4.0  | 4    |      |
| P50395 | GDIB  | Rab GDP dissociation inhibitor beta                  | 7 | 8 | 19    | 1.53 | 0.77 | 0.21 |
|        |       | DLGTESQIFISR                                         |   |   | 1.16  | 3.4  | 2    |      |
|        |       | EIRPALELLEPIEQK                                      |   |   | 1.78  | 3.5  | 3    |      |
|        |       | FVSISDLLVPK                                          |   |   | 1.68  | 2.5  | 2    |      |
|        |       | TYDATTHFETTCDIIK                                     |   |   | 1.74  | 4.0  | 2    |      |
|        |       | NPYYGGESASITPLEDLYK                                  |   |   | 1.93  | 4.8  | 2    |      |
|        |       | NTNDANSCQIIPQNVNR                                    |   |   | 2.35  | 4.0  | 2    |      |
|        |       | TDDYLDQPCYETINR                                      |   |   | 1.53  | 4.3  | 2    |      |
| P50552 | VASP  | Vasodilator_stimulated phosphoprotein                | 2 | 2 | 2     | 2.21 | 3.86 | 0.24 |
|        |       | VKQELLEEVKK                                          |   |   | 1.74  | 3.7  | 3    |      |
|        |       | SSSVTTSETQPCTPSSSDYDLQR                              |   |   | 4.43  | 4.4  | 2    |      |
| P50995 | ANX11 | Annexin A11                                          | 2 | 2 | 3     | 1.50 | 1.01 | 0.72 |
|        |       | GFGTDEQAIIIDCLGSR                                    |   |   | 1.16  | 3.1  | 2    |      |
|        |       | GTITDAPGFDPLR                                        |   |   | 1.62  | 2.7  | 2    |      |
| P51149 | RAB7A | Ras_related protein Rab_7a                           | 2 | 4 | 6     | 1.42 | 1.32 | 0.25 |
|        |       | EAINVEQAFQTIAR                                       |   |   | 1.35  | 3.9  | 2    |      |
|        |       | DPENFPFVVLGNK                                        |   |   | 2.05  | 2.8  | 2    |      |
| P51659 | DHB4  | Peroxisomal multifunctional enzyme type 2            | 2 | 2 | 2     | 1.77 | 5.62 | 0.88 |
|        |       | AVANYDSVEEGEK                                        |   |   | 1.67  | 2.5  | 2    |      |
|        |       | ATSTATSGFAGAIGQK                                     |   |   | 10.00 | 3.2  | 2    |      |
| P51884 | LUM   | Lumican                                              | 5 | 5 | 47    | 1.93 | 1.01 | 0.00 |
|        |       | ISNIPDEYFK                                           |   |   | 1.96  | 3.1  | 2    |      |
|        |       | FNALQYLR                                             |   |   | 1.93  | 2.8  | 2    |      |
|        |       | RFNALQYLR                                            |   |   | 1.90  | 3.2  | 2    |      |
|        |       | LKEDAVSAAFK                                          |   |   | 1.94  | 3.2  | 2    |      |
|        |       | ISETSLPPDMEYELR                                      |   |   | 2.28  | 2.7  | 2    |      |
| P52209 | 6PGD  | 6_phosphogluconate dehydrogenase_<br>decarboxylating | 7 | 7 | 28    | 1.64 | 0.79 | 0.73 |
|        |       | VDDFLANEAK                                           |   |   | 1.33  | 2.5  | 2    |      |
|        |       | LVPLLDTGDIIDGGNSEYR                                  |   |   | 1.20  | 5.7  | 2    |      |
|        |       | SAVENCQDSWR                                          |   |   | 2.61  | 2.9  | 2    |      |
|        |       | VGTGEPCCDWVGDEGAGHFVK                                |   |   | 2.13  | 2.5  | 2    |      |
|        |       | GILFVSGVSGGEEGAR                                     |   |   | 1.98  | 4.7  | 2    |      |
|        |       | AGQAVDDFIEK                                          |   |   | 1.22  | 2.6  | 2    |      |
|        |       | HEMLPASLIQAQR                                        |   |   | 1.38  | 2.9  | 2    |      |
| P52565 | GDIR1 | Rho GDP_dissociation inhibitor 1                     | 2 | 2 | 3     | 1.29 | 0.79 | 0.36 |
|        |       | AEEYEFLTPVEEAPK                                      |   |   | 1.30  | 3.0  | 2    |      |
|        |       | TDYMVGSYGPR                                          |   |   | 0.94  | 2.7  | 2    |      |
| P52566 | GDIR2 | Rho GDP_dissociation inhibitor 2                     | 3 | 9 | 18    | 0.97 | 0.69 | 0.52 |
|        |       | APEPHVEEDDDDELDSK                                    |   |   | 0.73  | 6.0  | 2    |      |
|        |       | TLLGDGPVVTDPK                                        |   |   | 2.63  | 3.4  | 2    |      |
|        |       | ELQEMDKDDESLIK                                       |   |   | 1.73  | 3.6  | 2    |      |
| P52790 | HXK3  | Hexokinase_3                                         | 3 | 3 | 3     | 2.10 | 2.73 | 0.24 |
|        |       | FDASVDQASINPGK                                       |   |   | 2.09  | 2.4  | 2    |      |
|        |       | LLEETLAPFR                                           |   |   | 2.99  | 2.8  | 2    |      |
|        |       | FLSEIESDSLALR                                        |   |   | 2.05  | 2.8  | 2    |      |
| P52907 | CAZA1 | F_actin_capping protein subunit alpha_1              | 2 | 2 | 3     | 1.36 | 2.64 | 0.65 |
|        |       | EASDPQPEEADGGLK                                      |   |   | 1.31  | 2.6  | 2    |      |
|        |       | DVQDSLTVSNEAQTAK                                     |   |   | 1.95  | 3.5  | 2    |      |
| P53004 | BIEA  | Biliverdin reductase A                               | 2 | 2 | 3     | 2.66 | 3.48 | 0.01 |

|        |       |                                             |   |    |      |      |      |      |
|--------|-------|---------------------------------------------|---|----|------|------|------|------|
|        |       | FGFPAFSGISR                                 |   |    | 3.00 | 2.5  | 2    |      |
|        |       | SGSLENVPNVGVNK                              |   |    | 1.60 | 2.9  | 2    |      |
| P53634 | CATC  | Dipeptidyl peptidase 1                      | 3 | 5  | 14   | 1.40 | 1.11 | 0.46 |
|        |       | YYSSEYHYVGGFYGGCNEALMK                      |   |    | 1.33 | 4.5  | 3    |      |
|        |       | NSWGTGWGENGYFR                              |   |    | 1.71 | 3.1  | 2    |      |
|        |       | GTDECAIESIAVAATPIPK                         |   |    | 1.88 | 4.0  | 2    |      |
| P53804 | TTC3  | E3 ubiquitin_protein ligase TTC3            | 2 | 2  | 6    | 0.82 | 0.65 | 0.00 |
|        |       | SSQGSPSVVAPSPKTK                            |   |    | 0.58 | 2.8  | 2    |      |
|        |       | VSNASEMYTQKNDGKEK+Oxidation(6)              |   |    | 8.47 | 2.6  | 2    |      |
| P55008 | AIF1  | Allograft inflammatory factor 1             | 2 | 2  | 3    | 0.70 | 0.75 | 0.06 |
|        |       | YSSDEDLPSKLEGFK                             |   |    | 0.64 | 2.9  | 2    |      |
|        |       | LIGEVSSGSGETFSYPDFLR                        |   |    | 1.76 | 3.9  | 2    |      |
| P55072 | TERA  | Transitional endoplasmic reticulum ATPase   | 3 | 5  | 9    | 1.41 | 0.76 | 0.67 |
|        |       | RSVSDNDIRK                                  |   |    | 0.97 | 1.9  | 1    |      |
|        |       | AIANECQANFISIK                              |   |    | 0.61 | 3.0  | 2    |      |
|        |       | LIVDEAINEDNSVVSLSQPK                        |   |    | 1.63 | 4.4  | 2    |      |
| P57721 | PCBP3 | Poly(rC)_binding protein 3                  | 2 | 4  | 8    | 1.15 | 1.81 | 0.97 |
|        |       | INISEGNCPER                                 |   |    | 1.15 | 3.0  | 2    |      |
|        |       | ESTGAQVQVAGDMLPNSTER                        |   |    | 1.40 | 4.2  | 2    |      |
| P60174 | TPIS  | Triosephosphate isomerase                   | 4 | 5  | 25   | 1.05 | 0.71 | 0.92 |
|        |       | IAVAAQNCYK                                  |   |    | 0.91 | 2.6  | 2    |      |
|        |       | IYGGSVTGATCK                                |   |    | 1.12 | 2.7  | 2    |      |
|        |       | SNVSDAVAQSTR                                |   |    | 1.08 | 3.7  | 2    |      |
|        |       | HVFGESDELIGQK                               |   |    | 1.85 | 3.2  | 2    |      |
| P60660 | MYL6  | Myosin light polypeptide 6                  | 5 | 6  | 17   | 1.47 | 1.40 | 0.21 |
|        |       | HVLVTLGEK                                   |   |    | 1.69 | 2.5  | 2    |      |
|        |       | VLDFEHFLPMLQTVAK                            |   |    | 1.74 | 4.6  | 3    |      |
|        |       | ALGQNPTNAEVLK                               |   |    | 2.38 | 3.0  | 2    |      |
|        |       | ILYSQCGDVMR                                 |   |    | 1.08 | 2.5  | 2    |      |
|        |       | NKDQGTIEDYVEGLR                             |   |    | 2.00 | 3.8  | 2    |      |
| P60709 | ACTB  | Actin_cytoplasmic 1                         | 9 | 67 | 399  | 1.56 | 0.20 | 0.00 |
|        |       | GYSFTTTAER                                  |   |    | 1.28 | 3.3  | 2    |      |
|        |       | VAPEEHPVLLTEAPLNPK                          |   |    | 1.25 | 4.5  | 3    |      |
|        |       | KDLYANTVLSGGTTMYPGIADR+Oxidation(14)        |   |    | 1.27 | 4.9  | 2    |      |
|        |       | KDLYANTVLSGGTTMYPGIADR                      |   |    | 1.72 | 5.8  | 2    |      |
|        |       | DLYANTVLSGGTTMYPGIADR+Oxidation(13)         |   |    | 1.39 | 5.7  | 2    |      |
|        |       | TTGIVMDSGDGVTHTVPIYEGYALPHAILR+Oxidation(5) |   |    | 1.17 | 5.1  | 3    |      |
|        |       | TTGIVMDSGDGVTHTVPIYEGYALPHAILR              |   |    | 1.17 | 5.5  | 3    |      |
|        |       | DLYANTVLSGGTTMYPGIADR                       |   |    | 1.69 | 6.1  | 2    |      |
|        |       | CPEALFQPSFLGMESCGIHETTENSIMK                |   |    | 1.18 | 4.4  | 3    |      |
| P61088 | UBE2N | Ubiquitin_conjugating enzyme E2 N           | 2 | 3  | 8    | 1.65 | 0.85 | 0.00 |
|        |       | YFHVVIAGPQDSPFEGGTFK                        |   |    | 1.65 | 4.1  | 3    |      |
|        |       | LELFLPEEYPMAAPK                             |   |    | 1.00 | 3.0  | 2    |      |
| P61626 | LYSC  | Lysozyme C                                  | 8 | 27 | 195  | 1.11 | 0.25 | 1.00 |
|        |       | RLGMDGYR                                    |   |    | 0.84 | 2.4  | 2    |      |
|        |       | QYVQGCGV                                    |   |    | 1.19 | 2.3  | 1    |      |
|        |       | AWVAWR                                      |   |    | 1.04 | 2.3  | 2    |      |
|        |       | STDYGIFQINSR                                |   |    | 1.12 | 4.9  | 2    |      |
|        |       | TPGAVNACHLSCSALLQDNIADAVACAK                |   |    | 1.08 | 5.8  | 3    |      |
|        |       | GISLANWMCLAK+Oxidation(7)                   |   |    | 1.15 | 2.8  | 2    |      |

|        |       |                                              |   |    |       |      |      |      |
|--------|-------|----------------------------------------------|---|----|-------|------|------|------|
|        |       | ATNYNAGDR                                    |   |    | 1.04  | 2.4  | 2    |      |
|        |       | GISLANWMCLAK                                 |   |    | 0.44  | 2.4  | 2    |      |
| P61769 | B2MG  | Beta_2_microglobulin                         | 3 | 7  | 77    | 0.88 | 0.32 | 0.00 |
|        |       | VNHVTL SQPK                                  |   |    | 0.56  | 2.9  | 2    |      |
|        |       | VEHSDLSFSK                                   |   |    | 0.71  | 3.2  | 2    |      |
|        |       | IEKVEHSDLSFSK                                |   |    | 0.98  | 4.3  | 2    |      |
| P61916 | NPC2  | Epididymal secretory protein E1              | 2 | 2  | 6     | 0.73 | 1.01 | 0.79 |
|        |       | EVNVSPCPTQPCQLSK                             |   |    | 0.93  | 3.0  | 2    |      |
|        |       | LVVEWQLQDDK                                  |   |    | 0.73  | 2.8  | 2    |      |
| P61978 | HNRPK | Heterogeneous nuclear ribonucleoprotein K    | 2 | 3  | 6     | 1.31 | 1.06 | 0.99 |
|        |       | IDEPLEGSedr                                  |   |    | 1.03  | 2.6  | 2    |      |
|        |       | GSYGLDGGPIITTQVTIPK                          |   |    | 1.56  | 3.5  | 2    |      |
| P62158 | CALM  | Calmodulin                                   | 4 | 7  | 41    | 1.28 | 0.55 | 0.38 |
|        |       | MKDTDSEEEIR+Oxidation(0)                     |   |    | 0.73  | 2.8  | 2    |      |
|        |       | VFDKDGNGYISAAELR                             |   |    | 1.30  | 4.3  | 3    |      |
|        |       | DGNGYISAAELR                                 |   |    | 1.09  | 2.7  | 2    |      |
|        |       | EAFSLFDKDGDTITTK                             |   |    | 0.87  | 2.7  | 2    |      |
| P62258 | 1433E | 14_3_3 protein epsilon                       | 4 | 4  | 17    | 0.90 | 0.91 | 1.00 |
|        |       | HLIPAANTGESK                                 |   |    | 0.69  | 2.9  | 2    |      |
|        |       | YLAEFATGNDR                                  |   |    | 0.97  | 2.5  | 2    |      |
|        |       | LICCDILDVLDK                                 |   |    | 0.60  | 3.7  | 2    |      |
|        |       | YLAEFATGNDRK                                 |   |    | 0.99  | 2.4  | 2    |      |
| P62805 | H4    | Histone H4                                   | 6 | 10 | 50    | 1.19 | 0.95 | 0.77 |
|        |       | DAVTYTEHAK                                   |   |    | 4.14  | 2.9  | 2    |      |
|        |       | ISGLIYEETR                                   |   |    | 2.60  | 3.8  | 2    |      |
|        |       | VFLENVIR                                     |   |    | 1.38  | 2.7  | 2    |      |
|        |       | TVTAMDVVYALK                                 |   |    | 1.27  | 3.1  | 2    |      |
|        |       | DNIQGITKPAIR                                 |   |    | 6.62  | 2.9  | 2    |      |
|        |       | TVTAMDVVYALK+Oxidation(4)                    |   |    | 0.87  | 2.8  | 2    |      |
| P62937 | PPIA  | Peptidyl_prolyl cis_trans isomerase A        | 3 | 8  | 61    | 1.92 | 1.34 | 0.00 |
|        |       | KITIADCGQLE                                  |   |    | 1.91  | 3.6  | 2    |      |
|        |       | IIPGFMCQGGDFTR                               |   |    | 2.07  | 3.0  | 2    |      |
|        |       | HTGPGILSMANAGPNTNGSQFFICTAK                  |   |    | 3.13  | 5.5  | 3    |      |
| P63104 | 1433Z | 14_3_3 protein zeta/delta                    | 5 | 10 | 90    | 1.16 | 0.45 | 0.80 |
|        |       | YLAEVAAGDDKK                                 |   |    | 1.45  | 3.5  | 2    |      |
|        |       | SVTEQGAELSNEER                               |   |    | 0.35  | 4.8  | 2    |      |
|        |       | DSTLIMQLLR                                   |   |    | 2.06  | 3.6  | 2    |      |
|        |       | YLAEVAAGDDK                                  |   |    | 1.22  | 2.4  | 2    |      |
|        |       | DSTLIMQLLR+Oxidation(5)                      |   |    | 1.02  | 3.1  | 2    |      |
| P63208 | SKP1  | S_phase kinase_associated protein 1          | 2 | 2  | 4     | 1.13 | 0.75 | 0.90 |
|        |       | TVANMIKGKTPEEIR+Oxidation(4)                 |   |    | 1.14  | 2.6  | 2    |      |
|        |       | NDFTEEEEAQVR                                 |   |    | 0.91  | 3.1  | 2    |      |
| P67809 | YBOX1 | Nuclease_sensitive element_binding protein 1 | 2 | 2  | 4     | 1.61 | 5.44 | 0.60 |
|        |       | EDGNEEDKENQGDDETQGGQPPQR                     |   |    | 1.60  | 4.6  | 3    |      |
|        |       | GAEAAANTGPGGVPVQGSK                          |   |    | 4.96  | 4.3  | 2    |      |
| P67936 | TPM4  | Tropomyosin alpha_4 chain                    | 6 | 10 | 45    | 1.78 | 1.41 | 0.20 |
|        |       | YSEKEDKYEEI K                                |   |    | 1.80  | 4.2  | 2    |      |
|        |       | IQALQQQAEDAEDR                               |   |    | 2.86  | 4.5  | 2    |      |
|        |       | IQLVEEELDR                                   |   |    | 2.51  | 3.2  | 2    |      |
|        |       | LVILEGELER                                   |   |    | 71.48 | 2.7  | 2    |      |

|        |       |                                        |    |     |      |      |      |      |
|--------|-------|----------------------------------------|----|-----|------|------|------|------|
|        |       | MEIQEMQLK+Oxidation(0),Oxidation(5)    |    |     | 1.39 | 2.3  | 1    |      |
|        |       | KIQALQQQADEAEDR                        |    |     | 1.61 | 4.5  | 2    |      |
| P68133 | ACTS  | Actin_ alpha skeletal muscle           | 10 | 39  | 289  | 1.24 | 0.42 | 0.07 |
|        |       | HQGVMVGMGQK+Oxidation(4),Oxidation(7)  |    |     | 1.25 | 3.8  | 3    |      |
|        |       | HQGVMVGMGQK+Oxidation(7)               |    |     | 1.39 | 3.7  | 3    |      |
|        |       | HQGVMVGMGQK+Oxidation(4)               |    |     | 1.99 | 3.8  | 3    |      |
|        |       | DSYVGDEAQS                             |    |     | 2.25 | 3.4  | 2    |      |
|        |       | HQGVMVGMGQK                            |    |     | 1.33 | 2.9  | 2    |      |
|        |       | EITALAPSTMK+Oxidation(9)               |    |     | 1.53 | 2.7  | 2    |      |
|        |       | EITALAPSTMK                            |    |     | 1.32 | 2.8  | 1    |      |
|        |       | YPIEHGIITNWDDMEK+Oxidation(13)         |    |     | 1.24 | 3.9  | 2    |      |
|        |       | YPIEHGIITNWDDMEK                       |    |     | 2.42 | 4.0  | 3    |      |
|        |       | DLTDYLMK                               |    |     | 1.23 | 2.9  | 2    |      |
| P68366 | TBA4A | Tubulin alpha_4A chain                 | 4  | 6   | 27   | 1.29 | 0.66 | 1.00 |
|        |       | AYHEQLSVAEITNACFEPANQMVK               |    |     | 0.78 | 4.3  | 3    |      |
|        |       | IHFPLATYAPVISA                         |    |     | 0.93 | 3.2  | 2    |      |
|        |       | SIQFVDWCPTGFK                          |    |     | 1.33 | 3.7  | 2    |      |
|        |       | AYHEQLSVAEITNACFEPANQMVK+Oxidation(21) |    |     | 0.89 | 3.7  | 3    |      |
| P68371 | TBB2C | Tubulin beta_2C chain                  | 3  | 7   | 17   | 0.80 | 0.61 | 0.27 |
|        |       | MSATFIGNSTAIQELFK                      |    |     | 1.55 | 4.5  | 2    |      |
|        |       | INVYYNEATGGK                           |    |     | 0.54 | 3.0  | 2    |      |
|        |       | MSATFIGNSTAIQELFK+Oxidation(0)         |    |     | 0.79 | 2.7  | 2    |      |
| P68871 | HBB   | Hemoglobin subunit beta                | 7  | 92  | 858  | 0.94 | 0.17 | 0.99 |
|        |       | GTFATLSELHCDK                          |    |     | 1.30 | 4.1  | 2    |      |
|        |       | VNVDEVGGEALGR                          |    |     | 0.99 | 4.6  | 2    |      |
|        |       | EFTPPVQAAYQK                           |    |     | 0.82 | 3.1  | 2    |      |
|        |       | SAVTALWGK                              |    |     | 1.03 | 3.1  | 2    |      |
|        |       | FFESFGDLSTPDAVMGNPK+Oxidation(14)      |    |     | 0.94 | 5.1  | 2    |      |
|        |       | LLGNVLCVLAHHFGK                        |    |     | 1.10 | 4.2  | 4    |      |
|        |       | FFESFGDLSTPDAVMGNPK                    |    |     | 0.97 | 5.4  | 2    |      |
| P69892 | HBG2  | Hemoglobin subunit gamma_2             | 3  | 12  | 81   | 0.70 | 0.50 | 0.31 |
|        |       | LLVVYPWTQR                             |    |     | 0.70 | 3.1  | 2    |      |
|        |       | FFDSFGNLSSASAIMGNPK                    |    |     | 1.67 | 3.3  | 2    |      |
|        |       | VNVEDAGGETLGR                          |    |     | 2.02 | 2.8  | 2    |      |
| P69905 | HBA   | Hemoglobin subunit alpha               | 11 | 104 | 663  | 0.67 | 0.12 | 0.97 |
|        |       | VGAHAGEYGAEALER                        |    |     | 0.67 | 5.1  | 3    |      |
|        |       | LRVDPVNFK                              |    |     | 0.67 | 2.7  | 2    |      |
|        |       | TYFPHFDLSHGSAQVK                       |    |     | 0.75 | 4.4  | 2    |      |
|        |       | MFLSFPTTK+Oxidation(0)                 |    |     | 0.88 | 2.7  | 2    |      |
|        |       | FLASVSTVLTSK                           |    |     | 0.69 | 4.3  | 2    |      |
|        |       | MFLSFPTTK                              |    |     | 1.04 | 3.0  | 2    |      |
|        |       | KVADALTNAVAHVDDMPNALSALS               |    |     | 0.97 | 5.2  | 4    |      |
|        |       | VADALTNAVAHVDDMPNALSALS                |    |     | 0.92 | 6.1  | 3    |      |
|        |       | KVADALTNAVAHVDDMPNALSALS               |    |     | 0.69 | 5.9  | 4    |      |
|        |       | VADALTNAVAHVDDMPNALSALS                |    |     | 0.97 | 7.0  | 3    |      |
|        |       | LLSHCLLVTLAAHLPAEFTPAVHASL             |    |     | 0.35 | 6.4  | 4    |      |
| P78316 | NOP14 | Nucleolar protein 14                   | 2  | 3   | 4    | 0.93 | 0.41 | 0.80 |
|        |       | RTQTLLKEYK                             |    |     | 0.93 | 2.0  | 1    |      |
|        |       | QLFNSLATQEGEWKALK                      |    |     | 1.11 | 2.4  | 2    |      |
| P78417 | GSTO1 | Glutathione S_transferase omega_1      | 2  | 2   | 2    | 1.29 | 1.26 | 0.39 |



|        |       |                                            |    |    |      |      |      |      |
|--------|-------|--------------------------------------------|----|----|------|------|------|------|
|        |       | HEVININLK                                  |    |    | 1.93 | 2.7  | 2    |      |
|        |       | SQNKEDYAGLKEEFR                            |    |    | 1.26 | 3.5  | 3    |      |
| P80188 | NGAL  | Neutrophil gelatinase-associated lipocalin | 7  | 8  | 43   | 1.44 | 0.72 | 0.84 |
|        |       | MYATIYELK                                  |    |    | 1.22 | 2.5  | 2    |      |
|        |       | TFVPGCQPGEFTLGNIK                          |    |    | 1.41 | 3.3  | 2    |      |
|        |       | SLGLPENHIVFPVPIDQCIDG                      |    |    | 1.44 | 4.1  | 2    |      |
|        |       | SYPLTSYLVR                                 |    |    | 0.80 | 2.7  | 2    |      |
|        |       | WYVVGLAGNAILR                              |    |    | 1.20 | 3.6  | 2    |      |
|        |       | VPLQQNFQDNQFQGK                            |    |    | 1.81 | 3.9  | 2    |      |
|        |       | VVSTNYNQHAMVFFK                            |    |    | 1.38 | 3.8  | 2    |      |
| P80723 | BASP1 | Brain acid soluble protein 1               | 2  | 3  | 3    | 0.81 | 1.28 | 0.88 |
|        |       | AQGPAASAEKPKVEAPAANSQTDTVKE                |    |    | 0.95 | 4.4  | 3    |      |
|        |       | AQGPAASAEKPKVEAPAANSQTDTVKE                |    |    | 0.64 | 4.6  | 3    |      |
| P80748 | LV302 | Ig lambda chain V_III region LOI           | 2  | 11 | 66   | 0.47 | 0.50 | 1.00 |
|        |       | FSGSNSGNTATLTISR                           |    |    | 0.46 | 4.4  | 2    |      |
|        |       | YVLTQPPSVSVAPGETAR                         |    |    | 1.04 | 3.7  | 2    |      |
| P98088 | MUC5A | Mucin-5AC (Fragments)                      | 13 | 14 | 24   | 1.23 | 0.40 | 0.63 |
|        |       | FHPGDVIYHTTDGTGGCISAR                      |    |    | 1.00 | 2.3  | 2    |      |
|        |       | VLVDNYFCGAEDGLSCPR                         |    |    | 0.90 | 2.3  | 2    |      |
|        |       | GQTCGLCGNFNSIQADDFR                        |    |    | 1.06 | 4.3  | 2    |      |
|        |       | NQLPPICYNYEIR                              |    |    | 1.46 | 2.4  | 2    |      |
|        |       | HQDGLVVVTTK                                |    |    | 2.34 | 2.9  | 2    |      |
|        |       | AEACVCTYNGQR                               |    |    | 5.08 | 3.2  | 2    |      |
|        |       | EQASGLCYNYQIR                              |    |    | 1.22 | 2.9  | 2    |      |
|        |       | SHPEVSIEHLGQVVQCSR                         |    |    | 2.31 | 3.7  | 3    |      |
|        |       | SVVGDVLEFGNSWK                             |    |    | 2.00 | 3.5  | 2    |      |
|        |       | MCLNYEVR                                   |    |    | 1.39 | 2.3  | 2    |      |
|        |       | VVTENVPCGTTGTTCSK                          |    |    | 1.04 | 3.6  | 2    |      |
|        |       | SLIIQQGCSSEPVK                             |    |    | 1.98 | 4.0  | 2    |      |
|        |       | NSFEDPCSLSVENEK                            |    |    | 2.72 | 4.1  | 2    |      |
| Q01105 | SET   | Protein SET                                | 2  | 2  | 2    | 0.76 | 0.85 | 0.44 |
|        |       | LNEQASEEILK                                |    |    | 0.42 | 2.4  | 2    |      |
|        |       | VEVTEFEDIK                                 |    |    | 1.19 | 2.5  | 2    |      |
| Q01469 | FABP5 | Fatty acid-binding protein_epidermal       | 3  | 4  | 9    | 1.06 | 0.96 | 0.99 |
|        |       | TTQFSCSLGEK                                |    |    | 1.36 | 2.7  | 2    |      |
|        |       | KMGAMAKPDCIITCDGKNLTIK+Oxidation(4)        |    |    | 1.05 | 2.5  | 2    |      |
|        |       | LVVECMNNVTCTR                              |    |    | 1.51 | 4.1  | 2    |      |
| Q01518 | CAP1  | Adenylyl cyclase-associated protein 1      | 5  | 7  | 25   | 1.38 | 1.22 | 0.14 |
|        |       | LSDLLAPISEIK                               |    |    | 1.97 | 3.8  | 2    |      |
|        |       | VENQENVSNLVIETELK                          |    |    | 1.08 | 4.1  | 2    |      |
|        |       | NSLDCEIVSAK                                |    |    | 2.69 | 3.0  | 2    |      |
|        |       | LEAVSHTSDMHR+Oxidation(9)                  |    |    | 0.67 | 2.7  | 2    |      |
|        |       | ALLVTASQCQQAENK                            |    |    | 1.43 | 3.6  | 2    |      |
| Q03591 | FHR1  | Complement factor H-related protein 1      | 2  | 2  | 17   | 1.28 | 1.19 | 0.03 |
|        |       | TGESAEFVCK                                 |    |    | 1.51 | 3.2  | 2    |      |
|        |       | EIMENYNIALR                                |    |    | 1.23 | 2.7  | 2    |      |
| Q04760 | LGUL  | Lactoylglutathione lyase                   | 2  | 2  | 4    | 1.59 | 2.23 | 0.36 |
|        |       | DFLLQQTMLR                                 |    |    | 1.50 | 3.0  | 2    |      |
|        |       | RFEELGVK                                   |    |    | 1.79 | 2.4  | 2    |      |
| Q04917 | 1433F | 14_3_3 protein eta                         | 3  | 7  | 33   | 1.43 | 0.50 | 0.83 |

|        |       |                                                               |    |    |      |      |      |      |
|--------|-------|---------------------------------------------------------------|----|----|------|------|------|------|
|        |       | YLAEVASGEK                                                    |    |    | 1.37 | 2.6  | 2    |      |
|        |       | AVTELNEPLSNEDR                                                |    |    | 1.82 | 4.2  | 2    |      |
|        |       | ELETVCNDVLSLLDK                                               |    |    | 1.44 | 3.8  | 2    |      |
| Q06830 | PRDX1 | Peroxiredoxin_1                                               | 5  | 11 | 77   | 1.21 | 0.55 | 0.01 |
|        |       | HGEVCPAGWKPGSDTIKPDVQK                                        |    |    | 2.41 | 5.8  | 3    |      |
|        |       | TIAQDYGVLK                                                    |    |    | 2.30 | 2.8  | 2    |      |
|        |       | LVQAFQFTDK                                                    |    |    | 0.80 | 3.2  | 2    |      |
|        |       | QGGLGPMNIPLVSDPK                                              |    |    | 1.71 | 3.4  | 2    |      |
|        |       | KQGGLGPMNIPLVSDPK                                             |    |    | 2.26 | 2.8  | 2    |      |
| Q08380 | LG3BP | Galectin_3_binding protein                                    | 10 | 30 | 267  | 0.57 | 0.10 | 0.00 |
|        |       | ASHEEVEGLVEK                                                  |    |    | 0.57 | 3.9  | 3    |      |
|        |       | RIDITLSSVK                                                    |    |    | 0.42 | 3.0  | 2    |      |
|        |       | YSSDYFQAPSDYR                                                 |    |    | 0.64 | 4.3  | 2    |      |
|        |       | AVDTWSWGER                                                    |    |    | 0.46 | 3.3  | 2    |      |
|        |       | IDITLSSVK                                                     |    |    | 0.39 | 2.8  | 2    |      |
|        |       | YYPYQSFQTPQHPSFLFQDK                                          |    |    | 0.52 | 4.0  | 2    |      |
|        |       | ELSEALGQIFDSQR                                                |    |    | 0.65 | 4.8  | 2    |      |
|        |       | SDLAVPSELALLK                                                 |    |    | 0.61 | 3.5  | 2    |      |
|        |       | TLQALEFHTVPPFQLLAR                                            |    |    | 0.52 | 4.6  | 2    |      |
|        |       | STSSFPCPAGHFNGFR                                              |    |    | 0.40 | 3.4  | 2    |      |
| Q09666 | AHNK  | Neuroblast differentiation_associated protein<br>AHNAK        | 6  | 6  | 8    | 1.30 | 1.21 | 0.80 |
|        |       | AEGPEVDVNLPK                                                  |    |    | 1.51 | 2.8  | 2    |      |
|        |       | VKGDVDVSVPK                                                   |    |    | 2.57 | 2.5  | 2    |      |
|        |       | VDVEGPDVNIIEGPEGK                                             |    |    | 1.20 | 3.3  | 2    |      |
|        |       | GEGPDVDVNLPK                                                  |    |    | 2.80 | 2.6  | 2    |      |
|        |       | VDVEVPDVSLEGPEGK                                              |    |    | 1.53 | 2.7  | 2    |      |
|        |       | VDINAPDVEVQGK                                                 |    |    | 0.71 | 2.3  | 2    |      |
| Q12805 | FBLN3 | EGF_containing fibulin_like extracellular matrix<br>protein 1 | 10 | 24 | 121  | 0.91 | 0.21 | 0.39 |
|        |       | TCQDINECETTNECR                                               |    |    | 0.79 | 4.9  | 2    |      |
|        |       | LNCEDIDECR                                                    |    |    | 0.82 | 3.4  | 2    |      |
|        |       | GSFACQCPPGYQK                                                 |    |    | 0.78 | 4.5  | 2    |      |
|        |       | ADQVCINLR                                                     |    |    | 0.93 | 3.3  | 2    |      |
|        |       | IQCAAGYEQSEHNVCQDIDECTAGTHNCR                                 |    |    | 0.86 | 6.3  | 3    |      |
|        |       | FSCMCPQGYQVVR                                                 |    |    | 0.93 | 3.6  | 2    |      |
|        |       | DIDECDIVPDACK                                                 |    |    | 0.54 | 3.2  | 2    |      |
|        |       | FSCMCPQGYQVVR+Oxidation(3)                                    |    |    | 0.68 | 3.2  | 2    |      |
|        |       | CVNHYYGGYLCLPK                                                |    |    | 0.81 | 5.1  | 3    |      |
|        |       | TCQDINECETTNECREDEMCWNYHGGFR+Oxidation(18)                    |    |    | 1.79 | 4.0  | 4    |      |
| Q12860 | CNTN1 | Contactin_1                                                   | 2  | 2  | 11   | 0.86 | 0.89 | 0.19 |
|        |       | VQVTSQEYSAR                                                   |    |    | 0.85 | 2.8  | 2    |      |
|        |       | ELTITWAPLSR                                                   |    |    | 1.54 | 2.4  | 2    |      |
| Q13228 | SBP1  | Selenium_binding protein 1                                    | 6  | 8  | 32   | 1.40 | 0.38 | 0.00 |
|        |       | HEIVQTLSLK                                                    |    |    | 1.01 | 2.5  | 2    |      |
|        |       | IYVVDVGSEPR                                                   |    |    | 0.99 | 3.4  | 2    |      |
|        |       | NTGTEAPDYLATVDVDPK                                            |    |    | 0.99 | 3.4  | 2    |      |
|        |       | GGPVQVLEDEELKSQPEPLVVK                                        |    |    | 2.64 | 4.4  | 3    |      |
|        |       | LTGQLFLGGSIVK                                                 |    |    | 1.46 | 2.9  | 2    |      |
|        |       | EEIVYLPCIYR                                                   |    |    | 1.65 | 2.6  | 2    |      |
| Q13421 | MSLN  | Mesothelin                                                    | 7  | 10 | 46   | 1.88 | 1.43 | 0.03 |

|        |       |                                              |    |    |      |      |      |      |
|--------|-------|----------------------------------------------|----|----|------|------|------|------|
|        |       | IQSFLGGAPTEDLK                               |    |    | 1.81 | 4.7  | 2    |      |
|        |       | QLLGFPCEVSGLSTER                             |    |    | 6.03 | 3.9  | 2    |      |
|        |       | GLLPVLGQPIIR                                 |    |    | 1.27 | 2.4  | 2    |      |
|        |       | GSLLEADVLR                                   |    |    | 2.51 | 2.6  | 2    |      |
|        |       | TDAVLPLTVAEVQK                               |    |    | 2.74 | 3.1  | 2    |      |
|        |       | EIDESLIFYK                                   |    |    | 1.40 | 2.7  | 1    |      |
|        |       | ALGGLACDLPGR                                 |    |    | 2.31 | 3.1  | 2    |      |
| Q13439 | GOGA4 | Golgin subfamily A member 4                  | 2  | 3  | 4    | 1.00 | 0.46 | 0.04 |
|        |       | EEGVKQDTTLNELQEQLK                           |    |    | 1.02 | 2.4  | 2    |      |
|        |       | MKQELEAKMDEQK+Oxidation(0),Oxidation(8)      |    |    | 0.94 | 2.4  | 2    |      |
| Q13642 | FHL1  | Four and a half LIM domains protein 1        | 2  | 2  | 4    | 5.53 | 6.49 | 0.00 |
|        |       | FCANTCVECR                                   |    |    | 5.97 | 2.3  | 2    |      |
|        |       | AIVAGDQNVEYK                                 |    |    | 4.86 | 2.8  | 2    |      |
| Q13938 | CAYP1 | Calcyphosin                                  | 9  | 14 | 81   | 1.03 | 0.37 | 1.00 |
|        |       | GASGIQGLAR                                   |    |    | 0.39 | 2.6  | 2    |      |
|        |       | SLDADEFR                                     |    |    | 0.78 | 2.4  | 2    |      |
|        |       | SGDGVVTVDLLR                                 |    |    | 1.18 | 3.4  | 2    |      |
|        |       | FLDNFDSSEK                                   |    |    | 0.69 | 2.9  | 2    |      |
|        |       | SGEWTEDEVLR                                  |    |    | 0.51 | 2.4  | 2    |      |
|        |       | EAVIAAAFAK                                   |    |    | 1.10 | 3.1  | 2    |      |
|        |       | LGLVLDQAEAEVCR                               |    |    | 0.79 | 4.4  | 2    |      |
|        |       | NGSGTLDLEEFLR                                |    |    | 0.73 | 2.5  | 2    |      |
|        |       | ALRPPMSQAR                                   |    |    | 0.13 | 2.4  | 2    |      |
| Q14103 | HNRPD | Heterogeneous nuclear ribonucleoprotein D0   | 2  | 2  | 3    | 1.04 | 2.56 | 0.91 |
|        |       | IFVGGLSPDTPEEK                               |    |    | 0.96 | 3.4  | 2    |      |
|        |       | FGEVVDCTLK                                   |    |    | 1.37 | 2.4  | 2    |      |
| Q14118 | DAG1  | Dystroglycan                                 | 2  | 3  | 7    | 0.90 | 0.84 | 0.97 |
|        |       | VTIPTDLIASSGDIK                              |    |    | 0.90 | 3.6  | 2    |      |
|        |       | VVENGALLSWK                                  |    |    | 0.95 | 2.4  | 2    |      |
| Q14508 | WFDC2 | WAP four_disulfide core domain protein 2     | 4  | 7  | 26   | 1.69 | 1.10 | 0.76 |
|        |       | DQCQVDSQCPCGQMK                              |    |    | 0.47 | 4.5  | 2    |      |
|        |       | CCSAGCATFCSLPNDK                             |    |    | 1.65 | 4.5  | 2    |      |
|        |       | EGSCPQVNINFPQLGLCR                           |    |    | 1.93 | 3.8  | 3    |      |
|        |       | DQCQVDSQCPCGQMK+Oxidation(12)                |    |    | 1.74 | 4.5  | 2    |      |
| Q14624 | ITIH4 | Inter_alpha_trypsin inhibitor heavy chain H4 | 10 | 18 | 73   | 1.26 | 0.42 | 0.50 |
|        |       | AEAQAQYSAAVAK                                |    |    | 1.50 | 4.8  | 2    |      |
|        |       | NPLVWVHASPEHVWTR                             |    |    | 1.05 | 3.9  | 3    |      |
|        |       | ANTVQEATFQMELPK                              |    |    | 1.50 | 3.9  | 2    |      |
|        |       | QGPVNLLSDPEQGVETGQYER                        |    |    | 1.55 | 4.2  | 2    |      |
|        |       | AGFSWIEVTFK                                  |    |    | 1.82 | 3.5  | 2    |      |
|        |       | EKAEAQAQYSAAVAK                              |    |    | 1.02 | 3.8  | 2    |      |
|        |       | AISGGSIQIENGYFVHYFAPEGLTTPMK                 |    |    | 1.59 | 3.5  | 3    |      |
|        |       | NMEQFQVSVSVAPNAK+Oxidation(1)                |    |    | 1.15 | 3.2  | 2    |      |
|        |       | SPEQQETVLDGNLIIR                             |    |    | 2.11 | 4.2  | 2    |      |
|        |       | MNFRPGVLSSR                                  |    |    | 0.90 | 2.7  | 2    |      |
| Q14651 | PLSI  | Plastin_1                                    | 2  | 3  | 21   | 1.41 | 1.00 | 0.64 |
|        |       | KIENCNYAVELGK                                |    |    | 1.82 | 3.9  | 2    |      |
|        |       | IENCNYAVELGK                                 |    |    | 1.22 | 2.9  | 2    |      |
| Q15019 | SEPT2 | Septin_2                                     | 2  | 2  | 3    | 2.85 | 1.60 | 0.16 |
|        |       | KVENEDMNKDQILLEK                             |    |    | 0.89 | 2.4  | 2    |      |

|        |       |                                                         |   |    |      |      |      |      |
|--------|-------|---------------------------------------------------------|---|----|------|------|------|------|
|        |       | ASIPFSVVGSNQLIEAK                                       |   |    | 3.68 | 3.1  | 2    |      |
| Q15084 | PDIA6 | Protein disulfide_isomerase A6                          | 2 | 2  | 2    | 2.44 | 5.80 | 0.45 |
|        |       | NLEPEWAAAASEVK                                          |   |    | 2.08 | 3.1  | 2    |      |
|        |       | TGEAIVDAALSALR                                          |   |    | 3.98 | 2.7  | 2    |      |
| Q15149 | PLEC  | Plectin                                                 | 6 | 6  | 7    | 2.31 | 0.34 | 0.00 |
|        |       | FRELAEEAAR                                              |   |    | 0.60 | 2.5  | 2    |      |
|        |       | GGELVYTDSEAR                                            |   |    | 4.00 | 2.6  | 2    |      |
|        |       | QVQVALETAQR                                             |   |    | 2.18 | 2.4  | 2    |      |
|        |       | AYSDPSTGEPATYGELQQR                                     |   |    | 5.64 | 3.5  | 2    |      |
|        |       | AQVEQELTTLR                                             |   |    | 3.88 | 2.8  | 2    |      |
|        |       | DDGTGQLLLPLSDAR                                         |   |    | 1.76 | 2.5  | 2    |      |
| Q15365 | PCBP1 | Poly(rC)_binding protein 1                              | 2 | 2  | 2    | 1.02 | 0.74 | 0.95 |
|        |       | IITLTGPTNAIFK                                           |   |    | 1.03 | 2.5  | 2    |      |
|        |       | AITIAGVPQSVTECVK                                        |   |    | 0.93 | 2.5  | 2    |      |
| Q15582 | BGH3  | Transforming growth factor_beta_induced protein ig_h3   | 7 | 11 | 53   | 0.58 | 0.18 | 0.00 |
|        |       | STVISYECCPGYEK                                          |   |    | 0.76 | 3.7  | 2    |      |
|        |       | EGVYTVFAPTNEAFR                                         |   |    | 0.60 | 3.4  | 2    |      |
|        |       | GDELADSALEIFK                                           |   |    | 0.53 | 3.5  | 2    |      |
|        |       | LTL LAPLNSVFK                                           |   |    | 0.59 | 3.0  | 2    |      |
|        |       | YHIGDEILVSGGIGALVR                                      |   |    | 0.76 | 3.7  | 3    |      |
|        |       | FSMLVAAIQSAGLTETLNR                                     |   |    | 0.71 | 3.6  | 3    |      |
|        |       | SLQGDKLEVSLK                                            |   |    | 0.47 | 2.8  | 2    |      |
| Q15828 | CYTM  | Cystatin_M                                              | 2 | 2  | 3    | 0.75 | 1.01 | 0.77 |
|        |       | VTGDHVDLTTCPAAGAQQEK                                    |   |    | 0.82 | 3.8  | 3    |      |
|        |       | AQSQLVAGIK                                              |   |    | 0.75 | 2.4  | 2    |      |
| Q16555 | DPYL2 | Dihydropyrimidinase_related protein 2                   | 2 | 3  | 7    | 0.88 | 0.88 | 0.89 |
|        |       | SSAEVIAQAR                                              |   |    | 0.79 | 2.4  | 2    |      |
|        |       | AITIANQTNCPPLYTK                                        |   |    | 1.15 | 3.8  | 2    |      |
| Q30154 | DRB5  | HLA class II histocompatibility antigen_DR beta 5 chain | 4 | 5  | 8    | 0.59 | 0.88 | 0.87 |
|        |       | FSDVGEYR                                                |   |    | 0.79 | 2.7  | 2    |      |
|        |       | HNYGVGESFTVQR                                           |   |    | 0.57 | 2.9  | 2    |      |
|        |       | SGEVYTCQVEHPSVTSPLTVEWR                                 |   |    | 0.54 | 4.6  | 2    |      |
|        |       | AVTELGRPDAEYWNSQK                                       |   |    | 1.38 | 3.7  | 2    |      |
| Q32MZ4 | LRRF1 | Leucine_rich repeat flightless_interacting protein 1    | 2 | 2  | 4    | 6.26 | 7.35 | 0.54 |
|        |       | SAVEAQNEVTENPK                                          |   |    | 1.95 | 4.1  | 2    |      |
|        |       | IAAESSENVDCPENPK                                        |   |    | 6.69 | 4.1  | 2    |      |
| Q3ZCM7 | TBB8  | Tubulin beta_8 chain                                    | 3 | 4  | 10   | 0.93 | 0.48 | 0.33 |
|        |       | AVLDLEPGTMDSVR                                          |   |    | 0.49 | 4.0  | 2    |      |
|        |       | EAESCDCLQGFQLTHSLGGTGSGMGTLTLLSK                        |   |    | 0.94 | 5.1  | 3    |      |
|        |       | AVLDLEPGTMDSVR+Oxidation(10)                            |   |    | 0.65 | 3.5  | 2    |      |
| Q562R1 | ACTBL | Beta_actin_like protein 2                               | 2 | 3  | 23   | 1.26 | 1.35 | 0.36 |
|        |       | VAPDEHPILLTEAPLNPK                                      |   |    | 1.25 | 4.2  | 3    |      |
|        |       | DLYANTVLSGGSTMYPGIADR+Oxidation(13)                     |   |    | 2.31 | 3.6  | 2    |      |
| Q5T9S5 | CCD18 | Coiled_coil domain_containing protein 18                | 2 | 3  | 11   | 0.78 | 0.56 | 0.70 |
|        |       | QLKEENNGKEK                                             |   |    | 0.77 | 2.6  | 2    |      |
|        |       | LEAQLEKKDQQFK                                           |   |    | 0.90 | 2.3  | 2    |      |
| Q5VTE0 | EF1A3 | Putative elongation factor 1_alpha_like 3               | 7 | 14 | 91   | 1.32 | 0.45 | 0.82 |
|        |       | STTTGHLYK                                               |   |    | 1.11 | 2.7  | 2    |      |
|        |       | THINIVIGHVDSGK                                          |   |    | 1.36 | 4.8  | 3    |      |

|        |       |                                                                 |    |     |       |      |      |      |
|--------|-------|-----------------------------------------------------------------|----|-----|-------|------|------|------|
|        |       | EHALLAYTLGVK                                                    |    |     | 1.12  | 3.0  | 2    |      |
|        |       | VETGVLKPGMVVTFAPVNVTEVK+Oxidation(9)                            |    |     | 1.24  | 5.4  | 3    |      |
|        |       | VETGVLKPGMVVTFAPVNVTEVK                                         |    |     | 1.38  | 4.5  | 3    |      |
|        |       | IGGIGTVPVGR                                                     |    |     | 1.33  | 3.2  | 2    |      |
|        |       | YYVTIIDAPGHR                                                    |    |     | 1.51  | 2.7  | 2    |      |
| Q5XKE5 | K2C79 | Keratin_type II cytoskeletal 79                                 | 2  | 3   | 18    | 3.43 | 2.88 | 0.00 |
|        |       | FLEQQNKVLETK                                                    |    |     | 2.06  | 4.0  | 2    |      |
|        |       | NLDLDSIIAEVK                                                    |    |     | 4.62  | 4.2  | 2    |      |
| Q6GPH6 | IPIL1 | Inositol 1_4_5_triphosphate receptor_interacting protein_like 1 | 2  | 2   | 2     | 0.77 | 1.03 | 0.57 |
|        |       | LLEMEFEER                                                       |    |     | 0.77  | 2.0  | 1    |      |
|        |       | MSEEMRLLEMEFEERK+Oxidation(4),Oxidation(9)                      |    |     | 0.68  | 2.4  | 2    |      |
| Q6IBS0 | TWF2  | Twinfilin_2                                                     | 2  | 2   | 2     | 1.65 | 3.04 | 0.49 |
|        |       | HQTLQGLAFPLQPEAQR                                               |    |     | 1.58  | 3.2  | 2    |      |
|        |       | HLSSCAAPAPLTSAER                                                |    |     | 2.05  | 3.5  | 2    |      |
| Q6NUK1 | SCMC1 | Calcium_binding mitochondrial carrier protein SCaMC_1           | 2  | 2   | 2     | 3.33 | 6.76 | 0.00 |
|        |       | TGQYSGIYDCAK                                                    |    |     | 2.57  | 2.4  | 2    |      |
|        |       | NLGIPLGQDAEEK                                                   |    |     | 3.69  | 2.3  | 2    |      |
| Q6P5S2 | CF058 | UPF0762 protein C6orf58                                         | 3  | 5   | 11    | 1.16 | 0.85 | 0.46 |
|        |       | FCYDVSSCR                                                       |    |     | 1.08  | 2.5  | 2    |      |
|        |       | SFEDRYDYYSK                                                     |    |     | 1.81  | 2.5  | 2    |      |
|        |       | YLWAAHTSTLADNIK                                                 |    |     | 1.04  | 4.4  | 2    |      |
| Q6PEY2 | TBA3E | Tubulin alpha_3E chain                                          | 2  | 3   | 18    | 1.31 | 0.81 | 0.40 |
|        |       | DVNAAIATIK                                                      |    |     | 0.75  | 2.9  | 2    |      |
|        |       | LIGQIVSSITASLR                                                  |    |     | 1.31  | 3.9  | 2    |      |
| Q7Z7M9 | GALT5 | Polypeptide N_acetylgalactosaminyltransferase 5                 | 2  | 2   | 6     | 0.64 | 0.57 | 0.01 |
|        |       | WYLENVFPDLR                                                     |    |     | 0.64  | 3.3  | 2    |      |
|        |       | EGNFNVYLSLIPVDR                                                 |    |     | 0.67  | 2.3  | 2    |      |
| Q86UX7 | URP2  | Fermitin family homolog 3                                       | 2  | 2   | 3     | 5.03 | 4.20 | 0.07 |
|        |       | VVLGGVAPALFR                                                    |    |     | 2.44  | 3.6  | 2    |      |
|        |       | VFVGEEDPEAESVTLR                                                |    |     | 10.56 | 3.7  | 2    |      |
| Q86VB7 | C163A | Scavenger receptor cysteine_rich type 1 protein M130            | 5  | 6   | 44    | 1.13 | 0.61 | 1.00 |
|        |       | HNCDHAEDAGVICSK                                                 |    |     | 1.05  | 5.1  | 3    |      |
|        |       | LVDGVTECSGR                                                     |    |     | 0.81  | 2.8  | 2    |      |
|        |       | HYCNHNEDAGVTCSDGSDLELR                                          |    |     | 1.24  | 6.2  | 3    |      |
|        |       | LEVFYNGAWGTVGK                                                  |    |     | 1.17  | 3.2  | 2    |      |
|        |       | EAEFGQGTGPIWLNEVK                                               |    |     | 1.03  | 4.4  | 2    |      |
| Q86Z20 | CC125 | Coiled_coil domain_containing protein 125                       | 2  | 3   | 4     | 0.87 | 0.55 | 0.99 |
|        |       | EEAYVMADAFRIAFAQQLMR+Oxidation(5)                               |    |     | 0.86  | 2.6  | 2    |      |
|        |       | NDQALQLTQMDKMHK+Oxidation(12)                                   |    |     | 1.03  | 2.3  | 2    |      |
| Q8IUD2 | RB6I2 | ELKS/Rab6_interacting/CAST family member 1                      | 2  | 2   | 2     | 0.73 | 1.45 | 0.61 |
|        |       | TNSTGGSSGSSVGGGSGK                                              |    |     | 0.56  | 2.4  | 2    |      |
|        |       | GQLQDELEKGER                                                    |    |     | 1.27  | 2.0  | 1    |      |
| Q8IWL2 | SFTA1 | Pulmonary surfactant_associated protein A1                      | 13 | 224 | 2283  | 0.28 | 0.03 | 0.00 |
|        |       | HQILQTR                                                         |    |     | 0.38  | 2.7  | 2    |      |
|        |       | GKEQCVEMYTDGQWNDR+Oxidation(7)                                  |    |     | 0.36  | 5.2  | 2    |      |
|        |       | GKEQCVEMYTDGQWNDR                                               |    |     | 0.09  | 5.5  | 2    |      |
|        |       | GALSLQGSIMTVGEK                                                 |    |     | 0.27  | 5.2  | 3    |      |
|        |       | EQCVEMYTDGQWNDR+Oxidation(5)                                    |    |     | 0.25  | 5.3  | 2    |      |

|        |       |                                                                      |    |    |      |      |      |      |
|--------|-------|----------------------------------------------------------------------|----|----|------|------|------|------|
|        |       | EQCVEMYTDGQWNR                                                       |    |    | 0.23 | 5.3  | 2    |      |
|        |       | GALSLQGSIMTVGEK+Oxidation(9)                                         |    |    | 0.40 | 5.3  | 2    |      |
|        |       | NPEENEAIASFVK                                                        |    |    | 0.19 | 4.6  | 2    |      |
|        |       | YSDGTPVNYTNWYR                                                       |    |    | 0.24 | 4.0  | 2    |      |
|        |       | KYNTYAYVGLTEGSPGDFR                                                  |    |    | 0.50 | 6.2  | 2    |      |
|        |       | VFSSNGQSITFDAIQEACAR                                                 |    |    | 0.40 | 6.1  | 2    |      |
|        |       | YNTYAYVGLTEGSPGDFR                                                   |    |    | 0.31 | 5.6  | 3    |      |
|        |       | GPPGLPAHLDEELQATLHDFR                                                |    |    | 0.29 | 5.0  | 3    |      |
| Q8IZP2 | ST134 | Putative protein FAM10A4                                             | 2  | 3  | 5    | 1.17 | 1.46 | 1.00 |
|        |       | AIEINPDSAQPYK                                                        |    |    | 1.13 | 2.5  | 2    |      |
|        |       | VAAIEALNDGELQK                                                       |    |    | 1.26 | 4.2  | 2    |      |
| Q8N4F0 | BPIL1 | Bactericidal/permeability_increasing protein_like 1                  | 2  | 4  | 10   | 0.92 | 1.61 | 1.00 |
|        |       | AGALNLDITGQLR                                                        |    |    | 0.66 | 3.5  | 2    |      |
|        |       | ALQVTVPHFLDWSGEALQPTR                                                |    |    | 1.04 | 5.1  | 2    |      |
| Q8NFJ5 | RAI3  | Retinoic acid_induced protein 3                                      | 3  | 4  | 7    | 0.64 | 0.44 | 0.02 |
|        |       | AHAWSPYK                                                             |    |    | 0.41 | 2.4  | 2    |      |
|        |       | TNVNVFSELSAPR                                                        |    |    | 0.64 | 3.6  | 2    |      |
|        |       | AYSQEEITQGFEETGDTLYAPYSTHFQLQNQPPQK                                  |    |    | 0.42 | 4.6  | 3    |      |
| Q8TDL5 | LPLC1 | Long palate_lung and nasal epithelium carcinoma_associated protein 1 | 20 | 42 | 251  | 1.06 | 0.29 | 0.30 |
|        |       | LVLSDCATSHGSLR                                                       |    |    | 1.40 | 3.2  | 2    |      |
|        |       | SSIGLINEK                                                            |    |    | 1.17 | 3.1  | 2    |      |
|        |       | HIIWLK                                                               |    |    | 1.01 | 2.5  | 2    |      |
|        |       | TIVEFHMTTEAQATIR                                                     |    |    | 1.54 | 2.7  | 2    |      |
|        |       | ALGFEEAESSLTK                                                        |    |    | 1.33 | 3.9  | 2    |      |
|        |       | GDQLILNLNNISSDR                                                      |    |    | 1.25 | 4.0  | 2    |      |
|        |       | LSFLVNALAK                                                           |    |    | 0.80 | 3.4  | 2    |      |
|        |       | IQLMNSGIGWFQPDVLK+Oxidation(3)                                       |    |    | 1.04 | 5.0  | 2    |      |
|        |       | LEFDLLYPAIK                                                          |    |    | 1.02 | 3.7  | 2    |      |
|        |       | EKPAGGIPVLGSLVNTVLK                                                  |    |    | 1.62 | 4.6  | 3    |      |
|        |       | IQLMNSGIGWFQPDVLK                                                    |    |    | 0.85 | 5.7  | 2    |      |
|        |       | NIITEIIHSILLPNQNGK                                                   |    |    | 1.13 | 5.1  | 2    |      |
|        |       | DALVLTASLWKPSSPVSQ                                                   |    |    | 1.01 | 4.7  | 2    |      |
|        |       | GDTIQLYLGAK                                                          |    |    | 0.96 | 3.0  | 2    |      |
|        |       | ILTQDTPEFFIDQGHAK                                                    |    |    | 1.16 | 3.9  | 2    |      |
|        |       | VITANILQLQVKPSANDQELLVK                                              |    |    | 0.65 | 3.6  | 3    |      |
|        |       | IPLDMVAGFNTPLVK+Oxidation(4)                                         |    |    | 1.93 | 3.2  | 2    |      |
|        |       | QVMNLLVPSLPNLVK                                                      |    |    | 1.52 | 3.9  | 2    |      |
|        |       | QVMNLLVPSLPNLVK+Oxidation(2)                                         |    |    | 1.21 | 3.9  | 2    |      |
|        |       | IPLDMVAGFNTPLVK                                                      |    |    | 1.85 | 3.6  | 2    |      |
| Q8WUM4 | PDC6I | Programmed cell death 6_interacting protein                          | 3  | 4  | 21   | 1.04 | 0.60 | 0.99 |
|        |       | SVIEQGGIQTVDQLIK                                                     |    |    | 0.97 | 3.8  | 2    |      |
|        |       | LLDEEEATDNDLR                                                        |    |    | 1.06 | 3.6  | 2    |      |
|        |       | NIQVSHQEFSK                                                          |    |    | 1.01 | 2.6  | 2    |      |
| Q8WWI1 | LMO7  | LIM domain only protein 7                                            | 2  | 2  | 8    | 0.78 | 1.45 | 0.30 |
|        |       | QLRYEEMQKIK+Oxidation(6)                                             |    |    | 0.74 | 2.8  | 2    |      |
|        |       | EEREEIEKQALEK                                                        |    |    | 3.57 | 2.6  | 2    |      |
| Q8WWY3 | PRP31 | U4/U6 small nuclear ribonucleoprotein Prp31                          | 2  | 2  | 2    | 0.79 | 0.42 | 0.02 |
|        |       | TVKELGNSLDKCK                                                        |    |    | 0.33 | 1.9  | 1    |      |
|        |       | MFAEIMMKIEEYISK+Oxidation(0),Oxidation(5),Oxidation(6)               |    |    | 0.84 | 2.5  | 2    |      |

|        |       |                                                 |   |    |    |       |      |      |
|--------|-------|-------------------------------------------------|---|----|----|-------|------|------|
| Q96C19 | EFHD2 | EF_hand domain_containing protein D2            | 3 | 3  | 7  | 2.04  | 3.57 | 0.22 |
|        |       | FEIEIKAEQEER                                    |   |    |    | 2.46  | 3.1  | 2    |
|        |       | LSEIDVSSEGVK                                    |   |    |    | 1.73  | 3.6  | 2    |
|        |       | ADLNQGIGEPQSPSR                                 |   |    |    | 10.45 | 3.6  | 2    |
| Q96CX2 | KCD12 | BTB/POZ domain_containing protein KCTD12        | 3 | 4  | 9  | 1.00  | 0.58 | 1.00 |
|        |       | LGAPQQPGPGPPPSR                                 |   |    |    | 1.00  | 2.7  | 2    |
|        |       | MFTQQQPQELAR                                    |   |    |    | 1.01  | 3.2  | 2    |
|        |       | DLQLVLPDYFPER                                   |   |    |    | 0.94  | 2.9  | 2    |
| Q96DA0 | ZG16B | Zymogen granule protein 16 homolog B            | 4 | 8  | 15 | 0.63  | 0.25 | 0.12 |
|        |       | YFSTTEDYDHEITGLR                                |   |    |    | 0.70  | 4.7  | 2    |
|        |       | VSVGLLLVK                                       |   |    |    | 0.63  | 3.0  | 2    |
|        |       | LGALGGNTQEVTLQPGEYITK                           |   |    |    | 0.70  | 4.9  | 2    |
|        |       | LGDSWDVK                                        |   |    |    | 0.49  | 2.7  | 2    |
| Q96KP4 | CNDP2 | Cytosolic non_specific dipeptidase              | 4 | 5  | 16 | 1.07  | 0.65 | 0.72 |
|        |       | EGGSIPVTLTFQEATGK                               |   |    |    | 1.06  | 2.7  | 2    |
|        |       | WVAIQSVSAWPEK                                   |   |    |    | 1.97  | 3.1  | 2    |
|        |       | TVFGVEPDLTR                                     |   |    |    | 1.11  | 2.7  | 2    |
|        |       | MMEVAAADVK                                      |   |    |    | 0.24  | 2.3  | 2    |
| Q96NY7 | CLIC6 | Chloride intracellular channel protein 6        | 3 | 3  | 3  | 1.19  | 0.44 | 0.25 |
|        |       | VGDGPQQEPGEDEER                                 |   |    |    | 0.16  | 3.3  | 2    |
|        |       | GAAEPEAQLSNHLAEEGPAEGSGEAAR                     |   |    |    | 0.32  | 4.6  | 3    |
|        |       | FLDGDELTLADCNLLPK                               |   |    |    | 1.46  | 2.5  | 2    |
| Q96PD5 | PGRP2 | N_acetylmuramoyl_L_alanine amidase              | 6 | 11 | 51 | 0.68  | 0.29 | 0.00 |
|        |       | AGLLRPDYALLGHR                                  |   |    |    | 0.83  | 4.1  | 3    |
|        |       | TDCPGDALFDLLR                                   |   |    |    | 0.96  | 4.0  | 2    |
|        |       | GCPDVQASLPDAK                                   |   |    |    | 0.71  | 2.5  | 2    |
|        |       | GSQTQSHPDLTGTEGCWDQLSAPR                        |   |    |    | 0.68  | 4.7  | 3    |
|        |       | DGSPDVTTADIGANTPDATK                            |   |    |    | 0.40  | 4.6  | 2    |
|        |       | EFTEAFLGCPAIHPR                                 |   |    |    | 0.81  | 2.9  | 2    |
| Q96S96 | PEBP4 | Phosphatidylethanolamine_binding protein 4      | 6 | 14 | 73 | 0.88  | 0.31 | 0.09 |
|        |       | IQGQELSAYQAPSPPAHSGFHR                          |   |    |    | 1.40  | 4.7  | 2    |
|        |       | HWLVTDIK                                        |   |    |    | 0.71  | 3.0  | 2    |
|        |       | FHLGEPEASTQFMTQNYQDSPTLQAPR+Oxidation(12)       |   |    |    | 0.68  | 5.0  | 3    |
|        |       | ITSWMEPIVK                                      |   |    |    | 0.74  | 2.8  | 2    |
|        |       | FHLGEPEASTQFMTQNYQDSPTLQAPR                     |   |    |    | 0.93  | 5.9  | 3    |
|        |       | HKNQAEIAAC                                      |   |    |    | 0.92  | 2.9  | 2    |
| Q96T17 | MA7D2 | MAP7 domain_containing protein 2                | 2 | 3  | 8  | 0.93  | 0.44 | 0.72 |
|        |       | EQEEQERLEK                                      |   |    |    | 0.92  | 2.5  | 2    |
|        |       | AYPQSPKTTKPPYPGSPVK                             |   |    |    | 0.98  | 2.5  | 2    |
| Q96TA2 | YMEL1 | ATP_dependent zinc metalloprotease YME1L1       | 2 | 3  | 5  | 0.89  | 1.04 | 0.28 |
|        |       | MVTKFGMSEK+Oxidation(0)                         |   |    |    | 0.50  | 2.0  | 1    |
|        |       | GSDVESLDKLMKTK+Oxidation(10)                    |   |    |    | 1.52  | 2.5  | 2    |
| Q99497 | PARK7 | Protein DJ_1                                    | 4 | 6  | 22 | 1.48  | 0.76 | 0.03 |
|        |       | GAEEMETVIPVDVMR                                 |   |    |    | 1.59  | 3.2  | 2    |
|        |       | EGPYDVVVLPGGNLGAQNLSESAVK                       |   |    |    | 1.43  | 4.3  | 2    |
|        |       | GAEEMETVIPVDVMR+Oxidation(4)                    |   |    |    | 32.18 | 2.3  | 2    |
|        |       | DVVICPDASLEDAKK                                 |   |    |    | 0.49  | 3.1  | 2    |
| Q99536 | VAT1  | Synaptic vesicle membrane protein VAT_1 homolog | 4 | 7  | 9  | 1.36  | 1.07 | 0.34 |
|        |       | LPPLPVTGMEGAGVVIIVGEGVSDR                       |   |    |    | 1.36  | 4.9  | 3    |

|        |       |                                                                    |    |    |      |      |      |      |
|--------|-------|--------------------------------------------------------------------|----|----|------|------|------|------|
|        |       | VVTYGMANLLTGPK                                                     |    |    | 3.87 | 2.9  | 2    |      |
|        |       | EVAEATGEDASSPPPK                                                   |    |    | 5.14 | 4.4  | 2    |      |
|        |       | TVENTVFGTASASK                                                     |    |    | 3.29 | 4.0  | 2    |      |
| Q9BW30 | TPPP3 | Tubulin polymerization_promoting protein family member 3           | 4  | 9  | 61   | 1.29 | 0.53 | 1.00 |
|        |       | QDILDDSGYVSAYK                                                     |    |    | 1.33 | 4.0  | 2    |      |
|        |       | SVTGTDVDFVFSK                                                      |    |    | 1.06 | 3.5  | 2    |      |
|        |       | SKEEAFDAICQLVAGK                                                   |    |    | 0.94 | 4.6  | 3    |      |
|        |       | VINYEEFKK                                                          |    |    | 0.73 | 2.7  | 2    |      |
| Q9H299 | SH3L3 | SH3 domain_binding glutamic acid_rich_like protein 3               | 2  | 2  | 16   | 1.05 | 1.18 | 0.97 |
|        |       | VYSTSVTGSR                                                         |    |    | 1.05 | 3.0  | 2    |      |
|        |       | IQYQLVDISQDNALR                                                    |    |    | 1.16 | 3.6  | 2    |      |
| Q9H2A7 | CXL16 | C_X_C motif chemokine 16                                           | 2  | 2  | 15   | 0.82 | 0.75 | 0.49 |
|        |       | ISSDSPPSVQFMNR                                                     |    |    | 0.83 | 3.7  | 2    |      |
|        |       | ECGHAYSGIVAHQK                                                     |    |    | 0.60 | 2.4  | 2    |      |
| Q9H4G4 | GAPR1 | Golgi_associated plant pathogenesis_related protein 1              | 2  | 3  | 3    | 0.91 | 0.94 | 0.76 |
|        |       | ASASDGSSFVVAR                                                      |    |    | 0.93 | 3.2  | 2    |      |
|        |       | GQCENLAWASYDQTGK                                                   |    |    | 0.90 | 4.0  | 2    |      |
| Q9H6S3 | ES8L2 | Epidermal growth factor receptor kinase substrate 8_like protein 2 | 2  | 3  | 4    | 0.78 | 0.36 | 0.07 |
|        |       | IVENLGILTGPQLFSLNK                                                 |    |    | 0.83 | 2.8  | 2    |      |
|        |       | SQPVSQPLTYESGPDEVR                                                 |    |    | 0.35 | 3.8  | 2    |      |
| Q9HC84 | MUC5B | Mucin_5B                                                           | 36 | 47 | 94   | 0.79 | 0.06 | 0.92 |
|        |       | VYKPCGPIQPATCNSR                                                   |    |    | 0.21 | 3.7  | 2    |      |
|        |       | SEQLGGDVESYDK                                                      |    |    | 0.24 | 4.2  | 2    |      |
|        |       | VCSTWGFDFHYK                                                       |    |    | 0.45 | 2.6  | 2    |      |
|        |       | AAGGAVCEQPLGLECR                                                   |    |    | 0.26 | 4.4  | 2    |      |
|        |       | MCFNYEIR                                                           |    |    | 0.14 | 2.8  | 2    |      |
|        |       | TGLLVEQSGDYIK                                                      |    |    | 0.26 | 3.8  | 2    |      |
|        |       | SEDCLCAALSSVHACAAK                                                 |    |    | 0.56 | 4.7  | 2    |      |
|        |       | GYQVCPVLADIECR                                                     |    |    | 0.39 | 4.5  | 2    |      |
|        |       | LEVPCQSLEAYAEICR                                                   |    |    | 0.40 | 3.4  | 2    |      |
|        |       | TLLGPAFAECHALVDSTAYLAACAQDLICR                                     |    |    | 0.89 | 4.0  | 3    |      |
|        |       | LSPSCPDALAPK                                                       |    |    | 0.35 | 2.5  | 2    |      |
|        |       | LTPLQFGNLQK                                                        |    |    | 0.17 | 2.8  | 2    |      |
|        |       | YSAEAQAMQHQCCTCCQER                                                |    |    | 0.09 | 4.5  | 3    |      |
|        |       | TGCCYSCEEDSCQVR                                                    |    |    | 0.10 | 4.7  | 2    |      |
|        |       | TCPLNMQHQECGSPCTDTCSNPQR+Oxidation(5)                              |    |    | 0.30 | 4.2  | 3    |      |
|        |       | AQAQPGVPLR                                                         |    |    | 0.02 | 2.8  | 2    |      |
|        |       | AGCHFAYVCNQHCIDIR                                                  |    |    | 0.25 | 4.2  | 3    |      |
|        |       | CGLTDNENCLK                                                        |    |    | 0.27 | 2.8  | 2    |      |
|        |       | TCPLNMQHQECGSPCTDTCSNPQR                                           |    |    | 0.32 | 4.6  | 3    |      |
|        |       | LSCLGASLQK                                                         |    |    | 0.45 | 2.9  | 2    |      |
|        |       | CVAQCGCYDKDGNYYDVGAR                                               |    |    | 0.31 | 3.9  | 3    |      |
|        |       | IVTENIPCGTTGTTCSK                                                  |    |    | 0.11 | 4.4  | 2    |      |
|        |       | VHCDVHFGLVCR                                                       |    |    | 0.19 | 3.4  | 2    |      |
|        |       | QCSILHGPTFAACR                                                     |    |    | 1.24 | 2.6  | 2    |      |
|        |       | CPPSQPFNEDQMK+Oxidation(12)                                        |    |    | 0.11 | 2.4  | 2    |      |
|        |       | GATGGLCDLTCPPTK                                                    |    |    | 0.20 | 4.4  | 2    |      |
|        |       | LYDLHGDCSYVLSK                                                     |    |    | 0.94 | 4.0  | 2    |      |



|        |       |                                                 |    |    |      |      |      |      |
|--------|-------|-------------------------------------------------|----|----|------|------|------|------|
|        |       | CPPSQPFFNEDQMK                                  |    |    | 0.49 | 3.3  | 2    |      |
|        |       | WVSNQCQSCVCDSEGSVSVQCKPLPCDAQGQPPPCNRPGFVTVTRPR |    |    | 0.41 | 4.0  | 5    |      |
|        |       | NSFEDPCSLSVENENYAR                              |    |    | 0.15 | 5.7  | 2    |      |
|        |       | NPSGHCLVDLPGLEGCYPK                             |    |    | 0.54 | 4.9  | 2    |      |
|        |       | AAQLPDMPLEELGQQVDCDR+Oxidation(6)               |    |    | 0.44 | 4.5  | 2    |      |
|        |       | SVVGDALEFGNSWK                                  |    |    | 0.64 | 3.8  | 2    |      |
|        |       | AAQLPDMPLEELGQQVDCDR                            |    |    | 0.27 | 4.9  | 2    |      |
|        |       | ELGQVVECSLDFGLVCR                               |    |    | 0.21 | 4.6  | 2    |      |
|        |       | AENYPEVSIDQVGQVLTCSLETGLTCK                     |    |    | 0.73 | 5.0  | 3    |      |
| Q9NP55 | PLUNC | Protein Plunc                                   | 2  | 2  | 12   | 1.56 | 2.19 | 0.32 |
|        |       | LQVNTPLVGASLLR                                  |    |    | 1.56 | 3.2  | 2    |      |
|        |       | VTSVIPGLNNIIDIK                                 |    |    | 1.55 | 3.3  | 2    |      |
| Q9NQ79 | CRAC1 | Cartilage acidic protein 1                      | 16 | 25 | 116  | 0.67 | 0.20 | 0.00 |
|        |       | DVAEEAGVSK                                      |    |    | 0.86 | 2.8  | 2    |      |
|        |       | LVNIAVDER                                       |    |    | 0.53 | 2.9  | 2    |      |
|        |       | GVASLFAGR                                       |    |    | 0.63 | 3.2  | 2    |      |
|        |       | GNQGFNNWLR                                      |    |    | 0.76 | 2.5  | 2    |      |
|        |       | WEDILSDEVNVAR                                   |    |    | 0.73 | 4.7  | 2    |      |
|        |       | EHGDPLIEELNPGDALEPEGR                           |    |    | 0.89 | 4.4  | 2    |      |
|        |       | IIDGGSGYLCEMEPVAFHGLGK                          |    |    | 0.80 | 3.8  | 2    |      |
|        |       | GVSVPILSSASDIFCDNENGNFLFHNR                     |    |    | 0.84 | 4.0  | 3    |      |
|        |       | DKPVCVNTYGSYR                                   |    |    | 0.54 | 2.7  | 2    |      |
|        |       | VDIVYGNWNGPHR                                   |    |    | 0.70 | 2.5  | 2    |      |
|        |       | GVALADFNR                                       |    |    | 0.64 | 3.2  | 2    |      |
|        |       | GDGTFVDAASAGVDDPHQHGR                           |    |    | 0.69 | 5.2  | 2    |      |
|        |       | DEASSVEVTWPDGK                                  |    |    | 0.90 | 3.4  | 2    |      |
|        |       | LYLQMSTHGK                                      |    |    | 0.48 | 2.4  | 2    |      |
|        |       | QGNAIGVTACDIDGDGR                               |    |    | 0.74 | 3.3  | 2    |      |
|        |       | NVASGEMNSVLEILYPR                               |    |    | 0.95 | 3.6  | 3    |      |
| Q9NQC3 | RTN4  | Reticulon_4                                     | 2  | 2  | 2    | 4.76 | 9.58 | 0.28 |
|        |       | HQAQIDHYLGLANK                                  |    |    | 7.07 | 3.7  | 2    |      |
|        |       | YSNSALGHVNCTIK                                  |    |    | 3.06 | 3.6  | 2    |      |
| Q9NUQ9 | FA49B | Protein FAM49B                                  | 2  | 3  | 3    | 0.96 | 0.77 | 0.38 |
|        |       | DQPPNSVEGLLNALR                                 |    |    | 0.96 | 3.1  | 2    |      |
|        |       | INNVPAGEGENEVNLANR                              |    |    | 2.61 | 2.7  | 2    |      |
| Q9NY65 | TBA8  | Tubulin alpha_8 chain                           | 8  | 14 | 61   | 1.01 | 0.41 | 1.00 |
|        |       | NLDIERPTYTNLNR                                  |    |    | 0.53 | 2.7  | 2    |      |
|        |       | VGINYQPPTVVPGGDLAK                              |    |    | 0.61 | 4.6  | 2    |      |
|        |       | AFVHWYVGEEMEEGEFSEAR                            |    |    | 1.27 | 4.8  | 3    |      |
|        |       | AVCMLSNTTAIAEAWAR                               |    |    | 1.05 | 4.3  | 2    |      |
|        |       | AVMIDLEPTVVDEV+Oxidation(2)                     |    |    | 0.97 | 2.4  | 2    |      |
|        |       | LISQIVSSITASLR                                  |    |    | 1.11 | 4.1  | 2    |      |
|        |       | AFVHWYVGEEMEEGEFSEAR+Oxidation(10)              |    |    | 0.75 | 4.1  | 3    |      |
|        |       | TIQFVDWCPTGFK                                   |    |    | 0.98 | 3.8  | 2    |      |
| Q9P121 | NTRI  | Neurotrimin                                     | 3  | 6  | 24   | 1.04 | 0.95 | 1.00 |
|        |       | EQSGDYECASNDVAAPVVR                             |    |    | 0.68 | 5.6  | 2    |      |
|        |       | VTVNYPPISEAK                                    |    |    | 1.16 | 2.9  | 2    |      |
|        |       | GTLQCEASAVPSAEFQWYK                             |    |    | 1.25 | 4.7  | 2    |      |
| Q9UBR2 | CATZ  | Cathepsin Z                                     | 4  | 5  | 5    | 7.92 | 6.90 | 0.00 |
|        |       | NVDGVNYASITR                                    |    |    | 3.87 | 3.3  | 2    |      |

|        |       |                                                           |    |    |       |      |      |      |
|--------|-------|-----------------------------------------------------------|----|----|-------|------|------|------|
|        |       | YNLAIEEHCTFGDPIV                                          |    |    | 7.02  | 2.5  | 2    |      |
|        |       | VGDYGSLSGR                                                |    |    | 6.65  | 2.9  | 2    |      |
|        |       | DQECDKFNQCGTCNEFK                                         |    |    | 11.12 | 4.6  | 2    |      |
| Q9UEW3 | MARCO | Macrophage receptor MARCO                                 | 3  | 3  | 18    | 0.36 | 0.22 | 0.00 |
|        |       | LQVLQAQLTWVR                                              |    |    | 0.42  | 3.9  | 2    |      |
|        |       | VSHELLQR                                                  |    |    | 0.25  | 2.9  | 2    |      |
|        |       | GTESTLWSCTK                                               |    |    | 0.62  | 2.9  | 2    |      |
| Q9UGM3 | DMBT1 | Deleted in malignant brain tumors 1 protein               | 11 | 17 | 73    | 0.74 | 0.12 | 0.17 |
|        |       | GRVEVLYR                                                  |    |    | 1.27  | 2.8  | 2    |      |
|        |       | QLGCGWATSAPGNAR                                           |    |    | 0.70  | 3.4  | 2    |      |
|        |       | FGQGSGPIVLDDVR                                            |    |    | 1.12  | 4.3  | 2    |      |
|        |       | GSWGTVCDDSWDTNDANVVCR                                     |    |    | 0.44  | 5.4  | 2    |      |
|        |       | GWFSHNCNHR                                                |    |    | 1.75  | 2.7  | 2    |      |
|        |       | DDTYGPYSSPSLR                                             |    |    | 0.52  | 2.5  | 2    |      |
|        |       | QLGCGWAMSAPGNAR                                           |    |    | 0.79  | 2.6  | 2    |      |
|        |       | GSFTSSSNFMSIR                                             |    |    | 0.90  | 2.8  | 2    |      |
|        |       | GSWGTVCDDSWDTSDANVVCR                                     |    |    | 0.09  | 5.6  | 2    |      |
|        |       | VDVVLGPIQLQTPPR                                           |    |    | 0.74  | 4.0  | 2    |      |
|        |       | GSWGTVCDDYWDTNDANVVCR                                     |    |    | 0.48  | 4.9  | 2    |      |
| Q9UGT4 | SUSD2 | Sushi domain_containing protein 2                         | 7  | 11 | 49    | 0.85 | 0.25 | 0.00 |
|        |       | AGTWLAVHPNK                                               |    |    | 0.57  | 2.5  | 2    |      |
|        |       | FFTDYGCMEQGSVCTYHPGAVHCVR                                 |    |    | 0.74  | 4.7  | 4    |      |
|        |       | GTGLTAVAVQEGNSDVVEVR                                      |    |    | 0.58  | 5.2  | 2    |      |
|        |       | HDPTFEPLFPSETTLNPSLAQEAAK                                 |    |    | 0.85  | 5.6  | 3    |      |
|        |       | GHDWGAPPFR                                                |    |    | 0.61  | 2.3  | 2    |      |
|        |       | DVQALWTNDHALAWHLSDDFR                                     |    |    | 0.84  | 3.9  | 2    |      |
|        |       | DSIQTLGHVDSSGQVHCVSPLLYESGR                               |    |    | 0.53  | 4.2  | 3    |      |
| Q9UIF8 | BAZ2B | Bromodomain adjacent to zinc finger domain protein 2B     | 2  | 2  | 4     | 1.14 | 0.99 | 0.56 |
|        |       | SIaweKSIMK+Oxidation(8)                                   |    |    | 9.86  | 2.5  | 2    |      |
|        |       | ETymKLIVSPDVLKAGNK                                        |    |    | 1.10  | 2.3  | 2    |      |
| Q9UIF9 | BAZ2A | Bromodomain adjacent to zinc finger domain protein 2A     | 2  | 3  | 4     | 1.35 | 1.68 | 0.27 |
|        |       | QFPEVIK                                                   |    |    | 3.68  | 2.3  | 2    |      |
|        |       | QqMILEEMK+Oxidation(2),Oxidation(7)                       |    |    | 1.29  | 2.1  | 1    |      |
| Q9ULV4 | COR1C | Coronin_1C                                                | 2  | 3  | 4     | 1.52 | 1.40 | 0.31 |
|        |       | AIFLADGNVFTTGFSR                                          |    |    | 1.52  | 3.3  | 2    |      |
|        |       | SIKDTICNQDER                                              |    |    | 18.05 | 2.3  | 2    |      |
| Q9ULZ3 | ASC   | Apoptosis_associated speck_like protein containing a CARD | 3  | 4  | 10    | 2.33 | 1.81 | 0.30 |
|        |       | VLTDEQYQAVR                                               |    |    | 2.28  | 3.0  | 2    |      |
|        |       | DLLLQALR                                                  |    |    | 2.64  | 2.8  | 2    |      |
|        |       | GALLSMDALDLTDK                                            |    |    | 1.30  | 3.0  | 2    |      |
| Q9UQ52 | CNTN6 | Contactin_6                                               | 4  | 4  | 8     | 0.72 | 0.60 | 0.38 |
|        |       | SDAGSYTCIATNQFGTAK                                        |    |    | 0.78  | 3.6  | 2    |      |
|        |       | VVAGNSIGIGEPSEPELLR                                       |    |    | 0.63  | 2.7  | 2    |      |
|        |       | TVSDGGDGSSEIR                                             |    |    | 1.18  | 2.8  | 2    |      |
|        |       | FVSQETGNLYIAK                                             |    |    | 0.51  | 3.0  | 2    |      |
| Q9Y279 | VSIG4 | V_set and immunoglobulin domain_containing protein 4      | 2  | 4  | 16    | 0.97 | 0.51 | 1.00 |
|        |       | GDVNLPCYDPLQGYTQVLVK                                      |    |    | 0.97  | 4.5  | 2    |      |
|        |       | SHYTCEVTWQTPDGNQVVR                                       |    |    | 0.94  | 5.0  | 2    |      |

|        |       |                                               |   |    |    |      |       |      |
|--------|-------|-----------------------------------------------|---|----|----|------|-------|------|
| Q9Y3Z3 | SAMH1 | SAM domain and HD domain_containing protein 1 | 2 | 2  | 2  | 5.33 | 19.55 | 0.78 |
|        |       | YVGETQPTGQIK                                  |   |    |    | 0.00 | 2.5   | 2    |
|        |       | EWNDSTSVQNPTR                                 |   |    |    | 5.33 | 3.5   | 2    |
| Q9Y490 | TLN1  | Talin_1                                       | 3 | 3  | 6  | 1.56 | 1.39  | 0.35 |
|        |       | AAAFEEQENETVVVK                               |   |    |    | 1.29 | 3.6   | 2    |
|        |       | AVSSAIAQLLGEVAQGNENYAGIAAR                    |   |    |    | 1.60 | 4.1   | 3    |
|        |       | AVAEQIPLLQGVGR                                |   |    |    | 2.95 | 2.7   | 2    |
| Q9Y624 | JAM1  | Junctional adhesion molecule A                | 2 | 2  | 11 | 0.65 | 0.82  | 0.24 |
|        |       | ITASYEDR                                      |   |    |    | 0.65 | 2.3   | 2    |
|        |       | VTFLPTGITFK                                   |   |    |    | 0.65 | 2.7   | 2    |
| Q9Y6R7 | FCGBP | IgGFc_binding protein                         | 9 | 12 | 32 | 1.48 | 0.82  | 0.18 |
|        |       | VVAEVQICHGK                                   |   |    |    | 1.92 | 2.7   | 2    |
|        |       | TCQGSCAALSGLTGCTTR                            |   |    |    | 1.43 | 4.2   | 2    |
|        |       | ASQHGSDDVIETDFGLR                             |   |    |    | 2.30 | 4.3   | 2    |
|        |       | VNGVLTALPVSVADGR                              |   |    |    | 1.46 | 4.1   | 2    |
|        |       | AGCVAESTAVCR                                  |   |    |    | 0.97 | 3.0   | 2    |
|        |       | AIGYATAADCGR                                  |   |    |    | 1.70 | 3.2   | 2    |
|        |       | VTLQPYNVAQLQSSVDLSGSK                         |   |    |    | 1.51 | 4.4   | 2    |
|        |       | VAVIVSNDHAGK                                  |   |    |    | 1.65 | 3.1   | 2    |
|        |       | VPAAYAGSLCGLCGNYNQDPADDLK                     |   |    |    | 1.92 | 4.5   | 3    |

### Supplemental Table III

#### Key biological processes in altered proteins using Gene Ontology analysis

| Accession Number                 | Gene Name | Protein Name                              | No. of quantified peptides | Frames | Hits | Ratio | StDev | p value |
|----------------------------------|-----------|-------------------------------------------|----------------------------|--------|------|-------|-------|---------|
| <b>Alcohol metabolic process</b> |           |                                           |                            |        |      |       |       |         |
| P00325                           | ADH1B     | Alcohol dehydrogenase 1B                  | 2                          | 3      | 6    | 12.86 | 13.23 | < 0.01  |
| P02647                           | APOA1     | Apolipoprotein A_I                        | 18                         | 64     | 449  | 2.13  | 0.28  | < 0.01  |
| P02656                           | APOC3     | Apolipoprotein C_III                      | 2                          | 5      | 44   | 4.24  | 3.13  | < 0.01  |
| P04114                           | APOB      | Apolipoprotein B_100                      | 22                         | 28     | 86   | 3.56  | 0.63  | < 0.01  |
| P05091                           | ALDH2     | Aldehyde dehydrogenase_ mitochondrial     | 12                         | 15     | 32   | 2.11  | 1.40  | 0.04    |
| P06733                           | ENOA      | Alpha_enolase                             | 9                          | 16     | 81   | 1.61  | 0.50  | < 0.01  |
| P09104                           | ENOG      | Gamma_enolase                             | 2                          | 3      | 17   | 1.70  | 1.36  | < 0.01  |
| P09467                           | F16P1     | Fructose_1_6_bisphosphatase 1             | 8                          | 14     | 58   | 1.60  | 0.99  | 0.02    |
| P09972                           | ALDOC     | Fructose_bisphosphate aldolase C          | 3                          | 4      | 8    | 1.91  | 1.31  | 0.05    |
| P30838                           | AL3A1     | Aldehyde dehydrogenase family 3 member A1 | 9                          | 13     | 58   | 3.33  | 0.89  | < 0.01  |
| P37837                           | TALDO     | Transaldolase                             | 3                          | 4      | 17   | 2.09  | 0.51  | 0.03    |
| P40925                           | MDHC      | Malate dehydrogenase_ cytoplasmic         | 7                          | 11     | 48   | 1.68  | 0.69  | 0.02    |
| <b>Cell migration</b>            |           |                                           |                            |        |      |       |       |         |
| O00560                           | SDCB1     | Syntenin_1                                | 4                          | 4      | 4    | 0.66  | 0.39  | 0.02    |
| P02647                           | APOA1     | Apolipoprotein A_I                        | 18                         | 64     | 449  | 2.13  | 0.28  | < 0.01  |
| P02751                           | FINC      | Fibronectin                               | 41                         | 91     | 436  | 0.39  | 0.07  | < 0.01  |
| P04114                           | APOB      | Apolipoprotein B_100                      | 22                         | 28     | 86   | 3.56  | 0.63  | < 0.01  |
| P05362                           | ICAM1     | Intercellular adhesion molecule 1         | 12                         | 26     | 210  | 0.60  | 0.14  | < 0.01  |
| P12429                           | ANXA3     | Annexin A3                                | 7                          | 12     | 36   | 3.34  | 0.46  | < 0.01  |
| P16070                           | CD44      | CD44 antigen                              | 5                          | 10     | 38   | 0.56  | 0.22  | < 0.01  |
| P23528                           | COF1      | Cofilin_1                                 | 5                          | 17     | 132  | 1.56  | 0.48  | < 0.01  |
| P27487                           | DPP4      | Dipeptidyl peptidase 4                    | 2                          | 2      | 4    | 0.43  | 0.38  | < 0.01  |
| P35247                           | SFTPD     | Pulmonary surfactant_associated protein D | 8                          | 32     | 330  | 0.41  | 0.11  | < 0.01  |
| P62937                           | PPIA      | Peptidyl_prolyl cis_trans isomerase A     | 3                          | 8      | 61   | 1.92  | 1.34  | < 0.01  |
| <b>Wound healing</b>             |           |                                           |                            |        |      |       |       |         |
| P01023                           | A2MG      | Alpha_2_macroglobulin                     | 41                         | 94     | 547  | 2.31  | 0.21  | < 0.01  |
| P02647                           | APOA1     | Apolipoprotein A_I                        | 18                         | 64     | 449  | 2.13  | 0.28  | < 0.01  |
| P02671                           | FIBA      | Fibrinogen alpha chain                    | 16                         | 32     | 166  | 2.78  | 0.52  | < 0.01  |
| P02675                           | FIBB      | Fibrinogen beta chain                     | 21                         | 61     | 309  | 3.17  | 0.40  | < 0.01  |
| P02679                           | FIBG      | Fibrinogen gamma chain                    | 16                         | 32     | 164  | 2.74  | 0.91  | < 0.01  |
| P02751                           | FINC      | Fibronectin                               | 41                         | 91     | 436  | 0.39  | 0.07  | < 0.01  |
| P04114                           | APOB      | Apolipoprotein B_100                      | 22                         | 28     | 86   | 3.56  | 0.63  | < 0.01  |
| P04264                           | K2C1      | Keratin_type II cytoskeletal 1            | 12                         | 18     | 75   | 1.65  | 0.46  | < 0.01  |
| P08758                           | ANXA5     | Annexin A5                                | 7                          | 12     | 56   | 2.10  | 0.63  | < 0.01  |
| P16070                           | CD44      | CD44 antigen                              | 5                          | 10     | 38   | 0.56  | 0.22  | < 0.01  |
| P21333                           | FLNA      | Filamin_A                                 | 25                         | 33     | 65   | 7.12  | 0.47  | < 0.01  |
| P23528                           | COF1      | Cofilin_1                                 | 5                          | 17     | 132  | 1.56  | 0.48  | < 0.01  |
| P62937                           | PPIA      | Peptidyl_prolyl cis_trans isomerase A     | 3                          | 8      | 61   | 1.92  | 1.34  | < 0.01  |
| <b>Proteolysis</b>               |           |                                           |                            |        |      |       |       |         |
| O96009                           | NAPSA     | Napsin_A                                  | 4                          | 8      | 90   | 0.39  | 0.27  | < 0.01  |
| P00738                           | HPT       | Haptoglobin                               | 23                         | 69     | 556  | 3.22  | 0.26  | < 0.01  |
| P00739                           | HPTR      | Haptoglobin_related protein               | 2                          | 2      | 5    | 0.63  | 0.34  | < 0.01  |
| P01024                           | CO3       | Complement C3                             | 74                         | 231    | 1701 | 0.63  | 0.05  | < 0.01  |

|                                    |       |                                             |    |     |      |       |       |        |
|------------------------------------|-------|---------------------------------------------|----|-----|------|-------|-------|--------|
| P06681                             | CO2   | Complement C2                               | 15 | 27  | 132  | 0.65  | 0.14  | < 0.01 |
| P07339                             | CATD  | Cathepsin D                                 | 10 | 32  | 53   | 2.57  | 0.85  | 0.05   |
| P20142                             | PEPC  | Gastricsin                                  | 2  | 3   | 29   | 0.19  | 0.16  | < 0.01 |
| P27487                             | DPP4  | Dipeptidyl peptidase 4                      | 2  | 2   | 4    | 0.43  | 0.38  | < 0.01 |
| P61088                             | UBE2N | Ubiquitin_conjugating enzyme E2 N           | 2  | 3   | 8    | 1.65  | 0.85  | < 0.01 |
| Q9UBR2                             | CATZ  | Cathepsin Z                                 | 4  | 5   | 5    | 7.92  | 6.90  | < 0.01 |
| <b>Oxidation reduction process</b> |       |                                             |    |     |      |       |       |        |
| O75874                             | IDHC  | Isocitrate dehydrogenase [NADP] cytoplasmic | 4  | 5   | 13   | 1.88  | 1.03  | 0.04   |
| P00325                             | ADH1B | Alcohol dehydrogenase 1B                    | 2  | 3   | 6    | 12.86 | 13.23 | < 0.01 |
| P05091                             | ALDH2 | Aldehyde dehydrogenase_ mitochondrial       | 12 | 15  | 32   | 2.11  | 1.40  | 0.04   |
| P30041                             | PRDX6 | Peroxiredoxin_6                             | 3  | 4   | 27   | 1.79  | 1.09  | 0.01   |
| P30838                             | AL3A1 | Aldehyde dehydrogenase family 3 member A1   | 9  | 13  | 58   | 3.33  | 0.89  | < 0.01 |
| P37837                             | TALDO | Transaldolase                               | 3  | 4   | 17   | 2.09  | 0.51  | 0.03   |
| P40925                             | MDHC  | Malate dehydrogenase_ cytoplasmic           | 7  | 11  | 48   | 1.68  | 0.69  | 0.02   |
| P42330                             | AK1C3 | Aldo_keto reductase family 1 member C3      | 2  | 4   | 8    | 4.11  | 1.55  | 0.02   |
| P53004                             | BIEA  | Biliverdin reductase A                      | 2  | 2   | 3    | 2.66  | 3.48  | 0.01   |
| <b>Gluconeogenesis/Glycolysis</b>  |       |                                             |    |     |      |       |       |        |
| P06733                             | ENOA  | Alpha_enolase                               | 9  | 16  | 81   | 1.61  | 0.50  | < 0.01 |
| P09104                             | ENOG  | Gamma_enolase                               | 2  | 3   | 17   | 1.70  | 1.36  | < 0.01 |
| P09467                             | F16P1 | Fructose_1_6_bisphosphatase 1               | 8  | 14  | 58   | 1.60  | 0.99  | 0.02   |
| P09972                             | ALDOC | Fructose_bisphosphate aldolase C            | 3  | 4   | 8    | 1.91  | 1.31  | 0.05   |
| P40925                             | MDHC  | Malate dehydrogenase_ cytoplasmic           | 7  | 11  | 48   | 1.68  | 0.69  | 0.02   |
| <b>Platelet activation</b>         |       |                                             |    |     |      |       |       |        |
| P01023                             | A2MG  | Alpha_2_macroglobulin                       | 41 | 94  | 547  | 2.31  | 0.21  | < 0.01 |
| P02647                             | APOA1 | Apolipoprotein A_I                          | 18 | 64  | 449  | 2.13  | 0.28  | < 0.01 |
| P02671                             | FIBA  | Fibrinogen alpha chain                      | 16 | 32  | 166  | 2.78  | 0.52  | < 0.01 |
| P02675                             | FIBB  | Fibrinogen beta chain                       | 21 | 61  | 309  | 3.17  | 0.40  | < 0.01 |
| P02679                             | FIBG  | Fibrinogen gamma chain                      | 16 | 32  | 164  | 2.74  | 0.91  | < 0.01 |
| P02751                             | FINC  | Fibronectin                                 | 41 | 91  | 436  | 0.39  | 0.07  | < 0.01 |
| P04114                             | APOB  | Apolipoprotein B_100                        | 22 | 28  | 86   | 3.56  | 0.63  | < 0.01 |
| P21333                             | FLNA  | Filamin_A                                   | 25 | 33  | 65   | 7.12  | 0.47  | < 0.01 |
| P23528                             | COF1  | Cofilin_1                                   | 5  | 17  | 132  | 1.56  | 0.48  | < 0.01 |
| P62937                             | PPIA  | Peptidyl_prolyl cis_trans isomerase A       | 3  | 8   | 61   | 1.92  | 1.34  | < 0.01 |
| <b>Inflammatory response</b>       |       |                                             |    |     |      |       |       |        |
| P01023                             | A2MG  | Alpha_2_macroglobulin                       | 41 | 94  | 547  | 2.31  | 0.21  | < 0.01 |
| P01024                             | CO3   | Complement C3                               | 74 | 231 | 1701 | 0.63  | 0.05  | < 0.01 |
| P02671                             | FIBA  | Fibrinogen alpha chain                      | 16 | 32  | 166  | 2.78  | 0.52  | < 0.01 |
| P02675                             | FIBB  | Fibrinogen beta chain                       | 21 | 61  | 309  | 3.17  | 0.40  | < 0.01 |
| P02679                             | FIBG  | Fibrinogen gamma chain                      | 16 | 32  | 164  | 2.74  | 0.91  | < 0.01 |
| P02743                             | SAMP  | Serum amyloid P_component                   | 3  | 4   | 23   | 8.23  | 0.95  | < 0.01 |
| P02747                             | C1QC  | Complement C1q subcomponent subunit C       | 3  | 4   | 25   | 0.32  | 0.25  | < 0.01 |
| P02751                             | FINC  | Fibronectin                                 | 41 | 91  | 436  | 0.39  | 0.07  | < 0.01 |
| P06681                             | CO2   | Complement C2                               | 15 | 27  | 132  | 0.65  | 0.14  | < 0.01 |
| P0C0L5                             | CO4B  | Complement C4_B                             | 47 | 112 | 708  | 0.65  | 0.08  | < 0.01 |
| P16070                             | CD44  | CD44 antigen                                | 5  | 10  | 38   | 0.56  | 0.22  | < 0.01 |
| P17931                             | LEG3  | Galectin_3                                  | 3  | 3   | 9    | 2.52  | 2.22  | < 0.01 |
| P48960                             | CD97  | CD97 antigen                                | 2  | 2   | 10   | 0.65  | 0.67  | 0.03   |

## Supplemental Table IV

The 76 significantly altered proteins in BALF of COPD patients (n=10) versus healthy controls (n=10) by the well-controlled ion-current-based approach.

| Accession Number | Gene Name | Protein name                                          | No. quantified peptides | Ratio (COPD / Normal) | Standard Deviation | p-value | GO Annotation: Cellular Location | Previously reported in COPD                                        | References                                                  | Protein abundance |
|------------------|-----------|-------------------------------------------------------|-------------------------|-----------------------|--------------------|---------|----------------------------------|--------------------------------------------------------------------|-------------------------------------------------------------|-------------------|
| P60709           | ACTB      | Actin_cytoplasmic 1                                   | 9                       | 1.56                  | 0.2                | < 0.01  | Cytoplasm                        |                                                                    |                                                             | High              |
| P07108           | DBI       | Acyl_CoA_binding protein                              | 3                       | 1.75                  | 1.92               | < 0.01  | Cytoplasm                        |                                                                    |                                                             | Moderate          |
| P00325           | ADH1B     | Alcohol dehydrogenase 1B                              | 2                       | 12.86                 | 13.23              | < 0.01  | Cytoplasm                        |                                                                    |                                                             | Low               |
| P30838           | ALDH3A1   | Aldehyde dehydrogenase family 3 member A1             | 9                       | 3.33                  | 0.89               | < 0.01  | Cytoplasm                        |                                                                    |                                                             | Moderate          |
| P05091           | ALDH2     | Aldehyde dehydrogenase_mitochondrial                  | 12                      | 2.11                  | 1.4                | 0.04    | Cytoplasm                        | Increased in quadriceps muscles of COPD patients                   | <i>International Journal of COPD</i> 2008, 3: 637–658.      | Moderate          |
| P42330           | AKR1C3    | Aldo_keto reductase family 1 member C3                | 2                       | 4.11                  | 1.55               | 0.02    | Cytoplasm                        |                                                                    |                                                             | Moderate          |
| P01023           | A2M       | Alpha_2_macroglobulin                                 | 41                      | 2.31                  | 0.21               | < 0.01  | Extracellular                    | Increased in serum of COPD patients                                | <i>Am J Respir Crit Care Med.</i> 2011, 183: 1633-1643.     | High              |
| P06733           | ENO1      | Alpha_enolase                                         | 9                       | 1.61                  | 0.5                | < 0.01  | Plasma membrane                  |                                                                    |                                                             | High              |
| P12429           | ANXA3     | Annexin A3                                            | 7                       | 3.34                  | 0.46               | < 0.01  | Plasma membrane                  |                                                                    |                                                             | Moderate          |
| P08758           | ANXA5     | Annexin A5                                            | 7                       | 2.1                   | 0.63               | < 0.01  | Cytoplasm                        |                                                                    |                                                             | Moderate          |
| P02647           | APOA1     | Apolipoprotein A_I                                    | 18                      | 2.13                  | 0.28               | < 0.01  | Extracellular; Plasma membrane   | Decreased in induced sputum of COPD patients                       | <i>Am J Respir Crit Care Med.</i> 2010, 181: 1049-60.       | High              |
| P04114           | APOB      | Apolipoprotein B_100                                  | 22                      | 3.56                  | 0.63               | < 0.01  | Extracellular; Plasma membrane   |                                                                    |                                                             | High              |
| P02656           | APOC3     | Apolipoprotein C_III                                  | 2                       | 4.24                  | 3.13               | < 0.01  | Extracellular                    |                                                                    |                                                             | Moderate          |
| P53004           | BLVRA     | Biliverdin reductase A                                | 2                       | 2.66                  | 3.48               | 0.01    | Cytoplasm                        | Increased in COPD patients                                         | <i>Pharmacol Rev.</i> 2004, 56: 515-548.                    | Low               |
| Q6NUK1           | SLC25A24  | Calcium_binding mitochondrial carrier protein SCaMC_1 | 2                       | 3.33                  | 6.76               | < 0.01  | Cytoplasm                        |                                                                    |                                                             | Low               |
| P07339           | CTSD      | Cathepsin D                                           | 10                      | 2.57                  | 0.85               | 0.05    | Extracellular                    | Increased in pulmonary macrophages of cigarette smoke-exposed mice | <i>Int Arch Allergy Immunol.</i> 2005, 138: 169–179.        | Moderate          |
| Q9UBR2           | CTSZ      | Cathepsin Z                                           | 4                       | 7.92                  | 6.9                | < 0.01  | Extracellular                    |                                                                    |                                                             | Low               |
| P16070           | CD44      | CD44 antigen                                          | 5                       | 0.56                  | 0.22               | < 0.01  | Plasma membrane                  | Decreased in pulmonary macrophage of COPD patients                 | <i>Respir Res.</i> 2012, 13: 101.                           | Moderate          |
| P48960           | CD97      | CD97 antigen                                          | 2                       | 0.65                  | 0.67               | 0.03    | Extracellular; Plasma membrane   |                                                                    |                                                             | Moderate          |
| P23528           | CFL1      | Cofilin_1                                             | 5                       | 1.56                  | 0.48               | < 0.01  | Cytoplasm                        | Increased in epithelial lining fluid of COPD patients              | <i>Electrophoresis.</i> 2013 May 28. [Epub ahead of print]. | High              |
| P02747           | C1QC      | Complement C1q subcomponent subunit C                 | 3                       | 0.32                  | 0.25               | < 0.01  | Extracellular                    |                                                                    |                                                             | Moderate          |
| P06681           | C2        | Complement C2                                         | 15                      | 0.65                  | 0.14               | < 0.01  | Extracellular                    |                                                                    |                                                             | High              |
| P01024           | C3        | Complement C3                                         | 74                      | 0.63                  | 0.05               | < 0.01  | Extracellular                    | Decreased in serum of COPD patients                                | <i>Indian J Med Res.</i> 1990, 92: 241-245.                 | High              |
| P0C0L5           | C4B       | Complement C4_B                                       | 47                      | 0.65                  | 0.08               | < 0.01  | Extracellular                    | Decreased in serum of COPD patients                                | <i>Indian J Med Res.</i> 1990, 92: 241-245.                 | High              |
| P27487           | DPP4      | Dipeptidyl peptidase 4                                | 2                       | 0.43                  | 0.38               | < 0.01  | Extracellular; Plasma membrane   | Decreased in serum of COPD patients                                | <i>Clin Biochem.</i> 2012, 45: 1245-1250.                   | Low               |
| P02671           | FGA       | Fibrinogen alpha chain                                | 16                      | 2.78                  | 0.52               | < 0.01  | Extracellular; Plasma membrane   | Increased in serum of COPD patients                                | <i>Thorax.</i> 2013, 68: 670-676.                           | High              |
| P02675           | FGB       | Fibrinogen beta chain                                 | 21                      | 3.17                  | 0.4                | < 0.01  | Extracellular; Plasma membrane   | Increased in serum of COPD patients                                | <i>Thorax.</i> 2013, 68: 670-676.                           | High              |

|        |          |                                             |    |       |       |        |                                |                                                                                                           |          |
|--------|----------|---------------------------------------------|----|-------|-------|--------|--------------------------------|-----------------------------------------------------------------------------------------------------------|----------|
| P02679 | FGG      | Fibrinogen gamma chain                      | 16 | 2.74  | 0.91  | < 0.01 | Extracellular; Plasma membrane | Increased in serum of COPD patients Thorax. 2013, 68: 670-676.                                            | High     |
| P02751 | FN1      | Fibronectin                                 | 41 | 0.39  | 0.07  | < 0.01 | Extracellular                  | Decreased in serum of severe COPD and increased in lung tissue of COPD Eur Respir J. 2008, 32: 1451-1457. | High     |
| P21333 | FLNA     | Filamin_A                                   | 25 | 7.12  | 0.47  | < 0.01 | Extracellular; Plasma membrane |                                                                                                           | High     |
| Q13642 | FHL1     | Four and a half LIM domains protein 1       | 2  | 5.53  | 6.49  | < 0.01 | Plasma membrane                |                                                                                                           | Low      |
| P09467 | FBP1     | Fructose_1_6_bisphosphatase 1               | 8  | 1.6   | 0.99  | 0.02   | Cytoplasm                      |                                                                                                           | Moderate |
| P09972 | ALDOC    | Fructose_bisphosphate aldolase C            | 3  | 1.91  | 1.31  | 0.05   | Cytoplasm                      |                                                                                                           | Moderate |
| P17931 | LGALS3   | Galectin_3                                  | 3  | 2.52  | 2.22  | < 0.01 | Extracellular; Plasma membrane | Increased in small airway of severe COPD Eur Respir J. 2007, 29: 914-922.                                 | Moderate |
| Q08380 | LGALS3BP | Galectin_3_binding protein                  | 10 | 0.57  | 0.1   | < 0.01 | Extracellular                  |                                                                                                           | High     |
| P09104 | ENO2     | Gamma_enolase                               | 2  | 1.7   | 1.36  | < 0.01 | Plasma membrane                |                                                                                                           | Moderate |
| P20142 | PGC      | Gastricsin                                  | 2  | 0.19  | 0.16  | < 0.01 | Extracellular                  |                                                                                                           | Moderate |
| P46439 | GSTM5    | Glutathione S_transferase Mu 5              | 2  | 11.26 | 14.64 | < 0.01 | Cytoplasm                      |                                                                                                           | Low      |
| P00738 | HP       | Haptoglobin                                 | 23 | 3.22  | 0.26  | < 0.01 | Extracellular                  | Increased in serum of COPD patients Am J Respir Crit Care Med. 2011, 183: 1633-1643.                      | High     |
| P00739 | HPR      | Haptoglobin_related protein                 | 2  | 0.63  | 0.34  | < 0.01 | Extracellular                  |                                                                                                           | Low      |
| P01859 | IGHG2    | Ig gamma_2 chain C region                   | 3  | 0.58  | 0.22  | < 0.01 | Extracellular                  |                                                                                                           | High     |
| P06331 | HV209    | Ig heavy chain V_II region ARH_77           | 2  | 0.64  | 0.39  | < 0.01 | Extracellular                  |                                                                                                           | Moderate |
| P06314 | KV404    | Ig kappa chain V_IV region B17              | 2  | 0.6   | 0.3   | < 0.01 | Extracellular                  |                                                                                                           | Moderate |
| P04220 | MUCB     | Ig mu heavy chain disease protein           | 7  | 4.36  | 0.52  | < 0.01 | Membrane fraction              |                                                                                                           | High     |
| P05362 | ICAM1    | Intercellular adhesion molecule 1           | 12 | 0.6   | 0.14  | < 0.01 | Extracellular; Plasma membrane | Increased in serum of COPD patients Biomark Med. 2012, 6: 805-811.                                        | High     |
| O75874 | IDH1     | Isocitrate dehydrogenase [NADP] cytoplasmic | 4  | 1.88  | 1.03  | 0.04   | Cytoplasm                      |                                                                                                           | Moderate |
| P13645 | KRT10    | Keratin_type I cytoskeletal 10              | 12 | 2.47  | 0.46  | < 0.01 | Cytoskeleton                   |                                                                                                           | Moderate |
| P35527 | KRT9     | Keratin_type I cytoskeletal 9               | 4  | 1.71  | 1.13  | 0.04   | Cytoplasm                      |                                                                                                           | Moderate |
| P04264 | KRT1     | Keratin_type II cytoskeletal 1              | 12 | 1.65  | 0.46  | < 0.01 | Plasma membrane; Cytoplasm     |                                                                                                           | High     |
| Q5XKE5 | KRT79    | Keratin_type II cytoskeletal 79             | 2  | 3.43  | 2.88  | < 0.01 | Cytoskeleton                   |                                                                                                           | Moderate |
| P51884 | LUM      | Lumican                                     | 5  | 1.93  | 1.01  | < 0.01 | Extracellular                  | Increased in lung tissue of severe emphysema Am J Respir Cell Mol Biol . 2004, 31 :601-610.               | Moderate |
| Q9UEW3 | MARCO    | Macrophage receptor MARCO                   | 3  | 0.36  | 0.22  | < 0.01 | Plasma membrane                |                                                                                                           | Moderate |
| P40925 | MDH1     | Malate dehydrogenase_cytoplasmic            | 7  | 1.68  | 0.69  | 0.02   | Cytoplasm                      |                                                                                                           | Moderate |
| Q13421 | MSLN     | Mesothelin                                  | 7  | 1.88  | 1.43  | 0.03   | Extracellular; Plasma membrane | Increased in the serum of COPD patients Clin Cancer Res . 2007, 13: 5076-5081.                            | Moderate |
| P15941 | MUC1     | Mucin_1                                     | 3  | 0.64  | 0.44  | < 0.01 | Extracellular; Plasma membrane |                                                                                                           | Moderate |
| P35749 | MYH11    | Myosin_11                                   | 2  | 4.01  | 4.03  | < 0.01 | Cytoplasm                      |                                                                                                           | Moderate |
| O96009 | NAPSA    | Napsin_A                                    | 4  | 0.39  | 0.27  | < 0.01 | Extracellular                  |                                                                                                           | High     |
| P62937 | PPIA     | Peptidyl_prolyl cis_trans isomerase A       | 3  | 1.92  | 1.34  | < 0.01 | Extracellular                  |                                                                                                           | Moderate |
| P30041 | PRDX6    | Peroxiredoxin_6                             | 3  | 1.79  | 1.09  | 0.01   | Cytoplasm                      |                                                                                                           | Moderate |
| P30086 | PEBP1    | Phosphatidylethanolamine_binding protein 1  | 4  | 1.9   | 0.95  | < 0.01 | Extracellular                  |                                                                                                           | Moderate |
| Q15149 | PLEC     | Plectin                                     | 6  | 2.31  | 0.34  | < 0.01 | Plasma membrane                |                                                                                                           | Moderate |

|        |         |                                                       |    |      |      |        |                               |                                                                                                           |          |
|--------|---------|-------------------------------------------------------|----|------|------|--------|-------------------------------|-----------------------------------------------------------------------------------------------------------|----------|
| Q7Z7M9 | GALNT5  | Polypeptide N_acetylgalactosaminyltransferase 5       | 2  | 0.64 | 0.57 | 0.01   | Cytoplasm                     |                                                                                                           | Low      |
| P41222 | PTGDS   | Prostaglandin_H2 D_isomerase                          | 2  | 2.03 | 1.46 | < 0.01 | Extracellular                 |                                                                                                           | Moderate |
| Q8IWL2 | SFTPA1  | Pulmonary surfactant_associated protein A1            | 13 | 0.28 | 0.03 | < 0.01 | Extracellular                 | Decreased in lung tissue of COPD patients<br><i>Chest.</i> 2010, 137: 37-45.                              | High     |
| P35247 | SFTPD   | Pulmonary surfactant_associated protein D             | 8  | 0.41 | 0.11 | < 0.01 | Extracellular                 | Decreased in BALF and increased in serum of COPD patients<br><i>Respir Res.</i> 2011, 12: 29.             | High     |
| Q8NFI5 | GPRC5A  | Retinoic acid_induced protein 3                       | 3  | 0.64 | 0.44 | 0.02   | Plasma membrane               |                                                                                                           | Moderate |
| P07998 | RNASE1  | Ribonuclease pancreatic                               | 5  | 0.63 | 0.19 | < 0.01 | Extracellular                 |                                                                                                           | Moderate |
| P02743 | APCS    | Serum amyloid P_component                             | 3  | 8.23 | 0.95 | < 0.01 | Extracellular                 |                                                                                                           | Moderate |
| O75368 | SH3BGRL | SH3 domain_binding glutamic acid_rich_like protein    | 3  | 1.89 | 1.35 | < 0.01 | Cytoplasm                     |                                                                                                           | Moderate |
| O95436 | SLC34A2 | Sodium_dependent phosphate transport protein 2B       | 3  | 0.61 | 0.14 | < 0.01 | Plasma membrane               |                                                                                                           | Moderate |
| O00560 | SDCBP   | Syntenin_1                                            | 4  | 0.66 | 0.39 | 0.02   | Plasma membrane               |                                                                                                           | Low      |
| P37837 | TALDO1  | Transaldolase                                         | 3  | 2.09 | 0.51 | 0.03   | Cytoplasm                     |                                                                                                           | Moderate |
| Q15582 | TGFBI   | Transforming growth factor_beta_induced protein ig_h3 | 7  | 0.58 | 0.18 | < 0.01 | Extracellular                 |                                                                                                           | Moderate |
| P37802 | TAGLN2  | Transgelin_2                                          | 7  | 1.74 | 0.97 | < 0.01 | Plasma membrane               | Increased in lung tissue of smoking-induced emphysema<br><i>Chest.</i> 2011, 140: 569A.                   | High     |
| P61088 | UBE2N   | Ubiquitin_conjugating enzyme E2 N                     | 2  | 1.65 | 0.85 | < 0.01 | Cytoplasm                     |                                                                                                           | Moderate |
| P08670 | VIM     | Vimentin                                              | 26 | 3.12 | 0.55 | 0.03   | Plasma membrane;<br>Cytoplasm | Increased in quadriceps muscles of COPD patients<br><i>International Journal of COPD</i> 2008, 3: 637-658 | High     |

The abundance of proteins observed in BALF was indicated by total spectral counts or peptide hits gained in the COPD patients vs. healthy controls dataset. The first quartile (top 25%) of proteins ranked by spectral count (high to low) were designated as high-abundance proteins; the 25-75th percentiles were designated as moderate-abundance proteins; and the last quartile of proteins were designated as low-abundance proteins. BALF: bronchoalveolar lavage fluid; COPD: chronic obstructive pulmonary disease; GO: gene ontology.
